# Supplementary material
Source: publisher figshare collection journal article supplement (https://springernature.figshare.com/articles/dataset/_/13312313)
Supplement: Supplementary file 1 [file 1]

## Sheet: HS1996-CPA1996
0101 11	01.22.13
0101 19	01.22.13
0101 19	01.22.13
0101 20	01.22.13
0101 20	01.22.13
0102 10	01.21.11
0102 10	01.21.11
0102 10	01.21.11
0102 90	01.21.12
0102 90	01.21.12
0102 90	01.21.12
0102 90	01.21.12
0102 90	01.21.12
0102 90	01.21.11
0102 90	01.21.11
0102 90	01.21.11
0102 90	01.21.11
0102 90	01.21.11
0102 90	01.21.11
0102 90	01.21.11
0103 10	01.23.10
0103 91	01.23.10
0103 91	01.23.10
0103 92	01.23.10
0103 92	01.23.10
0103 92	01.23.10
0104 10	01.22.11
0104 10	01.22.11
0104 10	01.22.11
0104 20	01.22.12
0104 20	01.22.12
0105 11	01.24.10
0105 11	01.24.10
0105 11	01.24.10
0105 11	01.24.10
0105 12	01.24.10
0105 19	01.24.10
0105 19	01.24.10
0105 92	01.24.10
0105 93	01.24.10
0105 99	01.24.10
0105 99	01.24.10
0105 99	01.24.10
0105 99	01.24.10
0106 00	01.25.10
0106 00	01.25.10
0106 00	01.25.10
0201 10	15.11.11
0201 20	15.11.11
0201 20	15.11.11
0201 20	15.11.11
0201 20	15.11.11
0201 30	15.11.11
0202 10	15.11.12
0202 20	15.11.12
0202 20	15.11.12
0202 20	15.11.12
0202 20	15.11.12
0202 30	15.11.12
0202 30	15.11.12
0202 30	15.11.12
0203 11	15.11.13
0203 11	15.11.13
0203 12	15.11.13
0203 12	15.11.13
0203 12	15.11.13
0203 19	15.11.13
0203 19	15.11.13
0203 19	15.11.13
0203 19	15.11.13
0203 19	15.11.13
0203 19	15.11.13
0203 21	15.11.14
0203 21	15.11.14
0203 22	15.11.14
0203 22	15.11.14
0203 22	15.11.14
0203 29	15.11.14
0203 29	15.11.14
0203 29	15.11.14
0203 29	15.11.14
0203 29	15.11.14
0203 29	15.11.14
0204 10	15.11.15
0204 21	15.11.15
0204 22	15.11.15
0204 22	15.11.15
0204 22	15.11.15
0204 22	15.11.15
0204 23	15.11.15
0204 30	15.11.16
0204 41	15.11.16
0204 42	15.11.16
0204 42	15.11.16
0204 42	15.11.16
0204 42	15.11.16
0204 43	15.11.16
0204 43	15.11.16
0204 50	15.11.17
0204 50	15.11.17
0204 50	15.11.17
0204 50	15.11.17
0204 50	15.11.17
0204 50	15.11.17
0204 50	15.11.17
0204 50	15.11.17
0204 50	15.11.17
0204 50	15.11.17
0204 50	15.11.17
0204 50	15.11.17
0205 00	15.11.18
0205 00	15.11.18
0205 00	15.11.18
0206 10	15.11.19
0206 10	15.11.19
0206 10	15.11.19
0206 10	15.11.19
0206 21	15.11.19
0206 22	15.11.19
0206 22	15.11.19
0206 29	15.11.19
0206 29	15.11.19
0206 29	15.11.19
0206 30	15.11.19
0206 30	15.11.19
0206 30	15.11.19
0206 30	15.11.19
0206 41	15.11.19
0206 41	15.11.19
0206 41	15.11.19
0206 49	15.11.19
0206 49	15.11.19
0206 49	15.11.19
0206 80	15.11.19
0206 80	15.11.19
0206 80	15.11.19
0206 90	15.11.19
0206 90	15.11.19
0206 90	15.11.19
0207 11	15.12.11
0207 11	15.12.11
0207 11	15.12.11
0207 12	15.12.12
0207 12	15.12.12
0207 13	15.12.11
0207 13	15.12.11
0207 13	15.12.11
0207 13	15.12.11
0207 13	15.12.11
0207 13	15.12.11
0207 13	15.12.11
0207 13	15.12.11
0207 13	15.12.11
0207 14	15.12.12
0207 14	15.12.12
0207 14	15.12.12
0207 14	15.12.12
0207 14	15.12.12
0207 14	15.12.12
0207 14	15.12.12
0207 14	15.12.12
0207 14	15.12.12
0207 24	15.12.11
0207 24	15.12.11
0207 25	15.12.12
0207 25	15.12.12
0207 26	15.12.11
0207 26	15.12.11
0207 26	15.12.11
0207 26	15.12.11
0207 26	15.12.11
0207 26	15.12.11
0207 26	15.12.11
0207 26	15.12.11
0207 26	15.12.11
0207 26	15.12.11
0207 27	15.12.12
0207 27	15.12.12
0207 27	15.12.12
0207 27	15.12.12
0207 27	15.12.12
0207 27	15.12.12
0207 27	15.12.12
0207 27	15.12.12
0207 27	15.12.12
0207 27	15.12.12
0207 32	15.12.11
0207 32	15.12.11
0207 32	15.12.11
0207 32	15.12.11
0207 32	15.12.11
0207 32	15.12.11
0207 33	15.12.12
0207 33	15.12.12
0207 33	15.12.12
0207 33	15.12.12
0207 33	15.12.12
0207 34	15.12.11
0207 34	15.12.11
0207 35	15.12.11
0207 35	15.12.11
0207 35	15.12.11
0207 35	15.12.11
0207 35	15.12.11
0207 35	15.12.11
0207 35	15.12.11
0207 35	15.12.11
0207 35	15.12.11
0207 35	15.12.11
0207 35	15.12.11
0207 35	15.12.11
0207 35	15.12.11
0207 35	15.12.11
0207 35	15.12.11
0207 36	15.12.12
0207 36	15.12.12
0207 36	15.12.12
0207 36	15.12.12
0207 36	15.12.12
0207 36	15.12.12
0207 36	15.12.12
0207 36	15.12.12
0207 36	15.12.12
0207 36	15.12.12
0207 36	15.12.12
0207 36	15.12.12
0207 36	15.12.12
0207 36	15.12.12
0207 36	15.12.12
0207 36	15.12.12
0207 36	15.12.12
0208 10	15.12.13
0208 10	15.12.13
0208 10	15.12.13
0208 20	01.25.22
0208 90	15.12.13
0208 90	15.12.13
0208 90	15.12.13
0208 90	15.12.13
0208 90	15.12.13
0208 90	15.12.13
0209 00	15.11.30
0209 00	15.11.30
0209 00	15.11.30
0209 00	15.11.30
0210 11	15.13.11
0210 11	15.13.11
0210 11	15.13.11
0210 11	15.13.11
0210 11	15.13.11
0210 12	15.13.11
0210 12	15.13.11
0210 12	15.13.11
0210 19	15.13.11
0210 19	15.13.11
0210 19	15.13.11
0210 19	15.13.11
0210 19	15.13.11
0210 19	15.13.11
0210 19	15.13.11
0210 19	15.13.11
0210 19	15.13.11
0210 19	15.13.11
0210 19	15.13.11
0210 20	15.13.11
0210 20	15.13.11
0210 90	15.13.11
0210 90	15.13.11
0210 90	15.13.11
0210 90	15.13.11
0210 90	15.13.11
0210 90	15.13.11
0210 90	15.13.11
0210 90	15.13.11
0210 90	15.13.11
0210 90	15.13.11
0210 90	15.13.11
0210 90	15.13.11
0210 90	15.13.11
0210 90	15.13.11
0301 10	05.00.11
0301 10	05.00.11
0301 91	05.00.11
0301 91	05.00.11
0301 92	05.00.11
0301 93	05.00.11
0301 99	05.00.11
0301 99	05.00.11
0301 99	05.00.11
0302 11	05.00.12
0302 11	05.00.12
0302 12	05.00.12
0302 19	05.00.12
0302 21	05.00.12
0302 21	05.00.12
0302 21	05.00.12
0302 22	05.00.12
0302 23	05.00.12
0302 29	05.00.12
0302 29	05.00.12
0302 31	05.00.12
0302 31	05.00.12
0302 32	05.00.12
0302 32	05.00.12
0302 33	05.00.12
0302 33	05.00.12
0302 39	05.00.12
0302 39	05.00.12
0302 39	05.00.12
0302 39	05.00.12
0302 40	05.00.12
0302 40	05.00.12
0302 40	05.00.12
0302 50	05.00.12
0302 50	05.00.12
0302 61	05.00.12
0302 61	05.00.12
0302 61	05.00.12
0302 61	05.00.12
0302 61	05.00.12
0302 62	05.00.12
0302 63	05.00.12
0302 64	05.00.12
0302 64	05.00.12
0302 64	05.00.12
0302 65	05.00.12
0302 65	05.00.12
0302 65	05.00.12
0302 66	05.00.12
0302 69	05.00.12
0302 69	05.00.12
0302 69	05.00.12
0302 69	05.00.12
0302 69	05.00.12
0302 69	05.00.12
0302 69	05.00.12
0302 69	05.00.12
0302 69	05.00.12
0302 69	05.00.12
0302 69	05.00.12
0302 69	05.00.12
0302 69	05.00.12
0302 69	05.00.12
0302 69	05.00.12
0302 69	05.00.12
0302 69	05.00.12
0302 69	05.00.12
0302 69	05.00.12
0302 69	05.00.12
0302 69	05.00.12
0302 69	05.00.12
0302 69	05.00.12
0302 69	05.00.12
0302 70	15.20.11
0303 10	15.20.12
0303 21	15.20.12
0303 21	15.20.12
0303 22	15.20.12
0303 29	15.20.12
0303 31	15.20.12
0303 31	15.20.12
0303 31	15.20.12
0303 32	15.20.12
0303 33	15.20.12
0303 39	15.20.12
0303 39	15.20.12
0303 39	15.20.12
0303 39	15.20.12
0303 41	15.20.12
0303 41	15.20.12
0303 41	15.20.12
0303 41	15.20.12
0303 42	15.20.12
0303 42	15.20.12
0303 42	15.20.12
0303 42	15.20.12
0303 42	15.20.12
0303 42	15.20.12
0303 42	15.20.12
0303 43	15.20.12
0303 43	15.20.12
0303 43	15.20.12
0303 43	15.20.12
0303 49	15.20.12
0303 49	15.20.12
0303 49	15.20.12
0303 49	15.20.12
0303 49	15.20.12
0303 49	15.20.12
0303 49	15.20.12
0303 50	15.20.12
0303 50	15.20.12
0303 50	15.20.12
0303 60	15.20.12
0303 60	15.20.12
0303 60	15.20.12
0303 71	15.20.12
0303 71	15.20.12
0303 71	15.20.12
0303 71	15.20.12
0303 71	15.20.12
0303 72	15.20.12
0303 73	15.20.12
0303 74	15.20.12
0303 74	15.20.12
0303 74	15.20.12
0303 74	15.20.12
0303 75	15.20.12
0303 75	15.20.12
0303 75	15.20.12
0303 76	15.20.12
0303 77	15.20.12
0303 78	15.20.12
0303 78	15.20.12
0303 79	15.20.12
0303 79	15.20.12
0303 79	15.20.12
0303 79	15.20.12
0303 79	15.20.12
0303 79	15.20.12
0303 79	15.20.12
0303 79	15.20.12
0303 79	15.20.12
0303 79	15.20.12
0303 79	15.20.12
0303 79	15.20.12
0303 79	15.20.12
0303 79	15.20.12
0303 79	15.20.12
0303 79	15.20.12
0303 79	15.20.12
0303 79	15.20.12
0303 79	15.20.12
0303 79	15.20.12
0303 79	15.20.12
0303 79	15.20.12
0303 79	15.20.12
0303 79	15.20.12
0303 79	15.20.12
0303 79	15.20.12
0303 79	15.20.12
0303 79	15.20.12
0303 80	15.20.12
0304 10	15.20.11
0304 10	15.20.11
0304 10	15.20.11
0304 10	15.20.11
0304 10	15.20.11
0304 10	15.20.11
0304 10	15.20.11
0304 10	15.20.11
0304 10	15.20.11
0304 10	15.20.11
0304 10	15.20.11
0304 10	15.20.11
0304 20	15.20.12
0304 20	15.20.12
0304 20	15.20.12
0304 20	15.20.12
0304 20	15.20.12
0304 20	15.20.12
0304 20	15.20.12
0304 20	15.20.12
0304 20	15.20.12
0304 20	15.20.12
0304 20	15.20.12
0304 20	15.20.12
0304 20	15.20.12
0304 20	15.20.12
0304 20	15.20.12
0304 20	15.20.12
0304 20	15.20.12
0304 20	15.20.12
0304 20	15.20.12
0304 20	15.20.12
0304 20	15.20.12
0304 20	15.20.12
0304 20	15.20.12
0304 20	15.20.12
0304 20	15.20.12
0304 20	15.20.12
0304 20	15.20.12
0304 20	15.20.12
0304 90	15.20.12
0304 90	15.20.12
0304 90	15.20.12
0304 90	15.20.12
0304 90	15.20.12
0304 90	15.20.12
0304 90	15.20.12
0304 90	15.20.12
0304 90	15.20.12
0304 90	15.20.12
0304 90	15.20.12
0304 90	15.20.12
0304 90	15.20.12
0304 90	15.20.12
0304 90	15.20.12
0304 90	15.20.12
0304 90	15.20.12
0304 90	15.20.12
0304 90	15.20.12
0304 90	15.20.12
0305 10	15.20.13
0305 20	15.20.13
0305 30	15.20.13
0305 30	15.20.13
0305 30	15.20.13
0305 30	15.20.13
0305 30	15.20.13
0305 41	15.20.13
0305 42	15.20.13
0305 49	15.20.13
0305 49	15.20.13
0305 49	15.20.13
0305 49	15.20.13
0305 49	15.20.13
0305 49	15.20.13
0305 51	15.20.13
0305 51	15.20.13
0305 59	15.20.13
0305 59	15.20.13
0305 59	15.20.13
0305 59	15.20.13
0305 59	15.20.13
0305 59	15.20.13
0305 59	15.20.13
0305 61	15.20.13
0305 62	15.20.13
0305 63	15.20.13
0305 69	15.20.13
0305 69	15.20.13
0305 69	15.20.13
0305 69	15.20.13
0305 69	15.20.13
0306 11	15.20.15
0306 11	15.20.15
0306 12	15.20.15
0306 12	15.20.15
0306 13	15.20.15
0306 13	15.20.15
0306 13	15.20.15
0306 14	15.20.15
0306 14	15.20.15
0306 14	15.20.15
0306 19	15.20.15
0306 19	15.20.15
0306 19	15.20.15
0306 21	05.00.21
0306 22	05.00.21
0306 22	05.00.21
0306 22	05.00.21
0306 23	05.00.21
0306 23	05.00.21
0306 23	05.00.21
0306 23	05.00.21
0306 24	05.00.21
0306 24	05.00.21
0306 24	05.00.21
0306 29	05.00.21
0306 29	05.00.21
0306 29	05.00.21
0307 10	05.00.22
0307 10	05.00.22
0307 21	05.00.23
0307 29	15.20.15
0307 29	15.20.15
0307 31	05.00.23
0307 31	05.00.23
0307 39	15.20.15
0307 39	15.20.15
0307 41	05.00.23
0307 41	05.00.23
0307 41	05.00.23
0307 49	15.20.15
0307 49	15.20.15
0307 49	15.20.15
0307 49	15.20.15
0307 49	15.20.15
0307 49	15.20.15
0307 49	15.20.15
0307 49	15.20.15
0307 49	15.20.15
0307 49	15.20.15
0307 49	15.20.15
0307 49	15.20.15
0307 51	05.00.23
0307 59	15.20.15
0307 59	15.20.15
0307 60	01.25.22
0307 91	05.00.23
0307 99	15.20.15
0307 99	15.20.15
0307 99	15.20.15
0307 99	15.20.15
0307 99	15.20.15
0401 10	15.51.11
0401 10	15.51.11
0401 20	01.21.20
0401 20	01.21.20
0401 20	01.21.20
0401 20	01.21.20
0401 20	01.22.21
0401 20	01.22.21
0401 20	01.22.21
0401 20	01.22.21
0401 20	01.22.22
0401 20	01.22.22
0401 20	01.22.22
0401 20	01.22.22
0401 20	15.51.11
0401 20	15.51.11
0401 20	15.51.11
0401 20	15.51.11
0401 20	01.21.20
0401 20	01.21.20
0401 20	01.21.20
0401 20	01.21.20
0401 20	01.22.21
0401 20	01.22.21
0401 20	01.22.21
0401 20	01.22.21
0401 20	01.22.22
0401 20	01.22.22
0401 20	01.22.22
0401 20	01.22.22
0401 20	15.51.11
0401 20	15.51.11
0401 20	15.51.11
0401 20	15.51.11
0401 20	01.21.20
0401 20	01.21.20
0401 20	01.21.20
0401 20	01.21.20
0401 20	01.22.21
0401 20	01.22.21
0401 20	01.22.21
0401 20	01.22.21
0401 20	01.22.22
0401 20	01.22.22
0401 20	01.22.22
0401 20	01.22.22
0401 20	15.51.11
0401 20	15.51.11
0401 20	15.51.11
0401 20	15.51.11
0401 20	01.21.20
0401 20	01.21.20
0401 20	01.21.20
0401 20	01.21.20
0401 20	01.22.21
0401 20	01.22.21
0401 20	01.22.21
0401 20	01.22.21
0401 20	01.22.22
0401 20	01.22.22
0401 20	01.22.22
0401 20	01.22.22
0401 20	15.51.11
0401 20	15.51.11
0401 20	15.51.11
0401 20	15.51.11
0401 30	15.51.12
0401 30	15.51.12
0401 30	15.51.12
0401 30	15.51.12
0401 30	15.51.12
0401 30	15.51.12
0402 10	15.51.20
0402 10	15.51.20
0402 10	15.51.20
0402 10	15.51.20
0402 21	15.51.20
0402 21	15.51.20
0402 21	15.51.20
0402 21	15.51.20
0402 21	15.51.20
0402 29	15.51.20
0402 29	15.51.20
0402 29	15.51.20
0402 29	15.51.20
0402 29	15.51.20
0402 91	15.51.51
0402 91	15.51.51
0402 91	15.51.51
0402 91	15.51.51
0402 91	15.51.51
0402 91	15.51.51
0402 91	15.51.51
0402 91	15.51.51
0402 99	15.51.51
0402 99	15.51.51
0402 99	15.51.51
0402 99	15.51.51
0402 99	15.51.51
0402 99	15.51.51
0403 10	15.51.52
0403 10	15.51.52
0403 10	15.51.52
0403 10	15.51.52
0403 10	15.51.52
0403 10	15.51.52
0403 10	15.51.52
0403 10	15.51.52
0403 10	15.51.52
0403 10	15.51.52
0403 10	15.51.52
0403 10	15.51.52
0403 90	15.51.52
0403 90	15.51.52
0403 90	15.51.52
0403 90	15.51.52
0403 90	15.51.52
0403 90	15.51.52
0403 90	15.51.52
0403 90	15.51.52
0403 90	15.51.52
0403 90	15.51.52
0403 90	15.51.52
0403 90	15.51.52
0403 90	15.51.52
0403 90	15.51.52
0403 90	15.51.52
0403 90	15.51.52
0403 90	15.51.52
0403 90	15.51.52
0404 10	15.51.55
0404 10	15.51.55
0404 10	15.51.55
0404 10	15.51.55
0404 10	15.51.55
0404 10	15.51.55
0404 10	15.51.55
0404 10	15.51.55
0404 10	15.51.55
0404 10	15.51.55
0404 10	15.51.55
0404 10	15.51.55
0404 10	15.51.55
0404 10	15.51.55
0404 10	15.51.55
0404 10	15.51.55
0404 10	15.51.55
0404 10	15.51.55
0404 10	15.51.55
0404 10	15.51.55
0404 10	15.51.55
0404 10	15.51.55
0404 10	15.51.55
0404 10	15.51.55
0404 90	15.51.55
0404 90	15.51.55
0404 90	15.51.55
0404 90	15.51.55
0404 90	15.51.55
0404 90	15.51.55
0405 10	15.51.30
0405 10	15.51.30
0405 10	15.51.30
0405 10	15.51.30
0405 10	15.51.30
0405 20	15.51.30
0405 20	15.51.30
0405 20	15.51.30
0405 90	15.51.30
0405 90	15.51.30
0406 10	15.51.40
0406 10	15.51.40
0406 20	15.51.40
0406 20	15.51.40
0406 30	15.51.40
0406 30	15.51.40
0406 30	15.51.40
0406 30	15.51.40
0406 40	15.51.40
0406 40	15.51.40
0406 40	15.51.40
0406 90	15.51.40
0406 90	15.51.40
0406 90	15.51.40
0406 90	15.51.40
0406 90	15.51.40
0406 90	15.51.40
0406 90	15.51.40
0406 90	15.51.40
0406 90	15.51.40
0406 90	15.51.40
0406 90	15.51.40
0406 90	15.51.40
0406 90	15.51.40
0406 90	15.51.40
0406 90	15.51.40
0406 90	15.51.40
0406 90	15.51.40
0406 90	15.51.40
0406 90	15.51.40
0406 90	15.51.40
0406 90	15.51.40
0406 90	15.51.40
0406 90	15.51.40
0406 90	15.51.40
0406 90	15.51.40
0406 90	15.51.40
0406 90	15.51.40
0406 90	15.51.40
0406 90	15.51.40
0406 90	15.51.40
0406 90	15.51.40
0406 90	15.51.40
0406 90	15.51.40
0406 90	15.51.40
0406 90	15.51.40
0406 90	15.51.40
0406 90	15.51.40
0406 90	15.51.40
0406 90	15.51.40
0406 90	15.51.40
0406 90	15.51.40
0406 90	15.51.40
0407 00	01.24.20
0407 00	01.24.20
0407 00	01.24.20
0407 00	01.24.20
0408 11	15.89.12
0408 11	15.89.12
0408 19	15.89.12
0408 19	15.89.12
0408 19	15.89.12
0408 91	15.89.12
0408 91	15.89.12
0408 99	15.89.12
0408 99	15.89.12
0409 00	01.25.21
0410 00	01.25.23
0501 00	93.02.10
0502 10	15.11.40
0502 90	15.11.40
0503 00	01.22.32
0504 00	15.11.40
0505 10	15.12.20
0505 10	15.12.20
0505 90	15.12.20
0506 10	15.11.40
0506 90	15.11.40
0507 10	15.11.40
0507 90	15.11.40
0508 00	05.00.31
0509 00	05.00.32
0509 00	05.00.32
0510 00	15.11.40
0510 00	15.11.40
0511 10	01.21.30
0511 91	15.20.18
0511 91	15.20.18
0511 99	15.11.40
0511 99	15.11.40
0511 99	15.11.40
0601 10	01.12.21
0601 10	01.12.21
0601 10	01.12.21
0601 10	01.12.21
0601 10	01.12.21
0601 20	01.12.21
0601 20	01.12.21
0601 20	01.12.21
0602 10	01.12.21
0602 10	01.12.21
0602 20	01.12.21
0602 20	01.12.21
0602 30	01.12.21
0602 40	01.12.21
0602 40	01.12.21
0602 90	01.12.21
0602 90	01.12.21
0602 90	01.12.21
0602 90	01.12.21
0602 90	01.12.21
0602 90	01.12.21
0602 90	01.12.21
0602 90	01.12.21
0602 90	01.12.21
0602 90	01.12.21
0602 90	01.12.21
0603 10	01.12.22
0603 10	01.12.22
0603 10	01.12.22
0603 10	01.12.22
0603 10	01.12.22
0603 10	01.12.22
0603 10	01.12.22
0603 10	01.12.22
0603 10	01.12.22
0603 10	01.12.22
0603 10	01.12.22
0603 10	01.12.22
0603 90	01.12.22
0604 10	02.01.41
0604 10	02.01.41
0604 91	02.01.41
0604 91	02.01.41
0604 91	02.01.41
0604 91	02.01.41
0604 91	02.01.41
0604 99	02.01.41
0604 99	02.01.41
0701 10	01.11.21
0701 90	01.11.21
0701 90	01.11.21
0701 90	01.11.21
0701 90	01.11.21
0702 00	01.12.12
0702 00	01.12.12
0702 00	01.12.12
0702 00	01.12.12
0702 00	01.12.12
0702 00	01.12.12
0702 00	01.12.12
0702 00	01.12.12
0703 10	01.12.11
0703 10	01.12.11
0703 10	01.12.11
0703 20	01.12.11
0703 90	01.12.11
0704 10	01.12.13
0704 10	01.12.13
0704 10	01.12.13
0704 20	01.12.13
0704 90	01.12.13
0704 90	01.12.13
0705 11	01.12.13
0705 11	01.12.13
0705 11	01.12.13
0705 19	01.12.13
0705 21	01.12.13
0705 29	01.12.13
0706 10	01.12.11
0706 90	01.12.11
0706 90	01.12.11
0706 90	01.12.11
0706 90	01.12.11
0706 90	01.12.11
0707 00	01.12.12
0707 00	01.12.12
0707 00	01.12.12
0707 00	01.12.12
0707 00	01.12.12
0707 00	01.12.12
0707 00	01.12.12
0707 00	01.12.12
0708 10	01.12.12
0708 10	01.12.12
0708 10	01.12.12
0708 20	01.12.12
0708 20	01.12.12
0708 20	01.12.12
0708 90	01.12.12
0709 10	01.12.13
0709 10	01.12.13
0709 10	01.12.13
0709 10	01.12.13
0709 20	01.12.13
0709 30	01.12.13
0709 40	01.12.13
0709 51	01.12.13
0709 51	01.12.13
0709 51	01.12.13
0709 51	01.12.13
0709 52	01.12.13
0709 60	01.12.13
0709 60	01.12.13
0709 60	01.12.13
0709 60	01.12.13
0709 70	01.12.13
0709 90	01.12.13
0709 90	01.12.13
0709 90	01.13.24
0709 90	01.13.24
0709 90	01.12.13
0709 90	01.12.13
0709 90	01.12.13
0709 90	01.12.13
0709 90	01.12.13
0709 90	01.12.13
0709 90	01.12.13
0709 90	01.12.13
0709 90	01.12.13
0710 10	15.31.11
0710 21	15.33.11
0710 22	15.33.11
0710 29	15.33.11
0710 30	15.33.11
0710 40	15.33.11
0710 80	15.33.11
0710 80	15.33.11
0710 80	15.33.11
0710 80	15.33.11
0710 80	15.33.11
0710 80	15.33.11
0710 80	15.33.11
0710 80	15.33.11
0710 80	15.33.11
0710 90	15.33.11
0711 10	15.33.12
0711 20	15.33.12
0711 20	15.33.12
0711 30	15.33.12
0711 40	15.33.12
0711 90	15.33.12
0711 90	15.33.12
0711 90	15.33.12
0711 90	15.33.12
0711 90	15.33.12
0711 90	15.33.12
0712 20	15.33.13
0712 30	15.33.13
0712 90	15.31.12
0712 90	15.33.13
0712 90	15.33.13
0712 90	15.33.13
0712 90	15.33.13
0712 90	15.33.13
0713 10	01.11.22
0713 10	01.11.22
0713 20	01.11.22
0713 20	01.11.22
0713 31	01.11.22
0713 31	01.11.22
0713 32	01.11.22
0713 32	01.11.22
0713 33	01.11.22
0713 33	01.11.22
0713 39	01.11.22
0713 39	01.11.22
0713 40	01.11.22
0713 40	01.11.22
0713 50	01.11.22
0713 50	01.11.22
0713 90	01.11.22
0713 90	01.11.22
0714 10	01.11.23
0714 10	01.11.23
0714 10	01.11.23
0714 20	01.11.23
0714 20	01.11.23
0714 90	01.11.23
0714 90	01.11.23
0714 90	01.11.23
0801 11	01.13.21
0801 19	01.13.21
0801 21	01.13.21
0801 22	01.13.21
0801 31	01.13.21
0801 32	01.13.21
0802 11	01.13.24
0802 11	01.13.24
0802 12	01.13.24
0802 12	01.13.24
0802 21	01.13.24
0802 22	01.13.24
0802 31	01.13.24
0802 32	01.13.24
0802 40	01.13.24
0802 50	01.13.24
0802 90	01.13.24
0802 90	01.13.24
0802 90	01.13.24
0802 90	01.13.24
0802 90	01.13.24
0803 00	01.13.21
0803 00	01.13.21
0803 00	01.13.21
0804 10	01.13.21
0804 20	01.13.21
0804 20	01.13.21
0804 30	01.13.21
0804 40	01.13.21
0804 40	01.13.21
0804 40	01.13.21
0804 50	01.13.21
0805 10	01.13.22
0805 10	01.13.22
0805 10	01.13.22
0805 10	01.13.22
0805 10	01.13.22
0805 10	01.13.22
0805 10	01.13.22
0805 10	01.13.22
0805 10	01.13.22
0805 10	01.13.22
0805 10	01.13.22
0805 10	01.13.22
0805 10	01.13.22
0805 10	01.13.22
0805 10	01.13.22
0805 10	01.13.22
0805 10	01.13.22
0805 10	01.13.22
0805 10	01.13.22
0805 10	01.13.22
0805 10	01.13.22
0805 10	01.13.22
0805 10	01.13.22
0805 10	01.13.22
0805 10	01.13.22
0805 10	01.13.22
0805 10	01.13.22
0805 20	01.13.22
0805 20	01.13.22
0805 20	01.13.22
0805 20	01.13.22
0805 20	01.13.22
0805 20	01.13.22
0805 20	01.13.22
0805 20	01.13.22
0805 20	01.13.22
0805 20	01.13.22
0805 20	01.13.22
0805 20	01.13.22
0805 20	01.13.22
0805 20	01.13.22
0805 20	01.13.22
0805 30	01.13.22
0805 30	01.13.22
0805 30	01.13.22
0805 30	01.13.22
0805 40	01.13.22
0805 40	01.13.22
0805 40	01.13.22
0805 90	01.13.22
0806 10	01.13.11
0806 10	01.13.11
0806 10	01.13.11
0806 10	01.13.11
0806 10	01.13.11
0806 10	01.13.11
0806 10	01.13.11
0806 10	01.13.12
0806 10	01.13.12
0806 10	01.13.12
0806 20	15.33.25
0806 20	15.33.25
0806 20	15.33.25
0806 20	15.33.25
0806 20	15.33.25
0806 20	15.33.25
0807 11	01.12.12
0807 19	01.12.12
0807 20	01.13.23
0808 10	01.13.23
0808 10	01.13.23
0808 10	01.13.23
0808 10	01.13.23
0808 10	01.13.23
0808 10	01.13.23
0808 10	01.13.23
0808 10	01.13.23
0808 10	01.13.23
0808 10	01.13.23
0808 10	01.13.23
0808 10	01.13.23
0808 10	01.13.23
0808 20	01.13.23
0808 20	01.13.23
0808 20	01.13.23
0808 20	01.13.23
0808 20	01.13.23
0808 20	01.13.23
0808 20	01.13.23
0808 20	01.13.23
0808 20	01.13.23
0809 10	01.13.23
0809 10	01.13.23
0809 10	01.13.23
0809 10	01.13.23
0809 10	01.13.23
0809 20	01.13.23
0809 20	01.13.23
0809 20	01.13.23
0809 20	01.13.23
0809 20	01.13.23
0809 20	01.13.23
0809 20	01.13.23
0809 20	01.13.23
0809 20	01.13.23
0809 20	01.13.23
0809 20	01.13.23
0809 20	01.13.23
0809 20	01.13.23
0809 20	01.13.23
0809 30	01.13.23
0809 30	01.13.23
0809 30	01.13.23
0809 30	01.13.23
0809 30	01.13.23
0809 30	01.13.23
0809 30	01.13.23
0809 30	01.13.23
0809 30	01.13.23
0809 30	01.13.23
0809 40	01.13.23
0809 40	01.13.23
0809 40	01.13.23
0809 40	01.13.23
0809 40	01.13.23
0810 10	01.13.23
0810 10	01.13.23
0810 10	01.13.23
0810 20	01.13.23
0810 20	01.13.23
0810 30	01.13.23
0810 30	01.13.23
0810 30	01.13.23
0810 40	01.13.23
0810 40	01.13.23
0810 40	01.13.23
0810 40	01.13.23
0810 50	01.13.23
0810 90	01.13.23
0810 90	01.13.23
0810 90	01.13.23
0811 10	15.33.21
0811 10	15.33.21
0811 10	15.33.21
0811 20	15.33.21
0811 20	15.33.21
0811 20	15.33.21
0811 20	15.33.21
0811 20	15.33.21
0811 20	15.33.21
0811 20	15.33.21
0811 90	15.33.21
0811 90	15.33.21
0811 90	15.33.21
0811 90	15.33.21
0811 90	15.33.21
0811 90	15.33.21
0811 90	15.33.21
0811 90	15.33.21
0811 90	15.33.21
0811 90	15.33.21
0812 10	15.33.24
0812 20	15.33.24
0812 90	15.33.24
0812 90	15.33.24
0812 90	15.33.24
0812 90	15.33.24
0812 90	15.33.24
0812 90	15.33.24
0812 90	15.33.24
0812 90	15.33.24
0813 10	15.33.25
0813 20	15.33.25
0813 30	15.33.25
0813 40	15.33.25
0813 40	15.33.25
0813 40	15.33.25
0813 40	15.33.25
0813 40	15.33.25
0813 40	15.33.25
0813 50	15.33.25
0813 50	15.33.25
0813 50	15.33.25
0813 50	15.33.25
0813 50	15.33.25
0813 50	15.33.25
0813 50	15.33.25
0814 00	15.33.25
0901 11	01.13.31
0901 12	15.86.11
0901 21	15.86.11
0901 22	15.86.11
0901 90	15.86.12
0901 90	15.86.12
0901 90	15.86.12
0901 90	15.86.12
0902 10	15.86.13
0902 20	01.13.32
0902 30	15.86.13
0902 40	01.13.32
0903 00	01.13.33
0904 11	01.13.40
0904 11	01.13.40
0904 11	15.87.20
0904 11	15.87.20
0904 11	01.13.40
0904 11	01.13.40
0904 11	15.87.20
0904 11	15.87.20
0904 12	01.13.40
0904 12	01.13.40
0904 12	15.87.20
0904 12	15.87.20
0904 20	01.13.40
0904 20	01.13.40
0904 20	15.87.20
0904 20	15.87.20
0904 20	01.13.40
0904 20	01.13.40
0904 20	15.87.20
0904 20	15.87.20
0904 20	01.13.40
0904 20	01.13.40
0904 20	15.87.20
0904 20	15.87.20
0904 20	01.13.40
0904 20	01.13.40
0904 20	15.87.20
0904 20	15.87.20
0904 20	01.13.40
0904 20	01.13.40
0904 20	15.87.20
0904 20	15.87.20
0905 00	01.13.40
0905 00	01.13.40
0905 00	15.87.20
0905 00	15.87.20
0906 10	01.13.40
0906 10	01.13.40
0906 10	15.87.20
0906 10	15.87.20
0906 20	01.13.40
0906 20	01.13.40
0906 20	15.87.20
0906 20	15.87.20
0907 00	01.13.40
0907 00	01.13.40
0907 00	15.87.20
0907 00	15.87.20
0908 10	01.13.40
0908 10	01.13.40
0908 10	15.87.20
0908 10	15.87.20
0908 10	01.13.40
0908 10	01.13.40
0908 10	15.87.20
0908 10	15.87.20
0908 20	01.13.40
0908 20	01.13.40
0908 20	15.87.20
0908 20	15.87.20
0908 20	01.13.40
0908 20	01.13.40
0908 20	15.87.20
0908 20	15.87.20
0908 30	01.13.40
0908 30	01.13.40
0908 30	15.87.20
0908 30	15.87.20
0909 10	01.13.40
0909 10	01.13.40
0909 10	15.87.20
0909 10	15.87.20
0909 10	01.13.40
0909 10	01.13.40
0909 10	15.87.20
0909 10	15.87.20
0909 20	01.13.40
0909 20	01.13.40
0909 20	15.87.20
0909 20	15.87.20
0909 30	01.13.40
0909 30	01.13.40
0909 30	15.87.20
0909 30	15.87.20
0909 30	01.13.40
0909 30	01.13.40
0909 30	15.87.20
0909 30	15.87.20
0909 30	01.13.40
0909 30	01.13.40
0909 30	15.87.20
0909 30	15.87.20
0909 40	01.13.40
0909 40	01.13.40
0909 40	15.87.20
0909 40	15.87.20
0909 40	01.13.40
0909 40	01.13.40
0909 40	15.87.20
0909 40	15.87.20
0909 40	01.13.40
0909 40	01.13.40
0909 40	15.87.20
0909 40	15.87.20
0909 50	01.13.40
0909 50	01.13.40
0909 50	15.87.20
0909 50	15.87.20
0909 50	01.13.40
0909 50	01.13.40
0909 50	15.87.20
0909 50	15.87.20
0909 50	01.13.40
0909 50	01.13.40
0909 50	15.87.20
0909 50	15.87.20
0910 10	01.13.40
0910 10	01.13.40
0910 10	15.87.20
0910 10	15.87.20
0910 10	01.13.40
0910 10	01.13.40
0910 10	15.87.20
0910 10	15.87.20
0910 10	01.13.40
0910 10	01.13.40
0910 10	15.87.20
0910 10	15.87.20
0910 20	01.13.40
0910 20	01.13.40
0910 20	15.87.20
0910 20	15.87.20
0910 20	01.13.40
0910 20	01.13.40
0910 20	15.87.20
0910 20	15.87.20
0910 30	01.13.40
0910 30	01.13.40
0910 30	15.87.20
0910 30	15.87.20
0910 40	01.13.40
0910 40	01.13.40
0910 40	15.87.20
0910 40	15.87.20
0910 40	01.13.40
0910 40	01.13.40
0910 40	15.87.20
0910 40	15.87.20
0910 40	01.13.40
0910 40	01.13.40
0910 40	15.87.20
0910 40	15.87.20
0910 40	01.13.40
0910 40	01.13.40
0910 40	15.87.20
0910 40	15.87.20
0910 50	01.13.40
0910 50	01.13.40
0910 50	15.87.20
0910 50	15.87.20
0910 91	01.13.40
0910 91	01.13.40
0910 91	15.87.20
0910 91	15.87.20
0910 91	01.13.40
0910 91	01.13.40
0910 91	15.87.20
0910 91	15.87.20
0910 99	01.13.40
0910 99	01.13.40
0910 99	15.87.20
0910 99	15.87.20
0910 99	01.13.40
0910 99	01.13.40
0910 99	15.87.20
0910 99	15.87.20
0910 99	01.13.40
0910 99	01.13.40
0910 99	15.87.20
0910 99	15.87.20
1001 10	01.11.11
1001 90	01.11.12
1001 90	01.11.12
1001 90	01.11.12
1002 00	01.11.16
1003 00	01.11.15
1003 00	01.11.15
1004 00	01.11.16
1005 10	01.11.13
1005 10	01.11.13
1005 10	01.11.13
1005 10	01.11.13
1005 10	01.11.13
1005 90	01.11.13
1006 10	01.11.14
1006 10	01.11.14
1006 10	01.11.14
1006 10	01.11.14
1006 10	01.11.14
1006 10	01.11.14
1006 10	01.11.14
1006 10	01.11.14
1006 10	01.11.14
1006 20	15.61.10
1006 20	15.61.10
1006 20	15.61.10
1006 20	15.61.10
1006 20	15.61.10
1006 20	15.61.10
1006 20	15.61.10
1006 20	15.61.10
1006 30	15.61.40
1006 30	15.61.40
1006 30	15.61.40
1006 30	15.61.40
1006 30	15.61.40
1006 30	15.61.40
1006 30	15.61.40
1006 30	15.61.40
1006 30	15.61.40
1006 30	15.61.40
1006 30	15.61.40
1006 30	15.61.40
1006 30	15.61.40
1006 30	15.61.40
1006 30	15.61.40
1006 30	15.61.40
1006 40	15.61.40
1007 00	01.11.17
1007 00	01.11.17
1008 10	01.11.17
1008 20	01.11.17
1008 30	01.11.17
1008 90	01.11.17
1008 90	01.11.17
1101 00	15.61.21
1101 00	15.61.21
1101 00	15.61.21
1102 10	15.61.22
1102 20	15.61.22
1102 20	15.61.22
1102 30	15.61.22
1102 90	15.61.22
1102 90	15.61.22
1102 90	15.61.22
1103 11	15.61.31
1103 11	15.61.31
1103 12	15.61.32
1103 13	15.61.32
1103 13	15.61.32
1103 14	15.61.32
1103 19	15.61.32
1103 19	15.61.32
1103 19	15.61.32
1103 21	15.61.31
1103 29	15.61.32
1103 29	15.61.32
1103 29	15.61.32
1103 29	15.61.32
1103 29	15.61.32
1103 29	15.61.32
1104 11	15.61.33
1104 11	15.61.33
1104 12	15.61.33
1104 12	15.61.33
1104 19	15.61.33
1104 19	15.61.33
1104 19	15.61.33
1104 19	15.61.33
1104 19	15.61.33
1104 21	15.61.33
1104 21	15.61.33
1104 21	15.61.33
1104 21	15.61.33
1104 21	15.61.33
1104 22	15.61.33
1104 22	15.61.33
1104 22	15.61.33
1104 22	15.61.33
1104 22	15.61.33
1104 22	15.61.33
1104 23	15.61.33
1104 23	15.61.33
1104 23	15.61.33
1104 23	15.61.33
1104 29	15.61.33
1104 29	15.61.33
1104 29	15.61.33
1104 29	15.61.33
1104 29	15.61.33
1104 29	15.61.33
1104 29	15.61.33
1104 29	15.61.33
1104 29	15.61.33
1104 29	15.61.33
1104 29	15.61.33
1104 29	15.61.33
1104 30	15.61.33
1104 30	15.61.33
1105 10	15.31.12
1105 20	15.31.12
1106 10	15.61.23
1106 20	15.61.23
1106 20	15.61.23
1106 30	15.61.23
1106 30	15.61.23
1107 10	15.97.10
1107 10	15.97.10
1107 10	15.97.10
1107 10	15.97.10
1107 20	15.97.10
1108 11	15.62.22
1108 12	15.62.22
1108 13	15.62.22
1108 14	15.62.22
1108 19	15.62.22
1108 19	15.62.22
1108 20	15.62.22
1109 00	15.62.22
1201 00	01.11.31
1201 00	01.11.31
1202 10	01.11.32
1202 10	01.11.32
1202 20	01.11.32
1203 00	01.11.35
1204 00	01.11.35
1204 00	01.11.35
1205 00	01.11.33
1205 00	01.11.33
1206 00	01.11.33
1206 00	01.11.33
1206 00	01.11.33
1207 10	01.11.35
1207 10	01.11.35
1207 20	01.11.34
1207 20	01.11.34
1207 30	01.11.35
1207 30	01.11.35
1207 40	01.11.33
1207 40	01.11.33
1207 50	01.11.33
1207 50	01.11.33
1207 60	01.11.33
1207 60	01.11.33
1207 91	01.11.35
1207 91	01.11.35
1207 92	01.11.35
1207 92	01.11.35
1207 99	01.11.35
1207 99	01.11.35
1207 99	01.11.35
1208 10	15.41.32
1208 90	15.41.32
1209 11	01.11.92
1209 19	01.12.24
1209 21	01.11.92
1209 22	01.11.92
1209 22	01.11.92
1209 23	01.11.92
1209 23	01.11.92
1209 23	01.11.92
1209 24	01.11.92
1209 25	01.11.92
1209 25	01.11.92
1209 26	01.11.92
1209 29	01.11.92
1209 29	01.11.92
1209 29	01.11.92
1209 30	01.12.23
1209 91	01.12.24
1209 91	01.12.24
1209 99	01.12.23
1209 99	01.12.23
1209 99	01.12.23
1210 10	01.11.93
1210 20	01.11.93
1210 20	01.11.93
1211 10	01.11.91
1211 20	01.11.91
1211 90	01.11.91
1211 90	01.11.91
1211 90	01.11.91
1211 90	01.11.91
1211 90	15.86.15
1211 90	15.86.15
1211 90	01.11.91
1211 90	01.11.91
1211 90	15.86.15
1211 90	15.86.15
1211 90	01.11.91
1211 90	01.11.91
1211 90	15.86.15
1211 90	15.86.15
1211 90	15.86.15
1211 90	15.86.15
1211 90	01.11.91
1211 90	01.11.91
1211 90	15.86.15
1211 90	15.86.15
1212 10	01.13.23
1212 10	01.13.23
1212 10	01.13.23
1212 20	05.00.33
1212 30	15.33.26
1212 91	01.11.51
1212 91	01.11.51
1212 92	01.11.52
1212 99	01.11.93
1212 99	01.11.93
1213 00	01.11.60
1214 10	15.71.20
1214 90	01.11.60
1214 90	01.11.60
1214 90	01.11.60
1301 10	02.01.22
1301 20	02.01.22
1301 90	02.01.22
1301 90	02.01.22
1302 11	15.89.20
1302 12	15.89.20
1302 13	15.89.20
1302 14	15.89.20
1302 19	15.89.20
1302 19	15.89.20
1302 19	15.89.20
1302 19	15.89.20
1302 19	15.89.20
1302 20	15.89.20
1302 20	15.89.20
1302 31	15.89.20
1302 32	15.89.20
1302 32	15.89.20
1302 39	15.89.20
1401 10	02.01.42
1401 20	02.01.42
1401 90	02.01.42
1402 10	02.01.42
1402 10	02.01.42
1402 10	02.01.42
1402 90	02.01.42
1403 10	02.01.42
1403 90	02.01.42
1404 10	02.01.42
1404 20	15.41.20
1404 90	02.01.42
1501 00	15.11.30
1501 00	15.11.30
1501 00	15.11.30
1502 00	15.11.30
1502 00	15.11.30
1503 00	15.41.11
1503 00	15.41.11
1503 00	15.41.11
1503 00	15.41.11
1504 10	15.41.11
1504 10	15.41.11
1504 10	15.41.11
1504 20	15.41.11
1504 20	15.41.11
1504 30	15.41.11
1504 30	15.41.11
1504 30	15.41.11
1505 10	17.10.10
1505 90	17.10.10
1506 00	15.41.11
1507 10	15.41.12
1507 10	15.41.12
1507 90	15.42.11
1507 90	15.42.11
1508 10	15.41.12
1508 10	15.41.12
1508 90	15.42.11
1508 90	15.42.11
1509 10	15.41.12
1509 10	15.41.12
1509 90	15.42.11
1510 00	15.42.11
1510 00	15.42.11
1511 10	15.41.13
1511 10	15.41.13
1511 90	15.42.12
1511 90	15.42.12
1511 90	15.42.12
1511 90	15.42.12
1512 11	15.41.12
1512 11	15.41.12
1512 11	15.41.12
1512 19	15.42.11
1512 19	15.42.11
1512 19	15.42.11
1512 21	15.41.12
1512 21	15.41.12
1512 29	15.42.11
1512 29	15.42.11
1513 11	15.41.13
1513 11	15.41.13
1513 11	15.41.13
1513 19	15.42.12
1513 19	15.42.12
1513 19	15.42.12
1513 19	15.42.12
1513 19	15.42.12
1513 21	15.41.13
1513 21	15.41.13
1513 21	15.41.13
1513 21	15.41.13
1513 29	15.42.12
1513 29	15.42.12
1513 29	15.42.12
1513 29	15.42.12
1513 29	15.42.12
1513 29	15.42.12
1514 10	15.41.12
1514 10	15.41.12
1514 90	15.42.11
1514 90	15.42.11
1515 11	15.41.13
1515 19	15.42.12
1515 19	15.42.12
1515 21	15.62.10
1515 21	15.62.10
1515 29	15.62.10
1515 29	15.62.10
1515 30	15.42.12
1515 30	15.42.12
1515 40	15.42.12
1515 50	15.42.11
1515 50	15.42.11
1515 50	15.42.11
1515 50	15.42.11
1515 60	15.42.12
1515 60	15.42.12
1515 90	15.42.12
1515 90	15.42.12
1515 90	15.42.12
1515 90	15.42.12
1515 90	15.42.12
1515 90	15.42.12
1515 90	15.42.12
1515 90	15.42.12
1515 90	15.42.12
1515 90	15.42.12
1515 90	15.42.12
1516 10	15.42.13
1516 10	15.42.13
1516 20	15.42.13
1516 20	15.42.13
1516 20	15.42.13
1516 20	15.42.13
1516 20	15.42.13
1517 10	15.43.10
1517 10	15.43.10
1517 90	15.43.10
1517 90	15.43.10
1517 90	15.43.10
1517 90	15.43.10
1518 00	24.66.10
1518 00	24.66.10
1518 00	24.66.10
1518 00	24.66.10
1518 00	24.66.10
1518 00	24.66.10
1520 00	24.51.10
1521 10	15.42.20
1521 10	15.42.20
1521 90	01.25.25
1521 90	01.25.25
1521 90	01.25.25
1522 00	15.42.20
1522 00	15.42.20
1522 00	15.42.20
1522 00	15.42.20
1522 00	15.42.20
1601 00	15.13.12
1601 00	15.13.12
1601 00	15.13.12
1602 10	15.88.10
1602 20	15.13.12
1602 20	15.13.12
1602 20	15.13.12
1602 31	15.13.12
1602 31	15.13.12
1602 31	15.13.12
1602 31	15.13.12
1602 32	15.13.12
1602 32	15.13.12
1602 32	15.13.12
1602 32	15.13.12
1602 39	15.13.12
1602 39	15.13.12
1602 39	15.13.12
1602 39	15.13.12
1602 41	15.13.12
1602 41	15.13.12
1602 42	15.13.12
1602 42	15.13.12
1602 49	15.13.12
1602 49	15.13.12
1602 49	15.13.12
1602 49	15.13.12
1602 49	15.13.12
1602 49	15.13.12
1602 49	15.13.12
1602 50	15.13.12
1602 50	15.13.12
1602 50	15.13.12
1602 50	15.13.12
1602 90	15.13.12
1602 90	15.13.12
1602 90	15.13.12
1602 90	15.13.12
1602 90	15.13.12
1602 90	15.13.12
1602 90	15.13.12
1602 90	15.13.12
1602 90	15.13.12
1602 90	15.13.12
1602 90	15.13.12
1603 00	15.13.12
1603 00	15.13.12
1603 00	15.13.12
1604 11	15.20.14
1604 12	15.20.14
1604 12	15.20.14
1604 12	15.20.14
1604 13	15.20.14
1604 13	15.20.14
1604 13	15.20.14
1604 14	15.20.14
1604 14	15.20.14
1604 14	15.20.14
1604 14	15.20.14
1604 14	15.20.14
1604 15	15.20.14
1604 15	15.20.14
1604 15	15.20.14
1604 16	15.20.14
1604 19	15.20.14
1604 19	15.20.14
1604 19	15.20.14
1604 19	15.20.14
1604 19	15.20.14
1604 19	15.20.14
1604 19	15.20.14
1604 19	15.20.14
1604 19	15.20.14
1604 19	15.20.14
1604 20	15.20.14
1604 20	15.20.14
1604 20	15.20.14
1604 20	15.20.14
1604 20	15.20.14
1604 20	15.20.14
1604 20	15.20.14
1604 30	15.20.14
1604 30	15.20.14
1605 10	15.20.16
1605 20	15.20.16
1605 20	15.20.16
1605 20	15.20.16
1605 30	15.20.16
1605 40	15.20.16
1605 90	15.20.16
1605 90	15.20.16
1605 90	15.20.16
1605 90	15.20.16
1701 11	15.83.11
1701 11	15.83.11
1701 12	15.83.11
1701 12	15.83.11
1701 91	15.83.13
1701 99	15.83.12
1701 99	15.83.12
1702 11	15.51.54
1702 19	15.51.54
1702 20	15.83.13
1702 20	15.83.13
1702 30	15.62.21
1702 30	15.62.21
1702 30	15.62.21
1702 30	15.62.21
1702 30	15.62.21
1702 40	15.62.21
1702 40	15.62.21
1702 50	15.62.21
1702 60	15.62.21
1702 60	15.62.21
1702 90	15.62.21
1702 90	15.62.21
1702 90	15.62.21
1702 90	15.62.21
1702 90	15.62.21
1702 90	15.62.21
1702 90	15.62.21
1702 90	15.62.21
1702 90	15.62.21
1703 10	15.83.14
1703 90	15.83.14
1704 10	15.84.23
1704 10	15.84.23
1704 10	15.84.23
1704 10	15.84.23
1704 90	15.84.23
1704 90	15.84.23
1704 90	15.84.23
1704 90	15.84.23
1704 90	15.84.23
1704 90	15.84.23
1704 90	15.84.23
1704 90	15.84.23
1704 90	15.84.23
1704 90	15.84.23
1801 00	01.13.34
1802 00	15.84.30
1803 10	15.84.11
1803 20	15.84.11
1804 00	15.84.12
1805 00	15.84.13
1806 10	15.84.14
1806 10	15.84.14
[truncated: 8,767 more rows]

## Sheet: HS2012ExConv
Commodity Code
101	0
104	7.7
105	7.64
106	7.68
201	6.06
202	6.06
203	8.95
204	7.7
206	11.1383
207	7.64
208	11.1383
209	30.42
210	11.1383
301	4.71
302	4.71
303	4.71
304	4.71
305	8.5
306	5.76
307	5.76
308	5.55143
401	7.74
402	11.08
403	3.36
404	11.6075
405	30.59
406	13.32
407	6.79
408	6.79
409	13.19
410	11.6075
501	0
502	0
504	0
505	0
507	0
508	0
511	0
601	17.3
602	0
603	17.3
604	17.3
701	3.05
702	0.92
703	2.7
704	1.04
705	0.56
706	1.17
707	0.67
708	2.64
709	2.71769
710	1.56
711	2.56
712	11.69
713	3.07
714	3.7
801	23.78
802	21.13
803	4.22
804	4.98
805	1.65
806	2.94
807	1.42
808	1.99
809	1.75
810	6.86167
811	3.9
812	3.9
813	10.68
814	6.86167
901	14.27
902	13.18
903	13.18
904	12.51
905	12.05
906	11.89
907	12.97
908	19.05
909	12.76
910	9.11
1001	12.71
1002	13.22
1003	14.56
1004	15.41
1005	14.02
1006	14.79
1007	14.2414
1008	14.98
1101	14.69
1102	14.75
1103	13.7
1104	14.7
1105	14.94
1106	14.74
1107	16.74
1108	15.5
1109	5.86
1201	16.32
1202	24.31
1204	22.34
1206	23.97
1207	19.44
1208	19.44
1209	0.96
1210	14.43
1211	3.35
1212	8.66
1213	18.98
1214	0.96
1301	19.91
1302	19.91
1401	19.91
1404	19.91
1501	30.42
1502	1.27277
1504	37.74
1505	32.7135
1507	37.04
1508	37.04
1509	37.66
1510	32.7135
1511	37.66
1512	37.04
1513	36.99
1514	37.66
1515	37.66
1516	32.7135
1517	25.94
1518	32.7135
1520	17.96
1521	39.31
1522	39.31
1601	10.91
1602	12.52
1603	0
1604	7.91
1605	8.32
1701	16.02
1702	16.02
1703	12.13
1704	14.7233
1801	16.65
1802	16.65
1803	16.65
1804	16.65
1805	16.65
1806	16.65
1901	16.74
1902	14.8
1903	10.31
1904	15.1925
1905	18.92
2001	0.54
2002	0.54
2003	0
2004	2.11
2005	2.11
2006	2.99667
2007	10.79
2008	2.99667
2009	1.89
2101	12.3
2102	10.79
2103	6.3
2104	1.88
2105	9.46
2106	8.146
2201	0
2202	1.21
2203	1.64
2204	3.31
2205	4.57
2206	3.64
2207	10
2208	10
2209	1.44
2301	20.09
2302	20.09
2303	20.09
2304	20.09
2306	20.09
2307	20.09
2308	20.09
2309	20.09
2401	0
2402	0
2403	0
2501	0.24
2502	11.91
2503	2.38
2504	34.16
2505	0.03
2506	0.03
2507	0.77
2508	0.77
2509	0.01
2510	0.06
2511	0.01
2512	0.03
2513	0.03
2514	0.03
2515	0.03
2516	0.03
2517	0.03
2518	0.01
2519	0.01
2520	0.05
2521	0.05
2522	1.97
2523	1.97
2525	0.03
2526	0.1
2528	1
2529	0.35
2530	2.07741
2601	0.42
2603	0.43
2604	0.39
2606	1.05
2607	0.23
2608	0.9
2609	0.19
2610	0.58
2611	0.2
2612	0.6
2613	0.22
2614	0.57
2615	0.664375
2616	0.29
2617	0.664375
2618	1.38
2619	1.38
2620	1.8
2621	0.664375
2701	29.892
2703	17.85
2704	28.896
2705	23.0365
2706	29.4
2707	41.808
2708	27.09
2709	45.8432
2710	47.4864
2711	48.0948
2712	45.5
2713	34.476
2714	25.532
2715	25.532
2716	3600
2801	3.83
2802	2.38
2803	34.16
2804	116.88
2805	0.58
2806	1.33
2807	1.11
2808	0.21
2809	2.09
2810	1
2811	7.97462
2812	7.97462
2813	7.97462
2814	19.84
2815	2.74
2816	2.26
2817	0.61
2818	1.97
2819	0.24
2820	0.52
2821	0.75
2822	0.63
2823	0.27
2824	0.21
2825	19.41
2826	12.27
2827	1.38
2828	1.38
2829	1.38
2830	2.38
2831	4.89
2832	3.11
2833	6.35
2834	2.09
2835	0.06
2836	0.41
2837	32.48
2839	0.54
2840	7.97462
2841	7.97462
2842	7.97462
2843	0.25
2844	5
2845	1.11
2846	7.97462
2847	7.97462
2848	7.97462
2849	22.91
2850	7.97462
2852	7.97462
2853	7.97462
2901	47.7239
2902	41.8566
2903	12.8735
2904	26.4226
2905	29.1422
2906	36.1708
2907	31.4718
2908	8.74719
2909	25.4581
2910	26.3601
2911	26.4226
2912	28.2611
2913	26.4226
2914	35.0447
2915	25.335
2916	26.9655
2917	17.4975
2918	13.7125
2919	26.4226
2920	26.4226
2921	37.0767
2922	25.5183
2923	26.4226
2924	19.0326
2925	26.4226
2926	24.7426
2927	26.4226
2928	26.4226
2929	26.4226
2930	26.174
2931	16.8114
2932	27.6928
2933	24.2224
2934	26.4226
2935	26.4226
2936	21.3014
2937	31.3726
2938	26.4226
2939	26.4226
2940	26.4226
2941	26.4226
2942	26.4226
3001	0
3002	0
3003	0
3004	0
3005	20.38
3006	0
3101	3.44
3102	3.68
3103	2.25
3104	4.39
3105	3.44
3201	31.16
3202	31.16
3203	31.16
3204	31.16
3205	31.16
3206	31.16
3207	31.16
3208	31.16
3209	31.16
3210	31.16
3211	31.16
3212	31.16
3213	31.16
3214	31.16
3215	31.16
3301	29.69
3302	0
3303	29.69
3304	0
3305	0
3306	0
3307	29.69
3401	44.27
3402	44.27
3403	41.81
3404	45.5
3405	44.27
3406	45.5
3407	0
3501	15.24
3502	3.76
3503	14.5
3504	13.986
3505	16.82
3506	0
3507	13.986
3601	0
3602	0
3603	0
3604	0
3605	19.61
3606	13.986
3701	34.52
3702	34.52
3703	15.06
3704	15.06
3705	34.52
3706	34.52
3707	0
3801	34.46
3802	34.46
3803	39.6
3804	20.15
3805	20.15
3806	20.15
3807	20.15
3808	23.33
3809	0
3810	0
3811	0
3812	0
3813	0
3814	0
3815	0
3816	0
3817	44.08
3818	0
3819	0
3820	23.96
3821	0
3822	0
3823	39.6
3824	28.9242
3825	28.9242
3826	27
3901	42.85
3902	46
3903	39.52
3904	20.85
3905	34.46
3906	34.46
3907	34.46
3908	34.46
3909	34.46
3910	34.46
3911	34.46
3912	34.46
3913	34.46
3914	34.46
3915	34.46
3916	34.46
3917	20.85
3918	20.85
3919	34.46
3920	34.46
3921	34.46
3922	20.85
3923	34.46
3924	23.09
3925	34.46
3926	34.46
4001	31.99
4002	31.99
4003	31.99
4005	31.99
4006	31.99
4007	31.99
4008	31.99
4009	31.99
4010	31.99
4011	31.99
4012	31.99
4013	31.99
4014	31.99
4015	31.99
4016	31.99
4017	31.99
4101	0
4102	0
4103	0
4104	0
4105	0
4106	0
4107	22.89
4112	22.89
4113	22.89
4114	22.89
4115	22.89
4201	22.89
4202	22.89
4203	22.89
4205	22.89
4206	0
4301	0
4302	22.89
4303	22.89
4304	22.89
4401	19.61
4402	19.61
4403	19.61
4404	19.61
4405	19.61
4407	19.61
4408	19.61
4409	19.61
4410	19.61
4411	19.61
4412	19.61
4413	19.61
4414	19.61
4415	19.61
4416	19.61
4417	19.61
4418	19.61
4419	19.61
4420	19.61
4421	19.61
4501	17.3
4502	17.3
4503	17.3
4504	17.3
4601	17.3
4602	17.3
4701	19.61
4702	19.61
4703	19.61
4704	19.61
4705	19.61
4706	19.61
4707	15.06
4801	15.06
4802	15.06
4803	15.06
4804	15.06
4805	15.06
4806	15.06
4807	15.06
4808	15.06
4809	15.06
4810	15.06
4811	15.06
4812	15.06
4813	15.06
4814	15.06
4816	15.06
4817	15.06
4818	15.06
4819	15.06
4820	15.06
4821	15.06
4822	15.06
4823	15.06
4901	15.06
4902	15.06
4903	15.06
4904	15.06
4905	15.06
4906	15.06
4907	15.06
4908	15.06
4909	15.06
4910	15.06
4911	15.06
5001	0
5002	21.02
5003	21.02
5004	21.02
5006	21.02
5007	21.02
5101	22.28
5102	22.28
5105	22.28
5106	22.28
5107	22.28
5109	22.28
5111	22.28
5112	22.28
5113	22.28
5201	17.08
5202	17.08
5203	17.08
5204	17.08
5205	17.08
5206	17.08
5207	17.08
5208	17.08
5209	17.08
5210	17.08
5211	17.08
5212	17.08
5301	17.3
5303	17.3
5305	17.3
5306	17.3
5307	17.3
5308	17.3
5309	17.3
5310	17.3
5311	17.3
5401	23.67
5402	23.67
5403	23.67
5404	23.67
5405	23.67
5406	23.67
5407	23.67
5408	23.67
5501	23.67
5502	23.67
5503	23.67
5504	23.67
5506	23.67
5507	23.67
5508	23.67
5509	23.67
5510	23.67
5511	23.67
5512	23.67
5513	23.67
5514	23.67
5515	23.67
5516	23.67
5601	17.08
5602	22.28
5603	23.67
5604	31.99
5605	25.57
5606	25.57
5607	34.73
5608	23.67
5609	25.57
5701	22.28
5702	22.28
5703	22.97
5704	22.51
5705	22.51
5801	19.718
5802	17.08
5803	17.08
5804	23.67
5805	19.718
5806	20.38
5807	19.718
5808	19.718
5809	19.718
5810	20.38
5811	19.718
5901	23.67
5902	23.67
5903	20.85
5904	19.33
5905	23.67
5906	27.83
5907	23.17
5908	23.17
5909	23.17
5910	23.17
5911	23.17
6001	19.68
6002	20.52
6003	21.01
6004	20.52
6005	20.38
6006	21.01
6101	20.38
6102	21.01
6103	21.01
6104	21.01
6105	20.38
6106	20.38
6107	20.38
6108	20.38
6109	20.38
6110	21.01
6111	20.38
6112	20.38
6113	20.632
6114	20.38
6115	21.01
6116	21.01
6117	20.632
6201	20.38
6202	20.38
6203	20.38
6204	20.38
6205	20.38
6206	20.38
6207	20.38
6208	20.38
6209	20.38
6210	20.38
6211	20.38
6212	20.38
6213	20.38
6214	21.01
6215	20.425
6216	20.425
6217	20.425
6301	21.01
6302	20.38
6303	20.38
6304	20.38
6305	21.164
6306	23.67
6307	21.164
6308	21.164
6309	21.164
6310	21.164
6401	33.23
6402	33.23
6403	33.23
6404	33.23
6405	33.23
6406	33.23
6501	28.85
6502	28.85
6504	28.85
6505	28.85
6506	28.85
6507	28.85
6601	29.07
6602	29.07
6603	29.07
6701	0
6702	29.07
6703	0
6704	0
6801	8.4075
6802	0.03
6803	0.03
6804	0.03
6805	31.42
6806	1.97
6807	25.53
6808	19.91
6809	19.91
6810	1.97
6811	0.03
6812	0.03
6813	8.4075
6814	0.03
6815	8.4075
6901	0.14
6902	0.14
6903	0.14
6904	0.14
6905	0.14
6906	0.14
6907	0.14
6908	0.14
6909	0.14
6910	0.14
6911	0.14
6912	0.14
6913	0.14
6914	0.14
7001	0.14
7002	0.14
7003	0.14
7004	0.14
7005	0.14
7006	0.14
7007	0.14
7008	0.14
7009	0.14
7010	0.14
7011	0.14
7013	0.14
7014	0.14
7015	0.14
7016	0.14
7017	0.14
7018	0.14
7019	0.14
7020	0.14
7101	0
7102	0
7103	0
7104	0
7105	0
7106	0
7107	0
7108	0
7109	0
7110	0
7111	0
7112	0
7113	0
7114	0
7115	0
7116	0
7117	0
7118	0
7201	8
7202	8
7203	8
7204	8
7205	8
7206	8
7207	8
7208	8
7209	8
7210	8
7211	8
7212	8
7213	8
7214	8
7215	8
7216	8
7217	8
7218	6.75
7219	6.75
7220	6.75
7221	6.75
7222	6.75
7223	6.75
7224	6.75
7225	6.75
7226	6.75
7227	6.75
7228	6.75
7229	6.75
7301	6.75
7302	6.75
7303	8
7304	8
7305	8
7306	8
7307	8
7308	8
7309	8
7310	8
7311	8
7312	8
7313	8
7314	8
7315	8
7316	8
7317	8
7318	8
7319	8
7320	8
7321	8
7322	8
7323	8
7324	8
7325	8
7326	8
7401	2.11
7402	2.11
7403	2.11
7404	2.11
7405	2.11
7406	2.11
7407	2.11
7408	2.11
7409	2.11
7410	2.11
7411	2.11
7412	2.11
7413	2.11
7415	2.11
7418	2.11
7419	2.11
7501	3.96
7502	3.96
7503	3.96
7504	3.96
7505	3.96
7506	3.96
7507	3.96
7508	3.96
7601	32.8
7602	32.8
7603	32.8
7604	32.8
7605	32.8
7606	32.8
7607	32.8
7608	32.8
7609	32.8
7610	32.8
7611	32.8
7612	32.8
7613	32.8
7614	32.8
7615	32.8
7616	32.8
7801	1.12
7802	1.12
7804	1.12
7806	1.12
7901	5.18
7902	5.18
7903	5.18
7904	5.18
7905	5.18
7907	5.18
8001	4.59
8002	4.59
8003	4.59
8007	4.59
8101	4.5
8102	7.61
8103	2.2
8104	26.08
8105	4.5
8106	1.31
8107	2.61
8108	18.94
8109	8.61
8110	3.58
8111	8.78
8112	5.49
8113	7.85083
8201	6.75
8202	6.75
8203	6.75
8204	6.75
8205	6.75
8206	6.75
8207	6.75
8208	6.75
8209	6.75
8210	6.75
8211	6.75
8212	6.75
8213	6.75
8214	6.75
8215	6.75
8301	6.75
8302	6.75
8303	6.75
8304	6.75
8305	6.75
8306	6.75
8307	6.75
8308	6.75
8309	6.75
8310	6.75
8311	6.75
8401	6.75
8402	6.75
8403	6.75
8404	6.75
8405	6.75
8406	6.75
8407	6.75
8408	6.75
8409	6.75
8410	7.05647
8411	32.8
8412	6.75
8413	6.75
8414	6.75
8415	6.75
8416	6.75
8417	6.75
8418	6.75
8419	6.75
8420	6.75
8421	6.75
8422	6.75
8423	6.75
8424	6.75
8425	6.75
8426	6.75
8427	6.75
8428	6.75
8429	6.75
8430	6.75
8431	6.75
8432	6.75
8433	6.75
8434	6.75
8435	6.75
8436	6.75
8437	6.75
8438	6.75
8439	6.75
8440	6.75
8441	6.75
8442	6.75
8443	6.75
8444	6.75
8445	6.75
8446	6.75
8447	6.75
8448	6.75
8449	6.75
8450	6.75
8451	6.75
8452	6.75
8453	6.75
8454	6.75
8455	6.75
8456	6.75
8457	6.75
8458	6.75
8459	6.75
8460	6.75
8461	6.75
8462	6.75
8463	6.75
8464	6.75
8465	6.75
8466	6.75
8467	6.75
8468	6.75
8469	6.75
8470	6.75
8471	6.75
8472	6.75
8473	6.75
8474	6.75
8475	6.75
8476	6.75
8477	6.75
8478	6.75
8479	6.75
8480	6.75
8481	6.75
8482	6.75
8483	6.75
8484	6.75
8486	6.75
8487	6.75
8501	6.75
8502	6.75
8503	6.75
8504	6.75
8505	8
8506	1.08
8507	0.65
8508	6.75
8509	6.75
8510	6.75
8511	6.75
8512	6.75
8513	6.75
8514	0.14
8515	8
8516	6.75
8517	6.75
8518	5.62143
8519	6.75
8521	6.75
8522	6.75
8523	0.13
8525	6.75
8526	6.75
8527	6.75
8528	0.14
8529	6.75
8530	6.75
8531	6.75
8532	0.14
8533	5.62143
8534	2.11
8535	2.11
8536	2.11
8537	6.75
8538	6.75
8539	0.14
8540	0.14
8541	0.14
8542	2.11
8543	5.62143
8544	2.11
8545	34.16
8546	17.3
8547	0.14
8548	5.62143
8601	6.75
8603	6.75
8604	6.75
8605	6.75
8606	6.75
8607	6.75
8608	6.75
8609	6.75
8701	6.75
8702	6.75
8703	6.75
8704	6.75
8705	6.75
8706	6.75
8707	6.75
8708	6.75
8709	6.75
8711	6.75
8712	6.75
8713	6.75
8714	6.75
8715	6.75
8716	6.75
8801	26.08
8802	32.8
8803	32.8
8804	26.08
8805	32.8
8901	32.8
8903	32.8
8904	32.8
8905	32.8
8906	32.8
8907	26.08
8908	32.8
9001	0.14
9002	0.14
9003	34.46
9004	34.46
9005	6.75
9006	6.75
9007	6.75
9008	6.75
9010	6.75
9011	6.75
9012	6.75
9013	6.75
9014	34.46
9015	6.75
9016	6.75
9017	6.75
9018	6.75
9019	6.75
9020	17.08
9021	9.42467
9022	6.75
9023	6.75
9024	6.75
9025	6.75
9026	6.75
9027	6.75
9028	6.75
9029	6.75
9030	6.75
9031	6.75
9032	6.75
9033	9.42467
9101	0
9102	0
9103	0
9104	0
9105	0
9106	0
9107	0
9108	0
9109	0
9110	0
9111	0
9112	0
9113	0
9114	0
9201	0
9202	0
9205	0
9206	0
9207	0
9208	0
9209	0
9303	0
9304	0
9306	0
9401	13.18
9402	6.75
9403	13.18
9404	33.23
9405	13.18
9406	6.75
9503	6.75
9504	20.56
9505	0
9506	0
9507	33.23
9508	0
9601	0
9602	39.31
9603	23.67
9604	6.75
9605	0
9606	34.46
9607	6.75
9608	34.46
9609	34.16
9610	6.75
9611	31.99
9612	25.9307
9613	51.49
9614	34.36
9615	34.36
9616	25.9307
9617	0.14
9618	33.23
9619	17.08
9701	0
9702	0
9703	0
9704	0
9705	0
9706	0
9999	0

## Sheet: Comtrade2000
Commodity Code	Import(Weight)	Import(Area)	Import(Quantity Number)	Import(Volume)	Import(Trade Value)	Export(Weight)	Export(Area)	Export(Quantity Number)	Export(Volume)	Export(Trade Value)
101	1584960	0	3925	0	467318980	2831832	0	6455	0	362856088
102	2123958	0	6245	0	5721420	11819	0	14	0	14494
103	31200934	0	267546	0	20360211	15035644	0	200273	0	24652359
104	3602268	0	169324	0	10321795	8607096	0	269592	0	15755820
105	391299	0	7663502	0	7991295	17432650	0	34968577	0	91279819
106	505583	0	557061920	0	14066645	474750	0	782794	0	12898299
201	107289616	0	0	0	400317218	4089362	0	0	0	26815026
202	59890655	0	0	0	135324384	1379134	0	0	0	4851792
203	267163424	0	0	0	443636122	208739114	0	0	0	219380460
204	110327167	0	0	0	305322262	110675211	0	0	0	329635503
205	492	0	0	0	5211	2857078	0	0	0	6256821
206	56042466	0	0	0	38939911	55644568	0	0	0	17983313
207	314751462	0	0	0	864567721	206554624	0	0	0	216085333
208	1797930	0	0	0	6322479	3986409	0	0	0	17772259
209	25594457	0	0	0	11479404	10568597	0	0	0	1871381
210	280273837	0	0	0	719603173	9721385	0	0	0	34281108
301	1642433	0	0	0	24337653	835037	0	0	0	7360629
302	64815585	0	0	0	182627518	78707428	0	0	0	265767744
303	70488057	0	0	0	145441210	138566173	0	0	0	96780534
304	174866620	0	0	0	669591704	35199626	0	0	0	115390727
305	2878175	0	0	0	12538115	8538647	0	0	0	75478453
306	38824802	0	0	0	316356643	55967909	0	0	0	318302070
307	9749037	0	0	0	27771607	29346888	0	0	0	100598815
401	136778224	0	0	0	64017053	247800797	0	0	0	179167205
402	41576988	0	0	0	87040328	186129809	0	0	0	317114184
403	1167152057	0	0	0	155711055	18749726	0	0	0	28784394
404	22716483	0	0	0	21853907	38479703	0	0	0	26854419
405	123951781	0	0	0	369782690	46002197	0	0	0	127394279
406	288557255	0	0	0	1021564591	59684182	0	0	0	199844494
407	37444916	0	0	0	38086699	11491005	0	0	0	26478440
408	6034117	0	0	0	15738234	3677420	0	0	0	4228853
409	32922549	0	0	0	32622186	1402810	0	0	0	2190012
410	458701	0	0	0	496919	44033	0	0	0	266489
501	6476	0	0	0	390656	25718	0	0	0	35915
502	2180936	0	0	0	18655424	1479444	0	0	0	13298723
503	122644	0	0	0	715222	147391	0	0	0	761109
504	3923032	0	0	0	4832294	6835832	0	0	0	24071509
505	2964741	0	0	0	8244201	1603741	0	0	0	2892571
506	53816237	0	0	0	23302324	25968172	0	0	0	5314934
507	2390380	0	0	0	1123743	30833	0	0	0	147726
508	2420938	0	0	0	1082242	5369884	0	0	0	6230039
509	23190	0	0	0	213635	30667	0	0	0	523514
510	8705	0	0	0	299978	440346	0	0	0	835795
511	77436345	0	0	0	52974743	29721221	0	0	0	14398859
601	14524207	0	0	0	49302020	11579893	0	0	0	10910442
602	188786954	0	0	0	253669932	29104493	0	0	0	17443470
603	110563316	0	0	0	542444357	4967131	0	0	0	28907255
604	22555276	0	0	0	28706539	1188769	0	0	0	3003214
701	410268508	0	0	0	122410447	198907049	0	0	0	61043469
702	288623726	0	0	0	376020935	5835969	0	0	0	7306351
703	189722801	0	0	0	76969227	11673171	0	0	0	7808730
704	125307559	0	0	0	101073622	5660241	0	0	0	4579526
705	171697844	0	0	0	163068724	4312063	0	0	0	6820299
706	56163044	0	0	0	34913838	17188235	0	0	0	5429736
707	70725090	0	0	0	82384381	171311	0	0	0	158754
708	37980443	0	0	0	92854937	49732689	0	0	0	9957567
709	315850761	0	0	0	517133796	4448868	0	0	0	4021500
710	321669755	0	0	0	228916302	78512902	0	0	0	60706202
711	19655236	0	0	0	13513234	1187559	0	0	0	1106647
712	50678315	0	0	0	71441361	2204725	0	0	0	8516970
713	161394853	0	0	0	93331801	252466491	0	0	0	59895215
714	20449642	0	0	0	16661133	741192	0	0	0	1207563
801	37611000	0	0	0	81051299	1680895	0	0	0	4843008
802	32861561	0	0	0	103686078	4491968	0	0	0	17932016
803	787370723	0	0	0	510481972	6814332	0	0	0	4415101
804	90784553	0	0	0	100671055	1265894	0	0	0	2249545
805	688706984	0	0	0	381760844	21515558	0	0	0	11382185
806	263394427	0	0	0	390546672	7453894	0	0	0	13068742
807	163255568	0	0	0	101203322	3507420	0	0	0	3728743
808	623926720	0	0	0	475868195	20154245	0	0	0	15382211
809	224696730	0	0	0	209933673	1603764	0	0	0	2573166
810	79221504	0	0	0	125949643	1525338	0	0	0	3204360
811	53156784	0	0	0	73351546	3683355	0	0	0	5900233
812	36886686	0	0	0	41087212	418763	0	0	0	410792
813	23851142	0	0	0	57438514	3358411	0	0	0	5430284
814	2140768	0	0	0	2177936	97152	0	0	0	341776
901	135059537	0	0	0	291146207	7578781	0	0	0	34835241
902	198246045	0	0	0	394344667	22560328	0	0	0	159953607
903	43000	0	0	0	63463	324459	0	0	0	1055757
904	10654075	0	0	0	37747960	1136853	0	0	0	6917348
905	394397	0	0	0	6490736	192415	0	0	0	5847689
906	1169780	0	0	0	1965256	37399	0	0	0	194284
907	430608	0	0	0	1444845	75176	0	0	0	453874
908	815223	0	0	0	7342238	221338	0	0	0	2939057
909	9434599	0	0	0	12847698	601440	0	0	0	1568364
910	18807603	0	0	0	30121940	10671552	0	0	0	12036191
1001	1205373521	0	0	0	201800041	3614316253	0	0	0	436258400
1002	1005539	0	0	0	272114	226756	0	0	0	63309
1003	94843609	0	0	0	14648357	1835249801	0	0	0	205488509
1004	6727157	0	0	0	1479989	97250666	0	0	0	12546708
1005	1318303702	0	0	0	215572216	19882583	0	0	0	4968741
1006	593939280	0	0	0	296546117	63902596	0	0	0	39235453
1007	3172095	0	0	0	937583	37498	0	0	0	275282
1008	37582651	0	0	0	9327526	224938	0	0	0	388504
1101	57537572	0	0	0	23558793	93675665	0	0	0	24096152
1102	23476483	0	0	0	9448583	5902312	0	0	0	2484753
1103	36852014	0	0	0	12649287	20338854	0	0	0	6609444
1104	31912221	0	0	0	14633982	141165469	0	0	0	58962918
1105	22069651	0	0	0	19034874	1854173	0	0	0	1741049
1106	1280790	0	0	0	2378890	1048977	0	0	0	1740071
1107	42146794	0	0	0	18661454	418186178	0	0	0	116611740
1108	153838294	0	0	0	61874485	17619863	0	0	0	6671245
1109	26157680	0	0	0	23386595	4465348	0	0	0	3666555
1201	776414678	0	0	0	167007285	10828678	0	0	0	1676296
1202	105308863	0	0	0	75239888	1185009	0	0	0	1703872
1203	7597832	0	0	0	1678234	2366	0	0	0	11724
1204	6650687	0	0	0	3059220	74639227	0	0	0	12439349
1205	290315314	0	0	0	68106046	50027992	0	0	0	8806027
1206	21634090	0	0	0	9253316	224837	0	0	0	367831
1207	27309165	0	0	0	13986653	1380092	0	0	0	2461227
1208	6607864	0	0	0	4298199	11540211	0	0	0	4222616
1209	25894318	0	0	0	87343274	3947002	0	0	0	32371191
1210	1570846	0	0	0	7603010	763030	0	0	0	4015813
1211	8576088	0	0	0	36305713	601382	0	0	0	6089464
1212	27721451	0	0	0	14478435	2036340	0	0	0	3080403
1213	20431996	0	0	0	1163215	20379394	0	0	0	1741837
1214	25992907	0	0	0	7142082	857878	0	0	0	375455
1301	8730749	0	0	0	18263548	4299622	0	0	0	13093799
1302	27120738	0	0	0	106355039	6846812	0	0	0	29523654
1401	10542384	0	0	0	6962938	82085	0	0	0	609600
1402	7952	0	0	0	18997	2568	0	0	0	22734
1403	279778	0	0	0	562873	3382	0	0	0	12705
1404	6487400	0	0	0	6876304	469277	0	0	0	1151110
1501	37219984	0	0	0	13791630	10633167	0	0	0	2735235
1502	39914398	0	0	0	17493815	28264461	0	0	0	9004278
1503	5388614	0	0	0	1560324	10582643	0	0	0	2222477
1504	44932777	0	0	0	25978896	1706589	0	0	0	5412718
1505	9286233	0	0	0	19920844	7402159	0	0	0	28390056
1506	228239	0	0	0	247301	1828121	0	0	0	1110447
1507	17973138	0	0	0	8848355	30595238	0	0	0	14653261
1508	7879469	0	0	0	7022645	1271660	0	0	0	1518424
1509	45346591	0	0	0	87452195	1975043	0	0	0	9001743
1510	1700307	0	0	0	2083550	1044444	0	0	0	1860389
1511	746545096	0	0	0	237268551	26808470	0	0	0	13941244
1512	167954977	0	0	0	80517370	3760651	0	0	0	4440179
1513	120114465	0	0	0	60506032	4645689	0	0	0	3472906
1514	190986558	0	0	0	82046794	62599941	0	0	0	31678272
1515	16614691	0	0	0	31290851	23016688	0	0	0	30719662
1516	37906425	0	0	0	42450588	20812782	0	0	0	13080696
1517	76212147	0	0	0	87901216	58356701	0	0	0	37994270
1518	16519644	0	0	0	7315258	12917370	0	0	0	11079398
1520	25977631	0	0	0	21023420	1142101	0	0	0	614948
1521	1057944	0	0	0	4302100	273143	0	0	0	1487205
1522	677259	0	0	0	1299969	975365	0	0	0	1528007
1601	70042149	0	0	0	126976404	3265678	0	0	0	10461636
1602	259508614	0	0	0	805015373	29115551	0	0	0	102124773
1603	1079339	0	0	0	5105554	835844	0	0	0	1444289
1604	185718707	0	0	0	515435828	23078921	0	0	0	77500144
1605	47655793	0	0	0	285074292	6811600	0	0	0	40752939
1701	1349239991	0	0	0	690675551	699298878	0	0	0	183997723
1702	216180369	0	0	0	82004224	108687519	0	0	0	38053944
1703	572206288	0	0	0	50989284	43361265	0	0	0	6864273
1704	79187391	0	0	0	217728625	85924769	0	0	0	344533607
1801	150426976	0	0	0	138803120	5215760	0	0	0	3655516
1802	18082688	0	0	0	842918	8029	0	0	0	33732
1803	9447553	0	0	0	14449690	19781234	0	0	0	26320503
1804	36624138	0	0	0	86121217	3569176	0	0	0	11079943
1805	6408421	0	0	0	8568873	9581423	0	0	0	11772676
1806	284948818	0	0	0	609204127	131202711	0	0	0	492323443
1901	101719876	0	0	0	259918928	147727012	0	0	0	189283349
1902	206038148	0	0	0	201421880	12398402	0	0	0	25560566
1903	668976	0	0	0	477023	218996	0	0	0	327035
1904	50088627	0	0	0	94236543	187340679	0	0	0	396190423
1905	420102542	0	0	0	738092458	276951379	0	0	0	588675836
2001	31916457	0	0	0	37962634	4179456	0	0	0	11390017
2002	399027939	0	0	0	262245708	7040652	0	0	0	5763589
2003	8838951	0	0	0	14447687	206202	0	0	0	527172
2004	355019654	0	0	0	215947945	41910292	0	0	0	47514681
2005	260554168	0	0	0	272275677	62786991	0	0	0	91134853
2006	11862891	0	0	0	29143376	1007046	0	0	0	2104365
2007	33870919	0	0	0	55912336	14939323	0	0	0	34103059
2008	282995245	0	0	0	292803315	19043678	0	0	0	39727078
2009	421183596	0	0	0	435097612	47163724	0	0	0	50440640
2101	21506979	0	0	0	147756931	26503022	0	0	0	122160135
2102	29797698	0	0	0	20660982	19450011	0	0	0	55081140
2103	289518604	0	0	0	329104259	74023667	0	0	0	134237338
2104	25165872	0	0	0	60817404	31254590	0	0	0	68114842
2105	63780613	0	0	0	160956915	42156084	0	0	0	88552262
2106	147011762	0	0	0	474569916	165504496	0	0	0	402108968
2201	424281719	0	0	396194829	132880760	18078161	0	0	16345884	8692017
2202	299384988	0	0	286330073	315501537	316345094	0	0	295241021	199272057
2203	628088526	0	0	612260395	483466130	389798251	0	0	368866337	371316322
2204	1335083208	0	0	1239848446	3422447750	26869010	0	0	21987357	172621026
2205	22078842	0	0	17056905	24060907	2059735	0	0	1987459	6613585
2206	25894072	0	0	23811732	39282190	29625592	0	0	27793267	33797970
2207	67834021	0	0	88194996	34207034	146064951	0	0	179489863	69201053
2208	182712165	0	0	83144412	679698988	800704457	0	0	359998895	4029588456
2209	15069449	0	0	14421439	13693711	3017253	0	0	2222476	3057455
2301	258426346	0	0	0	124265827	54430650	0	0	0	25494263
2302	80807392	0	0	0	10416541	52867365	0	0	0	7596577
2303	277266368	0	0	0	35042460	118436783	0	0	0	19270963
2304	1456794895	0	0	0	302449206	11086551	0	0	0	2960504
2305	33384717	0	0	0	2660461	1071	0	0	0	10568
2306	1178773845	0	0	0	119797851	211935714	0	0	0	24114643
2307	23923146	0	0	0	5555551	26447	0	0	0	126821
2308	206044232	0	0	0	19663768	24245727	0	0	0	4354734
2309	1308067193	0	0	0	475128622	390140735	0	0	0	408918401
2401	170984614	0	0	0	564917272	11068550	0	0	0	24921020
2402	10184188	0	0	0	138585638	81018216	0	0	0	1355361050
2403	12124526	0	0	0	40927256	15920775	0	0	0	161505523
2501	229624653	0	0	0	13232483	290430047	0	0	0	25942419
2502	5018	0	0	0	9375	245721	0	0	0	224109
2503	0	0	0	0	0	10334360	0	0	0	1905661
2504	25998083	0	0	0	17079240	2172682	0	0	0	3594167
2505	144856772	0	0	0	12672741	187213870	0	0	0	9978048
2506	8523576	0	0	0	4605155	261985	0	0	0	640581
2507	47236501	0	0	0	11174099	3461074609	0	0	0	344019043
2508	148393836	0	0	0	37613870	101557078	0	0	0	39626466
2509	6551434	0	0	0	649268	25134361	0	0	0	4067452
2510	13889825	0	0	0	2161008	1295802	0	0	0	401325
2511	1782871	0	0	0	1194536	1337471	0	0	0	440527
2512	35553766	0	0	0	10086447	515093	0	0	0	1016428
2513	41035298	0	0	0	3737545	2664275	0	0	0	2539975
2514	27715913	0	0	0	10352821	1251375	0	0	0	498553
2515	28630319	0	0	0	10788875	8941849	0	0	0	776478
2516	1002859631	0	0	0	63643583	6960622	0	0	0	1938127
2517	426150834	0	0	0	20159511	12096235655	0	0	0	65494197
2518	166400532	0	0	0	5469777	113971280	0	0	0	7619135
2519	133157646	0	0	0	33511165	44655270	0	0	0	32282470
2520	560941636	0	0	0	37195390	43475939	0	0	0	13446954
2521	3671332	0	0	0	981448	228990445	0	0	0	6288908
2522	2539454	0	0	0	603081	121602282	0	0	0	13441271
2523	583418877	0	0	0	46924515	872520902	0	0	0	69781759
2524	245585	0	0	0	370328	1606	0	0	0	18066
2525	13717478	0	0	0	3978221	3793641	0	0	0	3757734
2526	44444332	0	0	0	10067978	3761376	0	0	0	1991637
2527	615730	0	0	0	530381	300511	0	0	0	285922
2528	16398457	0	0	0	2937303	225991	0	0	0	62569
2529	27422761	0	0	0	2414230	5156258	0	0	0	1321612
2530	710711476	0	0	0	40914266	42217960	0	0	0	22326517
2601	16749201594	0	0	0	393639856	993769	0	0	0	242658
2602	2956490	0	0	0	1426032	308301	0	0	0	851233
2603	525322	0	0	0	3488307	36742	0	0	0	39269
2604	116	0	0	0	23793	1642	0	0	0	16119
2605	233383	0	0	0	80502	25	0	0	0	166
2607	14392379	0	0	0	2039150	4567	0	0	0	9067
2608	177203995	0	0	0	47374170	1666035	0	0	0	797045
2609	20	0	0	0	412	121157	0	0	0	1772584
2610	163666168	0	0	0	11836446	523987	0	0	0	184340
2611	775050	0	0	0	20526	1551	0	0	0	6114
2613	13295921	0	0	0	40448119	318606	0	0	0	1246509
2614	205209180	0	0	0	47350432	2819	0	0	0	870
2615	34059729	0	0	0	21423297	445839	0	0	0	4611857
2616	489544	0	0	0	222210732	67534	0	0	0	185888
2617	4336686	0	0	0	1333185	121022	0	0	0	409655
2618	337062178	0	0	0	5111847	17178789	0	0	0	1857777
2619	249847944	0	0	0	68450583	880305	0	0	0	557650
2620	19622244	0	0	0	553514424	32015900	0	0	0	96231663
2621	155058187	0	0	0	13146729	26323387	0	0	0	13268890
2701	23792330756	0	0	0	1031906821	1027238309	0	0	0	71192376
2702	1439929	0	0	0	122455	2761527	0	0	0	387378
2703	423637199	0	0	0	40303263	30941469	0	0	0	4062187
2704	524092523	0	0	0	41189056	403752321	0	0	0	38535863
2706	4272642	0	0	0	698083	12703495	0	0	0	3557467
2707	406925422	0	0	0	116309484	819319180	0	0	0	221690817
2708	4161025	0	0	0	878970	49876481	0	0	0	10519601
2709	37462405899	0	0	0	7802319345	77779900407	0	0	0	15896845035
2710	18343394985	0	0	0	4862621655	24248895934	0	0	0	5932471315
2711	2714340161	0	0	0	456182451	11730432526	0	0	0	2236899733
2712	30311414	0	0	0	31320100	149746736	0	0	0	50296345
2713	676479088	0	0	0	52693971	89480091	0	0	0	15054922
2714	295303257	0	0	0	35154781	148097826	0	0	0	22146387
2715	4049055	0	0	0	2566654	303605453	0	0	0	27720874
2716	14748141244	14748141244	0	0	563912221	132258000	132258000	0	0	7593481
2801	7347139	0	0	0	25544121	16857172	0	0	0	19697583
2802	118443	0	0	0	65331	379474	0	0	0	354072
2803	64593928	0	0	0	51860587	70325436	0	0	0	51769745
2804	130759007	0	0	0	161741413	17028965	0	0	0	25314875
2805	4524348	0	0	0	17076471	378181	0	0	0	4644291
2806	1926028	0	0	0	3501407	9604426	0	0	0	4568402
2807	3305	0	0	0	10604	73609401	0	0	0	3250206
2808	5535050	0	0	0	3538421	2900718	0	0	0	904755
2809	314789693	0	0	0	76276965	28852589	0	0	0	14251055
2810	13850677	0	0	0	6976465	559690	0	0	0	10306734
2811	115928178	0	0	0	73381382	60287248	0	0	0	101745716
2812	18315385	0	0	0	22797758	1887588	0	0	0	6536988
2813	21747540	0	0	0	4035747	68850	0	0	0	2112704
2814	1028326	0	0	0	1338284	268073147	0	0	0	42946407
2815	591781144	0	0	0	42125207	124277317	0	0	0	25121173
2816	10212559	0	0	0	3875817	794586	0	0	0	518215
2817	6291603	0	0	0	6830437	10799421	0	0	0	13664656
2818	375049125	0	0	0	110169390	12361374	0	0	0	18500847
2819	5306330	0	0	0	8786989	54583	0	0	0	300257
2820	5559339	0	0	0	5879751	402748	0	0	0	1161440
2821	71199638	0	0	0	55171897	21436075	0	0	0	26131051
2822	533247	0	0	0	9297897	1146270	0	0	0	22072760
2823	6700504	0	0	0	14963293	2085296	0	0	0	5179623
2824	4230920	0	0	0	3604430	4244802	0	0	0	4818847
2825	17196921	0	0	0	53768166	4057477	0	0	0	7864907
2826	19491905	0	0	0	21430853	4854687	0	0	0	11946962
2827	96152002	0	0	0	58032560	53064455	0	0	0	30275660
2828	12742544	0	0	0	12692162	39007053	0	0	0	19972922
2829	4350135	0	0	0	4653893	1420229	0	0	0	8456432
2830	8847844	0	0	0	6983335	3314644	0	0	0	2028087
2831	2576517	0	0	0	2610522	56100	0	0	0	96693
2832	4369695	0	0	0	2571996	1836818	0	0	0	704380
2833	116530688	0	0	0	35599157	27177626	0	0	0	16129031
2834	29963154	0	0	0	11076700	8104221	0	0	0	9720810
2835	197822637	0	0	0	89686232	86603021	0	0	0	67594866
2836	153645479	0	0	0	51700000	53440011	0	0	0	35859959
2837	11387021	0	0	0	5445992	0	0	0	0	0
2838	9030527	0	0	0	8864448	1482263	0	0	0	3966489
2839	41511779	0	0	0	24531083	3208034	0	0	0	1968692
2840	53330225	0	0	0	19107903	10712307	0	0	0	5862837
2841	5679217	0	0	0	12197789	981410	0	0	0	3361375
2842	3156095	0	0	0	5536341	39524528	0	0	0	23145331
2843	176931	0	0	0	34265349	630226	0	0	0	676382776
2844	888959	0	0	0	309970626	6775461	0	0	0	138644712
2845	31874	0	0	0	4007626	20575	0	0	0	14690393
2846	3101740	0	0	0	16937161	659979	0	0	0	12685880
2847	17595460	0	0	0	7810866	0	0	0	0	0
2848	12409	0	0	0	1285399	19505	0	0	0	82066
2849	40254770	0	0	0	39595766	387444	0	0	0	1347846
2850	1246491	0	0	0	16042723	350492	0	0	0	5966578
2851	3169106	0	0	0	10047048	1832020	0	0	0	11390161
2901	202165959	0	0	0	101003042	1419193371	0	0	0	710951926
2902	665517032	0	0	0	382346335	994220128	0	0	0	387670403
2903	273564382	0	0	0	236555036	136133159	0	0	0	167449825
2904	45889784	0	0	0	71214816	18247204	0	0	0	59502287
2905	295840068	0	0	0	228373481	124719082	0	0	0	84644807
2906	17665178	0	0	0	61753664	3453429	0	0	0	25415640
2907	131906409	0	0	0	116446948	20893041	0	0	0	159098002
2908	2293926	0	0	0	7070459	5617388	0	0	0	18924456
2909	146454256	0	0	0	236272685	40684405	0	0	0	88250705
2910	110160721	0	0	0	65466310	2765936	0	0	0	4755799
2911	570661	0	0	0	1057834	215506	0	0	0	629593
2912	40329338	0	0	0	43726879	23749110	0	0	0	48571101
2913	325131	0	0	0	5926189	284402	0	0	0	1128888
2914	90438012	0	0	0	121240099	166041202	0	0	0	172892847
2915	821007399	0	0	0	230759116	212976818	0	0	0	203422637
2916	410846662	0	0	0	423149349	97153870	0	0	0	234299997
2917	210840240	0	0	0	132746190	57245772	0	0	0	79151464
2918	57688173	0	0	0	168169552	59598364	0	0	0	133829513
2919	7311591	0	0	0	15860361	26713491	0	0	0	53377271
2920	31261141	0	0	0	44068608	24328879	0	0	0	39608134
2921	82502030	0	0	0	245385961	347553444	0	0	0	363259358
2922	92459221	0	0	0	475532894	504183057	0	0	0	612865342
2923	16654340	0	0	0	32362091	10087665	0	0	0	19856563
2924	57091989	0	0	0	331203227	65050233	0	0	0	333650715
2925	2791281	0	0	0	21410747	11970921	0	0	0	67765662
2926	217218	0	0	0	777406	75085094	0	0	0	167102707
2927	1877490	0	0	0	9249267	455754	0	0	0	7685086
2928	1856106	0	0	0	15704863	873115	0	0	0	8303309
2929	44701706	0	0	0	75114861	3647377	0	0	0	16605049
2930	19294666	0	0	0	271476552	9256612	0	0	0	862109916
2931	9609701	0	0	0	52751411	86209468	0	0	0	199556042
2932	26703135	0	0	0	927382349	57493996	0	0	0	170446185
2933	59094632	0	0	0	1478858092	45635966	0	0	0	1006044880
2934	2680389	0	0	0	22220754	18227424	0	0	0	1320242534
2935	4346907	0	0	0	132204604	571544	0	0	0	52344735
2936	9285307	0	0	0	96102438	2354904	0	0	0	22367016
2937	675217	0	0	0	137765731	253477	0	0	0	224515834
2938	1248210	0	0	0	5927572	20471	0	0	0	3812954
2939	538870	0	0	0	148753369	198268	0	0	0	51720963
2940	8216870	0	0	0	17437059	375845	0	0	0	5281877
2941	7670105	0	0	0	298155620	6476690	0	0	0	315340547
2942	841814	0	0	0	16228102	1456910	0	0	0	25941953
3001	10455744	0	0	0	30623894	330258	0	0	0	20505354
3002	49771700	0	0	0	702618129	3458195	0	0	0	380800847
3003	18801166	0	0	0	343638179	4390468	0	0	0	190660119
3004	104957858	0	0	0	5430758450	129923612	0	0	0	8996214080
3005	11385885	0	0	0	150841394	10845903	0	0	0	243064659
3006	3665884	0	0	0	232413757	2436628	0	0	0	420930263
3101	5647447	0	0	0	3654419	5157186	0	0	0	5451187
3102	2270405858	0	0	0	273106942	190587515	0	0	0	27740104
3103	287171151	0	0	0	43586342	271694	0	0	0	654889
3104	295146274	0	0	0	43429329	2119738	0	0	0	1824441
3105	821834814	0	0	0	126265452	405865669	0	0	0	80311732
3201	1966697	0	0	0	2882224	238756	0	0	0	797737
3202	2529023	0	0	0	3613384	36214436	0	0	0	36457264
3203	3306558	0	0	0	19808126	1035024	0	0	0	13032725
3204	74748619	0	0	0	473508490	48108499	0	0	0	256615718
3205	497936	0	0	0	3637451	251015	0	0	0	6361635
3206	198511331	0	0	0	226003963	224318630	0	0	0	392795425
3207	26726718	0	0	0	81123307	15846688	0	0	0	159652985
3208	66640437	0	0	0	232952340	121102654	0	0	0	343270210
3209	51826595	0	0	0	114487707	79035101	0	0	0	117823985
3210	7157691	0	0	0	21511128	11926748	0	0	0	30648022
3211	920991	0	0	0	3568925	5179573	0	0	0	11069238
3212	11553754	0	0	0	81425790	10469245	0	0	0	113607585
3213	5995074	0	0	0	21303444	6222983	0	0	0	39018904
3214	88955286	0	0	0	130449950	42331635	0	0	0	109832220
3215	74368306	0	0	0	365180699	63042350	0	0	0	433422129
3301	16062354	0	0	0	138456617	8386252	0	0	0	93553023
3302	49455667	0	0	0	589392574	77509946	0	0	0	484464641
3303	22996521	0	0	0	429290729	24713643	0	0	0	289793007
3304	74557642	0	0	0	675546667	55019845	0	0	0	730907663
3305	110487843	0	0	0	291728493	134087446	0	0	0	456668147
3306	35814793	0	0	0	76823004	79141156	0	0	0	273845041
3307	188457972	0	0	0	264542463	193416811	0	0	0	719202273
3401	120603560	0	0	0	184340573	132574378	0	0	0	193158708
3402	472017244	0	0	0	525973333	569446387	0	0	0	633731745
3403	34970976	0	0	0	77458375	61740827	0	0	0	138382796
3404	30013767	0	0	0	57416666	15804022	0	0	0	36355428
3405	31868377	0	0	0	50636405	24885789	0	0	0	76003287
3406	39426862	0	0	0	83194510	62048809	0	0	0	46836365
3407	1977672	0	0	0	13340830	827793	0	0	0	7454539
3501	7912038	0	0	0	31169463	6488918	0	0	0	27214793
3502	5209737	0	0	0	25683223	1863958	0	0	0	8657153
3503	15293148	0	0	0	53196910	11438657	0	0	0	42316732
3504	7290572	0	0	0	26539929	8811474	0	0	0	28935549
3505	152777679	0	0	0	94623640	29789591	0	0	0	43189126
3506	73085330	0	0	0	166198004	61593531	0	0	0	180660923
3507	8790449	0	0	0	84363080	5656032	0	0	0	195923467
3604	12389458	0	0	0	34000376	247541	0	0	0	1583620
3605	2226173	0	0	0	10076193	86316	0	0	0	508941
3606	8129741	0	0	0	19974682	13818355	0	0	0	13776836
3701	18960732	0	0	0	314452093	34251620	0	0	0	340692304
3702	21484360	0	0	0	900240512	270944111	0	0	0	704885067
3703	24935567	0	0	0	159839971	84272151	0	0	0	454307430
3704	148325	0	0	0	2747656	517911	0	0	0	1999865
3705	594974	0	0	0	15157378	639224	0	0	0	52309764
3706	384541	0	0	0	8114319	900825	0	0	0	37447938
3707	30826715	0	0	0	271740297	30237579	0	0	0	181929151
3801	12108025	0	0	0	32512965	8029988	0	0	0	24254473
3802	73559364	0	0	0	34259973	37227379	0	0	0	49077535
3803	2668438	0	0	0	1244657	1386099	0	0	0	718608
3804	48689424	0	0	0	9562309	2954779	0	0	0	1418195
3805	2254212	0	0	0	2366295	398054	0	0	0	1130887
3806	13613698	0	0	0	14288617	24110626	0	0	0	20651529
3807	388477	0	0	0	634187	10174352	0	0	0	3330197
3808	79680002	0	0	0	438284856	152483913	0	0	0	1072381177
3809	65606764	0	0	0	74311783	37460517	0	0	0	77913311
3810	6656082	0	0	0	20559818	9900355	0	0	0	44207964
3811	126095715	0	0	0	63964535	171310261	0	0	0	308197429
3812	37558563	0	0	0	84420841	41824524	0	0	0	76101434
3813	2213745	0	0	0	3671816	26482441	0	0	0	19640653
3814	16529108	0	0	0	18046827	77240597	0	0	0	71198890
3815	32080174	0	0	0	162327825	15257061	0	0	0	244812459
3816	79575413	0	0	0	24463424	101640645	0	0	0	76740052
3817	40346318	0	0	0	35280937	3288773	0	0	0	3652296
3818	542728	0	0	0	127698588	503471	0	0	0	147128756
3819	6374783	0	0	0	10755129	27162212	0	0	0	41260774
3820	74180795	0	0	0	17222219	24813755	0	0	0	21297992
3821	1375841	0	0	0	21538868	3168938	0	0	0	49193887
3822	7260819	0	0	0	541540853	7606485	0	0	0	689315238
3823	220907242	0	0	0	129536105	109436918	0	0	0	67187348
3824	842563113	0	0	0	784781095	691654145	0	0	0	824463124
3901	1311740382	0	0	0	1049525848	35969204	0	0	0	58577775
3902	629796648	0	0	0	445943052	184465730	0	0	0	148491975
3903	287483641	0	0	0	344286120	301595673	0	0	0	293917529
3904	472805993	0	0	0	434298895	112437264	0	0	0	111017744
3905	53289476	0	0	0	74957171	55408045	0	0	0	68809436
3906	178111121	0	0	0	274743580	0	0	0	0	0
3907	491649963	0	0	0	853281058	350961389	0	0	0	547524005
3908	81964785	0	0	0	192520248	15365745	0	0	0	33129807
3909	85972447	0	0	0	164818387	112118901	0	0	0	187028659
3910	31860570	0	0	0	136080465	100473782	0	0	0	218229809
3911	42824978	0	0	0	92726389	29862450	0	0	0	140923567
3912	38151942	0	0	0	124197673	5061554	0	0	0	28713267
3913	4485810	0	0	0	38754950	3544623	0	0	0	18783978
3914	7089003	0	0	0	22392981	0	0	0	0	0
3915	17676058	0	0	0	12581857	82217677	0	0	0	37836457
3916	48893415	0	0	0	110391457	35024852	0	0	0	90816550
3917	242055608	0	0	0	225591917	129134167	0	0	0	514127988
3918	52605765	0	0	0	103743615	80008334	0	0	0	185896261
3919	142942097	0	0	0	352875877	84002833	0	0	0	279420864
3920	713631140	0	0	0	1211604113	310718692	0	0	0	827454885
3921	167892951	0	0	0	529574275	87953170	0	0	0	405492082
3922	14182181	0	0	0	61942999	14714783	0	0	0	92306858
3923	608870037	0	0	0	1230623464	556967165	0	0	0	738144355
3924	99401121	0	0	0	301598431	27690806	0	0	0	121854344
3925	207218570	0	0	0	132071575	41626643	0	0	0	167378496
3926	401915421	0	0	0	1347870477	126863619	0	0	0	783961145
4001	156898916	0	0	0	118815750	8733937	0	0	0	10779376
4002	214187026	0	0	0	252628907	189148155	0	0	0	254995643
4003	1186301	0	0	0	679870	55567	0	0	0	383897
4004	3807600	0	0	0	1432451	6007850	0	0	0	6774187
4005	37786435	0	0	0	95607783	49285215	0	0	0	87519633
4006	3222547	0	0	0	12514103	4183007	0	0	0	8720954
4007	2163432	0	0	0	6265859	289869	0	0	0	1845566
4008	19944560	0	0	0	93416839	44478809	0	0	0	128429523
4009	29165140	0	0	0	214769955	20749645	0	0	0	156674275
4010	16155997	0	0	0	114881874	9543253	0	0	0	123364317
4011	436996902	0	42753418	0	1383310133	289670239	0	21392008	0	1120915647
4012	44540597	0	0	0	28656415	20882695	0	0	0	34530597
4013	5262896	0	9209662	0	13941462	582782	0	287574	0	2212401
4014	5674876	0	0	0	34923640	2253335	0	0	0	30239676
4015	31513913	0	0	0	136684406	4548783	0	0	0	52088956
4016	258831831	0	0	0	387715210	38222665	0	0	0	370641919
4017	2362415	0	0	0	6153245	941586	0	0	0	3320009
4101	41479960	0	0	0	71695073	65380476	0	0	0	108835410
4102	10741306	0	0	0	25576463	51074779	0	0	0	105867427
4103	223450	0	0	0	1942558	1059407	0	0	0	2811067
4104	16274501	0	0	0	202228780	41605023	0	0	0	287367831
4105	421232	0	0	0	18212548	877586	0	0	0	43818177
4106	391457	0	0	0	4587217	67832	0	0	0	3508090
4107	374568	0	0	0	3196966	41318	0	0	0	2600192
4108	394798	0	0	0	7446720	287480	0	0	0	8213520
4109	432113	0	0	0	18612599	57935	0	0	0	585257
4110	3144750	0	0	0	716580	2027526	0	0	0	3675224
4111	1111380	0	0	0	3477808	303895	0	0	0	1029328
4201	2793673	0	0	0	29143945	1254270	0	0	0	40135908
4202	1217477823	0	0	0	1051217490	20155906	0	0	0	239607895
4203	23613113	0	0	0	363539763	1973312	0	0	0	59746168
4204	205496	0	0	0	1470782	201348	0	0	0	4880085
4205	5674467	0	0	0	39752276	852186	0	0	0	16690135
4206	35802	0	0	0	1656759	7640	0	0	0	776603
4301	132729	0	0	0	10882568	137989	0	0	0	5117339
4302	662061	0	0	0	30456174	1969456	0	0	0	49084900
4303	165318	0	0	0	8428316	73633	0	0	0	4119694
4304	199556	0	0	0	2313049	81047	0	0	0	2305028
4401	133558970	0	0	0	14184787	174324763	0	0	0	7253462
4402	45569671	0	0	0	17330641	763638	0	0	0	960194
4403	193614059	0	0	0	76366575	46536237	0	0	0	21510869
4404	8473553	0	0	0	3511150	6809656	0	0	0	2044709
4405	856581	0	0	0	647423	354636	0	0	0	434030
4406	18344066	0	0	0	5567461	128605	0	0	0	117868
4407	4490872952	0	0	0	1707836648	113346798	0	0	0	48676321
4408	28342232	0	0	0	77524053	12750306	0	0	0	23151035
4409	113138289	0	0	0	160349819	21329099	0	0	0	27916853
4410	478321024	0	0	0	176113564	121875802	0	0	0	43115613
4411	543940999	0	0	0	284388760	69009205	0	0	0	30003341
4412	801396924	0	0	0	502490843	22193257	0	0	0	21405228
4413	22924920	0	0	0	11342350	8974852	0	0	0	3343086
4414	9474305	0	0	0	32662037	1714179	0	0	0	8058341
4415	325463747	0	16263922	0	132339051	230258301	0	9173809	0	102228869
4416	20527800	0	0	0	25832104	304055	0	0	0	668341
4417	5497835	0	0	0	12003074	428299	0	0	0	1837854
4418	226372276	0	0	0	433096881	31159470	0	0	0	94270979
4419	15323432	0	0	0	48153922	3016070	0	0	0	12189774
4420	16487374	0	0	0	59894121	1341159	0	0	0	10634668
4421	92630476	0	0	0	164262839	7915477	0	0	0	32276896
4501	485611	0	0	0	1105950	4926	0	0	0	77019
4502	608394	0	0	0	921319	72803	0	0	0	1096082
4503	754328	0	0	0	11351000	63881	0	0	0	797249
4504	4291301	0	0	0	11971806	500808	0	0	0	3422219
4601	4416433	0	0	0	7235723	336864	0	0	0	923686
4602	15274439	0	0	0	46606172	1004869	0	0	0	3440708
4701	80448265	0	0	0	43202692	3180405	0	0	0	1592793
4702	1650375	0	0	0	2013851	19513	0	0	0	36932
4703	1720190085	0	0	0	1061531929	5126324	0	0	0	3227637
4704	78589158	0	0	0	55709474	75853	0	0	0	180346
4705	21178892	0	0	0	14541374	66047	0	0	0	60455
4706	43239795	0	0	0	41988344	13972757	0	0	0	6432044
4707	136277692	0	0	0	29030422	587625284	0	0	0	104283472
4801	1596462462	0	0	0	804607173	217289763	0	0	0	88862767
4802	1218373298	0	0	0	962224878	204578454	0	0	0	350756890
4803	157371682	0	0	0	189540532	36931799	0	0	0	47538513
4804	844748749	0	0	0	484522771	51806492	0	0	0	43878502
4805	487105636	0	0	0	244114783	440217562	0	0	0	233716400
4806	59217875	0	0	0	81261183	11749690	0	0	0	24395415
4807	79594490	0	0	0	51946626	6477669	0	0	0	10237827
4808	36831956	0	0	0	23735573	55784668	0	0	0	59273246
4809	43325876	0	0	0	54931099	108368348	0	0	0	118351675
4810	2600212880	0	0	0	1971684076	419997919	0	0	0	385502984
4811	275674037	0	0	0	526309188	205341244	0	0	0	462203690
4812	404044	0	0	0	1952050	2035960	0	0	0	7232995
4813	7804167	0	0	0	35284020	12408868	0	0	0	42388583
4814	10016283	0	0	0	41621319	40299354	0	0	0	146181304
4815	181529	0	0	0	197905	432408	0	0	0	1815840
4816	41476368	0	0	0	59037438	31494385	0	0	0	43421297
4817	55363006	0	0	0	128510487	7660318	0	0	0	35958835
4818	539672794	0	0	0	583992906	176835573	0	0	0	458362054
4819	210757898	0	0	0	389666202	114560040	0	0	0	235385380
4820	302481218	0	0	0	204341278	19959692	0	0	0	98239169
4821	35183388	0	0	0	97691901	16614098	0	0	0	124412511
4822	3365320	0	0	0	6887971	8132983	0	0	0	13552342
4823	386715831	0	0	0	506186356	119861663	0	0	0	273785712
4901	196615406	0	0	0	1108684022	149026305	0	0	0	1747277604
4902	113229050	0	0	0	251608995	84843605	0	0	0	608884659
4903	10564895	0	0	0	26980254	4037095	0	0	0	26440830
4904	470815	0	0	0	8202922	2508407	0	0	0	19019122
4905	1780004	0	0	0	12087909	1269967	0	0	0	26719801
4906	2433125	0	0	0	4462958	56778	0	0	0	11495552
4907	2829507	0	0	0	68008247	2695267	0	0	0	98642709
4908	2672635	0	0	0	32489901	2763778	0	0	0	34775107
4909	17595224	0	0	0	67239685	13077795	0	0	0	107645644
4910	4511054	0	0	0	18606800	1875807	0	0	0	12331112
4911	179637086	0	0	0	400449268	81057925	0	0	0	233802547
5001	958	0	0	0	8028	352	0	0	0	19248
5002	65562	0	0	0	1567926	43117	0	0	0	320194
5003	370384	0	0	0	2481291	247008	0	0	0	1965716
5004	489819	0	0	0	8482281	2813	0	0	0	141292
5005	1653293	0	0	0	3720918	20091	0	0	0	213217
5006	14716	0	0	0	1507938	17632	0	0	0	308753
5007	985560	0	0	0	57320244	1148181	0	0	0	40056368
5101	81955522	0	0	0	129897364	37947881	0	0	0	74604511
5102	6592129	0	0	0	125906600	2088365	0	0	0	55524820
5103	4885846	0	0	0	6703222	11895871	0	0	0	19436666
5104	396	0	0	0	7291	75832	0	0	0	140003
5105	31439060	0	0	0	46039772	9956660	0	0	0	79677572
5106	4867117	0	0	0	33706472	7582910	0	0	0	63623790
5107	11576863	0	0	0	88676803	7946922	0	0	0	70502728
5108	524801	0	0	0	15089117	725648	0	0	0	35176398
5109	418039	0	0	0	3533054	2431585	0	0	0	12893056
5110	53633	0	0	0	398313	22130	0	0	0	119947
5111	4479080	0	0	0	67099388	3661188	0	0	0	89760463
5112	1724085	0	0	0	52628261	3890013	0	0	0	141448708
5113	47028	0	0	0	361048	137134	0	0	0	2057036
5201	18354214	0	0	0	28853782	765714	0	0	0	1257245
5202	27145663	0	0	0	12180441	2126967	0	0	0	1672181
5203	1646214	0	0	0	8235237	198925	0	0	0	1152066
5204	297730	0	0	0	3469494	318019	0	0	0	3843867
5205	42543984	0	0	0	151570254	21338490	0	0	0	53495168
5206	6747215	0	0	0	19807545	402140	0	0	0	3175604
5207	1029170	0	0	0	7480955	498110	0	0	0	14006222
5208	49476770	0	0	0	255632027	12659899	0	0	0	152267177
5209	52941095	0	0	0	268160399	7390076	0	0	0	98087141
5210	18630318	0	0	0	88855346	4629926	0	0	0	29999986
5211	10479483	0	0	0	105853250	2736414	0	0	0	30466567
5212	1043159	0	0	0	14232605	262576	0	0	0	6287787
5301	5535117	0	0	0	17931076	1673699	0	0	0	3226447
5302	573653	0	0	0	451698	100300	0	0	0	282905
5303	2551359	0	0	0	1406023	68022	0	0	0	275674
5304	949208	0	0	0	935026	126034	0	0	0	383095
5305	26560658	0	0	0	26313116	454617	0	0	0	1310649
5306	3292529	0	0	0	25693101	2686124	0	0	0	30458670
5307	9293505	0	0	0	9487134	582194	0	0	0	1489152
5308	739310	0	0	0	772267	225847	0	0	0	1009542
5309	4052052	0	0	0	47142336	4334503	0	0	0	94089890
5310	18550752	0	0	0	16356545	2627041	0	0	0	3030667
5311	164494	0	0	0	1901741	764808	0	0	0	4776715
5401	2848866	0	0	0	20589288	3438023	0	0	0	46084439
5402	264188251	0	0	0	681070517	76185557	0	0	0	223044017
5403	8445049	0	0	0	32178264	720518	0	0	0	2915475
5404	6791445	0	0	0	57017823	4695209	0	0	0	16942032
5405	57429	0	0	0	149828	88723	0	0	0	531910
5406	887742	0	0	0	4346090	441891	0	0	0	3675266
5407	73960912	0	0	0	516446462	36730193	0	0	0	279029348
5408	17802239	0	0	0	101971578	2238177	0	0	0	29263126
5501	6182993	0	0	0	11109603	318616	0	0	0	1306039
5502	127589304	0	0	0	29504814	0	0	0	0	0
5503	146522123	0	0	0	203671385	49214790	0	0	0	56775945
5504	6389400	0	0	0	11275727	0	0	0	0	0
5505	14602315	0	0	0	12612220	13764762	0	0	0	10860928
5506	7160096	0	0	0	16660522	5137855	0	0	0	12721954
5507	115110	0	0	0	606677	0	0	0	0	0
5508	1286032	0	0	0	9702617	22376502	0	0	0	15088276
5509	35803094	0	0	0	135246984	4872508	0	0	0	28337276
5510	7188652	0	0	0	20148557	315634	0	0	0	1556005
5511	1632070	0	0	0	6926947	799136	0	0	0	6638443
5512	3898324	0	0	0	42371566	2073042	0	0	0	25182984
5513	37908706	0	0	0	151214847	8424566	0	0	0	44133600
5514	20433828	0	0	0	89560640	10213641	0	0	0	51623734
5515	9195206	0	0	0	85939211	10621885	0	0	0	120750530
5516	24937799	0	0	0	231949716	214695824	0	0	0	70693866
5601	15415593	0	0	0	79127959	12742323	0	0	0	90536107
5602	11226721	0	0	0	35637542	14150980	0	0	0	60308445
5603	109706095	0	0	0	316685588	36044163	0	0	0	128924461
5604	1429909	0	0	0	14868627	816790	0	0	0	9605585
5605	428458	0	0	0	6873967	223180	0	0	0	5571596
5606	941276	0	0	0	12042834	84481	0	0	0	1472863
5607	25624864	0	0	0	35258540	4548523	0	0	0	25960461
5608	4255640	0	0	0	19869596	1125461	0	0	0	16035941
5609	538357	0	0	0	3577816	397573	0	0	0	3202791
5701	5308559	1789086	0	0	74945815	1567762	551528	0	0	30919905
5702	90267175	25034053	0	0	195252412	10079772	4905811	0	0	134402635
5703	235227259	119920939	0	0	629176724	33899337	12335469	0	0	141744320
5704	27541937	20559747	0	0	43347318	4398752	1585308	0	0	10730661
5705	6977125	5119185	0	0	25606196	10591371	3660952	0	0	51199326
5801	10750639	0	0	0	118101254	2786804	0	0	0	47181222
5802	841293	0	0	0	3789356	125862	0	0	0	1031545
5803	127450	0	0	0	834189	57115	0	0	0	3691629
5804	394645	0	0	0	9741427	378255	0	0	0	12868345
5805	93437	0	0	0	2354627	87648	0	0	0	2473065
5806	8454094	0	0	0	48286368	7409721	0	0	0	64733489
5807	552653	0	0	0	13725353	3643200	0	0	0	37935238
5808	1154484	0	0	0	22537138	660459	0	0	0	15814038
5809	167382	0	0	0	1537681	42751	0	0	0	434191
5810	2871572	0	0	0	86971012	1362194	0	0	0	22675346
5811	148407	0	0	0	1115512	153676	0	0	0	1454257
5901	692523	0	0	0	3976012	836618	0	0	0	8979540
5902	10111865	0	0	0	39505359	2079989	0	0	0	12692310
5903	28475257	0	0	0	123099167	652592307	0	0	0	237772014
5904	3308462	1271140	0	0	7600440	7326926	9479941	0	0	17200638
5905	501945	0	0	0	4672256	411652	0	0	0	8488336
5906	9953799	0	0	0	31616329	4764414	0	0	0	41052313
5907	4433346	0	0	0	37762680	2686131	0	0	0	16661238
5908	82987	0	0	0	677407	170135	0	0	0	2168856
5909	548705	0	0	0	3895165	1310723	0	0	0	16714835
5910	744760	0	0	0	7887192	477456	0	0	0	8566752
5911	5553503	0	0	0	74180194	5851316	0	0	0	137203507
6001	10601897	0	0	0	50847163	4608018	0	0	0	33878697
6002	28193464	0	0	0	246718177	15773595	0	0	0	200198539
6101	3574636	0	6741984	0	59540946	990295	0	1670153	0	30806052
6102	8225121	0	14760112	0	143818314	1125439	0	1720544	0	27991118
6103	11740155	0	38055182	0	157946466	1419316	0	3942908	0	34030933
6104	27142813	0	90542368	0	542729806	4879284	0	12996205	0	131892981
6105	28988673	0	89586267	0	406869890	3406812	0	11634591	0	81215996
6106	9758562	0	39599400	0	206608533	2678977	0	10485249	0	65898224
6107	16226274	0	162634865	0	233942636	1125929	0	11672534	0	27134630
6108	28517201	0	319316565	0	489164239	1736774	0	19627153	0	58822370
6109	93631871	0	349731194	0	1155442090	13699998	0	63546278	0	273681553
6110	104940901	0	260368948	0	2023460015	18363819	0	42254652	0	545617678
6111	12426294	0	0	0	290409690	1356807	0	0	0	40567520
6112	5129744	0	0	0	137474992	1365353	0	0	0	55311460
6113	663433	0	0	0	16948448	93664	0	0	0	2590394
6114	2924455	0	0	0	75025013	629003	0	0	0	13781048
6115	24712284	0	0	0	355887361	3303727	0	0	0	80485480
6116	9102497	0	0	0	88317108	2639765	0	0	0	21427250
6117	2534280	0	0	0	37626586	10134733	0	0	0	72465476
6201	18742065	0	274871421	0	376273211	2840705	0	3175653	0	116891051
6202	17552101	0	378934325	0	392011351	13912453	0	65892313	0	114128918
6203	134100103	0	1021777099	0	1604710060	9460133	0	15205030	0	277406449
6204	135418274	0	1061834566	0	2435844809	23133724	0	40470548	0	497965291
6205	64815352	0	1274259868	0	830979205	6301564	0	20151571	0	137038975
6206	28353201	0	87126642	0	570571598	4981294	0	140154662	0	168344541
6207	6240660	0	0	0	83494357	914220	0	0	0	22098288
6208	19955567	0	0	0	180049482	1169214	0	0	0	40891053
6209	5103413	0	0	0	131910979	596345	0	0	0	17327716
6210	18115982	0	0	0	364208277	5049720	0	0	0	124465811
6211	15442114	0	0	0	304768667	2179660	0	0	0	69033981
6212	9480191	0	0	0	388386729	2220303	0	0	0	128693343
6213	533932	0	0	0	6606195	78371	0	0	0	1255820
6214	5759448	0	42307762	0	107097128	1725423	0	13025524	0	109717323
6215	1895530	0	0	0	46570731	373774	0	0	0	31494931
6216	2278764	0	0	0	23633243	964250	0	0	0	7552770
6217	1567742	0	0	0	26775501	26207067	0	0	0	400291474
6301	4790196	0	0	0	30549244	2420868	0	0	0	24784005
6302	89259237	0	0	0	649694662	12533078	0	0	0	110079407
6303	16228232	0	0	0	135160561	2001980	0	0	0	24011745
6304	14524402	0	0	0	84306510	1321318	0	0	0	12509877
6305	25566024	0	0	0	52544137	5603812	0	0	0	20764898
6306	15379709	0	0	0	76082640	2004262	0	0	0	19427855
6307	36996886	0	0	0	129638897	8600235	0	0	0	126182562
6308	171927	0	0	0	4592371	81183	0	0	0	1619266
6309	3207897	0	0	0	4763099	94682669	0	0	0	103228600
6310	15279051	0	0	0	9533913	17639169	0	0	0	10517091
6401	2920553	0	0	0	13451270	1381043	0	0	0	11813152
6402	44657736	0	0	0	429234423	2471260	0	0	0	43500864
6403	120644618	0	0	0	2104130264	21934073	0	0	0	602084979
6404	40991809	0	0	0	446740971	2934472	0	0	0	66666673
6405	11867183	0	0	0	117802365	1241250	0	0	0	25214041
6406	8506487	0	0	0	192429333	7652356	0	0	0	38092171
6501	39094	0	0	0	581079	6714	0	0	0	389814
6502	24202	0	0	0	409120	41068	0	0	0	204716
6503	70175	0	230026	0	1396332	136203	0	255431	0	1900414
6504	408152	0	0	0	6893155	74199	0	0	0	4364063
6505	8291579	0	0	0	121362013	1665638	0	0	0	35395611
6506	4915039	0	0	0	88206193	2602771	0	0	0	32070719
6507	221904	0	0	0	3063131	125548	0	0	0	2713654
6601	12631843	0	24153908	0	58555628	1224913	0	1629000	0	10607593
6602	191997	0	4245429	0	2631171	25928	0	393883	0	871513
6603	660354	0	0	0	1321076	8854339	0	0	0	16196637
6701	125103	0	0	0	2416227	53556	0	0	0	194729
6702	7434499	0	0	0	55921927	433719	0	0	0	4866310
6703	129347	0	0	0	3483749	35334	0	0	0	1786581
6704	1099586	0	0	0	20929222	209971	0	0	0	6296390
6801	48640685	0	0	0	17472981	3220566	0	0	0	1494156
6802	95958427	0	0	0	94903435	7060140	0	0	0	7167656
6803	100007421	0	0	0	48983720	14715251	0	0	0	14593675
6804	74933923	0	0	0	78208710	4787292	0	0	0	36524838
6805	19409758	0	0	0	96708325	24157646	0	0	0	156754235
6806	159594635	0	0	0	77791108	56009793	0	0	0	89932202
6807	40527579	0	0	0	27226018	42039407	0	0	0	31092355
6808	7493439	0	0	0	3749616	43961953	0	0	0	27022072
6809	107154496	0	0	0	30689582	111353276	0	0	0	39482417
6810	76198319	0	0	0	52968799	882548104	0	0	0	129955416
6811	58778567	0	0	0	21502563	57501246	0	0	0	21124470
6812	448404	0	0	0	2062867	1267160	0	0	0	11910502
6813	6294760	0	0	0	36482588	6295550	0	0	0	57420380
6814	708024	0	0	0	7721411	255291	0	0	0	4255554
6815	14019285	0	0	0	108987456	75962921	0	0	0	157313294
6901	30098288	0	0	0	13625773	48681112	0	0	0	8379130
6902	89979673	0	0	0	37376263	131131801	0	0	0	86531437
6903	8383020	0	0	0	28655572	47717239	0	0	0	155904514
6904	192081443	0	0	0	20451644	54545979	0	0	0	8733984
6905	22505638	0	0	0	9091280	13012196	0	0	0	7663154
6906	108493	0	0	0	4316491	66428666	0	0	0	26800638
6907	50567932	5082120	0	0	34480719	10118960	950159	0	0	6115229
6908	510438400	52204231	0	0	351001719	16354845	1828760	0	0	19775259
6909	3895214	0	0	0	14746914	1260734	0	0	0	22718441
6910	63567546	0	3696082	0	93145079	19454738	0	5702136	0	63128275
6911	28150374	0	0	0	92843699	10801527	0	0	0	165735857
6912	51753063	0	0	0	116017376	47834365	0	0	0	235352270
6913	139793577	0	0	0	144667541	4617942	0	0	0	51988521
6914	35599213	0	0	0	57160806	2754267	0	0	0	22281060
7001	8193604	0	0	0	1136885	26928769	0	0	0	16775938
7002	14110290	0	0	0	29772656	2067636	0	0	0	10022831
7003	5908595	0	0	0	4948200	6353170	0	0	0	4098804
7004	19124377	2853714	0	0	6489584	6957327	1604104	0	0	5861493
7005	311676469	41335290	0	0	110951356	125256018	11409210	0	0	56322320
7006	5466216	0	0	0	14560820	820734	0	0	0	8453208
7007	113277290	0	0	0	264740303	23293863	0	0	0	103254469
7008	2088300	0	0	0	10230911	3130416	0	0	0	8115474
7009	61846654	0	0	0	100362194	7866359	0	0	0	47380868
7010	245051708	0	0	0	179371513	95300509	0	0	0	68212572
7011	84400952	0	0	0	140259612	61981893	0	0	0	103291260
7012	142505	0	0	0	504819	1175724	0	0	0	3712979
7013	113020927	0	0	0	251491218	42376254	0	0	0	91478963
7014	736566	0	0	0	7046965	509602	0	0	0	4500367
7015	199038	0	0	0	2553431	0	0	0	0	0
7016	8459523	0	0	0	12303206	957036	0	0	0	4379690
7017	2595100	0	0	0	29517094	7001394	0	0	0	57316083
7018	8823586	0	0	0	26325086	21693382	0	0	0	13256143
7019	85612127	0	0	0	212863378	130478623	0	0	0	317606399
7020	3908527	0	0	0	44436160	14503370	0	0	0	53519721
7101	10068	0	0	0	61660007	7409	0	0	0	38419911
7102	28942	0	0	0	8148536247	21335	0	0	0	6617038489
7103	260535	0	0	0	78592220	61896	0	0	0	51997582
7104	11709	0	0	0	9020505	1712	0	0	0	1541652
7105	25037	0	0	0	24516345	44533	0	0	0	23150149
7106	2585548	0	0	0	486855033	3511072	0	0	0	573477439
7107	59771	0	0	0	3250030	83824	0	0	0	875096
7108	573151	0	0	0	3171865382	228273	0	0	0	1941573798
7109	12093	0	0	0	1438699	90242	0	0	0	11614072
7110	176714	0	0	0	1162387978	61367	0	0	0	1112200985
7111	2141	0	0	0	5160645	650	0	0	0	175604
7112	5906112	0	0	0	1109713101	5535793	0	0	0	99119280
7113	1229800	0	0	0	1546338003	1261734	0	0	0	819581354
7114	406974	0	0	0	33716106	318557	0	0	0	85638201
7115	93521	0	0	0	25871447	20947	0	0	0	83353403
7116	164838	0	0	0	12517595	1413628	0	0	0	9992107
7117	4088121	0	0	0	157113448	1927218	0	0	0	60835978
7118	185172	0	0	0	1740248	1401442	0	0	0	25254612
7201	134696891	0	0	0	19781460	678573	0	0	0	375004
7202	441997383	0	0	0	252210772	37328476	0	0	0	99988436
7203	843098	0	0	0	594048	942428	0	0	0	999307
7204	190581309	0	0	0	108490525	4708667053	0	0	0	517717476
7205	57330005	0	0	0	32327434	84128185	0	0	0	40998153
7206	911660	0	0	0	1274349	4186166	0	0	0	1269755
7207	450127042	0	0	0	117882738	357465950	0	0	0	106940989
7208	956670618	0	0	0	311186688	1017982438	0	0	0	269152887
7209	711224639	0	0	0	254949652	344164618	0	0	0	110134273
7210	1639654772	0	0	0	885188724	1433863394	0	0	0	804886037
7211	183922003	0	0	0	87625453	288768970	0	0	0	125771464
7212	112861927	0	0	0	82256677	113904933	0	0	0	124968471
7213	326617316	0	0	0	86668885	914115006	0	0	0	220094605
7214	564882400	0	0	0	131098674	510050069	0	0	0	104477419
7215	67534320	0	0	0	36383446	152211781	0	0	0	82713269
7216	586618658	0	0	0	198273977	907446749	0	0	0	272820215
7217	73890893	0	0	0	56969428	195563113	0	0	0	121096920
7218	47242453	0	0	0	73799496	135981239	0	0	0	168485600
7219	417809114	0	0	0	264341906	168796483	0	0	0	283055878
7220	49067841	0	0	0	87501901	39973454	0	0	0	88295914
7221	5870507	0	0	0	10473242	26790695	0	0	0	50641814
7222	53548197	0	0	0	133301710	17208623	0	0	0	46988315
7223	15901287	0	0	0	49010811	6678698	0	0	0	20814532
7224	34210920	0	0	0	15147940	32470844	0	0	0	21212589
7225	243956030	0	0	0	111468049	71589781	0	0	0	58176746
7226	35774342	0	0	0	36736909	57120840	0	0	0	49712439
7227	74121633	0	0	0	38120070	14756319	0	0	0	4799561
7228	172050882	0	0	0	131199466	216358364	0	0	0	137350703
7229	13794306	0	0	0	20836316	15877903	0	0	0	26015567
7301	23515701	0	0	0	24339807	111287977	0	0	0	61610761
7302	176815428	0	0	0	32967921	52851629	0	0	0	48200118
7303	6826451	0	0	0	6467796	112066294	0	0	0	67430078
7304	239463183	0	0	0	255608257	128912031	0	0	0	263990756
7305	79164070	0	0	0	35767507	34555551	0	0	0	17012664
7306	399158276	0	0	0	290943659	381141922	0	0	0	192657529
7307	63041365	0	0	0	240846636	47757361	0	0	0	262101397
7308	229019021	0	0	0	291045779	228045978	0	0	0	432156403
7309	6513753	0	0	0	19659498	20403310	0	0	0	58594852
7310	41801302	0	0	0	98367023	55118347	0	0	0	141417073
7311	21281630	0	0	0	50772826	13223720	0	0	0	39467936
7312	51458332	0	0	0	91489320	50036197	0	0	0	102803784
7313	3605595	0	0	0	3208928	4002298	0	0	0	5880707
7314	43326638	0	0	0	59685883	44178025	0	0	0	55578205
7315	21545410	0	0	0	85066965	16182175	0	0	0	74449527
7316	1323088	0	0	0	3074086	1773529	0	0	0	10625516
7317	52824960	0	0	0	51643911	13609710	0	0	0	23306346
7318	260022575	0	0	0	651467368	42208013	0	0	0	354781262
7319	676686	0	0	0	6582576	978669	0	0	0	12648648
7320	26417812	0	0	0	80358519	26845962	0	0	0	89305853
7321	54605359	0	0	0	190654991	7242429	0	0	0	48524881
7322	75795582	0	0	0	147734714	17501173	0	0	0	40284115
7323	58217867	0	0	0	255177110	8103160	0	0	0	39890670
7324	20160063	0	0	0	93476148	3219845	0	0	0	30903967
7325	77635130	0	0	0	92909473	78956773	0	0	0	140110911
7326	180733003	0	0	0	512513942	116759805	0	0	0	437976240
7401	3910931	0	0	0	7710326	6680319	0	0	0	6554144
7402	1083399	0	0	0	2021699	450143	0	0	0	806996
7403	359698813	0	0	0	667285085	28182763	0	0	0	51038216
7404	23558076	0	0	0	27174463	223415445	0	0	0	197213720
7405	1047953	0	0	0	2564678	3612888	0	0	0	7413539
7406	1913834	0	0	0	6436839	0	0	0	0	0
7407	36817951	0	0	0	94920951	20408055	0	0	0	49944390
7408	93800953	0	0	0	222979461	93243918	0	0	0	196636650
7409	59427586	0	0	0	172138534	23470006	0	0	0	83723528
7410	20529811	0	0	0	100848141	6350365	0	0	0	44920620
7411	51740493	0	0	0	163685348	35755627	0	0	0	92065552
7412	8103015	0	0	0	62902163	8981454	0	0	0	78331255
7413	7272815	0	0	0	34295629	5806961	0	0	0	24155931
7414	110170	0	0	0	2595130	215654	0	0	0	6164226
7415	2884222	0	0	0	23552567	1993751	0	0	0	20103319
7416	201724	0	0	0	763911	15266	0	0	0	296295
7417	270139	0	0	0	1996564	160384	0	0	0	2622283
7418	3330381	0	0	0	29160512	1586905	0	0	0	17787101
7419	5646814	0	0	0	43275309	6751042	0	0	0	61634248
7501	54843492	0	0	0	236693661	1648223	0	0	0	2778752
7502	34810799	0	0	0	216861792	26890663	0	0	0	250468347
7503	23258859	0	0	0	41338345	8602176	0	0	0	26416389
7504	2484858	0	0	0	24734014	9159280	0	0	0	102283474
7505	5072439	0	0	0	76720184	5205762	0	0	0	72540508
7506	5044302	0	0	0	61778218	3205597	0	0	0	41897623
7507	1627695	0	0	0	18381202	1467466	0	0	0	28329462
7508	1102339	0	0	0	19494467	496662	0	0	0	7987804
7601	455165025	0	0	0	730805038	353634553	0	0	0	571658073
7602	148523114	0	0	0	130674218	145393361	0	0	0	160318703
7603	4123424	0	0	0	13284394	9131003	0	0	0	21177481
7604	143611479	0	0	0	196626949	102598402	0	0	0	155638908
7605	16401354	0	0	0	32885880	11744504	0	0	0	39603462
7606	300637678	0	0	0	727056143	181584167	0	0	0	485037795
7607	61779546	0	0	0	236916117	51938063	0	0	0	178267073
7608	9217324	0	0	0	42885586	9075252	0	0	0	45119529
7609	1193032	0	0	0	11487084	717930	0	0	0	10458482
7610	46507780	0	0	0	259224729	88469021	0	0	0	104018269
7611	1631850	0	0	0	15394577	1254566	0	0	0	7413827
7612	32780270	0	0	0	128847565	572265535	0	0	0	148378895
7613	1098780	0	0	0	13412915	9938820	0	0	0	64083637
7614	910402	0	0	0	3204172	1804203	0	0	0	4760500
7615	13150955	0	0	0	92686414	2655911	0	0	0	15781289
7616	24473662	0	0	0	194200930	17395995	0	0	0	236326758
7801	245241888	0	0	0	147591620	118844520	0	0	0	64111213
7802	10886044	0	0	0	3484669	7472639	0	0	0	3563147
7803	2711578	0	0	0	3034931	243469	0	0	0	758644
7804	13155531	0	0	0	11542078	2739	0	0	0	51429
7805	8223	0	0	0	230488	82256	0	0	0	824538
7806	1802763	0	0	0	6093634	1836086	0	0	0	4316775
7901	130106128	0	0	0	174117697	33913123	0	0	0	41517785
7902	4759731	0	0	0	4019491	45950665	0	0	0	36811765
7903	568312	0	0	0	1017958	3335512	0	0	0	4628777
7904	133509	0	0	0	384245	1333989	0	0	0	2250078
7905	1922442	0	0	0	5211716	3025558	0	0	0	2705079
7906	14061	0	0	0	176630	124544	0	0	0	3663503
7907	2194716	0	0	0	8613758	2208520	0	0	0	17202640
8001	11913802	0	0	0	60633890	3177875	0	0	0	13571428
8002	383809	0	0	0	921309	1601489	0	0	0	2337515
8003	476100	0	0	0	2852067	419113	0	0	0	3323393
8004	114231	0	0	0	661752	61736	0	0	0	240904
8005	196726	0	0	0	3562024	149989	0	0	0	954339
8006	40186	0	0	0	272142	5247	0	0	0	197508
8007	850824	0	0	0	6241460	975298	0	0	0	6850605
8101	2418254	0	0	0	29552578	4869098	0	0	0	21557713
8102	942527	0	0	0	17320730	235665	0	0	0	3018624
8103	982981	0	0	0	188517799	578660	0	0	0	110942158
8104	24058601	0	0	0	45727242	31947727	0	0	0	36793918
8105	4953748	0	0	0	92660289	1642089	0	0	0	46446393
8106	1360873	0	0	0	7919694	2943599	0	0	0	11101438
8107	786864	0	0	0	673367	18556	0	0	0	177257
8108	36541009	0	0	0	254122377	13564541	0	0	0	145831039
8109	918623	0	0	0	8726624	446837	0	0	0	4927501
8110	484643	0	0	0	1237440	875296	0	0	0	722236
8111	11303639	0	0	0	13883963	38186	0	0	0	177933
8112	2291057	0	0	0	33215229	10891786	0	0	0	41206370
8113	114910	0	0	0	1531595	105911	0	0	0	1093704
8201	14924099	0	0	0	51467826	4182397	0	0	0	20783301
8202	13311097	0	0	0	145710440	5525160	0	0	0	81181625
8203	5647473	0	0	0	54477398	2954253	0	0	0	23422503
8204	10023040	0	0	0	68862564	3599043	0	0	0	29157697
8205	48942935	0	0	0	220229548	34248655	0	0	0	179823899
8206	5811760	0	0	0	30964356	1038882	0	0	0	13046550
8207	26491573	0	0	0	474655041	18551819	0	0	0	480792396
8208	12289066	0	0	0	50843365	6694212	0	0	0	52221824
8209	1231058	0	0	0	124183781	1075714	0	0	0	82339275
8210	1304523	0	0	0	8860758	419165	0	0	0	6842716
8211	22072648	0	0	0	55487587	3404518	0	0	0	31013228
8212	29896360	0	0	0	341449246	95268796	0	0	0	605918418
8213	1992204	0	0	0	19876201	1149187	0	0	0	2285888
8214	1828337	0	0	0	20492861	406753	0	0	0	8311582
8215	15374185	0	0	0	96810337	2624368	0	0	0	20382244
8301	24965766	0	0	0	241935419	5294050	0	0	0	118891718
8302	129244699	0	0	0	627211815	44222585	0	0	0	316919479
8303	9725274	0	0	0	33107358	3091111	0	0	0	11954379
8304	2357046	0	0	0	12613163	2844404	0	0	0	17786477
8305	11398424	0	0	0	26270968	2211437	0	0	0	10947910
8306	16491298	0	0	0	79720454	2200548	0	0	0	25622270
8307	2931179	0	0	0	33638156	9149279	0	0	0	98995466
8308	13227905	0	0	0	42303505	9873860	0	0	0	114721169
8309	39441312	0	0	0	147726208	35774875	0	0	0	141923467
8310	1292320	0	0	0	16962266	596580	0	0	0	10615826
8311	22969919	0	0	0	47416758	19485738	0	0	0	57912185
8401	2010500	0	0	0	24407380	728961	0	0	0	9273097
8402	4696601	0	0	0	44309973	9814790	0	0	0	117693516
8403	33359452	0	0	0	317257207	5697354	0	0	0	36536213
8404	2832383	0	0	0	16666434	10509266	0	0	0	65280441
8405	3729224	0	0	0	36875531	5490693	0	0	0	61858560
8406	5417009	0	0	0	144045670	5335771	0	0	0	122803570
8407	59305130	0	1085748	0	651579441	105386002	0	862403	0	1224925836
8408	87006915	0	363730	0	889334308	148983375	0	955495	0	1575198229
8409	255693135	0	0	0	1460226304	109449454	0	0	0	1160350671
8410	1109881	0	0	0	5792447	971480	0	0	0	22036495
8411	17001560	0	0	0	5943568501	20017002	0	0	0	9590445288
8412	17351189	0	0	0	255080327	16517410	0	0	0	271369340
8413	73204528	0	0	0	1109492746	50954498	0	0	0	1017191642
8414	106882352	0	0	0	1102991439	73896529	0	0	0	1290987011
8415	57047830	0	0	0	662827306	25648598	0	0	0	401348413
8416	4154231	0	0	0	46418260	4198543	0	0	0	76799446
8417	5083969	0	0	0	45953718	4914646	0	0	0	53125085
8418	209739279	0	0	0	985323041	121734497	0	0	0	290557127
8419	35784399	0	0	0	517802588	31154547	0	0	0	470260288
8420	1827600	0	0	0	15627354	5279198	0	0	0	28971219
8421	395017188	0	0	0	901469881	101599980	0	0	0	1135167430
8422	92200530	0	0	0	698322559	11471136	0	0	0	259423119
8423	8239503	0	0	0	131595667	9351287	0	0	0	131901564
8424	44083302	0	0	0	366201387	19157638	0	0	0	270979619
8425	17752879	0	2017010	0	108083863	7787241	0	1308422	0	101948572
8426	23168573	0	0	0	165975042	12500306	0	0	0	85957833
8427	71012491	0	136738	0	390131997	166627027	0	46878	0	873135566
8428	61061152	0	0	0	482475875	23722565	0	0	0	297340347
8429	156225279	0	304487	0	746087136	280829730	0	52559	0	1279673835
8430	11755730	0	0	0	97212257	14952913	0	0	0	126287335
8431	235536968	0	0	0	1242001574	158943621	0	0	0	1162747704
8432	27668970	0	0	0	141952086	15803442	0	0	0	80768853
8433	48725768	0	0	0	366999774	29191067	0	0	0	223637184
8434	2278256	0	0	0	34123035	3121381	0	0	0	34264074
8435	243619	0	0	0	5407087	371754	0	0	0	4467747
8436	9820984	0	0	0	73802631	6379726	0	0	0	39334921
8437	893207	0	0	0	9392440	2815635	0	0	0	48251028
8438	11563214	0	0	0	283054387	9732551	0	0	0	182504681
8439	9549428	0	0	0	82272366	10338808	0	0	0	92279747
8440	4177151	0	0	0	105471185	2877079	0	0	0	63088603
8441	10302926	0	0	0	189222985	8408827	0	0	0	180385893
8442	4208798	0	0	0	110327822	7027373	0	0	0	170232341
8443	35101040	0	0	0	806790690	30577347	0	0	0	793643527
8444	264383	0	9502	0	7050301	808946	0	4627	0	5744259
8445	1742994	0	67084	0	23206064	9359654	0	88865	0	52564906
8446	601085	0	13477	0	7974730	2200602	0	45592	0	9646203
8447	1526710	0	29068	0	46244356	5380035	0	63916	0	57218468
8448	3892765	0	0	0	85660424	6655082	0	0	0	162944579
8449	236909	0	0	0	4222603	231896	0	0	0	2886814
8450	142780447	0	0	0	495018217	13624434	0	0	0	46193319
8451	13255961	0	0	0	109115614	22468323	0	0	0	124776867
8452	5532462	0	0	0	82489271	2969646	0	0	0	49338170
8453	639050	0	0	0	9521126	1306061	0	0	0	18862086
8454	6777531	0	0	0	53688938	10922954	0	0	0	51899231
8455	9104026	0	0	0	36898636	32057602	0	0	0	106487338
8456	3238458	0	5190	0	134596189	1402129	0	800	0	83158150
8457	11732642	0	2698	0	204187375	13895376	0	1885	0	204451313
8458	11559345	0	10556	0	179157271	11266516	0	6103	0	122885326
8459	9011164	0	308900	0	103107869	6368913	0	41105	0	58191110
8460	4035928	0	255955	0	78521115	4194441	0	15410	0	78369080
8461	3894253	0	102204	0	55385658	2512740	0	4209	0	30819153
8462	18556239	0	90462	0	198027253	11911999	0	104792	0	106126006
8463	1415708	0	37683	0	22708299	1419513	0	16284	0	25069122
8464	3697566	0	0	0	61812436	978920	0	0	0	17402585
8465	19306435	0	783500	0	191073771	4246509	0	41306	0	46515418
8466	104221446	0	0	0	470549049	17936308	0	0	0	504515840
8467	6905210	0	0	0	166567904	2487180	0	0	0	96551481
8468	753289	0	0	0	19699471	944396	0	0	0	20066908
8469	99748	0	13102	0	2793671	3209303	0	500939	0	14246969
8470	39593709	0	21408428	0	177353007	1657715	0	1871408	0	107203174
8471	442984650	0	1472804165	0	18765749445	531928024	0	743769855	0	14494134635
8472	24991667	0	511694	0	169538250	25461266	0	177082	0	618048995
8473	170579838	0	0	0	13681477325	50444325	0	0	0	6734187150
8474	29895857	0	0	0	183258750	87176961	0	0	0	453666292
8475	11357193	0	0	0	70056283	3280896	0	0	0	70469479
8476	10792221	0	0	0	138087780	4537286	0	0	0	137627343
8477	35437474	0	0	0	413091757	17718489	0	0	0	244887007
8478	1022836	0	0	0	34356448	10579131	0	0	0	132670915
8479	62536056	0	0	0	1146388229	51684114	0	0	0	1159651429
8480	10716403	0	0	0	218084265	6504578	0	0	0	130278549
8481	130959716	0	0	0	1285787261	60892737	0	0	0	1058670843
8482	56776569	0	0	0	597482873	36967292	0	0	0	529633298
8483	92591753	0	0	0	702412786	195202487	0	0	0	632675621
8484	4708654	0	0	0	117617180	4340746	0	0	0	183514055
8485	10239591	0	0	0	152907657	9740419	0	0	0	364297864
8501	77504935	0	79952597	0	775326559	56372029	0	2553895	0	551974864
8502	16305695	0	2120692	0	170136902	78989240	0	148205	0	686582371
8503	16316654	0	0	0	126717984	36878563	0	0	0	203838321
8504	106986836	0	0	0	1821049177	34452045	0	0	0	1288379352
8505	11190407	0	0	0	98821538	8159285	0	0	0	286920089
8506	44992804	0	0	0	247143388	8730945	0	0	0	145685373
8507	119079580	0	0	0	713124053	113918525	0	0	0	466810045
8508	66225846	0	0	0	523370777	32370049	0	0	0	408276316
8509	48862627	0	0	0	381133646	19197996	0	0	0	175708048
8510	7948154	0	0	0	105286156	949229	0	0	0	19107401
8511	50833285	0	0	0	404764486	42248435	0	0	0	478644521
8512	23846940	0	0	0	272129852	17602534	0	0	0	200490474
8513	7591745	0	0	0	53858187	1027861	0	0	0	15771411
8514	6216737	0	0	0	110121517	9191168	0	0	0	160241575
8515	13145548	0	0	0	282577661	6963988	0	0	0	202627532
8516	217482934	0	0	0	1131040812	88433546	0	0	0	605946663
8517	58652930	0	0	0	8394133939	38674806	0	0	0	7407863362
8518	79186017	0	0	0	708968103	63910279	0	0	0	549229386
8519	14177827	0	9730502	0	375786610	1325957	0	1026867	0	61755125
8520	5491009	0	5257545	0	297328401	717598	0	713472	0	48563415
8521	21975421	0	4772276	0	782375480	10382402	0	2272003	0	332701743
8522	29844381	0	0	0	293426847	2949553	0	0	0	91261174
8523	75965441	0	0	0	716634652	27411529	0	0	0	347350063
8524	107838164	0	0	0	1922401195	79513549	0	0	0	1289057225
8525	141770533	0	48114145	0	5710384643	30908448	0	380189404	0	6859916438
8526	1365438	0	0	0	306286321	422361	0	0	0	168783663
8527	94734648	0	30388699	0	1382756320	4505488	0	2382055	0	161218516
8528	125449069	0	11607063	0	1713738726	94109159	0	6877285	0	1346597050
8529	68833336	0	0	0	1600711978	401664912	0	0	0	1598658995
8530	467042	0	0	0	23584508	2217134	0	0	0	51985048
8531	15728511	0	0	0	789169536	7785597	0	0	0	463746096
8532	15291950	0	0	0	993100777	8244562	0	0	0	845776052
8533	6317097	0	0	0	264537118	5337717	0	0	0	266415618
8534	21334211	0	0	0	1227509055	5905936	0	0	0	801251032
8535	4546294	0	0	0	119479388	10121645	0	0	0	195397765
8536	103649412	0	0	0	2173394575	123615283	0	0	0	1619026923
8537	8925470	0	0	0	373311664	4647415	0	0	0	286785451
8538	22273435	0	0	0	399642331	11959271	0	0	0	461689047
8539	34321919	0	0	0	461591368	28255015	0	0	0	438409223
8540	115718255	0	0	0	1010550113	133672432	0	0	0	804554274
8541	11980204	0	0	0	1627456900	5555179	0	0	0	1075134221
8542	14773825	0	0	0	10492647387	9444586	0	0	0	7528607181
8543	13582914	0	0	0	1326771123	12089990	0	0	0	1948253475
8544	276323733	0	0	0	1797490586	163083235	0	0	0	1094814572
8545	16216746	0	0	0	44442541	7079564	0	0	0	35749146
8546	5661989	0	0	0	54999315	7229294	0	0	0	110775497
8547	6574812	0	0	0	58234651	5761714	0	0	0	54726435
8548	36379705	0	0	0	442930842	6576905	0	0	0	137730306
8601	17505	0	37	0	128281	636247	0	39	0	27919017
8602	13429504	0	0	0	234738522	266025	0	0	0	3525917
8603	2469339	0	60	0	77877151	271581	0	275	0	8242808
8604	1205010	0	147425	0	22885428	128970	0	2699	0	1301497
8605	615502	0	29	0	10885509	58615	0	440	0	916597
8606	14268742	0	283	0	48643118	726089	0	390	0	2928824
8607	34117381	0	0	0	221218726	10818322	0	0	0	108764861
8608	3173807	0	0	0	23449065	3911580	0	0	0	21665789
8609	1341784	0	1846015	0	8330190	9109305	0	2615	0	19184491
8701	97580685	0	23287	0	660880239	212091833	0	56673	0	1247584128
8702	9956368	0	1508	0	119686269	25783304	0	11714	0	248186626
8703	2249587444	0	1911393	0	23450407484	1500445867	0	1082331	0	14132799579
8704	419615254	0	234938	0	3403944585	196095898	0	79914	0	1158494233
8705	10466275	0	408	0	83066035	5130754	0	361	0	36523978
8706	47039226	0	17858	0	344775374	4157533	0	10539	0	44917135
8707	13663020	0	250996	0	123817954	10450702	0	300655	0	78451291
8708	1944783407	0	0	0	9473303164	1243621189	0	0	0	7447357701
8709	1339221	0	0	0	11480963	1912275	0	0	0	16044122
8711	44719794	0	298356	0	958845720	8670085	0	34135	0	168498875
8712	39435016	0	2836606	0	220703925	3741583	0	236654	0	26773398
8713	3727011	0	280328	0	46653384	2302825	0	42854	0	44226690
8714	31622987	0	0	0	283083884	5302828	0	0	0	85677111
8715	15301451	0	0	0	99082166	2125120	0	0	0	16906919
8716	156483799	0	0	0	473303799	138800629	0	0	0	517871446
8804	59520	0	0	0	3731068	48987	0	0	0	11209819
8901	179997139	0	0	0	815457307	389263	0	0	0	4788192
8902	83114	0	10	0	603522	39169	0	14	0	367896
8903	11278512	0	132165	0	163296536	16529868	0	28395	0	489426372
8904	610000	0	0	0	9607462	16000	0	0	0	118046
8905	953165	0	63	0	12993072	12803608	0	108	0	291997798
8906	1040083	0	619	0	18213183	857094	0	105	0	14599771
8907	2367466	0	0	0	16122935	9566582	0	0	0	110419710
9001	5923339	0	0	0	708928783	2780546	0	0	0	513808909
9002	4143076	0	0	0	180743896	407052	0	0	0	72694725
9003	35667630	0	0	0	136419461	176822	0	0	0	30302820
9004	9061930	0	40614394	0	125995120	980773	0	14841568	0	46615399
9005	1683395	0	0	0	49494504	173058	0	0	0	19518239
9006	7180055	0	0	0	459947852	4637990	0	0	0	176084870
9007	515803	0	0	0	59789756	156386	0	0	0	34974755
9008	1249802	0	0	0	56211115	622359	0	0	0	76856785
9009	54406842	0	0	0	1132402168	35225072	0	0	0	1062347470
9010	3243429	0	0	0	194721743	1841046	0	0	0	64029041
9011	515388	0	0	0	50910882	464961	0	0	0	34554654
9012	200685	0	0	0	24969725	291067	0	0	0	41185697
9013	1426277	0	0	0	578898004	623162	0	0	0	223098680
9014	5369185	0	0	0	1072615718	2245316	0	0	0	1242638690
9015	1633559642	0	0	0	374089499	11945536	0	0	0	389213378
9016	167273	0	0	0	9719751	97113	0	0	0	6430921
9017	4062023	0	0	0	61554165	4026879	0	0	0	46819802
9018	55005489	0	0	0	1448167413	21987986	0	0	0	1122439214
9019	9989480	0	0	0	107328904	2374096	0	0	0	269666657
9020	635433	0	0	0	47602414	1606193	0	0	0	88664112
9021	3517030	0	0	0	577302277	14702825	0	0	0	598974387
9022	2524981	0	0	0	215429712	3174057	0	0	0	223526302
9023	9752116	0	0	0	100406100	2377370	0	0	0	97577277
9024	1304712	0	0	0	62741216	2872662	0	0	0	188385113
9025	1725834	0	0	0	49227530	3722662	0	0	0	63531474
9026	7242170	0	0	0	348426758	38668638	0	0	0	439794867
9027	5345630	0	0	0	695837084	20378539	0	0	0	960045625
9028	3243185	0	0	0	64037794	3440220	0	0	0	98417012
9029	2949335	0	0	0	88343375	3073537	0	0	0	190947801
9030	3279549	0	0	0	827230575	2954840	0	0	0	1177879407
9031	10694754	0	0	0	690300490	6992298	0	0	0	775327568
9032	41440463	0	0	0	668450040	6538563	0	0	0	641477520
9033	1714583	0	0	0	134391253	5819183	0	0	0	263268254
9101	371691	0	14187002	0	225450374	87544	0	486305	0	96931953
9102	3610123	0	36399613	0	339770714	592222	0	5341606	0	74619792
9103	261931	0	1225429	0	11149568	154103	0	671632	0	4699012
9104	75380	0	728993	0	7038933	32960	0	45023	0	1875677
9105	8326692	0	22666725	0	84024318	850559	0	1114290	0	18184561
9106	878469	0	5599835	0	21299901	55129	0	76693	0	5038670
9107	915756	0	3312204	0	27551870	167100	0	403538	0	7872061
9108	241367	0	11908090	0	4381684	4326	0	34730	0	594821
9109	168594	0	918995	0	2091389	28076	0	40505	0	772896
9110	35767	0	0	0	2888159	25348	0	0	0	2365745
9111	37374	0	0	0	1740586	3312	0	0	0	621244
9112	117143	0	0	0	1170874	6159	0	0	0	188272
9113	166493	0	0	0	11927374	25144	0	0	0	2228215
9114	200115	0	0	0	22346482	76187	0	0	0	9179816
9201	1865672	0	23102	0	25182412	247604	0	2253	0	6121228
9202	1131413	0	606026	0	26563082	170959	0	45282	0	10396873
9203	58024	0	21505	0	1122394	47259	0	7729	0	1443061
9204	425861	0	449099	0	1587677	16243	0	11776	0	368502
9205	649009	0	1085188	0	30255700	150596	0	62685	0	17014267
9206	1622329	0	1384158	0	15851077	542638	0	54266	0	9044962
9207	5353918	0	960624	0	113803553	356473	0	62035	0	11938694
9208	626232	0	5643660	0	5428992	133356	0	325400	0	2789007
9209	3471624	0	0	0	49520022	2421293	0	0	0	32961437
9303	82581	0	22967	0	21577518	30108	0	6037	0	24063803
9304	421633	0	653198	0	11386380	181417	0	15890	0	5948965
9305	530250	0	0	0	13712205	76007	0	0	0	9424903
9306	13868109	0	0	0	58925017	8885095	0	0	0	51104512
9401	266355530	0	0	0	1333327741	72448221	0	0	0	477516088
9402	5351659	0	0	0	55422421	2999379	0	0	0	47502073
9403	954411430	0	0	0	2210675402	284938897	0	0	0	981749586
9404	22803370	0	0	0	130185151	13368170	0	0	0	71800877
9405	134712796	0	0	0	786140334	31733040	0	0	0	328436875
9406	20270640	0	0	0	53569490	53159678	0	0	0	134639534
9501	18064146	0	0	0	92960901	1040951	0	0	0	10156626
9502	27856706	0	0	0	225081173	2206085	0	0	0	20201199
9503	191051700	0	0	0	1419255539	27858526	0	0	0	263599460
9504	152236072	0	0	0	869774636	23258468	0	0	0	468251021
9505	49749316	0	0	0	276037918	4351206	0	0	0	41948964
9506	104263115	0	0	0	712049434	45436388	0	0	0	282505416
9507	2563185	0	0	0	53010243	6234174	0	0	0	37247260
9508	2953860	0	0	0	25814809	1994759	0	0	0	32969844
9601	169873	0	0	0	1407019	3594	0	0	0	148166
9602	1100119	0	0	0	13957752	307346	0	0	0	3167441
9603	28144143	0	0	0	187736308	8908545	0	0	0	88094519
9604	43056	0	0	0	256313	63886	0	0	0	2672147
9605	3712545	0	0	0	32943798	340336	0	0	0	3866721
9606	1658209	0	0	0	23372474	1230291	0	0	0	17169074
9607	2368936	0	0	0	24070946	4056874	0	0	0	31932543
9608	23226707	0	0	0	255620055	7596463	0	0	0	157254778
9609	7255561	0	0	0	38132831	1824972	0	0	0	11935231
9610	2545412	0	0	0	12356315	420954	0	0	0	3202546
9611	665993	0	0	0	11512090	217007	0	0	0	5478898
9612	6758148	0	0	0	151523262	5624636	0	0	0	110856507
9613	3720797	0	0	0	37059537	269435	0	0	0	9086318
9614	85779	0	0	0	2509458	23010	0	0	0	2213949
9615	3484714	0	0	0	43126505	767745	0	0	0	15703338
9616	8519184	0	0	0	58807002	1598554	0	0	0	19415524
9617	3664032	0	0	0	22497684	1391397	0	0	0	10598582
9618	677077	0	0	0	12799578	620443	0	0	0	15642136
9701	695774	0	0	0	1861958643	501668	0	0	0	1858968823
9702	74833	0	0	0	48663862	142893	0	0	0	45300284
9703	660999	0	0	0	149283194	560088	0	0	0	188536888
9704	90164	0	0	0	53337978	149316	0	0	0	49890023
9705	1438299	0	0	0	115012558	298419	0	0	0	128636501
9706	3055679	0	0	0	540805044	8597162	0	0	0	995923838
9999	0	0	0	0	26413250412	0	0	0	0	23097290136

## Sheet: Comtrade2001
Commodity Code	Import(Weight)	Import(Area)	Import(Quantity Number)	Import(Volume)	Import(Trade Value)	Export(Weight)	Export(Area)	Export(Quantity Number)	Export(Volume)	Export(Trade Value)
101	1642945	0	6291	0	438901820	2607544	0	5972	0	418614959
102	6536880	0	34157	0	13344947	4844	0	23	0	13041
103	4643199	0	63895	0	6061002	3133859	0	34575	0	3649745
104	345080	0	0	0	1526500	9307843	0	0	0	5563967
105	579691	0	0	0	7089427	5130614	0	0	0	87836321
106	476375	0	1013310278	0	13410007	539559	0	153146245	0	9712020
201	128904451	0	0	0	434573263	3843364	0	0	0	22686076
202	72237775	0	0	0	171228865	1752536	0	0	0	6445055
203	241635263	0	0	0	486831887	37190736	0	0	0	55579709
204	93807906	0	0	0	282782370	32844482	0	0	0	120200918
205	81283	0	0	0	28719	2417483	0	0	0	5330365
206	48650644	0	0	0	42461754	8391177	0	0	0	4917770
207	297076028	0	0	0	833140060	219816018	0	0	0	237319176
208	1214229	0	0	0	4460101	2613641	0	0	0	10840570
209	29563143	0	0	0	17905918	2777160	0	0	0	1380855
210	317169400	0	0	0	901030837	9053571	0	0	0	32896674
301	1799320	0	0	0	24912595	799304	0	0	0	6334315
302	83223306	0	0	0	182313247	95977560	0	0	0	266505384
303	66684291	0	0	0	134282879	134657491	0	0	0	117773444
304	178266830	0	0	0	640676346	32770456	0	0	0	112598363
305	3413451	0	0	0	15397014	6897282	0	0	0	53433110
306	41757941	0	0	0	299147834	53974562	0	0	0	296757110
307	11329894	0	0	0	33862480	36328136	0	0	0	108555278
401	113270128	0	0	0	58141396	150090950	0	0	0	144388201
402	45727432	0	0	0	80464872	138100475	0	0	0	237169721
403	174499855	0	0	0	143259455	17660224	0	0	0	30438492
404	28460075	0	0	0	28121173	44501949	0	0	0	37564594
405	114833962	0	0	0	351707416	41150229	0	0	0	116162843
406	348016914	0	0	0	1004864580	473310083	0	0	0	216200029
407	44631786	0	0	0	43974773	7627411	0	0	0	29063975
408	7308850	0	0	0	16794184	2716920	0	0	0	3459632
409	33690457	0	0	0	36515773	627941	0	0	0	1804264
410	30088	0	0	0	332590	9353	0	0	0	127368
501	6217	0	0	0	358707	502	0	0	0	49282
502	1537150	0	0	0	14170663	1189070	0	0	0	11620754
503	103357	0	0	0	1016914	88076	0	0	0	585224
504	3798759	0	0	0	6106987	7882175	0	0	0	16602638
505	2784282	0	0	0	8636497	1860696	0	0	0	4327424
506	43478226	0	0	0	18242189	3386058	0	0	0	3212269
507	3232694	0	0	0	1368161	11017	0	0	0	111538
508	1727234	0	0	0	1419157	3581859	0	0	0	5321608
509	46941	0	0	0	246194	84844	0	0	0	765895
510	14130	0	0	0	283953	71	0	0	0	35558
511	67422796	0	0	0	42753673	22545887	0	0	0	12886178
601	16022519	0	0	0	57437325	9846767	0	0	0	10237170
602	539844799	0	0	0	290533266	30383708	0	0	0	14202666
603	113229044	0	0	0	590934304	7391960	0	0	0	30407476
604	9912391	0	0	0	29134037	882246	0	0	0	3448440
701	550047533	0	0	0	145827937	161272803	0	0	0	60662574
702	307321395	0	0	0	347993875	4729083	0	0	0	6063565
703	263708689	0	0	0	109727280	10283571	0	0	0	8709686
704	155365144	0	0	0	139891056	4410976	0	0	0	5222332
705	175906858	0	0	0	159655530	4092970	0	0	0	5598374
706	132596136	0	0	0	65076555	23046455	0	0	0	6998372
707	81137639	0	0	0	76088747	713329	0	0	0	733480
708	37381577	0	0	0	76710187	52740997	0	0	0	12918236
709	327577673	0	0	0	569153993	2906279	0	0	0	5835635
710	775525929	0	0	0	243685330	66583981	0	0	0	51669488
711	15414965	0	0	0	11948013	473824	0	0	0	1070390
712	29759426	0	0	0	53895505	1938870	0	0	0	7245142
713	135882406	0	0	0	70065678	180579170	0	0	0	39301040
714	22968551	0	0	0	19635877	749024	0	0	0	1401434
801	36887887	0	0	0	67212875	1564235	0	0	0	3797860
802	35771891	0	0	0	98720260	4080397	0	0	0	8759733
803	769851056	0	0	0	451338316	1824092	0	0	0	2166362
804	99533040	0	0	0	111443811	2191769	0	0	0	3511237
805	707267663	0	0	0	424307503	30418333	0	0	0	17578378
806	273366190	0	0	0	403824993	6000122	0	0	0	10701874
807	162979585	0	0	0	106885210	6902315	0	0	0	6734319
808	575277097	0	0	0	447925422	21715260	0	0	0	14936624
809	282446275	0	0	0	204918825	1826656	0	0	0	3000317
810	81666705	0	0	0	135789920	1191045	0	0	0	2638031
811	47602012	0	0	0	59395035	2976545	0	0	0	4783213
812	27616841	0	0	0	22123066	1083895	0	0	0	1084415
813	30160261	0	0	0	70621929	6155591	0	0	0	7585435
814	1910100	0	0	0	1946500	101444	0	0	0	488304
901	136229351	0	0	0	209880086	10295581	0	0	0	39202228
902	163853217	0	0	0	288942934	27275750	0	0	0	169932434
903	37391	0	0	0	71867	892	0	0	0	33688
904	12497200	0	0	0	28799105	1476650	0	0	0	7098168
905	366114	0	0	0	16614670	159502	0	0	0	16287304
906	1189189	0	0	0	1759726	89428	0	0	0	403125
907	638957	0	0	0	1607842	95293	0	0	0	566961
908	776750	0	0	0	6385589	314011	0	0	0	3314187
909	7273440	0	0	0	12322369	729625	0	0	0	1932363
910	23179613	0	0	0	28712124	4393915	0	0	0	15405423
1001	1305643975	0	0	0	210173816	1699264917	0	0	0	201123977
1002	1049878	0	0	0	231416	7564637	0	0	0	555744
1003	126194220	0	0	0	21564349	684094097	0	0	0	86152226
1004	3709501	0	0	0	962382	117457320	0	0	0	13946056
1005	1571288863	0	0	0	223711196	8167808	0	0	0	2652871
1006	677010974	0	0	0	328046035	34252933	0	0	0	32197861
1007	4327680	0	0	0	1069065	17272	0	0	0	40023
1008	28393645	0	0	0	8299815	245415	0	0	0	341688
1101	53141053	0	0	0	14528726	96897808	0	0	0	29623846
1102	25577616	0	0	0	10746690	3877407	0	0	0	2447739
1103	22600788	0	0	0	6483271	16658036	0	0	0	5069341
1104	32009041	0	0	0	13715845	114559705	0	0	0	51288599
1105	24589042	0	0	0	21720854	3797360	0	0	0	3025885
1106	1094045	0	0	0	2172433	1096217	0	0	0	1421966
1107	20025272	0	0	0	6831027	414583210	0	0	0	127072045
1108	122672691	0	0	0	55230365	18573091	0	0	0	6634541
1109	30935432	0	0	0	20559781	1346884	0	0	0	737053
1201	879778075	0	0	0	183548683	2009410	0	0	0	630512
1202	115958965	0	0	0	78101880	1076877	0	0	0	1767294
1203	11529792	0	0	0	1185731	29506	0	0	0	10361
1204	25717968	0	0	0	7060887	46376588	0	0	0	6430959
1205	604852693	0	0	0	133293125	14930697	0	0	0	2838443
1206	27335769	0	0	0	9876274	150714	0	0	0	264002
1207	71885754	0	0	0	22732463	1240624	0	0	0	2022411
1208	11402975	0	0	0	5786300	5172859	0	0	0	2324620
1209	37759214	0	0	0	86456503	3130765	0	0	0	35820565
1210	1161096	0	0	0	5658225	705632	0	0	0	2836650
1211	7106463	0	0	0	35068665	500274	0	0	0	5438437
1212	26811291	0	0	0	16532495	988827	0	0	0	3884433
1213	23211817	0	0	0	1488209	239598	0	0	0	255389
1214	25265839	0	0	0	7674717	394297	0	0	0	237430
1301	7496887	0	0	0	15183631	4281564	0	0	0	13173219
1302	23447921	0	0	0	87434314	6154857	0	0	0	28702980
1401	12876378	0	0	0	7289685	52255	0	0	0	463608
1402	14612	0	0	0	41724	922	0	0	0	5203
1403	232408	0	0	0	509474	480	0	0	0	5899
1404	6586836	0	0	0	6256177	304734	0	0	0	357789
1501	34018558	0	0	0	14465332	7938506	0	0	0	2527840
1502	38379170	0	0	0	17956526	16707471	0	0	0	5173698
1503	9590638	0	0	0	3373248	11016479	0	0	0	2827022
1504	60530334	0	0	0	36286045	1679832	0	0	0	5609402
1505	5711396	0	0	0	10265145	3155344	0	0	0	14022747
1506	71040	0	0	0	166382	2824287	0	0	0	1598465
1507	42905579	0	0	0	16923709	13661102	0	0	0	7777681
1508	5089627	0	0	0	4058297	1514521	0	0	0	1688898
1509	36434964	0	0	0	81856679	3554580	0	0	0	12702743
1510	5209665	0	0	0	8207700	486617	0	0	0	807451
1511	729600818	0	0	0	203698349	33507976	0	0	0	17011503
1512	141676302	0	0	0	82004137	12244788	0	0	0	7422983
1513	110434485	0	0	0	39162540	2487421	0	0	0	1733209
1514	199072938	0	0	0	81490033	47273580	0	0	0	32094743
1515	14459499	0	0	0	28746547	16680907	0	0	0	19204036
1516	40907867	0	0	0	59849352	53867097	0	0	0	35236086
1517	56981261	0	0	0	64176752	52532032	0	0	0	59230174
1518	11755154	0	0	0	6444404	11386039	0	0	0	10084196
1520	38958656	0	0	0	32659065	7796305	0	0	0	3761076
1521	952287	0	0	0	4144893	228764	0	0	0	710328
1522	51645	0	0	0	186319	545934	0	0	0	446798
1601	67179881	0	0	0	138489694	2045347	0	0	0	5688700
1602	277290599	0	0	0	838523145	28029613	0	0	0	112672110
1603	1457400	0	0	0	4687217	237682	0	0	0	1755231
1604	219473303	0	0	0	580094743	22214918	0	0	0	74616037
1605	50910658	0	0	0	276593348	5940611	0	0	0	33919204
1701	1348331899	0	0	0	670708756	631570702	0	0	0	194585157
1702	262759497	0	0	0	109962253	144625560	0	0	0	54421910
1703	883586254	0	0	0	89677366	54656890	0	0	0	9293628
1704	93725858	0	0	0	228061135	75596145	0	0	0	252959284
1801	149930450	0	0	0	181285145	820179	0	0	0	859442
1802	6530391	0	0	0	358055	6611	0	0	0	23666
1803	10627190	0	0	0	17315758	16968588	0	0	0	22448593
1804	41118889	0	0	0	83074876	9050009	0	0	0	12349227
1805	6344168	0	0	0	10120195	29145244	0	0	0	11874183
1806	190275737	0	0	0	577236283	136595031	0	0	0	454103331
1901	103628935	0	0	0	229344345	137099724	0	0	0	185140699
1902	202107151	0	0	0	181503273	14330337	0	0	0	27607944
1903	1895434	0	0	0	610178	186490	0	0	0	1748073
1904	52351961	0	0	0	93513888	160280612	0	0	0	367362488
1905	337098946	0	0	0	793572785	300509301	0	0	0	591859527
2001	37021170	0	0	0	39011461	6371108	0	0	0	11139035
2002	375841957	0	0	0	177005302	2383056	0	0	0	2409568
2003	9278097	0	0	0	13622407	200064	0	0	0	382463
2004	285579833	0	0	0	176536901	34875621	0	0	0	40218354
2005	362847913	0	0	0	244458179	62447080	0	0	0	90233438
2006	9975169	0	0	0	22603002	716659	0	0	0	1795013
2007	33887700	0	0	0	58355128	16225857	0	0	0	35121909
2008	254742017	0	0	0	247127138	16288024	0	0	0	36158490
2009	426184592	0	0	0	361502550	44074024	0	0	0	45603459
2101	21412993	0	0	0	121021901	25586040	0	0	0	119982417
2102	27552857	0	0	0	22675668	18257715	0	0	0	51627753
2103	252156186	0	0	0	300746765	76630159	0	0	0	133395873
2104	26323219	0	0	0	53858961	25158945	0	0	0	49583253
2105	64153339	0	0	0	161071922	35495831	0	0	0	67548542
2106	127954107	0	0	0	493042834	127545733	0	0	0	427098694
2201	504016196	0	0	488325695	154131543	27748580	0	0	25344350	12984649
2202	336267664	0	0	316917106	334706162	311566765	0	0	294903188	206081024
2203	489178361	0	0	486650725	332011946	332079543	0	0	312439346	368113199
2204	1489715903	0	0	1367144525	3675347845	25650648	0	0	19496247	169248825
2205	14928171	0	0	14427969	25025166	1070757	0	0	1151830	4336730
2206	21506657	0	0	18324181	30490338	32080580	0	0	30004304	33518982
2207	67308034	0	0	143003319	37600716	180120475	0	0	226649011	90776812
2208	214536569	0	0	68740165	737133075	795484735	0	0	361220177	3957788234
2209	13210845	0	0	11771884	12512091	3606014	0	0	2534393	3415393
2301	254763326	0	0	0	132368404	17590730	0	0	0	15424036
2302	86083467	0	0	0	11525037	17673484	0	0	0	2603469
2303	355588445	0	0	0	41919471	61882998	0	0	0	9108695
2304	1469851104	0	0	0	317024368	11439669	0	0	0	3094918
2305	23622586	0	0	0	3991772	8205	0	0	0	26448
2306	1157567462	0	0	0	121884417	127314618	0	0	0	17321472
2307	4982547	0	0	0	1029695	7100	0	0	0	505167
2308	234697899	0	0	0	20178758	21780579	0	0	0	3100730
2309	1312356208	0	0	0	497913933	314158399	0	0	0	359765641
2401	182128445	0	0	0	526261765	10564358	0	0	0	24883182
2402	6862485	0	0	0	177286483	123019361	0	0	0	1171622304
2403	17007658	0	0	0	63979246	17039873	0	0	0	154402754
2501	246875481	0	0	0	14345297	305747915	0	0	0	25455752
2502	218734	0	0	0	212401	132012	0	0	0	78673
2503	8048064	0	0	0	683457	1532878	0	0	0	903928
2504	22535800	0	0	0	14499316	2522045	0	0	0	3951584
2505	148163428	0	0	0	12614291	223466094	0	0	0	10779854
2506	3032745	0	0	0	4429581	274024	0	0	0	411678
2507	98305565	0	0	0	13308304	3124115555	0	0	0	323678323
2508	358845981	0	0	0	56027432	92723964	0	0	0	36122268
2509	3604177	0	0	0	453911	23753310	0	0	0	2726705
2510	9225315	0	0	0	2043446	320139	0	0	0	128901
2511	77484840	0	0	0	5253548	3110617	0	0	0	1243636
2512	32596757	0	0	0	8508336	1339514	0	0	0	1625448
2513	18035225	0	0	0	4726803	3096581	0	0	0	2326404
2514	28121690	0	0	0	10211313	738135	0	0	0	655046
2515	10008586	0	0	0	10869987	3741342	0	0	0	1075987
2516	1811217457	0	0	0	47018120	5307616	0	0	0	1877422
2517	644728315	0	0	0	20070647	13616064296	0	0	0	71337720
2518	191975719	0	0	0	5378383	129429750	0	0	0	6707597
2519	142027110	0	0	0	26335224	40368329	0	0	0	26413974
2520	759849336	0	0	0	22722886	31026686	0	0	0	11169810
2521	7378865	0	0	0	1444527	83366104	0	0	0	3106528
2522	3772274	0	0	0	539379	119645101	0	0	0	13806456
2523	850643663	0	0	0	50313314	489187980	0	0	0	65210397
2524	346868	0	0	0	1025391	857	0	0	0	4319
2525	11618097	0	0	0	3412469	3740651	0	0	0	3250621
2526	83185434	0	0	0	19514341	3923604	0	0	0	1763858
2527	138004	0	0	0	100948	136643	0	0	0	134578
2528	16889460	0	0	0	3790912	184430	0	0	0	66833
2529	120218570	0	0	0	13072763	2199811	0	0	0	594632
2530	609074995	0	0	0	35858130	22182216	0	0	0	18838174
2601	15428161505	0	0	0	359906795	5257641	0	0	0	615418
2602	2677901	0	0	0	758693	713876	0	0	0	549392
2603	779477	0	0	0	2140465	142281	0	0	0	147818
2604	0	0	0	0	0	310	0	0	0	7918
2605	491	0	0	0	11321	0	0	0	0	0
2606	264710519	0	0	0	17053775	0	0	0	0	0
2607	13820815	0	0	0	1792219	39069	0	0	0	63803
2608	215429007	0	0	0	47716518	72438	0	0	0	122820
2609	5573	0	0	0	2695	53901	0	0	0	745050
2610	135543800	0	0	0	8952024	170371	0	0	0	78899
2611	689	0	0	0	94528	10558	0	0	0	48629
2613	17029682	0	0	0	49511499	272463	0	0	0	952689
2614	222972108	0	0	0	57576712	0	0	0	0	0
2615	46576542	0	0	0	24296032	1885193	0	0	0	1742054
2616	385329	0	0	0	366832940	19121	0	0	0	6211478
2617	98584	0	0	0	464835	79062	0	0	0	269473
2618	306247808	0	0	0	8412791	18937184	0	0	0	2601701
2619	123819240	0	0	0	47412201	372865	0	0	0	281732
2620	40373790	0	0	0	639158466	25102517	0	0	0	111640459
2621	98053900	0	0	0	11800071	27003583	0	0	0	14750692
2701	36865257464	0	0	0	1760561488	626309998	0	0	0	54499801
2702	918158	0	0	0	109722	3066541	0	0	0	451394
2703	398448588	0	0	0	35138150	26014482	0	0	0	2912508
2704	223347005	0	0	0	23698062	338704501	0	0	0	31176370
2705	0	0	0	0	0	60562	0	0	0	193091
2706	4534962	0	0	0	659283	42225458	0	0	0	7080350
2707	330454530	0	0	0	84383693	808817754	0	0	0	181919015
2708	7097403	0	0	0	1500948	47927237	0	0	0	11159206
2709	38075318167	0	0	0	7061727144	83529550595	0	0	0	15402954136
2710	20318110951	0	0	0	4894915099	21207197853	0	0	0	4528756193
2711	2552815617	0	0	0	443127058	10771081905	0	0	0	2119727971
2712	22311980	0	0	0	24806249	150676973	0	0	0	51933405
2713	862189027	0	0	0	90588212	61802364	0	0	0	6900015
2714	268267245	0	0	0	32829846	170144414	0	0	0	23608880
2715	64089215	0	0	0	11433229	223610355	0	0	0	26909149
2716	8570846528	8570846528	0	0	237814047	78458724	78458724	0	0	3707985
2801	6861568	0	0	0	18956706	14425827	0	0	0	17415897
2802	374149	0	0	0	745410	385759	0	0	0	533511
2803	52772028	0	0	0	46692369	78793472	0	0	0	60879271
2804	127567866	0	0	0	163340270	15022106	0	0	0	35293190
2805	7638000	0	0	0	16981992	574993	0	0	0	5328132
2806	4393816	0	0	0	2994518	26554989	0	0	0	27773320
2807	106180502	0	0	0	3980155	71668122	0	0	0	3391944
2808	8230799	0	0	0	2993575	2086985	0	0	0	753029
2809	320608078	0	0	0	70473153	21128055	0	0	0	11955003
2810	13342544	0	0	0	6114973	9728855	0	0	0	13312651
2811	146860286	0	0	0	67157966	89162464	0	0	0	128979647
2812	25535682	0	0	0	19920605	783722	0	0	0	8117117
2813	11364085	0	0	0	3236047	51014	0	0	0	1684781
2814	146834882	0	0	0	19151967	286713304	0	0	0	45955832
2815	529576758	0	0	0	84438012	552484780	0	0	0	87045141
2816	20297571	0	0	0	4148302	1243448	0	0	0	761549
2817	6957014	0	0	0	6904240	9914519	0	0	0	12444331
2818	363210229	0	0	0	108262561	61716484	0	0	0	45971876
2819	4421496	0	0	0	7048931	22204	0	0	0	40210
2820	5863788	0	0	0	3416138	1145541	0	0	0	708106
2821	51661114	0	0	0	35294130	18249231	0	0	0	23162676
2822	845764	0	0	0	13040841	1222522	0	0	0	19887126
2823	5725649	0	0	0	13683242	1906348	0	0	0	4679880
2824	6805030	0	0	0	5941614	3511752	0	0	0	3973983
2825	19682709	0	0	0	64201045	3324613	0	0	0	8325299
2826	15320391	0	0	0	51127686	4455739	0	0	0	11496142
2827	432344092	0	0	0	59775197	28585933	0	0	0	26115960
2828	13017340	0	0	0	13393525	65343267	0	0	0	22930977
2829	3283776	0	0	0	3717532	1001685	0	0	0	6183957
2830	6723862	0	0	0	4850984	828035	0	0	0	1464622
2831	1913648	0	0	0	2362386	38399	0	0	0	58653
2832	8087293	0	0	0	2814290	21977015	0	0	0	4211902
2833	132102591	0	0	0	30924244	49905854	0	0	0	11145966
2834	32756366	0	0	0	10363583	5423349	0	0	0	5498617
2835	190562189	0	0	0	86891289	85780262	0	0	0	56619026
2836	276234617	0	0	0	68677355	52786675	0	0	0	36883431
2837	144021402	0	0	0	4430707	954592	0	0	0	782639
2838	5213885	0	0	0	5164122	1188402	0	0	0	2974107
2839	41114916	0	0	0	21241889	17899540	0	0	0	14143250
2840	41189617	0	0	0	14058150	11052978	0	0	0	6179429
2841	4295702	0	0	0	10084858	1652641	0	0	0	4167712
2842	9847866	0	0	0	4933016	27033474	0	0	0	17120661
2843	351263662	0	0	0	38928296	983096	0	0	0	665482082
2844	1236058	0	0	0	344710089	5339425	0	0	0	133481831
2845	12633	0	0	0	3017425	31036	0	0	0	2177248
2846	2839609	0	0	0	18113185	760210	0	0	0	11314583
2847	24528818	0	0	0	8098923	7363807	0	0	0	2803942
2848	97875	0	0	0	2248049	58015	0	0	0	199746
2849	20715126	0	0	0	51444671	611655	0	0	0	3006950
2850	1441592	0	0	0	15697479	230398	0	0	0	7165766
2851	3451134	0	0	0	13104445	7052466	0	0	0	10564958
2901	141773507	0	0	0	62380127	1526253716	0	0	0	709501014
2902	754751161	0	0	0	353398799	1096602485	0	0	0	345203637
2903	0	0	0	0	265681468	316355964	0	0	0	238107144
2904	59475596	0	0	0	71585194	17364652	0	0	0	69096125
2905	278832269	0	0	0	227942271	109040030	0	0	0	85747100
2906	49999243	0	0	0	57043954	3028635	0	0	0	19466154
2907	133897602	0	0	0	119982350	21728723	0	0	0	142662804
2908	1440154	0	0	0	7951676	5440312	0	0	0	15242634
2909	117895426	0	0	0	192369710	45237743	0	0	0	94458128
2910	62782523	0	0	0	56304082	1267760	0	0	0	3486354
2911	839889	0	0	0	3297614	3099506	0	0	0	3044995
2912	25481119	0	0	0	53770412	12466251	0	0	0	45255967
2913	806470	0	0	0	6733110	106315	0	0	0	717911
2914	222594681	0	0	0	167503811	66888936	0	0	0	140033808
2915	195135478	0	0	0	204324469	208927752	0	0	0	221531273
2916	243567441	0	0	0	261339775	77375698	0	0	0	237773876
2917	261398258	0	0	0	186483395	46889737	0	0	0	65488365
2918	58432811	0	0	0	161597011	68564082	0	0	0	182337317
2919	8091590	0	0	0	17488172	23877804	0	0	0	48123103
2920	36504141	0	0	0	37805865	12857113	0	0	0	30083323
2921	190897613	0	0	0	287484636	321552667	0	0	0	303419293
2922	99639092	0	0	0	469423344	57029629	0	0	0	765515000
2923	14335735	0	0	0	29687789	14421392	0	0	0	25383396
2924	37969899	0	0	0	223023377	44654038	0	0	0	229171414
2925	3269296	0	0	0	22464512	33980035	0	0	0	114140635
2926	7722149	0	0	0	42562706	60273543	0	0	0	167961761
2927	2726873	0	0	0	9519802	400916	0	0	0	4806540
2928	1568466	0	0	0	9065512	1350266	0	0	0	18254212
2929	41776707	0	0	0	78838722	4934325	0	0	0	20083459
2930	107955565	0	0	0	265173979	7723204	0	0	0	713925542
2931	15627013	0	0	0	51442858	85452569	0	0	0	192738716
2932	0	0	0	0	1398810826	9496843	0	0	0	175189668
2933	71946109	0	0	0	1609582553	40828761	0	0	0	1043105483
2934	2287021	0	0	0	26697370	19131697	0	0	0	1032585865
2935	3723998	0	0	0	107194908	722413	0	0	0	71798865
2936	12488594	0	0	0	98019887	1795676	0	0	0	25089705
2937	1276372	0	0	0	84226600	254608	0	0	0	280936064
2938	2013333	0	0	0	4066383	39043	0	0	0	4982633
2939	0	0	0	0	113361888	261666	0	0	0	62289623
2940	6735396	0	0	0	14237946	456007	0	0	0	3802058
2941	6696779	0	0	0	214780517	6563245	0	0	0	338488457
2942	701237	0	0	0	14890404	1260551	0	0	0	37552845
3001	802565	0	0	0	43305862	244889	0	0	0	10878152
3002	14548776	0	0	0	662292246	4611858	0	0	0	492720421
3003	17818467	0	0	0	274196712	3565822	0	0	0	170707273
3004	105391500	0	0	0	7303716013	142943562	0	0	0	11430920514
3005	13286300	0	0	0	169347672	20449547	0	0	0	313866609
3006	4666414	0	0	0	201954877	4150989	0	0	0	456062642
3101	20682327	0	0	0	5808652	9476671	0	0	0	5302632
3102	2012173848	0	0	0	246983946	316198472	0	0	0	43388856
3103	267954893	0	0	0	36449512	114311	0	0	0	142354
3104	366426355	0	0	0	43703182	1962798	0	0	0	1316610
3105	739634060	0	0	0	124987527	287497868	0	0	0	59181686
3201	1250843	0	0	0	1478161	219909	0	0	0	780175
3202	6709747	0	0	0	6672618	33685588	0	0	0	34463985
3203	2548180	0	0	0	17908758	1037867	0	0	0	11641069
3204	76790048	0	0	0	386834434	80591417	0	0	0	462516849
3205	407468	0	0	0	3357170	211412	0	0	0	5889261
3206	160796349	0	0	0	213557167	207752301	0	0	0	362604765
3207	19489401	0	0	0	64833110	13176185	0	0	0	133840363
3208	58519936	0	0	0	226487259	122274195	0	0	0	362413143
3209	67323254	0	0	0	122414512	68990979	0	0	0	102116732
3210	6547882	0	0	0	19554669	9309451	0	0	0	26335062
3211	1084839	0	0	0	3168527	5093921	0	0	0	10768938
3212	11863774	0	0	0	65616712	8580419	0	0	0	91795566
3213	14790090	0	0	0	20802908	7936681	0	0	0	43379613
3214	237850765	0	0	0	123149381	38302462	0	0	0	100083057
3215	69295740	0	0	0	288645707	65938063	0	0	0	415487033
3301	17294305	0	0	0	132907989	28277390	0	0	0	97326577
3302	42719954	0	0	0	511371919	54523110	0	0	0	490170749
3303	36925516	0	0	0	456968120	22925295	0	0	0	299707719
3304	419269511	0	0	0	763280737	51229659	0	0	0	708974344
3305	101451481	0	0	0	296146345	88877504	0	0	0	408467703
3306	32748408	0	0	0	77693923	108087505	0	0	0	294047453
3307	102087411	0	0	0	340340076	215695831	0	0	0	757135024
3401	112163877	0	0	0	167385540	69547363	0	0	0	121204888
3402	729424287	0	0	0	613565278	635233132	0	0	0	713379318
3403	35296335	0	0	0	83228377	51276207	0	0	0	121895977
3404	28622104	0	0	0	54700681	12096380	0	0	0	27197030
3405	30571570	0	0	0	51328625	27540530	0	0	0	67785494
3406	36903129	0	0	0	80521123	12496991	0	0	0	41010694
3407	1736079	0	0	0	10056920	540027	0	0	0	4471465
3501	8634432	0	0	0	34585136	4543872	0	0	0	22243045
3502	6789268	0	0	0	33615265	3760398	0	0	0	17398266
3503	15603479	0	0	0	63120913	7976584	0	0	0	38511039
3504	5040820	0	0	0	23183950	14550683	0	0	0	35366362
3505	163287598	0	0	0	90818387	24794601	0	0	0	28861806
3506	96697365	0	0	0	162911376	61323932	0	0	0	176109872
3507	7379588	0	0	0	73586570	5561835	0	0	0	196192048
3604	11869262	0	0	0	29124403	54698	0	0	0	1452303
3605	2181975	0	0	0	9451005	634070	0	0	0	525454
3606	5411863	0	0	0	8077976	12638283	0	0	0	13191505
3701	61121212	0	0	0	296642745	37759635	0	0	0	353445149
3702	17822757	0	0	0	534093745	17137785	0	0	0	527980353
3703	25753569	0	0	0	129515939	79476936	0	0	0	360198097
3704	150594	0	0	0	2619400	419840	0	0	0	3046137
3705	490141	0	0	0	19110417	379093	0	0	0	28811862
3706	823705	0	0	0	8599232	773559	0	0	0	34132005
3707	36382120	0	0	0	276634687	26390377	0	0	0	190893676
3801	15930071	0	0	0	29359675	7970912	0	0	0	18668345
3802	120218881	0	0	0	33148237	24007264	0	0	0	37217118
3803	3736210	0	0	0	1538865	1282622	0	0	0	1034783
3804	47901223	0	0	0	8983631	2820032	0	0	0	1487661
3805	2620668	0	0	0	2725391	330572	0	0	0	754271
3806	11661730	0	0	0	12168195	10064292	0	0	0	15956622
3807	83998	0	0	0	142539	1634214	0	0	0	1794703
3808	93202699	0	0	0	463933603	231789057	0	0	0	991682758
3809	70701516	0	0	0	77093386	34645805	0	0	0	72861850
3810	6939952	0	0	0	14122841	9225304	0	0	0	41042615
3811	56513890	0	0	0	26047242	149321813	0	0	0	259820971
3812	42901701	0	0	0	74455882	39546684	0	0	0	63788294
3813	1475084	0	0	0	3046620	21647647	0	0	0	18782294
3814	8430343	0	0	0	15767044	39298134	0	0	0	52971555
3815	60671783	0	0	0	154717105	20744593	0	0	0	251049749
3816	98705769	0	0	0	27830109	96698318	0	0	0	75294800
3817	53410188	0	0	0	55358718	1710819	0	0	0	2405474
3818	308149	0	0	0	80456446	3462303	0	0	0	134151603
3819	5113696	0	0	0	7983072	21391302	0	0	0	29695732
3820	15866782	0	0	0	13983759	35326902	0	0	0	28729653
3821	1509427	0	0	0	24131275	3200826	0	0	0	45984613
3822	10358275	0	0	0	641128554	10450229	0	0	0	732463267
3823	228361071	0	0	0	144674433	88113746	0	0	0	64691357
3824	1122467459	0	0	0	781620401	559131374	0	0	0	820023050
3901	1306298827	0	0	0	944002100	28898946	0	0	0	48610070
3902	593595555	0	0	0	454913399	166361694	0	0	0	141039454
3903	300224000	0	0	0	315701825	279721117	0	0	0	259631799
3904	443084926	0	0	0	346369818	129708079	0	0	0	145592044
3905	52757239	0	0	0	75613839	52148654	0	0	0	80111479
3906	156229026	0	0	0	255594757	1211283	0	0	0	1045419
3907	458270208	0	0	0	773390677	321226675	0	0	0	489201458
3908	82044783	0	0	0	196105802	14391090	0	0	0	29870161
3909	76517601	0	0	0	137429189	109755057	0	0	0	185538655
3910	22759745	0	0	0	112798289	110274027	0	0	0	233516267
3911	42835335	0	0	0	100833774	22380676	0	0	0	125307533
3912	34915705	0	0	0	117472197	10960555	0	0	0	39059711
3913	2725098	0	0	0	28168126	4031843	0	0	0	25971634
3914	9123743	0	0	0	22810223	0	0	0	0	0
3915	17425709	0	0	0	8939044	86167280	0	0	0	36272513
3916	49664853	0	0	0	112027965	27766899	0	0	0	77081967
3917	104442338	0	0	0	212924589	91062129	0	0	0	441448825
3918	54694548	0	0	0	99892308	79608919	0	0	0	179016935
3919	523603363	0	0	0	326188917	39259432	0	0	0	256446207
3920	641241209	0	0	0	1107413255	290702239	0	0	0	807411735
3921	251038693	0	0	0	485577930	80076086	0	0	0	369898401
3922	11239440	0	0	0	61680408	13560245	0	0	0	76759158
3923	612611574	0	0	0	1211648443	599029344	0	0	0	682773994
3924	107190130	0	0	0	288927185	25813508	0	0	0	116724482
3925	170780485	0	0	0	141860247	46513273	0	0	0	191564373
3926	387358982	0	0	0	1285839150	120399457	0	0	0	704325984
4001	129079053	0	0	0	95302939	6179653	0	0	0	8344530
4002	143614580	0	0	0	213919962	203593951	0	0	0	251526701
4003	1325191	0	0	0	632431	94298	0	0	0	304569
4004	5084871	0	0	0	1555670	17090359	0	0	0	8071959
4005	51764242	0	0	0	77940268	57007322	0	0	0	100051675
4006	3608532	0	0	0	14159903	3884535	0	0	0	9224549
4007	1899096	0	0	0	5184040	406536	0	0	0	1675129
4008	23231407	0	0	0	84814134	41553375	0	0	0	117985481
4009	31300542	0	0	0	197386893	21307240	0	0	0	142085922
4010	24714921	0	0	0	106489360	12073662	0	0	0	125577961
4011	418798452	0	43348444	0	1231920066	223298394	0	18264173	0	790957373
4012	46259975	0	0	0	23463475	22979560	0	0	0	37253915
4013	5414358	0	11186676	0	13252794	1693292	0	481186	0	4151912
4014	3933224	0	0	0	41732857	1608386	0	0	0	25402245
4015	32722047	0	0	0	126637691	2912899	0	0	0	23422989
4016	73846321	0	0	0	343981212	43872292	0	0	0	334677811
4017	1866278	0	0	0	6645288	1380596	0	0	0	3373700
4101	33067912	0	0	0	61564168	67849741	0	0	0	105422930
4102	7194251	0	0	0	31050587	27662514	0	0	0	73602454
4103	335740	0	0	0	1791149	457885	0	0	0	935892
4104	15515818	0	0	0	203050660	31165930	0	0	0	235312659
4105	404598	0	0	0	14438815	1573563	0	0	0	46590711
4106	175661	0	0	0	3686516	70816	0	0	0	2776569
4107	144506	0	0	0	2860943	165015	0	0	0	2675990
4108	210492	0	0	0	4361099	247624	0	0	0	6914498
4109	632836	0	0	0	16802453	25756	0	0	0	307909
4110	2714910	0	0	0	511565	1596617	0	0	0	5213598
4111	1580008	0	0	0	3050264	783472	0	0	0	1139215
4201	3599944	0	0	0	31116311	1229306	0	0	0	38789185
4202	424375409	0	0	0	1038765704	17769895	0	0	0	227526652
4203	18776977	0	0	0	384561944	1812991	0	0	0	68057616
4204	843193	0	0	0	2138823	194408	0	0	0	3104809
4205	5304491	0	0	0	41908153	830893	0	0	0	27289579
4206	101731	0	0	0	665248	38689	0	0	0	1259221
4301	1277816	0	0	0	12714039	5307906	0	0	0	8975099
4302	668842	0	0	0	32251795	1255823	0	0	0	45079277
4303	140829	0	0	0	9386167	73562	0	0	0	4616597
4304	169843	0	0	0	2379540	117124	0	0	0	1591837
4401	219299786	0	0	0	12629292	122988356	0	0	0	6338988
4402	41588175	0	0	0	16350873	1226741	0	0	0	1484994
4403	270239458	0	0	0	86093867	36037944	0	0	0	14195172
4404	8282342	0	0	0	3146134	12196059	0	0	0	3078408
4405	865179	0	0	0	628991	633570	0	0	0	806682
4406	55902854	0	0	0	10291831	105514	0	0	0	185082
4407	4402634813	0	0	0	1529326806	120299032	0	0	0	48681228
4408	25548303	0	0	0	66594201	4644039	0	0	0	16298406
4409	111076223	0	0	0	146808497	32345908	0	0	0	31919170
4410	428000366	0	0	0	162480563	136417591	0	0	0	42110162
4411	542067935	0	0	0	266560106	60586639	0	0	0	21501139
4412	840223296	0	0	0	502534547	31425688	0	0	0	24763608
4413	21894522	0	0	0	10957982	5557488	0	0	0	3201287
4414	9798008	0	0	0	31251069	1899067	0	0	0	7621888
4415	340387725	0	15479218	0	136619526	337973185	0	13809146	0	101892138
4416	18175681	0	0	0	24557958	111693	0	0	0	249565
4417	6117154	0	0	0	11660578	267491	0	0	0	3432772
4418	237265830	0	0	0	428244798	30345082	0	0	0	91992917
4419	18075005	0	0	0	52412823	1382847	0	0	0	8610816
4420	17735788	0	0	0	62967746	1243126	0	0	0	7022826
4421	111959341	0	0	0	181950143	7718165	0	0	0	32938127
4501	127087	0	0	0	273136	17096	0	0	0	178328
4502	569098	0	0	0	1692304	165791	0	0	0	934597
4503	978368	0	0	0	10476032	25130	0	0	0	166705
4504	4902217	0	0	0	13196235	742628	0	0	0	5430003
4601	4753764	0	0	0	7932279	133066	0	0	0	832521
4602	19169827	0	0	0	53518216	610089	0	0	0	3434298
4701	109746828	0	0	0	54675517	52118	0	0	0	32886
4702	14643883	0	0	0	9335783	208683	0	0	0	40969
4703	1622153581	0	0	0	821930607	2335127	0	0	0	724639
4704	59018786	0	0	0	32812933	6402	0	0	0	244848
4705	22981558	0	0	0	11397189	168872	0	0	0	108701
4706	45973959	0	0	0	44016769	11061485	0	0	0	4247299
4707	50700509	0	0	0	17737786	685147019	0	0	0	107078190
4801	2288007389	0	0	0	1246675923	159600887	0	0	0	83653391
4802	1293362501	0	0	0	1020551767	180167717	0	0	0	318750832
4803	146829100	0	0	0	162443502	28869663	0	0	0	30591828
4804	898306636	0	0	0	484897875	50445919	0	0	0	45726913
4805	500452075	0	0	0	253947186	553125919	0	0	0	288149295
4806	55621744	0	0	0	76628168	15513072	0	0	0	26244953
4807	72782931	0	0	0	47748555	7125850	0	0	0	10347465
4808	12434324	0	0	0	17648111	44883051	0	0	0	53317963
4809	41430310	0	0	0	53682865	85736752	0	0	0	77056349
4810	2430132997	0	0	0	1885042156	301313390	0	0	0	296662511
4811	243576092	0	0	0	523224370	179337327	0	0	0	444969109
4812	648883	0	0	0	2226755	1355130	0	0	0	4409981
4813	8533526	0	0	0	46760665	12674826	0	0	0	49337908
4814	14281636	0	0	0	52437436	34777732	0	0	0	129478583
4815	51502	0	0	0	370914	509313	0	0	0	1689697
4816	26895147	0	0	0	38757279	43233742	0	0	0	44666634
4817	43539676	0	0	0	106846330	7131859	0	0	0	33992551
4818	449916946	0	0	0	630573277	182034837	0	0	0	456909005
4819	211273096	0	0	0	377575350	100311308	0	0	0	220497785
4820	68800738	0	0	0	186110357	18100055	0	0	0	91282554
4821	37976919	0	0	0	103564526	12140574	0	0	0	112107513
4822	3216119	0	0	0	5846837	7311729	0	0	0	16548527
4823	354186614	0	0	0	439740393	113222828	0	0	0	269726004
4901	195135402	0	0	0	1088461971	162837704	0	0	0	1690573042
4902	132086054	0	0	0	233218298	78221798	0	0	0	574778518
4903	9696655	0	0	0	25949752	4511060	0	0	0	28762715
4904	434512	0	0	0	12874374	1576659	0	0	0	18213361
4905	1854761	0	0	0	13745812	1450607	0	0	0	39761362
4906	336771	0	0	0	4328215	111318	0	0	0	11493733
4907	2917637	0	0	0	68680446	3780314	0	0	0	53020055
4908	4496458	0	0	0	28014121	3269822	0	0	0	34922533
4909	18105268	0	0	0	68928163	7405526	0	0	0	90586970
4910	3914937	0	0	0	20341578	1095332	0	0	0	7737167
4911	208098963	0	0	0	421843749	43326242	0	0	0	199796740
5001	46819	0	0	0	355936	32	0	0	0	8172
5002	50758	0	0	0	1150202	18631	0	0	0	195214
5003	287116	0	0	0	2373025	147804	0	0	0	1340110
5004	172871	0	0	0	7509763	107751	0	0	0	837917
5005	74473	0	0	0	1913393	10174	0	0	0	50983
5006	11006	0	0	0	823388	4985	0	0	0	125938
5007	1277487	0	0	0	56823679	1958063	0	0	0	35537181
5101	71564421	0	0	0	110105461	29989024	0	0	0	54907584
5102	3844835	0	0	0	106891834	1100215	0	0	0	38028688
5103	3991443	0	0	0	6399025	7261416	0	0	0	12842411
5104	16046	0	0	0	68721	86851	0	0	0	93930
5105	9651439	0	0	0	37771608	6924976	0	0	0	52665853
5106	5919842	0	0	0	30972716	6120212	0	0	0	47508252
5107	9377553	0	0	0	81456620	6005693	0	0	0	52478133
5108	432564	0	0	0	19842250	615020	0	0	0	32599008
5109	209643	0	0	0	1968508	1872982	0	0	0	10180769
5110	42395	0	0	0	201884	42234	0	0	0	211023
5111	4921076	0	0	0	69781030	4021888	0	0	0	93717687
5112	1795761	0	0	0	50094612	6211225	0	0	0	132670898
5113	38098	0	0	0	393724	40462	0	0	0	472620
5201	20540327	0	0	0	32713030	501647	0	0	0	726876
5202	28845574	0	0	0	13077284	1589374	0	0	0	1349718
5203	3409460	0	0	0	10979160	342234	0	0	0	858034
5204	468600	0	0	0	3628426	339337	0	0	0	4018487
5205	38003666	0	0	0	134739985	19125893	0	0	0	54463773
5206	5875763	0	0	0	14431498	795102	0	0	0	6296751
5207	1300671	0	0	0	8330062	714604	0	0	0	12079270
5208	41088974	0	0	0	225823177	1053636850	0	0	0	132693682
5209	45097561	0	0	0	234409535	5696292	0	0	0	75470402
5210	16124248	0	0	0	80212198	3133701	0	0	0	25547236
5211	10547627	0	0	0	102548673	2673875	0	0	0	30734396
5212	901180	0	0	0	13224397	305304	0	0	0	5801295
5301	4650960	0	0	0	16314201	815212	0	0	0	1893730
5302	50927	0	0	0	90334	2482	0	0	0	28694
5303	5339224	0	0	0	1482551	90704	0	0	0	220752
5304	619433	0	0	0	641577	111164	0	0	0	261879
5305	18791353	0	0	0	13380154	165971	0	0	0	350496
5306	2850067	0	0	0	24839833	2120327	0	0	0	25103523
5307	7236602	0	0	0	7148086	604403	0	0	0	945819
5308	701396	0	0	0	885637	264255	0	0	0	1203562
5309	3466372	0	0	0	51905368	3608797	0	0	0	73872101
5310	19882325	0	0	0	17322539	3279371	0	0	0	3918824
5311	227432	0	0	0	1956949	692699	0	0	0	3645509
5401	2227282	0	0	0	17275101	3329100	0	0	0	41169268
5402	517138544	0	0	0	589675740	74311888	0	0	0	207105643
5403	5757868	0	0	0	23227390	1346542	0	0	0	6601187
5404	6044905	0	0	0	51490647	8758813	0	0	0	35864236
5405	49001	0	0	0	329770	40540	0	0	0	279414
5406	1059030	0	0	0	4635158	314236	0	0	0	1720435
5407	227877292	0	0	0	513326531	50173990	0	0	0	291807299
5408	11821884	0	0	0	87937518	2069929	0	0	0	23874859
5501	6532036	0	0	0	9287050	310915	0	0	0	1237660
5502	5680222	0	0	0	17305635	2458085	0	0	0	5052088
5503	147684666	0	0	0	198009505	45236042	0	0	0	58413341
5504	8252282	0	0	0	11720531	4275796	0	0	0	6789850
5505	14283857	0	0	0	12400613	12265767	0	0	0	10932761
5506	7237939	0	0	0	16860563	7615726	0	0	0	16965317
5507	143234	0	0	0	707491	14188	0	0	0	29735
5508	1684710	0	0	0	9936674	1282808	0	0	0	8016172
5509	34080994	0	0	0	127528822	6026987	0	0	0	28809051
5510	5333219	0	0	0	15512086	193800	0	0	0	1026635
5511	1372506	0	0	0	5975765	867683	0	0	0	6414432
5512	2830602	0	0	0	32827041	2625687	0	0	0	28227664
5513	34383620	0	0	0	120299751	7012512	0	0	0	33331975
5514	16915295	0	0	0	70518541	6655812	0	0	0	48720585
5515	9056466	0	0	0	87707772	12040468	0	0	0	118855169
5516	142671536	0	0	0	172355797	3783932	0	0	0	50822230
5601	12905366	0	0	0	46693361	13334363	0	0	0	88901773
5602	16583252	0	0	0	32185199	13780814	0	0	0	50601847
5603	92475356	0	0	0	291354162	46932510	0	0	0	123520225
5604	1464220	0	0	0	13557016	835763	0	0	0	9785343
5605	453509	0	0	0	6831656	286213	0	0	0	7091574
5606	1223053	0	0	0	9675585	191158	0	0	0	2300747
5607	27580066	0	0	0	28849554	6975046	0	0	0	35817654
5608	4520687	0	0	0	19356539	1398537	0	0	0	12529759
5609	729725	0	0	0	3782238	262893	0	0	0	2496972
5701	5810724	2125750	0	0	66164311	1532334	597873	0	0	20573536
5702	250711346	30465107	0	0	202805890	9833602	4787877	0	0	116312742
5703	239560428	179407311	0	0	640255771	27642308	11004693	0	0	131076910
5704	21188162	19571706	0	0	33234974	3909397	1564514	0	0	9967579
5705	6645577	6797047	0	0	25658415	9562309	2777847	0	0	47963099
5801	51142381	0	0	0	154712046	2273574	0	0	0	42490108
5802	1138513	0	0	0	3599160	123472	0	0	0	843597
5803	288679	0	0	0	1375557	37496	0	0	0	2235708
5804	462430	0	0	0	7893725	371875	0	0	0	9989952
5805	58258	0	0	0	2388078	38417	0	0	0	1846904
5806	8363190	0	0	0	49553118	7080694	0	0	0	62326472
5807	621896	0	0	0	12976569	2347682	0	0	0	36723463
5808	1318872	0	0	0	27001011	699447	0	0	0	18026328
5809	298825	0	0	0	1113418	61616	0	0	0	666980
5810	2546191	0	0	0	75329803	1101327	0	0	0	21309499
5811	358842	0	0	0	1710415	483528	0	0	0	3197822
5901	857778	0	0	0	4041157	1034319	0	0	0	11513651
5902	4939776	0	0	0	19045483	1850469	0	0	0	12601458
5903	17121956	0	0	0	83497502	48090365	0	0	0	221066548
5904	3496865	1363114	0	0	7452596	7863015	7053573	0	0	17592989
5905	452650	0	0	0	2888559	617352	0	0	0	5705994
5906	9430322	0	0	0	31497262	7478366	0	0	0	36903896
5907	3248459	0	0	0	29259173	2503171	0	0	0	18605105
5908	344678	0	0	0	969635	85437	0	0	0	1027771
5909	540073	0	0	0	3322213	1143479	0	0	0	12471210
5910	1031265	0	0	0	8390315	522839	0	0	0	8699646
5911	4080856	0	0	0	71379235	6772989	0	0	0	140017170
6001	10377036	0	0	0	44320063	5258452	0	0	0	33942177
6002	48383329	0	0	0	205523035	14498682	0	0	0	174253995
6101	3078542	0	6845046	0	56342410	690293	0	1279415	0	28070232
6102	8676034	0	15262867	0	144500897	1419318	0	1527878	0	27889850
6103	394517471	0	36650654	0	168606588	1015395	0	2411195	0	27660949
6104	306275746	0	87082837	0	498317463	3743204	0	8988210	0	100295933
6105	37507794	0	85658748	0	374598543	3507160	0	12390844	0	73533349
6106	11531511	0	34109133	0	173193424	2404269	0	9744750	0	62692993
6107	2452511786	0	141483148	0	213781873	1073807	0	8509959	0	24904059
6108	981693412	0	321051598	0	468196879	1876624	0	15547910	0	56091866
6109	146931229	0	436777585	0	1509018913	11784283	0	747677523	0	252276901
6110	147974995	0	327611395	0	2210346721	14428594	0	187157459	0	508025924
6111	13856274	0	0	0	307741519	81779818	0	0	0	42152766
6112	12239410	0	30504838	0	143742707	874758	0	5683798	0	49130040
6113	663572	0	0	0	14699937	95446	0	0	0	3636711
6114	3722056	0	0	0	81076056	471337	0	0	0	13548539
6115	29775869	0	0	0	369392860	3564101	0	0	0	77501325
6116	8797398	0	0	0	82611630	1207735	0	0	0	15928709
6117	2210843	0	0	0	33364244	12968110	0	0	0	90460949
6201	17241179	0	23202647	0	384552712	2635673	0	3017196	0	112431001
6202	18816019	0	26940889	0	411028496	2243641	0	3067903	0	103843226
6203	124937599	0	160162661	0	1520922446	7467631	0	14572710	0	242422778
6204	163143435	0	471835071	0	2597754485	11279151	0	28440389	0	420633839
6205	42347394	0	128742401	0	752092512	4526571	0	15908228	0	121525497
6206	36444306	0	89338807	0	562707443	3496727	0	17190936	0	149047867
6207	5258954	0	0	0	77437951	611211	0	0	0	17094918
6208	9784126	0	0	0	170938028	781430	0	0	0	29433108
6209	6477645	0	0	0	148453901	772511	0	0	0	20822507
6210	18440978	0	0	0	358410422	4859462	0	0	0	121488880
6211	21092427	0	0	0	276051312	2544376	0	0	0	59499019
6212	29623653	0	0	0	414359181	2380673	0	0	0	119633596
6213	605185	0	0	0	7516680	45042	0	0	0	1775553
6214	4304511	0	25661179	0	92319222	1327598	0	8788518	0	92367236
6215	2603881	0	0	0	50423564	257660	0	0	0	26270508
6216	1804794	0	0	0	16141000	306056	0	0	0	4195392
6217	2153475	0	0	0	27570391	23104757	0	0	0	346381658
6301	6261914	0	0	0	37971675	1791943	0	0	0	25005101
6302	98349711	0	0	0	638056229	9114769	0	0	0	103748241
6303	20898204	0	0	0	155718126	1589337	0	0	0	23644957
6304	18513092	0	0	0	96260051	895671	0	0	0	12491440
6305	29392178	0	0	0	58313520	5556377	0	0	0	21513214
6306	16608854	0	0	0	73940622	1249183	0	0	0	14666737
6307	35974806	0	0	0	141555580	7816830	0	0	0	128872102
6308	169775	0	0	0	4193905	144309	0	0	0	1999705
6309	6384047	0	0	0	6867587	98636555	0	0	0	102139173
6310	22202585	0	0	0	12183168	9677749	0	0	0	6291303
6401	3638670	0	0	0	16787092	1497890	0	0	0	11184864
6402	55106345	0	0	0	524868858	2144334	0	0	0	40017248
6403	366557847	0	0	0	2199609501	25738348	0	0	0	533379392
6404	145345321	0	0	0	440945638	2695125	0	0	0	63630072
6405	14087474	0	0	0	113391622	1366017	0	0	0	26097549
6406	7640991	0	0	0	177528469	2494631	0	0	0	29223917
6501	41711	0	0	0	550310	10198	0	0	0	421729
6502	17568	0	0	0	452464	3287	0	0	0	153728
6503	92610	0	316309	0	1651052	119813	0	241187	0	1648207
6504	566798	0	0	0	8336779	91759	0	0	0	3459701
6505	72664995	0	0	0	133525194	2498162	0	0	0	32136946
6506	85956226	0	0	0	78971831	2045569	0	0	0	24185062
6507	330369	0	0	0	3504765	179312	0	0	0	3986919
6601	16112147	0	28268644	0	70027841	1231452	0	2232331	0	13386278
6602	163843	0	2575044	0	2356189	48644	0	653997	0	1216951
6603	1178165	0	0	0	2054113	7076333	0	0	0	13357306
6701	77903	0	0	0	2176891	98451	0	0	0	412346
6702	6663824	0	0	0	50074263	466443	0	0	0	5855269
6703	114618	0	0	0	4667331	56587	0	0	0	1376774
6704	1402968	0	0	0	21427793	219793	0	0	0	6312325
6801	41538409	0	0	0	9780654	4322928	0	0	0	1119524
6802	134564818	0	0	0	98902044	5069707	0	0	0	6091396
6803	123759153	0	0	0	55890341	13040135	0	0	0	12271118
6804	10554492	0	0	0	68938764	6805275	0	0	0	32295401
6805	14118100	0	0	0	92153585	19430064	0	0	0	127671537
6806	129494129	0	0	0	73950793	57220607	0	0	0	101021526
6807	42969035	0	0	0	29891290	35893412	0	0	0	25328532
6808	8874867	0	0	0	3270572	45380756	0	0	0	32257244
6809	59536910	0	0	0	17019594	106865457	0	0	0	28472463
6810	89661523	0	0	0	42521077	789611304	0	0	0	121747150
6811	48832790	0	0	0	21799146	45346782	0	0	0	19220490
6812	138431	0	0	0	1777627	864213	0	0	0	7488054
6813	6908232	0	0	0	44360662	5071430	0	0	0	49179958
6814	737836	0	0	0	6540751	258393	0	0	0	3442338
6815	17232680	0	0	0	114099055	57653734	0	0	0	152677479
6901	44406536	0	0	0	9092205	21120649	0	0	0	4709050
6902	153964696	0	0	0	31138390	120974057	0	0	0	85136326
6903	7498175	0	0	0	26037349	42355166	0	0	0	142314092
6904	203090045	0	0	0	20187559	54106446	0	0	0	8047672
6905	21407975	0	0	0	6247047	8181336	0	0	0	3779584
6906	1781799	0	0	0	6978671	42101122	0	0	0	18894003
6907	52642397	4694196	0	0	32904511	7561662	945826	0	0	4679020
6908	550512390	61472843	0	0	311809816	14470405	1645562	0	0	19015589
6909	3418142	0	0	0	14573992	1074874	0	0	0	21085335
6910	57240015	0	0	0	99125850	14119880	0	0	0	38987377
6911	32076018	0	0	0	93747677	11121241	0	0	0	167526650
6912	68888434	0	0	0	128423215	30171340	0	0	0	179697465
6913	154469192	0	0	0	123443052	4284498	0	0	0	46374056
6914	34706925	0	0	0	44629410	2121336	0	0	0	21386196
7001	17599331	0	0	0	1387779	31385227	0	0	0	13393854
7002	14880972	0	0	0	26838029	2142562	0	0	0	15904892
7003	8226889	0	0	0	5794331	6357978	0	0	0	4857672
7004	16196542	2905054	0	0	7319922	10115746	2441697	0	0	10206659
7005	221049779	27969407	0	0	84307499	155793059	14023756	0	0	67696335
7006	6506484	0	0	0	16181938	661292	0	0	0	7770099
7007	108451535	0	0	0	258110482	29899127	0	0	0	121243256
7008	6151703	0	0	0	20649727	3579207	0	0	0	9182796
7009	28518446	0	0	0	95906230	6568547	0	0	0	39312894
7010	178559336	0	0	0	159935944	126467669	0	0	0	91073094
7011	72817896	0	0	0	146961854	76995306	0	0	0	103451715
7012	1085476	0	0	0	3429044	102775	0	0	0	562477
7013	97301720	0	0	0	257900882	16822647	0	0	0	62884284
7014	641547	0	0	0	5949044	174422	0	0	0	3083360
7015	4526734	0	0	0	6899365	0	0	0	0	0
7016	18676780	0	0	0	26258074	943647	0	0	0	4242353
7017	2662894	0	0	0	29348403	10027688	0	0	0	66480065
7018	8242233	0	0	0	23609279	11407289	0	0	0	10754075
7019	79476325	0	0	0	208968961	114772924	0	0	0	318251499
7020	5534951	0	0	0	40600947	11343614	0	0	0	42323351
7101	4400	0	0	0	51775672	14719	0	0	0	34278947
7102	122891	0	0	0	534911440	10542	0	0	0	2477937992
7103	734302	0	0	0	108089800	18724	0	0	0	69285954
7104	13907	0	0	0	10089887	40942	0	0	0	1984776
7105	18957	0	0	0	21132026	19750	0	0	0	19503594
7106	4379972	0	0	0	662849231	1826691	0	0	0	262489488
7107	68298	0	0	0	2706600	51064	0	0	0	753248
7108	860977	0	0	0	3837212940	309713	0	0	0	2700877708
7109	25885	0	0	0	844365	47202	0	0	0	2081117
7110	55232	0	0	0	772859157	64253	0	0	0	1282357735
7111	4781	0	0	0	5891470	680	0	0	0	204839
7112	5366380	0	0	0	1052007430	8888537	0	0	0	77170027
7113	958387	0	0	0	2008001904	222952	0	0	0	1248176722
7114	294217	0	0	0	30243354	82644	0	0	0	54019980
7115	142119	0	0	0	30689757	26942	0	0	0	93881195
7116	148704	0	0	0	10615380	29131	0	0	0	6640396
7117	4995883	0	0	0	153875010	1168636	0	0	0	67499429
7118	22047	0	0	0	2800049	2553221	0	0	0	21292195
7201	156232058	0	0	0	22368449	6717204	0	0	0	4928937
7202	394245595	0	0	0	220788122	37219706	0	0	0	100988416
7203	3093861	0	0	0	2026299	1112418	0	0	0	1327417
7204	146443333	0	0	0	68219647	4946912571	0	0	0	544250942
7205	34113604	0	0	0	25905383	68112805	0	0	0	38672457
7206	1613749	0	0	0	2018791	3448814	0	0	0	1497523
7207	324534660	0	0	0	106795811	595798253	0	0	0	156087427
7208	1396703801	0	0	0	459146750	675450801	0	0	0	211944190
7209	718457764	0	0	0	252561462	163952312	0	0	0	57203338
7210	1503509414	0	0	0	775858550	857316966	0	0	0	488042535
7211	128556023	0	0	0	64794639	155795335	0	0	0	87786137
7212	235318742	0	0	0	127855241	87491800	0	0	0	96896312
7213	307202302	0	0	0	82817664	793359659	0	0	0	230498034
7214	461804049	0	0	0	117461005	545575886	0	0	0	161140308
7215	95139480	0	0	0	46091377	139494682	0	0	0	80619024
7216	658537022	0	0	0	230095929	947022520	0	0	0	309248521
7217	94438914	0	0	0	67986558	183145992	0	0	0	111628907
7218	41972911	0	0	0	54115672	115674109	0	0	0	129030532
7219	394324105	0	0	0	219470658	171055835	0	0	0	255728654
7220	36496551	0	0	0	65437870	42033387	0	0	0	98285357
7221	6146902	0	0	0	9466276	26039455	0	0	0	44189739
7222	51472808	0	0	0	110272027	21098442	0	0	0	60838469
7223	14616433	0	0	0	40267243	5912704	0	0	0	18367405
7224	21354045	0	0	0	12966700	35736838	0	0	0	31525148
7225	320553028	0	0	0	147537067	97871057	0	0	0	71021094
7226	51763382	0	0	0	31294448	53671441	0	0	0	54345420
7227	58941245	0	0	0	32451237	11780618	0	0	0	6118882
7228	182136338	0	0	0	139913703	192569327	0	0	0	151233092
7229	11731857	0	0	0	17540006	12726215	0	0	0	23509052
7301	33322391	0	0	0	22069303	83118265	0	0	0	47007166
7302	109408159	0	0	0	74732040	39828122	0	0	0	45345317
7303	15194971	0	0	0	15788607	63893627	0	0	0	48000495
7304	501994230	0	0	0	515028197	175813130	0	0	0	334085750
7305	179294350	0	0	0	117059235	160064438	0	0	0	119874847
7306	375598209	0	0	0	275477288	366938267	0	0	0	233495400
7307	68537914	0	0	0	234394910	40757214	0	0	0	260716382
7308	230523175	0	0	0	261825104	277170682	0	0	0	514428260
7309	8632013	0	0	0	32560269	17608250	0	0	0	57705593
7310	38495278	0	0	0	88777073	47975545	0	0	0	117426262
7311	14286470	0	0	0	45139537	14931835	0	0	0	47453114
7312	53003010	0	0	0	85255032	48665542	0	0	0	136379318
7313	4048661	0	0	0	3684268	5565400	0	0	0	8259056
7314	44151968	0	0	0	53524453	58852404	0	0	0	65944488
7315	23754428	0	0	0	83991471	16466599	0	0	0	75683880
7316	1553547	0	0	0	5064940	1881356	0	0	0	11297590
7317	39579848	0	0	0	47920184	18750661	0	0	0	27808992
7318	1746275435	0	0	0	584637090	39180381	0	0	0	311457315
7319	750871	0	0	0	6708966	722414	0	0	0	10114958
7320	22879297	0	0	0	69516166	26816841	0	0	0	85540973
7321	55562256	0	0	0	190706602	6458457	0	0	0	39803135
7322	87875533	0	0	0	161519726	15305062	0	0	0	38655870
7323	63619315	0	0	0	276018353	6908342	0	0	0	36149455
7324	18929338	0	0	0	86324061	3127436	0	0	0	31103177
7325	136380781	0	0	0	99983806	99892616	0	0	0	153045393
7326	161149728	0	0	0	521572226	115938072	0	0	0	434273269
7401	89437	0	0	0	409676	10930310	0	0	0	6713601
7402	367656	0	0	0	2261999	69275	0	0	0	499908
7403	321495460	0	0	0	550365123	30598261	0	0	0	55167803
7404	20612644	0	0	0	24672738	159755906	0	0	0	175953125
7405	1038179	0	0	0	2230609	4208435	0	0	0	9203482
7406	2200654	0	0	0	6979048	0	0	0	0	0
7407	29738231	0	0	0	77545221	22138471	0	0	0	55853379
7408	82458752	0	0	0	156118154	75617198	0	0	0	150221275
7409	60191220	0	0	0	161504812	20129674	0	0	0	77790642
7410	11532323	0	0	0	54081615	4108919	0	0	0	34822511
7411	52493296	0	0	0	156483939	25912538	0	0	0	71882872
7412	9365746	0	0	0	60726348	11083478	0	0	0	82846381
7413	4164146	0	0	0	20003089	6791895	0	0	0	23425130
7414	1145979	0	0	0	2604925	211685	0	0	0	5043289
7415	4318749	0	0	0	15781526	1555168	0	0	0	16514728
7416	56999	0	0	0	872615	72060	0	0	0	531396
7417	156097	0	0	0	1120042	361291	0	0	0	4007416
7418	4269340	0	0	0	40100967	1174014	0	0	0	16917698
7419	6040194	0	0	0	43558108	11258254	0	0	0	89106146
7501	67185441	0	0	0	248201563	135821	0	0	0	1166416
7502	51848077	0	0	0	218874794	27596210	0	0	0	242125951
7503	14694950	0	0	0	27721339	7863476	0	0	0	26089237
7504	1305843	0	0	0	16471260	7828620	0	0	0	83020567
7505	6949630	0	0	0	104978666	8099226	0	0	0	101094424
7506	6496116	0	0	0	75419288	2356108	0	0	0	41527360
7507	1426067	0	0	0	13824211	1990208	0	0	0	32803170
7508	1453418	0	0	0	24206125	794123	0	0	0	10601256
7601	445093888	0	0	0	699934148	267773452	0	0	0	429072995
7602	111514206	0	0	0	106720194	210160281	0	0	0	212063184
7603	5520207	0	0	0	16309717	9408193	0	0	0	25675932
7604	83938242	0	0	0	198125394	83156644	0	0	0	143415692
7605	14035599	0	0	0	29772783	10361792	0	0	0	35338727
7606	343580420	0	0	0	851967140	213841892	0	0	0	512120118
7607	61832343	0	0	0	250040050	41878031	0	0	0	157936925
7608	14042695	0	0	0	49387409	7458669	0	0	0	37509452
7609	1229016	0	0	0	12960589	619741	0	0	0	11000386
7610	43147565	0	0	0	218505101	27967460	0	0	0	100564292
7611	1956243	0	0	0	17579399	1144928	0	0	0	7634298
7612	39003965	0	0	0	95288072	48808996	0	0	0	124733949
7613	1159259	0	0	0	13677744	8896404	0	0	0	58152547
7614	1418347	0	0	0	3114009	698542	0	0	0	1866376
7615	12542255	0	0	0	92922908	2292516	0	0	0	20308404
7616	77363109	0	0	0	207960681	23214283	0	0	0	216004918
7801	222204458	0	0	0	155646512	135846045	0	0	0	76758012
7802	13516699	0	0	0	5196560	10787786	0	0	0	5419542
7803	725658	0	0	0	1319049	137479	0	0	0	549706
7804	13686534	0	0	0	12494670	499801	0	0	0	545395
7805	5281	0	0	0	302240	23357	0	0	0	144448
7806	1118594	0	0	0	5073397	1846183	0	0	0	5037049
7901	121979859	0	0	0	122548449	37697533	0	0	0	41940831
7902	2750150	0	0	0	2015406	19227105	0	0	0	16450978
7903	651415	0	0	0	1108472	3040706	0	0	0	4472723
7904	1706091	0	0	0	1668028	1170848	0	0	0	2131380
7905	2870181	0	0	0	6151451	83089	0	0	0	291716
7906	10730	0	0	0	48847	113029	0	0	0	3720768
7907	3183570	0	0	0	11909994	7057524	0	0	0	23229847
8001	9676489	0	0	0	44271716	2980868	0	0	0	12512482
8002	169225	0	0	0	309482	2307881	0	0	0	2933275
8003	527599	0	0	0	2662805	205062	0	0	0	1221619
8004	212265	0	0	0	1118507	327075	0	0	0	283115
8005	648342	0	0	0	4757091	136090	0	0	0	739498
8006	80746	0	0	0	280055	12363	0	0	0	179490
8007	956668	0	0	0	6767098	984777	0	0	0	5603405
8101	2791182	0	0	0	29563462	1970625	0	0	0	13235329
8102	1232801	0	0	0	22351127	1126458	0	0	0	6871302
8103	1474537	0	0	0	195998066	393447	0	0	0	112972056
8104	23759869	0	0	0	41012255	17211747	0	0	0	42070094
8105	4702376	0	0	0	77192320	1869034	0	0	0	44608861
8106	1525313	0	0	0	11151523	1302881	0	0	0	8436505
8107	911202	0	0	0	1781115	86827	0	0	0	712227
8108	37016971	0	0	0	278262078	13428114	0	0	0	170627610
8109	763839	0	0	0	7864265	291004	0	0	0	2973016
8110	344048	0	0	0	599778	524717	0	0	0	866955
8111	13819053	0	0	0	16723600	1000	0	0	0	1639
8112	3919203	0	0	0	38235335	6045892	0	0	0	34550588
8113	99445	0	0	0	1821109	1268474	0	0	0	2940054
8201	16034987	0	0	0	49704030	5430460	0	0	0	22029811
8202	14413814	0	0	0	119575354	5115407	0	0	0	72879901
8203	4673714	0	0	0	49813800	2930460	0	0	0	25035352
8204	10306607	0	0	0	73380009	3797819	0	0	0	27488640
8205	48498421	0	0	0	218741677	20949576	0	0	0	142800961
8206	4919191	0	0	0	24152736	1171021	0	0	0	8533258
8207	33814359	0	0	0	563779043	30666689	0	0	0	511699447
8208	4768720	0	0	0	40513019	2588036	0	0	0	46934188
8209	827345	0	0	0	115654268	1272450	0	0	0	70257049
8210	1988764	0	0	0	11280785	382027	0	0	0	6126817
8211	8922492	0	0	0	56321529	8217444	0	0	0	21954943
8212	332218525	0	0	0	382693211	230791603	0	0	0	808398596
8213	2341015	0	0	0	17522849	234920	0	0	0	1877012
8214	2900987	0	0	0	24294016	520503	0	0	0	12045090
8215	16682020	0	0	0	100326162	2847100	0	0	0	27994872
8301	19552117	0	0	0	232945533	4863025	0	0	0	90559726
8302	144925875	0	0	0	636497278	44282471	0	0	0	296687389
8303	16155005	0	0	0	40169027	3939893	0	0	0	15200323
8304	2904881	0	0	0	13676992	2255784	0	0	0	13538579
8305	10739496	0	0	0	23946945	2653769	0	0	0	9922559
8306	15437923	0	0	0	83414890	1579820	0	0	0	19907263
8307	7806987	0	0	0	55064267	4132530	0	0	0	47373926
8308	10925121	0	0	0	47683770	8210699	0	0	0	95841632
8309	42750480	0	0	0	150805578	28922405	0	0	0	130313272
8310	917988	0	0	0	17232110	506661	0	0	0	9113964
8311	18827634	0	0	0	40878675	19801445	0	0	0	53692465
8401	1414478	0	0	0	22674375	585826	0	0	0	9167092
8402	2643545	0	0	0	18077143	13944733	0	0	0	78981142
8403	43427706	0	0	0	347322676	5383511	0	0	0	41784881
8404	3033217	0	0	0	14159003	7688920	0	0	0	67816360
8405	3403935	0	0	0	28991240	6544993	0	0	0	73610566
8406	4426376	0	0	0	94929310	9156949	0	0	0	206783568
8407	439974088	0	861295	0	692339673	144032558	0	10969918	0	1772208424
8408	92029007	0	603034267	0	973082278	111693591	0	13791712	0	1154347126
8409	1212616577	0	0	0	1433688274	108114273	0	0	0	1095357413
8410	491051	0	0	0	6132007	478183	0	0	0	15664313
8411	17229083	0	0	0	6160536538	21630405	0	0	0	11613827111
8412	26422626	0	0	0	252417855	20037384	0	0	0	266013191
8413	64118514	0	0	0	1115024444	45823784	0	0	0	961492024
8414	94680743	0	0	0	1099063960	65054321	0	0	0	1189912716
8415	57532802	0	0	0	614875320	26165662	0	0	0	383923053
8416	3852938	0	0	0	47473563	5095398	0	0	0	66966333
8417	7027789	0	0	0	49400729	7084118	0	0	0	81003586
8418	243767712	0	0	0	1015135028	51015165	0	0	0	255246653
8419	34697436	0	0	0	526784573	34654539	0	0	0	555152973
8420	2040532	0	0	0	15128051	5708096	0	0	0	23528593
8421	117292281	0	0	0	960832088	72512708	0	0	0	1154886685
8422	84097610	0	0	0	679971178	11835290	0	0	0	228775861
8423	8891778	0	0	0	122141040	3565623	0	0	0	115536524
8424	59818497	0	0	0	344477098	24083142	0	0	0	274015138
8425	23565797	0	2074642	0	111867737	6968551	0	460350	0	78697495
8426	28121693	0	0	0	145743190	12140253	0	0	0	71864313
8427	69531216	0	52525	0	387116243	365866190	0	70179	0	859006439
8428	52090135	0	0	0	410107958	31040822	0	0	0	345628003
8429	165622104	0	60044	0	777086269	285089343	0	62191	0	1286103637
8430	10629180	0	0	0	107481330	9250372	0	0	0	111045426
8431	324306503	0	0	0	1253636092	175545126	0	0	0	1272233807
8432	24775139	0	0	0	143816203	14661832	0	0	0	72174021
8433	152459985	0	0	0	345144005	28150238	0	0	0	192459471
8434	2932170	0	0	0	39956037	3146445	0	0	0	31276553
8435	286454	0	0	0	5938541	468660	0	0	0	6815993
8436	12124255	0	0	0	74643227	4703789	0	0	0	32353168
8437	1107192	0	0	0	16214695	1494696	0	0	0	30842229
8438	15564640	0	0	0	250195017	13021590	0	0	0	161119624
8439	9331615	0	0	0	77924508	7260508	0	0	0	75352753
8440	6714059	0	0	0	100334052	3991939	0	0	0	64621234
8441	10387861	0	0	0	156946555	7837991	0	0	0	156273440
8442	3729835	0	0	0	91114488	7659692	0	0	0	153776599
8443	27935194	0	0	0	660692248	28873775	0	0	0	637130786
8444	352340	0	12317	0	4564073	2975362	0	4050	0	12377158
8445	1608925	0	33441	0	14546321	4896252	0	115341	0	21643592
8446	400677	0	1699	0	6427431	2346935	0	2022	0	5109936
8447	1422341	0	29457	0	36108000	6597567	0	44185	0	55175692
8448	3987789	0	0	0	80361198	14856443	0	0	0	132709816
8449	210066	0	0	0	5364291	634532	0	0	0	4515962
8450	151325972	0	0	0	471454597	12531373	0	0	0	45979715
8451	13020706	0	0	0	98269952	25578235	0	0	0	131979650
8452	4451000	0	0	0	69524815	3537764	0	0	0	53600961
8453	600973	0	0	0	7377942	939402	0	0	0	12732120
8454	8418284	0	0	0	61227526	9868032	0	0	0	51573409
8455	7098377	0	0	0	24352922	35037164	0	0	0	113941022
8456	2598918	0	1383	0	111076033	1153954	0	947	0	97534886
8457	11084258	0	2391	0	163872966	17373009	0	2137	0	246940413
8458	13390189	0	15190	0	190075028	11238113	0	4054	0	104446353
8459	7668236	0	154610	0	85330880	7119262	0	24290	0	56079195
8460	4870600	0	145643	0	91608734	4161130	0	9095	0	86489597
8461	3642289	0	108633	0	42767603	2302407	0	3566	0	26119747
8462	17727656	0	38122	0	156698214	12954737	0	25309	0	106183054
8463	1667835	0	17239	0	23869336	1451745	0	2200	0	21304734
8464	3509066	0	0	0	49715777	897820	0	0	0	17951283
8465	17462699	0	1008713	0	175877621	4331909	0	43912	0	44924168
8466	45098837	0	0	0	465768698	17157996	0	0	0	494525019
8467	7232167	0	0	0	174791738	2251868	0	0	0	115938188
8468	919562	0	0	0	23606647	770551	0	0	0	17241339
8469	75560	0	25058	0	2434615	301670	0	35740	0	6774290
8470	37425678	0	23282340	0	167790748	1545419	0	2674011	0	84768955
8471	508831646	0	938871486	0	15858981232	266729079	0	762957175	0	12327513423
8472	10187755	0	499241	0	174992393	24978495	0	72873	0	600927426
8473	291633214	0	0	0	9842357552	64176264	0	0	0	5768911808
8474	32782178	0	0	0	202262144	80904383	0	0	0	484774732
8475	2052698	0	0	0	55406277	5019341	0	0	0	84209595
8476	11377660	0	0	0	133843101	4074759	0	0	0	197213648
8477	25182401	0	0	0	330700577	16311280	0	0	0	208178964
8478	1578798	0	0	0	62183376	4633428	0	0	0	158145390
8479	67368205	0	0	0	1073029692	57192262	0	0	0	1179121333
8480	7997464	0	0	0	167134402	5537910	0	0	0	101833109
8481	129528932	0	0	0	1306095428	50991217	0	0	0	1112943062
8482	87457973	0	0	0	523057803	32641369	0	0	0	458496510
8483	547808707	0	0	0	673903561	78370866	0	0	0	602759271
8484	17783477	0	0	0	120272719	4768855	0	0	0	171344598
8485	15009118	0	0	0	204252222	11312889	0	0	0	351301317
8501	75333734	0	72204203	0	733053693	53088199	0	15969665	0	498166415
8502	17853038	0	1329533	0	180792045	90543605	0	158227	0	763454010
8503	19232903	0	0	0	138617928	39956906	0	0	0	236645181
8504	107083374	0	0	0	1520306021	34464559	0	0	0	1079037337
8505	14272426	0	0	0	87826641	8097545	0	0	0	293894024
8506	273170669	0	0	0	251018211	15575944	0	0	0	153536151
8507	130190630	0	0	0	516644175	124861589	0	0	0	331730794
8508	106070479	0	0	0	466175562	29082470	0	0	0	338235951
8509	57420158	0	0	0	383333894	17558229	0	0	0	153893928
8510	6065055	0	0	0	113339825	1083172	0	0	0	22092312
8511	61555231	0	0	0	398331571	34555203	0	0	0	398181476
8512	41654618	0	0	0	248444147	19312162	0	0	0	167476058
8513	5993883	0	0	0	52652632	1213927	0	0	0	20062734
8514	3561361	0	0	0	99410624	7219955	0	0	0	120375764
8515	12013729	0	0	0	289916500	18020513	0	0	0	166912806
8516	240012516	0	0	0	1256204649	81243725	0	0	0	535963569
8517	50205501	0	0	0	6089522336	33926326	0	0	0	6249644321
8518	68557420	0	0	0	641228361	27938451	0	0	0	529369907
8519	12892114	0	9198820	0	388413848	1520819	0	1652561	0	74227317
8520	8968685	0	13420590	0	265929710	706742	0	613753	0	49606584
8521	38445167	0	7688816	0	804731780	9527127	0	2254556	0	223006909
8522	10298028	0	0	0	214801137	4077484	0	0	0	90881314
8523	65786161	0	0	0	602537388	23931695	0	0	0	315388853
8524	91522047	0	0	0	1764969762	48362569	0	0	0	1443346950
8525	25845170	0	219002096	0	4946019348	28323945	0	48630465	0	8579162401
8526	983430	0	0	0	270507557	398348	0	0	0	180696558
8527	85566646	0	28470197	0	1360347727	4482292	0	1957989	0	137418300
8528	130909070	0	11470740	0	1892344046	148822887	0	31977449	0	1175564526
8529	32632762	0	0	0	1392414931	23987497	0	0	0	1229258308
8530	5668249	0	0	0	33401764	1565220	0	0	0	60955465
8531	67559905	0	0	0	673620605	11714463	0	0	0	567220374
8532	12385018	0	0	0	650052451	8059163	0	0	0	616195608
8533	4672829	0	0	0	196083616	6734074	0	0	0	245080532
8534	9970372	0	0	0	794034978	4301717	0	0	0	673837671
8535	10247189	0	0	0	113567951	7312346	0	0	0	140389031
8536	137011602	0	0	0	1812205918	149833764	0	0	0	1504462106
8537	9921735	0	0	0	375573702	4881351	0	0	0	278439539
8538	19835104	0	0	0	324560021	10204920	0	0	0	484963791
8539	39822740	0	0	0	377616110	12670137	0	0	0	246181144
8540	88981783	0	0	0	872362051	143389448	0	0	0	799614279
8541	10621731	0	0	0	1061858226	7246634	0	0	0	899669137
8542	12330331	0	0	0	8027864499	8908604	0	0	0	8004445755
8543	11993026	0	0	0	1090504563	10483621	0	0	0	1539711883
8544	269008954	0	0	0	1658051929	192880402	0	0	0	993622548
8545	12651728	0	0	0	35789433	2433416	0	0	0	31284703
8546	7490769	0	0	0	54364958	5569538	0	0	0	110742925
8547	8957051	0	0	0	37369420	4335990	0	0	0	44635563
8548	16438209	0	0	0	195588222	3068370	0	0	0	159958881
8601	780187	0	436	0	3984428	579721	0	149	0	30886773
8602	4288516	0	1125	0	82880108	58949	0	246	0	455953
8603	150493	0	22	0	4471586	419470	0	292	0	701800
8604	368404	0	6883	0	6894849	23269	0	219	0	417274
8605	4567427	0	18283	0	123720053	5635178	0	163	0	29560117
8606	7256520	0	173125	0	24395997	74615	0	4820	0	502869
8607	57171261	0	0	0	247642906	19214866	0	0	0	180981078
8608	2860152	0	0	0	30806030	3933481	0	0	0	23643990
8609	2482033	0	4157	0	6515235	6222270	0	16168	0	18170879
8701	87442056	0	22243	0	583755531	199802850	0	53880	0	1100852427
8702	12052973	0	2275	0	135374991	21908899	0	11549	0	188718099
8703	3016834435	0	2447137	0	29002235018	1261180174	0	923988	0	11984765356
8704	413347888	0	200323	0	3044643179	205626347	0	81584	0	1224261043
8705	11080605	0	2000000585	0	101846753	6542519	0	371	0	48032934
8706	84178492	0	23390	0	595116746	6058782	0	10699	0	41255203
8707	20834774	0	370011	0	182578650	13262067	0	53789587	0	131977436
8708	1661066851	0	0	0	8819558048	1039789637	0	0	0	5966045442
8709	1879282	0	0	0	14281009	1633069	0	0	0	15074276
8711	37460833	0	244963	0	778128475	7355032	0	67740	0	156507218
8712	35743192	0	2619284	0	189478685	2855610	0	187832	0	21373049
8713	4286135	0	293316	0	52212384	1425730	0	113408	0	30163434
8714	37363165	0	0	0	319334537	4950359	0	0	0	77549337
8715	14055942	0	0	0	80867549	1338945	0	0	0	8343584
8716	136194571	0	0	0	419760218	111791327	0	0	0	378115753
8802	5800	0	1	0	889980	1500	0	1	0	7199405
8804	40147	0	0	0	4974787	39330	0	0	0	11618969
8901	43781003	0	0	0	99120472	320692	0	0	0	6498752
8902	192900	0	4	0	3302157	3200	0	2	0	31934
8903	10650942	0	70287	0	166250822	16829986	0	19841	0	526091132
8904	432835	0	0	0	1681250	320	0	0	0	4932
8905	101050	0	11	0	1698666	603301	0	96	0	6429421
8906	606929	0	196	0	18188206	4776686	0	322	0	53561232
8907	3562195	0	0	0	18788264	3735352	0	0	0	46036793
8908	0	0	0	0	0	120	0	0	0	2090
9001	6925911	0	0	0	620477881	2913286	0	0	0	571661861
9002	797972	0	0	0	138823343	472874	0	0	0	68747946
9003	3749548	0	0	0	110127367	147608	0	0	0	20210186
9004	8283209	0	40611355	0	123422453	700032	0	110980323	0	36887755
9005	2370004	0	0	0	52244808	333270	0	0	0	27049277
9006	14544074	0	0	0	410625119	3535180	0	0	0	119774164
9007	333523	0	0	0	43802270	215960	0	0	0	24675141
9008	944088	0	0	0	37322458	551512	0	0	0	34979171
9009	64674345	0	0	0	1085899457	58230188	0	0	0	634814633
9010	2781557	0	0	0	181945560	1342434	0	0	0	67439633
9011	568256	0	0	0	45963036	234546	0	0	0	39120250
9012	168786	0	0	0	23007141	331598	0	0	0	55511288
9013	1162653	0	0	0	471928348	579525	0	0	0	213587030
9014	1475188	0	0	0	1120885841	1686086	0	0	0	1247008433
9015	187114253	0	0	0	606316568	8388385	0	0	0	524629374
9016	112908	0	0	0	10240130	127678	0	0	0	7098881
9017	4180642	0	0	0	49710421	3080733	0	0	0	48653683
9018	58021364	0	0	0	1741298127	31242588	0	0	0	1278800106
9019	10576074	0	0	0	139619808	3854234	0	0	0	375687638
9020	637204	0	0	0	49951514	6334345	0	0	0	93914691
9021	25565801	0	0	0	611232030	88821764	0	0	0	616519418
9022	3127912	0	0	0	276978146	3443619	0	0	0	255965413
9023	4039795	0	0	0	129547258	3325056	0	0	0	109687381
9024	1122639	0	0	0	55418353	3560801	0	0	0	191719798
9025	1946931	0	0	0	53586152	2112142	0	0	0	59013755
9026	44218736	0	0	0	348675855	60129241	0	0	0	434826875
9027	8242682	0	0	0	867641942	8347131	0	0	0	1153741774
9028	8341180	0	0	0	65437238	3008978	0	0	0	84671544
9029	2973411	0	0	0	101350799	5938971	0	0	0	180768735
9030	3534872	0	0	0	796546632	2565438	0	0	0	1035633924
9031	12839486	0	0	0	693246592	39470403	0	0	0	785228495
9032	37291294	0	0	0	671324778	5581426	0	0	0	665735549
9033	3937297	0	0	0	153749157	3747838	0	0	0	270469807
9101	420833	0	8826163	0	306454614	113991	0	508995	0	110300776
9102	3630495	0	31224023	0	328292623	350794	0	3342626	0	69703631
9103	194423	0	666122	0	3905478	170161	0	651502	0	4166608
9104	146168	0	756101	0	8215361	21502	0	34123	0	1670974
9105	7726448	0	20108286	0	74419315	864577	0	833588	0	14674409
9106	840462	0	5406948	0	16663957	162200	0	71032	0	7294021
9107	604358	0	3273727	0	20960410	436299	0	332354	0	7656730
9108	250946	0	8878189	0	14041613	139081	0	529378	0	4516464
9109	137019	0	1521245	0	2583362	22652	0	205012	0	663690
9110	20888	0	0	0	3391016	22711	0	0	0	2971155
9111	87907	0	0	0	3952234	12515	0	0	0	1863297
9112	20032	0	0	0	404509	29960	0	0	0	286204
9113	135673	0	0	0	21418810	108852	0	0	0	2306241
9114	147006	0	0	0	17635407	50256	0	0	0	7238608
9201	1871528	0	14849	0	25689804	1348135	0	6758	0	12413667
9202	1305783	0	509657	0	27520067	193147	0	58855	0	10861629
9203	37766	0	5135	0	740156	132761	0	13483	0	3129221
9204	65807	0	376854	0	2120002	4479	0	10597	0	326179
9205	703683	0	865890	0	32142710	126762	0	92013	0	12753839
9206	2500123	0	1329345	0	18198365	568032	0	64510	0	10130313
9207	8881955	0	841915	0	110466771	443761	0	181098	0	14311193
9208	544870	0	0	0	5399964	124874	0	0	0	2482955
9209	3247590	0	0	0	56538511	696127	0	0	0	20659152
9303	80722	0	22241	0	21232915	30843	0	6065	0	20710644
9304	508699	0	657328	0	9839757	108847	0	28295	0	5132893
9305	265751	0	0	0	10149689	183227	0	0	0	7076526
9306	10368746	0	0	0	71384236	5929477	0	0	0	38811354
9401	270515958	0	0	0	1375809432	51325799	0	0	0	417322450
9402	5910809	0	0	0	78711904	3996419	0	0	0	61375828
9403	1397586441	0	0	0	2266162889	224886846	0	0	0	927391166
9404	35199912	0	0	0	144685040	13242987	0	0	0	78617674
9405	240410460	0	0	0	782761551	27871288	0	0	0	329723284
9406	17616982	0	0	0	53758925	48486012	0	0	0	110910645
9501	18637325	0	0	0	77822775	1082942	0	0	0	7757925
9502	28861432	0	0	0	226525875	1782480	0	0	0	20671016
9503	190808142	0	0	0	1324472595	26923865	0	0	0	249065993
9504	51088694	0	0	0	873609352	19781683	0	0	0	415276986
9505	190893077	0	0	0	239597391	4219267	0	0	0	36100881
9506	1192731590	0	0	0	706853432	19044596	0	0	0	297534970
9507	3055465	0	0	0	49383128	966441	0	0	0	32583396
9508	3774654	0	0	0	27843149	2101911	0	0	0	30758255
9601	156769	0	0	0	1186534	16185	0	0	0	371779
9602	667801	0	0	0	10081074	659864	0	0	0	4502524
9603	29499177	0	0	0	181602419	9564757	0	0	0	107062286
9604	46173	0	0	0	328653	71345	0	0	0	2514109
9605	4473334	0	0	0	37941719	361472	0	0	0	4720833
9606	2137193	0	0	0	30089459	1676670	0	0	0	19992645
9607	2542355	0	0	0	24583721	2657343	0	0	0	23869282
9608	23185745	0	0	0	216889314	6381438	0	0	0	120613722
9609	8443357	0	0	0	39270698	1824786	0	0	0	11054121
9610	2994825	0	0	0	14238047	1218783	0	0	0	3008321
9611	704230	0	0	0	11502176	677926	0	0	0	6370105
9612	7361153	0	40327764	0	134358266	5394626	0	65008104	0	102752942
9613	3723742	0	0	0	33237300	344904	0	0	0	8090001
9614	85265	0	0	0	2804181	47068	0	0	0	2468564
9615	3612984	0	0	0	42096706	713083	0	0	0	12975436
9616	5302612	0	0	0	57584742	1694471	0	0	0	19359219
9617	4780507	0	0	0	25231103	954204	0	0	0	9583903
9618	527373	0	0	0	7230687	601931	0	0	0	14378561
9701	630831	0	0	0	2145018131	929448	0	0	0	1775390993
9702	106424	0	0	0	40798901	104090	0	0	0	47682230
9703	879626	0	0	0	193054937	495343	0	0	0	207465364
9704	98863	0	0	0	56602111	550697	0	0	0	58379898
9705	1584394	0	0	0	160521206	469644	0	0	0	134453957
9706	2057630	0	0	0	430682851	5549579	0	0	0	809499910
9999	0	0	0	0	28617242580	0	0	0	0	21851761377

## Sheet: Comtrade2002
Commodity Code	Import(Weight)	Import(Area)	Import(Quantity Number)	Import(Volume)	Import(Trade Value)	Export(Weight)	Export(Area)	Export(Quantity Number)	Export(Volume)	Export(Trade Value)
101	1764443	0	4379	0	478082365	2480450	0	5671	0	404572822
102	2446833	0	23055	0	5738188	1	0	1	0	18
103	16768036	0	231432	0	21083429	3658718	0	33222	0	5464643
104	7484	0	0	0	35888	1383908	0	0	0	2903731
105	353545	0	5039615	0	7133105	10902086	0	50660549	0	106363630
106	584709	0	0	0	15637313	530052	0	0	0	12779643
201	172436128	0	0	0	581639042	3268920	0	0	0	20786076
202	85647981	0	0	0	166537164	2374354	0	0	0	7075451
203	321964230	0	0	0	496977424	88949855	0	0	0	111820824
204	103261765	0	0	0	345306997	55172886	0	0	0	193546544
205	0	0	0	0	0	2021669	0	0	0	4726362
206	42884800	0	0	0	43969512	16805711	0	0	0	7750449
207	319662472	0	0	0	835398718	242064860	0	0	0	214683318
208	1001745	0	0	0	4304351	3919099	0	0	0	16997885
209	25214937	0	0	0	11559895	8730912	0	0	0	2593007
210	337256350	0	0	0	938130414	11682989	0	0	0	48471822
301	1934315	0	0	0	27561739	892772	0	0	0	8554576
302	93461399	0	0	0	209492816	81670549	0	0	0	264476216
303	70694962	0	0	0	151068618	163962352	0	0	0	147113042
304	158868636	0	0	0	649927595	32214101	0	0	0	114062397
305	3636393	0	0	0	14532646	6704486	0	0	0	52658376
306	48017608	0	0	0	304293872	58051380	0	0	0	335983636
307	11916456	0	0	0	40814419	31444224	0	0	0	107427790
401	183617118	0	0	0	41045219	155777147	0	0	0	170715180
402	39218340	0	0	0	64486300	171335074	0	0	0	236993276
403	174718373	0	0	0	197929047	22825583	0	0	0	40935423
404	26398185	0	0	0	33946230	52103098	0	0	0	29268666
405	83764581	0	0	0	209623087	38745634	0	0	0	106161039
406	318168536	0	0	0	1040710082	83393383	0	0	0	228030795
407	59713096	0	0	0	54677620	9616959	0	0	0	39327132
408	11237985	0	0	0	24093880	6501848	0	0	0	6877489
409	34232684	0	0	0	56720089	2193197	0	0	0	4111239
410	435636	0	0	0	2032169	129562	0	0	0	236205
501	5847	0	0	0	524367	682	0	0	0	80887
502	1933448	0	0	0	14297148	1373105	0	0	0	12148331
503	88582	0	0	0	792762	97393	0	0	0	685383
504	4919584	0	0	0	9395229	5465098	0	0	0	19815972
505	3519906	0	0	0	9194413	1585322	0	0	0	3386157
506	46473874	0	0	0	17946421	2766936	0	0	0	1925598
507	2708245	0	0	0	1391900	6827	0	0	0	171591
508	1431937	0	0	0	1085453	3725195	0	0	0	4387540
509	71612	0	0	0	253120	18475	0	0	0	652343
510	19450	0	0	0	390786	403	0	0	0	189176
511	70729088	0	0	0	34925208	28418451	0	0	0	13114101
601	19913597	0	0	0	64870608	8359321	0	0	0	8671195
602	181917291	0	0	0	364758944	31368364	0	0	0	18802819
603	199919297	0	0	0	833068487	7151245	0	0	0	26421218
604	11281950	0	0	0	40628865	5258159	0	0	0	2355962
701	430344229	0	0	0	153032115	225348181	0	0	0	79873856
702	321139886	0	0	0	461067929	5274372	0	0	0	9348609
703	315485884	0	0	0	137363522	7229058	0	0	0	9460249
704	173994552	0	0	0	139360059	8987353	0	0	0	7678889
705	160437583	0	0	0	156510441	5038278	0	0	0	7961502
706	105572579	0	0	0	59064981	31637447	0	0	0	9961747
707	77142978	0	0	0	98062837	1168824	0	0	0	1463519
708	36385720	0	0	0	72699179	51200430	0	0	0	12491446
709	430565764	0	0	0	641914861	2823622	0	0	0	8560423
710	1615278711	0	0	0	283841536	64431997	0	0	0	53812346
711	18280576	0	0	0	14341520	715312	0	0	0	1517616
712	25341181	0	0	0	55995747	2939083	0	0	0	9708559
713	148852856	0	0	0	80134026	301637104	0	0	0	59959138
714	26414781	0	0	0	25237247	722416	0	0	0	1562414
801	36486237	0	0	0	68064699	2773742	0	0	0	5319646
802	35972527	0	0	0	99241406	1933294	0	0	0	4250081
803	853007770	0	0	0	495737267	5082616	0	0	0	4118030
804	112260056	0	0	0	123396683	2445660	0	0	0	4065629
805	736024709	0	0	0	454192951	25582889	0	0	0	15115484
806	302830466	0	0	0	456393559	9947731	0	0	0	19827296
807	197966279	0	0	0	131732538	7235858	0	0	0	6531645
808	584997811	0	0	0	489873206	18936643	0	0	0	14050305
809	359142972	0	0	0	227729851	1752983	0	0	0	3849811
810	92640174	0	0	0	207893398	2616395	0	0	0	4902799
811	56483519	0	0	0	72513638	3145556	0	0	0	5489205
812	19259882	0	0	0	18331680	769684	0	0	0	1040387
813	28459116	0	0	0	80828643	4491210	0	0	0	7380009
814	1690781	0	0	0	2016315	102621	0	0	0	298347
901	143559161	0	0	0	201951203	8710315	0	0	0	39023552
902	191759302	0	0	0	320498257	30014030	0	0	0	191636134
903	3370	0	0	0	33795	28444	0	0	0	193229
904	11448343	0	0	0	26298614	2009509	0	0	0	7260323
905	219219	0	0	0	15594113	90350	0	0	0	13652634
906	1076426	0	0	0	1671606	74694	0	0	0	307360
907	355220	0	0	0	1506201	34271	0	0	0	307006
908	756201	0	0	0	5552533	171824	0	0	0	1388902
909	7882059	0	0	0	10968610	723293	0	0	0	1928425
910	22607972	0	0	0	29940600	4411834	0	0	0	13312973
1001	1293307789	0	0	0	211515650	1624011865	0	0	0	178150637
1002	1341821	0	0	0	424858	47005	0	0	0	21121
1003	110009746	0	0	0	23582848	950888724	0	0	0	106583560
1004	24459416	0	0	0	3704555	143900506	0	0	0	15569953
1005	1536027888	0	0	0	211912006	12055046	0	0	0	3369001
1006	664302991	0	0	0	303233712	37863695	0	0	0	40520755
1007	5436119	0	0	0	1309369	25672	0	0	0	12090
1008	92198806	0	0	0	11081442	233227	0	0	0	507009
1101	155194083	0	0	0	26514151	136404646	0	0	0	35936938
1102	23467114	0	0	0	11064200	6013677	0	0	0	3369306
1103	21530943	0	0	0	6240806	31588912	0	0	0	8539532
1104	94741587	0	0	0	11275825	131114621	0	0	0	47545760
1105	35028601	0	0	0	31877032	6866227	0	0	0	5519311
1106	1786217	0	0	0	2335028	741034	0	0	0	1140535
1107	18070319	0	0	0	7094118	400543124	0	0	0	141559939
1108	119412991	0	0	0	52481510	16976019	0	0	0	6555087
1109	28854860	0	0	0	20631340	3050188	0	0	0	2210223
1201	982619704	0	0	0	217250140	8079710	0	0	0	2382439
1202	91476038	0	0	0	66901152	680385	0	0	0	1012330
1203	12848702	0	0	0	1396817	6875	0	0	0	14956
1204	22183191	0	0	0	7312873	8635129	0	0	0	2404480
1205	327005018	0	0	0	85435310	207321206	0	0	0	46888384
1206	40151083	0	0	0	14724912	221210	0	0	0	340650
1207	115751550	0	0	0	33451669	2746647	0	0	0	2051238
1208	11630225	0	0	0	5926706	7902816	0	0	0	3551422
1209	31723763	0	0	0	109834248	4170351	0	0	0	60157645
1210	21459141	0	0	0	11768095	766124	0	0	0	3208093
1211	7747103	0	0	0	35541460	1304296	0	0	0	6734505
1212	26171323	0	0	0	15370161	1464597	0	0	0	4507725
1213	29153979	0	0	0	2361762	173299	0	0	0	239528
1214	17844527	0	0	0	5412291	174143	0	0	0	233714
1301	10629656	0	0	0	16899096	6869947	0	0	0	17921752
1302	170602061	0	0	0	104017655	8472786	0	0	0	38105853
1401	12104250	0	0	0	8171549	92983	0	0	0	885646
1402	8925	0	0	0	27776	3484	0	0	0	10444
1403	152804	0	0	0	365985	270	0	0	0	36954
1404	13263839	0	0	0	8217222	247318	0	0	0	571780
1501	33241633	0	0	0	14416049	8650224	0	0	0	3278258
1502	30773877	0	0	0	14454286	8638833	0	0	0	3594076
1503	9460581	0	0	0	2965944	27988385	0	0	0	7182473
1504	35903016	0	0	0	33237980	2035950	0	0	0	9670024
1505	12042154	0	0	0	18537583	9253646	0	0	0	41204051
1506	253580	0	0	0	317548	2659317	0	0	0	1546361
1507	64671865	0	0	0	30976673	11255367	0	0	0	6477050
1508	6227102	0	0	0	5140932	1238232	0	0	0	1606911
1509	34649996	0	0	0	87088466	7210757	0	0	0	18629301
1510	8027581	0	0	0	13465186	791301	0	0	0	812516
1511	646948306	0	0	0	252628868	52793871	0	0	0	30738759
1512	142354625	0	0	0	97663304	28435994	0	0	0	16451454
1513	92017281	0	0	0	42358456	2197951	0	0	0	1802535
1514	135830527	0	0	0	64220601	219859710	0	0	0	122818550
1515	39515675	0	0	0	35255666	18334726	0	0	0	21163876
1516	41377235	0	0	0	75039578	53585187	0	0	0	39607613
1517	41961627	0	0	0	45234949	65005819	0	0	0	88154856
1518	14533669	0	0	0	8670046	13447110	0	0	0	12198662
1520	28291424	0	0	0	22371809	1111760	0	0	0	639393
1521	1332926	0	0	0	4897968	193657	0	0	0	862879
1522	139100	0	0	0	187237	245874	0	0	0	610237
1601	62568736	0	0	0	151011260	4312065	0	0	0	7228095
1602	304750019	0	0	0	899412238	29040240	0	0	0	118504589
1603	1731950	0	0	0	4337014	417934	0	0	0	2361257
1604	212139981	0	0	0	570905524	20520911	0	0	0	75686696
1605	48467744	0	0	0	260909406	5274862	0	0	0	31067161
1701	1465726580	0	0	0	694983399	458157152	0	0	0	155366800
1702	231881830	0	0	0	105245331	141032026	0	0	0	58911037
1703	702666735	0	0	0	64795617	38438926	0	0	0	7579120
1704	113031789	0	0	0	265703581	73464013	0	0	0	264719948
1801	130963530	0	0	0	238996386	3268009	0	0	0	4362502
1802	3620789	0	0	0	242952	2168519	0	0	0	1579053
1803	15290006	0	0	0	38120844	13919285	0	0	0	23736475
1804	47621182	0	0	0	133193571	8073892	0	0	0	24840105
1805	5690317	0	0	0	11743731	17370769	0	0	0	30954659
1806	253908498	0	0	0	664946085	140863550	0	0	0	455310941
1901	113905921	0	0	0	244234662	130683982	0	0	0	173781888
1902	250641243	0	0	0	201411228	13137082	0	0	0	26501834
1903	930410	0	0	0	636685	220371	0	0	0	403697
1904	116566735	0	0	0	115033683	163900960	0	0	0	391729928
1905	487379498	0	0	0	898942187	297678200	0	0	0	670785128
2001	37724573	0	0	0	41382598	3687026	0	0	0	9776582
2002	395038009	0	0	0	212031801	3560382	0	0	0	4340869
2003	15893473	0	0	0	16682443	187196	0	0	0	343608
2004	357507934	0	0	0	223630667	46713947	0	0	0	45941579
2005	368487866	0	0	0	297154869	68676781	0	0	0	99353190
2006	8164231	0	0	0	19293266	462939	0	0	0	1231160
2007	41804116	0	0	0	68792091	13096875	0	0	0	31364742
2008	235376048	0	0	0	251932559	20232061	0	0	0	43950907
2009	576600226	0	0	0	447466670	36941337	0	0	0	44403317
2101	20006973	0	0	0	119378323	27888880	0	0	0	116587641
2102	36053604	0	0	0	28640406	23084145	0	0	0	53546286
2103	281920672	0	0	0	333148794	75167275	0	0	0	145049995
2104	29944278	0	0	0	50876389	25157918	0	0	0	52180749
2105	93748474	0	0	0	195121935	36732454	0	0	0	78286819
2106	139941779	0	0	0	574536880	131258629	0	0	0	449282862
2201	501996685	0	0	497758191	136724511	31872028	0	0	30688474	17084384
2202	442046266	0	0	408123298	369328732	219642851	0	0	209576639	146807090
2203	745705090	0	0	672116555	499563140	451478361	0	0	416663304	429170505
2204	1498232459	0	0	1687034638	3882820156	34042463	0	0	27639963	200178965
2205	13847878	0	0	12931814	17121581	1093259	0	0	604303	3403114
2206	20442946	0	0	17600411	31948114	29636091	0	0	26309654	35296988
2207	66618592	0	0	148384464	44748252	190913632	0	0	229119289	101493483
2208	178673367	0	0	92837800	651818488	778596273	0	0	330078125	4157008237
2209	15066950	0	0	13812672	14067359	3572729	0	0	2382321	2692853
2301	209292384	0	0	0	136190220	17464335	0	0	0	11498344
2302	93890441	0	0	0	9956943	103415224	0	0	0	12651397
2303	277855349	0	0	0	34474708	57399118	0	0	0	8578494
2304	1423476606	0	0	0	298014131	26687951	0	0	0	6295937
2305	13845475	0	0	0	2530585	7	0	0	0	5711
2306	895821473	0	0	0	98801576	294455628	0	0	0	26139518
2307	0	0	0	0	0	109427	0	0	0	51117
2308	232263334	0	0	0	20437195	24355329	0	0	0	3910810
2309	1203474638	0	0	0	522147180	299529275	0	0	0	407565464
2401	153882690	0	0	0	479906492	13089864	0	0	0	41664883
2402	10827516	0	0	0	298573064	64498109	0	0	0	1279869179
2403	12522876	0	0	0	55072752	15444612	0	0	0	154871218
2501	301366027	0	0	0	18255413	313058860	0	0	0	29449886
2502	100521	0	0	0	66830	5328335	0	0	0	65997
2503	5648595	0	0	0	592866	687691	0	0	0	1410576
2504	22384272	0	0	0	13052589	2687828	0	0	0	4446194
2505	201340293	0	0	0	21572763	166877872	0	0	0	11343659
2506	4417331	0	0	0	2701738	273696	0	0	0	617143
2507	78348295	0	0	0	11656484	2953958517	0	0	0	331056046
2508	657677724	0	0	0	51761542	84652525	0	0	0	33094595
2509	4198500	0	0	0	527512	25282245	0	0	0	3134444
2510	10185008	0	0	0	1682368	382158	0	0	0	117102
2511	75123601	0	0	0	4841606	2359621	0	0	0	1096933
2512	34543278	0	0	0	8936804	815084	0	0	0	770147
2513	120452883	0	0	0	6073369	1795252	0	0	0	2339745
2514	28223803	0	0	0	10261219	525281	0	0	0	436956
2515	13121711	0	0	0	14231389	4236014	0	0	0	812735
2516	1889231480	0	0	0	58701097	6524327	0	0	0	2662423
2517	825458804	0	0	0	25437601	12465255407	0	0	0	70606153
2518	173807997	0	0	0	5372303	114350909	0	0	0	7110531
2519	111331235	0	0	0	28860078	26097184	0	0	0	23879239
2520	610497276	0	0	0	21677406	59756283	0	0	0	16766609
2521	21527412	0	0	0	1531874	95359925	0	0	0	3770126
2522	13837745	0	0	0	2479281	90254574	0	0	0	13079604
2523	694890295	0	0	0	41509445	518012633	0	0	0	55695677
2524	118140	0	0	0	515303	1035	0	0	0	23564
2525	13816709	0	0	0	3797804	4183114	0	0	0	4316597
2526	66311688	0	0	0	15549731	4083534	0	0	0	1959884
2528	9936065	0	0	0	2591377	164550	0	0	0	236872
2529	113432770	0	0	0	12044791	959962	0	0	0	307827
2530	635404748	0	0	0	38999991	18346315	0	0	0	16955509
2601	13676280300	0	0	0	277766187	349636	0	0	0	207058
2602	1229696	0	0	0	902328	207757	0	0	0	602415
2603	788601	0	0	0	1351403	38374	0	0	0	383417
2604	1055356	0	0	0	208572	541687	0	0	0	1452576
2605	112	0	0	0	4648	6	0	0	0	56
2607	75448	0	0	0	31209	13997	0	0	0	33963
2608	229044021	0	0	0	42055575	15744461	0	0	0	4325489
2609	0	0	0	0	0	25744	0	0	0	958558
2610	139721091	0	0	0	7666217	26001	0	0	0	44337
2611	126148	0	0	0	41998	0	0	0	0	0
2612	6	0	0	0	7534	900	0	0	0	4348
2613	23558500	0	0	0	89309530	499499	0	0	0	2027999
2614	188479112	0	0	0	48981802	23684	0	0	0	268717
2615	30521372	0	0	0	14641944	5187398	0	0	0	3557307
2616	424719	0	0	0	320325771	48737	0	0	0	7462624
2617	95631	0	0	0	192693	265559	0	0	0	203142
2618	425623327	0	0	0	7468440	8468841	0	0	0	923926
2619	191389169	0	0	0	77598386	680966	0	0	0	251893
2620	24925429	0	0	0	430375185	23194669	0	0	0	105057633
2621	96485862	0	0	0	16199261	25710799	0	0	0	17307440
2701	30718874016	0	0	0	1379785474	614016213	0	0	0	56317197
2702	3521745	0	0	0	470838	3691505	0	0	0	1022468
2703	465157841	0	0	0	42272729	51159110	0	0	0	6252536
2704	357827964	0	0	0	33685472	409042960	0	0	0	38618955
2706	5921799	0	0	0	1059514	4197575	0	0	0	2129004
2707	281266053	0	0	0	68159467	680126444	0	0	0	172967818
2708	10773461	0	0	0	2878769	46642504	0	0	0	11162116
2709	41491128740	0	0	0	7595615905	82635897484	0	0	0	15203590441
2710	21034695707	0	0	0	4707622102	23631983843	0	0	0	4943692916
2711	2969252535	0	0	0	590182562	14864119852	0	0	0	2471233310
2712	21688330	0	0	0	24642676	96246599	0	0	0	39145502
2713	869089576	0	0	0	85590560	98518187	0	0	0	14334364
2714	232886917	0	0	0	37398316	113278422	0	0	0	17204808
2715	46274485	0	0	0	10638064	359682937	0	0	0	36534657
2716	11984227966	11984227966	0	0	289201323	5366159872	5366159872	0	0	141471972
2801	4258378	0	0	0	12157644	10517108	0	0	0	14091148
2802	354932	0	0	0	617547	655950	0	0	0	830306
2803	42458184	0	0	0	38639734	74965872	0	0	0	60001712
2804	134231762	0	0	0	162470931	17237142	0	0	0	31915598
2805	8632164	0	0	0	16737719	894617	0	0	0	4035422
2806	2075650	0	0	0	1696804	13663228	0	0	0	3566270
2807	331457457	0	0	0	5162660	89238166	0	0	0	4280335
2808	5709893	0	0	0	2930194	1943522	0	0	0	5236188
2809	194430697	0	0	0	54849615	18783862	0	0	0	10383104
2810	10559435	0	0	0	5744770	248026	0	0	0	14331636
2811	152031811	0	0	0	78057026	65857132	0	0	0	124750033
2812	26943963	0	0	0	18121258	481665	0	0	0	7420788
2813	5868958	0	0	0	1808872	228527	0	0	0	2935508
2814	121390463	0	0	0	21278665	223595649	0	0	0	28045296
2815	337195853	0	0	0	43886866	539940118	0	0	0	55082351
2816	12336572	0	0	0	3530024	259699	0	0	0	310994
2817	7903365	0	0	0	7669965	9688676	0	0	0	11556144
2818	13436744	0	0	0	10509043	5402921	0	0	0	12541336
2819	4332162	0	0	0	7222568	5539	0	0	0	18398
2820	6037201	0	0	0	1962257	279008	0	0	0	522095
2821	51788887	0	0	0	35631265	20454540	0	0	0	25862214
2822	477072	0	0	0	4550389	1267028	0	0	0	17089973
2823	5725530	0	0	0	12843020	1502554	0	0	0	4195447
2824	6138070	0	0	0	5455596	3444066	0	0	0	4375746
2825	46522270	0	0	0	63273618	6767317	0	0	0	37366024
2826	13572638	0	0	0	73524849	5490354	0	0	0	19461570
2827	126263026	0	0	0	58336441	30756569	0	0	0	25452474
2828	10419040	0	0	0	10720288	45142598	0	0	0	26013846
2829	3328285	0	0	0	4049188	1187724	0	0	0	6748408
2830	6488001	0	0	0	5317547	807765	0	0	0	779241
2831	1750112	0	0	0	2036519	47541	0	0	0	68866
2832	7703786	0	0	0	3024962	35516295	0	0	0	6953522
2833	118651081	0	0	0	30738184	21410299	0	0	0	11838660
2834	38042195	0	0	0	12221888	3407059	0	0	0	4420733
2835	206281585	0	0	0	93499662	62595051	0	0	0	55029079
2836	297745677	0	0	0	58222785	52647084	0	0	0	38778589
2837	4481951	0	0	0	3571615	1233286	0	0	0	390726
2838	7517174	0	0	0	7911316	1866866	0	0	0	3681332
2839	37964905	0	0	0	18596817	19766845	0	0	0	12195651
2840	32859075	0	0	0	12878189	4922399	0	0	0	4491266
2841	3605058	0	0	0	10062406	1802800	0	0	0	3591278
2842	3884145	0	0	0	6527726	52473999	0	0	0	26665282
2843	1845782	0	0	0	33864546	947744	0	0	0	404139195
2844	2782684	0	0	0	318709084	7403165	0	0	0	122186833
2845	12549	0	0	0	3375324	8254	0	0	0	2239497
2846	3776648	0	0	0	19285525	1095133	0	0	0	11929466
2847	25769684	0	0	0	8158702	2855547	0	0	0	1372216
2848	92927	0	0	0	1141648	94768	0	0	0	228082
2849	29018202	0	0	0	41649300	470853	0	0	0	2170604
2850	22109698	0	0	0	10480565	384684	0	0	0	10705021
2851	2467080	0	0	0	9971716	3021636	0	0	0	17960179
2901	95876463	0	0	0	43606021	1413681171	0	0	0	590013683
2902	691720057	0	0	0	348937665	1279434906	0	0	0	384635974
2903	273925607	0	0	0	242595875	129753239	0	0	0	209717258
2904	40214847	0	0	0	106227593	18338550	0	0	0	26666429
2905	302677159	0	0	0	241433070	87950000	0	0	0	67392568
2906	16230558	0	0	0	51801923	2927146	0	0	0	22801910
2907	136954290	0	0	0	128970530	26677191	0	0	0	150834113
2908	1667351	0	0	0	11053910	6378116	0	0	0	30473753
2909	119369250	0	0	0	218923467	28388602	0	0	0	88928743
2910	70356557	0	0	0	63087584	1253276	0	0	0	2824434
2911	710859	0	0	0	3481669	53030	0	0	0	473736
2912	27212322	0	0	0	47380291	11037403	0	0	0	50219583
2913	546452	0	0	0	11899419	211448	0	0	0	674595
2914	173572300	0	0	0	134587372	60231380	0	0	0	141813348
2915	252977053	0	0	0	210697134	165473036	0	0	0	223479696
2916	383023623	0	0	0	226897714	36572422	0	0	0	138847361
2917	222414528	0	0	0	162589660	395797932	0	0	0	240841142
2918	61610296	0	0	0	192743359	41677033	0	0	0	136929739
2919	9714774	0	0	0	20357460	22864507	0	0	0	50733839
2920	21721271	0	0	0	31898462	8511684	0	0	0	26442673
2921	71783540	0	0	0	307513930	272183395	0	0	0	242394846
2922	89040196	0	0	0	431367765	72792791	0	0	0	558972290
2923	15534883	0	0	0	31233080	16921954	0	0	0	25805693
2924	31635943	0	0	0	229356258	38442718	0	0	0	284796487
2925	3317553	0	0	0	27140959	33695089	0	0	0	114127053
2926	5622679	0	0	0	26956599	72249439	0	0	0	217806927
2927	3441373	0	0	0	11462113	586925	0	0	0	4986070
2928	1747675	0	0	0	10622651	1545217	0	0	0	14529675
2929	36891423	0	0	0	68002760	5664557	0	0	0	16615424
2930	23108592	0	0	0	290667910	8929058	0	0	0	740770747
2931	12182290	0	0	0	54030038	117208610	0	0	0	251293793
2932	16277399	0	0	0	1795457164	211033186	0	0	0	181637123
2933	90679970	0	0	0	1769857475	47926333	0	0	0	1183518159
2934	4993100	0	0	0	614107281	10024753	0	0	0	806917507
2935	3376670	0	0	0	180840853	633897	0	0	0	115183720
2936	14401928	0	0	0	104070146	4182224	0	0	0	36978115
2937	546770	0	0	0	58582429	405193	0	0	0	546064768
2938	961265	0	0	0	4895223	27959	0	0	0	7557429
2939	1802532	0	0	0	168798119	131333	0	0	0	41306900
2940	15736491	0	0	0	29788482	1922501	0	0	0	14141860
2941	6984847	0	0	0	354028484	7024195	0	0	0	335835372
2942	1112191	0	0	0	14590127	1712901	0	0	0	36590150
3001	643266	0	0	0	34431561	392210	0	0	0	18009444
3002	7551620	0	0	0	701210483	4389632	0	0	0	528492261
3003	16171728	0	0	0	252325981	3318293	0	0	0	273405988
3004	120429568	0	0	0	9259134412	138949844	0	0	0	13271783345
3005	12319955	0	0	0	212647247	11282274	0	0	0	328441126
3006	15400557	0	0	0	212445914	3087559	0	0	0	435493416
3101	15918149	0	0	0	7401222	6927984	0	0	0	5616380
3102	1790857112	0	0	0	204452890	267571393	0	0	0	42343818
3103	240745768	0	0	0	34190854	4050037	0	0	0	983600
3104	401564789	0	0	0	33432140	21004589	0	0	0	3542360
3105	934189126	0	0	0	131290288	328288492	0	0	0	59285655
3201	1682078	0	0	0	1984817	448431	0	0	0	1298713
3202	4791424	0	0	0	5332587	36144252	0	0	0	33898166
3203	2854655	0	0	0	18727858	1154326	0	0	0	12285489
3204	62619039	0	0	0	373486133	79569738	0	0	0	499559398
3205	247126	0	0	0	2881500	645323	0	0	0	14830106
3206	186255380	0	0	0	223679769	239764724	0	0	0	411223883
3207	20674239	0	0	0	54687745	12950827	0	0	0	122878187
3208	65968821	0	0	0	257383711	142032503	0	0	0	440555806
3209	75599259	0	0	0	145077134	73156610	0	0	0	114378613
3210	6255276	0	0	0	17331931	9997738	0	0	0	31004195
3211	862404	0	0	0	2708409	5743260	0	0	0	10498490
3212	7545182	0	0	0	53400589	8528733	0	0	0	95161920
3213	5325116	0	0	0	16427768	8197305	0	0	0	58456023
3214	113192966	0	0	0	152350297	43338510	0	0	0	108156349
3215	41231267	0	0	0	320298465	64427379	0	0	0	511546245
3301	13772267	0	0	0	150487908	6899216	0	0	0	88697513
3302	59113219	0	0	0	606529249	75475631	0	0	0	534798690
3303	110098173	0	0	0	570474640	40525696	0	0	0	368122367
3304	127015520	0	0	0	864442500	53340670	0	0	0	798555546
3305	131126784	0	0	0	338857043	91127780	0	0	0	436340167
3306	28330764	0	0	0	104858425	113420825	0	0	0	403040963
3307	331623318	0	0	0	360957350	191279248	0	0	0	722200422
3401	1141312255	0	0	0	178916170	130383619	0	0	0	210675840
3402	832196929	0	0	0	698981018	615614963	0	0	0	699115991
3403	49708894	0	0	0	82932474	51297036	0	0	0	126420181
3404	30885662	0	0	0	62745496	15346258	0	0	0	45018471
3405	35177959	0	0	0	55412083	24900913	0	0	0	68495676
3406	48944810	0	0	0	88761596	11652469	0	0	0	48978312
3407	2686849	0	0	0	11574998	685043	0	0	0	5692146
3501	8122836	0	0	0	28890011	5161009	0	0	0	20354329
3502	8145385	0	0	0	28367500	1984778	0	0	0	9655427
3503	14883542	0	0	0	59431851	6769942	0	0	0	37632717
3504	6544904	0	0	0	27274275	11433119	0	0	0	39698362
3505	157209732	0	0	0	90245327	25921907	0	0	0	33123229
3506	68403678	0	0	0	174873471	70463117	0	0	0	189560825
3507	8598032	0	0	0	89715782	4281929	0	0	0	248028160
3604	14178523	0	0	0	28584386	55103	0	0	0	1141497
3605	1966979	0	0	0	8460731	72082	0	0	0	352536
3606	3588920	0	0	0	4838453	17414466	0	0	0	17441887
3701	106581505	0	0	0	262447092	34271928	0	0	0	327836439
3702	17588335	0	0	0	493957887	15292956	0	0	0	417373762
3703	21503058	0	0	0	93463946	54551665	0	0	0	282103541
3704	100846	0	0	0	2345967	989607	0	0	0	2300852
3705	729490	0	0	0	13556943	326806	0	0	0	71315181
3706	2131869	0	0	0	10954078	1272887	0	0	0	60139904
3707	35103922	0	0	0	300103873	22422120	0	0	0	218454641
3801	16069348	0	0	0	25141306	8366526	0	0	0	18338476
3802	72227666	0	0	0	36010526	30463034	0	0	0	44603611
3803	12054416	0	0	0	5145592	563193	0	0	0	834332
3804	48064941	0	0	0	9057819	4061321	0	0	0	1123099
3805	2250121	0	0	0	2457948	325659	0	0	0	774709
3806	31971610	0	0	0	36891694	9906676	0	0	0	17927770
3807	76573	0	0	0	176198	1773155	0	0	0	1611227
3808	88053267	0	0	0	500779722	182927828	0	0	0	1030091591
3809	103697691	0	0	0	95239002	30572363	0	0	0	59635900
3810	9217976	0	0	0	17292539	8084245	0	0	0	38440028
3811	3862235	0	0	0	9428753	122025693	0	0	0	228228728
3812	29856691	0	0	0	82121751	32144141	0	0	0	60167913
3813	3331160	0	0	0	4486544	19157351	0	0	0	19256289
3814	6755707	0	0	0	15114022	35217238	0	0	0	55243949
3815	17702829	0	0	0	121996554	28382915	0	0	0	227684323
3816	54824909	0	0	0	22791106	82892040	0	0	0	74719298
3817	52147224	0	0	0	52703611	6741584	0	0	0	10133391
3818	664576	0	0	0	65462392	567563	0	0	0	136645500
3819	6039297	0	0	0	8089570	20085544	0	0	0	33202852
3820	18338601	0	0	0	12575466	19211307	0	0	0	17116351
3821	1569940	0	0	0	28210917	3300594	0	0	0	67168128
3822	7829355	0	0	0	754114612	8392182	0	0	0	970010741
3823	219322634	0	0	0	128973434	74138995	0	0	0	67577279
3824	363614544	0	0	0	807695672	616958408	0	0	0	979222845
3825	3470099	0	0	0	3088231	5256127	0	0	0	7131220
3901	1298827930	0	0	0	958216188	30350790	0	0	0	62872145
3902	679529540	0	0	0	494020295	240248120	0	0	0	185935880
3903	265823128	0	0	0	291502713	301696784	0	0	0	293251022
3904	410847467	0	0	0	355076852	154966323	0	0	0	166848992
3905	50198080	0	0	0	80926077	46358715	0	0	0	61539495
3906	160256589	0	0	0	243902537	189760241	0	0	0	349632297
3907	487024054	0	0	0	766987324	298959043	0	0	0	500134599
3908	69536912	0	0	0	182068778	13468522	0	0	0	30363671
3909	77317995	0	0	0	129202621	118566158	0	0	0	218121144
3910	47913428	0	0	0	107598622	125451036	0	0	0	305954735
3911	45301901	0	0	0	111953794	19407715	0	0	0	129169959
3912	35172156	0	0	0	112403563	4173347	0	0	0	41165435
3913	3532481	0	0	0	37135786	3815648	0	0	0	34507022
3914	10093096	0	0	0	31530072	0	0	0	0	0
3915	15498688	0	0	0	7285474	117193476	0	0	0	40201240
3916	153238340	0	0	0	123294948	20940204	0	0	0	61600147
3917	100167212	0	0	0	235846439	144287486	0	0	0	441746392
3918	77609208	0	0	0	118862506	69352245	0	0	0	173809724
3919	107728236	0	0	0	343002421	41619195	0	0	0	262895900
3920	742555121	0	0	0	1273736797	328215737	0	0	0	872252189
3921	319558443	0	0	0	573016303	86404374	0	0	0	392696631
3922	19782032	0	0	0	105493642	14543584	0	0	0	81022237
3923	923619179	0	0	0	1303060210	647191313	0	0	0	776822874
3924	101787412	0	0	0	306565030	22963841	0	0	0	118969465
3925	64603484	0	0	0	155565685	43994830	0	0	0	193668797
3926	557709751	0	0	0	1390379466	153142583	0	0	0	787503925
4001	107933389	0	0	0	84972207	9224728	0	0	0	6787559
4002	247804457	0	0	0	252408395	166479224	0	0	0	245874714
4003	2256869	0	0	0	1010725	298932	0	0	0	671437
4004	6665132	0	0	0	2369392	8469618	0	0	0	8637466
4005	50820477	0	0	0	83114904	68936321	0	0	0	130661628
4006	4200621	0	0	0	17231886	3273615	0	0	0	8391750
4007	1601579	0	0	0	3848868	373104	0	0	0	1952826
4008	25392573	0	0	0	103477991	41038598	0	0	0	121695834
4009	29778184	0	0	0	242776134	19090794	0	0	0	132817254
4010	16666607	0	0	0	105668335	8485988	0	0	0	115516983
4011	510742506	0	47867794	0	1427881252	229032996	0	20368592	0	778663473
4012	37255012	0	0	0	25611647	25245913	0	0	0	36566715
4013	4804775	0	16572887	0	13014684	708995	0	319928	0	2014790
4014	4077345	0	0	0	44325246	1624632	0	0	0	31533905
4015	36454001	0	0	0	137335746	3770922	0	0	0	28835258
4016	77567681	0	0	0	388658962	45997145	0	0	0	382991288
4017	4154416	0	0	0	9380323	1677144	0	0	0	3745552
4101	30442479	0	0	0	51095315	52009119	0	0	0	98252204
4102	5303734	0	0	0	24526751	49285612	0	0	0	112959564
4103	460629	0	0	0	1452395	2496476	0	0	0	1555994
4104	5506852	0	0	0	27480370	17300791	0	0	0	92798765
4105	189882	0	0	0	5258385	248583	0	0	0	11699346
4106	525650	0	0	0	2597150	726842	0	0	0	4937793
4107	9572325	0	0	0	161224333	20937097	0	0	0	194579126
4112	193001	0	0	0	5439225	432115	0	0	0	31906287
4113	178677	0	0	0	3606180	76839	0	0	0	2105412
4114	827706	0	0	0	11181571	244298	0	0	0	7938279
4115	3853039	0	0	0	3608953	2450490	0	0	0	5356998
4201	4090380	0	0	0	36869757	1147256	0	0	0	40147366
4202	143020145	0	0	0	1065433711	16483354	0	0	0	233426107
4203	17677374	0	0	0	403175928	2092321	0	0	0	79655619
4204	339075	0	0	0	2677902	233542	0	0	0	2993565
4205	7196987	0	0	0	75835016	1289278	0	0	0	36375833
4206	85184	0	0	0	802391	49035	0	0	0	2721270
4301	186786	0	0	0	10735923	2315930	0	0	0	6901958
4302	770176	0	0	0	37776421	793928	0	0	0	39292350
4303	217078	0	0	0	13802920	81166	0	0	0	6114940
4304	432637	0	0	0	4578714	186008	0	0	0	4110600
4401	173865251	0	0	0	14887788	102319194	0	0	0	7336152
4402	45676822	0	0	0	17632398	1351604	0	0	0	1780056
4403	372682051	0	0	0	91419240	55630365	0	0	0	14286303
4404	13634073	0	0	0	5033004	22250677	0	0	0	4944814
4405	1334128	0	0	0	883367	703276	0	0	0	602058
4406	44224336	0	0	0	8316723	128291	0	0	0	172737
4407	4712880151	0	0	0	1695950061	158589635	0	0	0	59175815
4408	27318016	0	0	0	65559952	4380411	0	0	0	18185931
4409	214392708	0	0	0	199449390	41074804	0	0	0	39184631
4410	805976474	0	0	0	258586988	143397093	0	0	0	46046667
4411	639820183	0	0	0	390509567	97299870	0	0	0	32207179
4412	843956458	0	0	0	504647261	35306309	0	0	0	25821327
4413	20441363	0	0	0	13331821	1252094	0	0	0	2576795
4414	11939862	0	0	0	32824969	1644253	0	0	0	8145233
4415	352951095	0	16236804	0	141083928	321093895	0	11380294	0	113499644
4416	20163814	0	0	0	23314476	114943	0	0	0	250919
4417	7792021	0	0	0	12632286	949900	0	0	0	4767746
4418	261017249	0	0	0	512304664	28981622	0	0	0	80680879
4419	23054109	0	0	0	61405110	2140830	0	0	0	12636005
4420	18905857	0	0	0	63625537	1158032	0	0	0	7730255
4421	144887414	0	0	0	201020192	8696140	0	0	0	33017837
4501	207319	0	0	0	648701	32041	0	0	0	228502
4502	207929	0	0	0	671577	77004	0	0	0	332358
4503	606836	0	0	0	8303866	23534	0	0	0	219202
4504	4081689	0	0	0	9564579	631111	0	0	0	3145722
4601	5108181	0	0	0	9225304	327334	0	0	0	1918809
4602	24358519	0	0	0	64724560	724637	0	0	0	3756396
4701	78224197	0	0	0	40477357	7494709	0	0	0	2946375
4702	6180960	0	0	0	3075666	61806	0	0	0	588645
4703	1665981941	0	0	0	708396220	628357	0	0	0	415862
4704	92180590	0	0	0	45074654	13010	0	0	0	71793
4705	53965085	0	0	0	18595282	75056	0	0	0	88656
4706	44111595	0	0	0	44653283	12758166	0	0	0	8752974
4707	73793791	0	0	0	13295551	1226309951	0	0	0	145693340
4801	1936949918	0	0	0	1014773147	160954800	0	0	0	80002675
4802	1389071296	0	0	0	1104112460	243904350	0	0	0	365313678
4803	130701225	0	0	0	142890883	40405311	0	0	0	43464752
4804	787760601	0	0	0	425279796	47848374	0	0	0	45923224
4805	445452328	0	0	0	231714202	513202254	0	0	0	261302871
4806	65474568	0	0	0	85929826	9657852	0	0	0	24163083
4807	38389758	0	0	0	23723084	4377000	0	0	0	6184689
4808	10738366	0	0	0	17446624	53219610	0	0	0	57004098
4809	51995155	0	0	0	65363742	77949454	0	0	0	68441017
4810	2664219795	0	0	0	2004708235	334403978	0	0	0	324052568
4811	931776350	0	0	0	533453320	169870461	0	0	0	448643551
4812	496370	0	0	0	1430669	1192451	0	0	0	4708409
4813	8487101	0	0	0	48474473	12205684	0	0	0	56210308
4814	15621566	0	0	0	62415049	28702338	0	0	0	118084329
4815	86103	0	0	0	170688	222665	0	0	0	1099930
4816	25521288	0	0	0	34945725	23297116	0	0	0	28898719
4817	89509969	0	0	0	176506267	7874234	0	0	0	34132219
4818	272404363	0	0	0	583618756	166637260	0	0	0	448685846
4819	224141550	0	0	0	410028099	200074861	0	0	0	305003658
4820	79875895	0	0	0	207473816	17325070	0	0	0	87757141
4821	190789079	0	0	0	117933458	17411565	0	0	0	141121082
4822	4968560	0	0	0	6229445	5551623	0	0	0	8188855
4823	217225378	0	0	0	353329740	92130221	0	0	0	244744901
4901	218005831	0	0	0	1252867570	212018049	0	0	0	1787855734
4902	156692620	0	0	0	313664369	72508301	0	0	0	755219547
4903	12291645	0	0	0	34930534	4437643	0	0	0	30614826
4904	522960	0	0	0	9539850	1658987	0	0	0	20653505
4905	2057593	0	0	0	13763459	1182715	0	0	0	36774643
4906	2192123	0	0	0	2774876	174122	0	0	0	6505739
4907	4717622	0	0	0	99250970	6005831	0	0	0	62697535
4908	74746680	0	0	0	36899249	13275803	0	0	0	64449081
4909	22779595	0	0	0	85389796	19329084	0	0	0	97347303
4910	4709252	0	0	0	24094063	1055649	0	0	0	6177510
4911	245180682	0	0	0	494039819	41836308	0	0	0	209984877
5001	2513	0	0	0	8372	1686	0	0	0	55527
5002	71138	0	0	0	1281010	3139	0	0	0	39966
5003	221167	0	0	0	1617882	152503	0	0	0	1285167
5004	149257	0	0	0	5854969	39973	0	0	0	664967
5005	49656	0	0	0	1403185	64992	0	0	0	139608
5006	38856	0	0	0	921565	11662	0	0	0	314901
5007	935548	0	0	0	51647522	368186	0	0	0	34114370
5101	63121249	0	0	0	101275467	40242754	0	0	0	79914580
5102	4232294	0	0	0	92889892	1003452	0	0	0	30209579
5103	5530762	0	0	0	6939860	7829777	0	0	0	12654785
5104	64152	0	0	0	87203	34471	0	0	0	53580
5105	9123044	0	0	0	48327777	6265961	0	0	0	38603777
5106	6585993	0	0	0	35176178	6565440	0	0	0	47275872
5107	8718303	0	0	0	80486552	2878506	0	0	0	32018667
5108	317304	0	0	0	12230692	388903	0	0	0	20311365
5109	420955	0	0	0	3017480	2027687	0	0	0	11815396
5110	62335	0	0	0	337457	19119	0	0	0	174595
5111	3595028	0	0	0	52185253	3532475	0	0	0	84900537
5112	1969828	0	0	0	51344494	3531434	0	0	0	131262111
5113	52361	0	0	0	393203	34886	0	0	0	1123003
5201	19322169	0	0	0	24304914	94139	0	0	0	1318457
5202	21327094	0	0	0	10428339	1002009	0	0	0	927527
5203	7649690	0	0	0	13580519	496634	0	0	0	1147656
5204	689101	0	0	0	4030127	423569	0	0	0	4678692
5205	35025229	0	0	0	109853049	17135640	0	0	0	44395347
5206	5879362	0	0	0	15939960	311768	0	0	0	2193853
5207	2090368	0	0	0	6110352	868039	0	0	0	9059172
5208	36852615	0	0	0	220076058	10200259	0	0	0	134147405
5209	38234240	0	0	0	190793071	5683110	0	0	0	83593494
5210	11060664	0	0	0	60426430	2640328	0	0	0	27572536
5211	9981007	0	0	0	101080472	3040517	0	0	0	37053380
5212	1583038	0	0	0	18012464	416585	0	0	0	8326979
5301	2768924	0	0	0	9498805	174041	0	0	0	121374
5302	59407	0	0	0	160741	832055	0	0	0	493930
5303	4012346	0	0	0	2379757	20413	0	0	0	287385
5304	443144	0	0	0	499286	33919	0	0	0	45695
5305	20279809	0	0	0	15559915	82861	0	0	0	333224
5306	2504048	0	0	0	21400975	2026264	0	0	0	22953399
5307	4624972	0	0	0	5099992	533575	0	0	0	909934
5308	620417	0	0	0	700293	106774	0	0	0	551146
5309	4134495	0	0	0	58790057	3650371	0	0	0	85123956
5310	15796600	0	0	0	14632994	3100906	0	0	0	3888102
5311	123602	0	0	0	1946337	438596	0	0	0	3534172
5401	2328899	0	0	0	17878787	3017880	0	0	0	35100725
5402	254017969	0	0	0	523828186	68888677	0	0	0	177416296
5403	4981176	0	0	0	19402726	1094351	0	0	0	5144783
5404	6819240	0	0	0	41559282	7048687	0	0	0	30769498
5405	17935	0	0	0	115200	103933	0	0	0	320396
5406	605908	0	0	0	2950110	110955	0	0	0	750498
5407	83291286	0	0	0	516133739	43069559	0	0	0	334880284
5408	6119370	0	0	0	92376751	1723557	0	0	0	26052376
5501	2877251	0	0	0	5359259	1258878	0	0	0	2240966
5502	5179545	0	0	0	22221847	305329	0	0	0	356734
5503	158128310	0	0	0	206311070	43936319	0	0	0	56635128
5504	8662724	0	0	0	14861655	939900	0	0	0	1032860
5505	12243391	0	0	0	9547083	16714485	0	0	0	14760183
5506	5681531	0	0	0	11811075	7715051	0	0	0	17849035
5507	195534	0	0	0	378821	1835	0	0	0	6759
5508	1533632	0	0	0	9643026	848084	0	0	0	4440339
5509	33813897	0	0	0	119092595	3690837	0	0	0	21364845
5510	8166543	0	0	0	24070870	113071	0	0	0	790403
5511	1197892	0	0	0	5101312	586851	0	0	0	6522596
5512	3494753	0	0	0	37953797	422714700	0	0	0	28351804
5513	28395917	0	0	0	101662729	5083272	0	0	0	26276419
5514	17471387	0	0	0	63642824	6893942	0	0	0	56271120
5515	8477190	0	0	0	85458637	15386637	0	0	0	142847599
5516	18889247	0	0	0	151074614	5002775	0	0	0	73922231
5601	26737466	0	0	0	55714840	14789592	0	0	0	105579412
5602	18593070	0	0	0	39007035	12991841	0	0	0	51754093
5603	220056241	0	0	0	296694850	31976532	0	0	0	117181741
5604	1746073	0	0	0	12256504	858452	0	0	0	10598848
5605	164588	0	0	0	2922282	156858	0	0	0	4458557
5606	1206099	0	0	0	11638182	83286	0	0	0	947527
5607	15180837	0	0	0	30382188	4742945	0	0	0	26710235
5608	5983015	0	0	0	20331004	1324144	0	0	0	14567275
5609	759566	0	0	0	4367511	436736	0	0	0	4202296
5701	5720672	2039357	0	0	68387872	1316594	593174	0	0	29498771
5702	86879728	38884048	0	0	210359155	7293365	3950373	0	0	102200041
5703	282665431	145255416	0	0	724856931	30849420	13021240	0	0	135623269
5704	20967292	17372564	0	0	36104975	3539076	1402315	0	0	8840995
5705	6109799	5004059	0	0	22119512	9655769	3614513	0	0	43824314
5801	14902679	0	0	0	160039638	2727700	0	0	0	41568274
5802	906023	0	0	0	5954291	211870	0	0	0	2054848
5803	261271	0	0	0	1180075	66641	0	0	0	2179155
5804	796399	0	0	0	12559409	348029	0	0	0	13017055
5805	56510	0	0	0	5446591	55079	0	0	0	2899639
5806	7204675	0	0	0	45414324	5531432	0	0	0	63525468
5807	894697	0	0	0	14955927	1545385	0	0	0	50922587
5808	52003310	0	0	0	31084127	622044	0	0	0	21769841
5809	143158	0	0	0	1005330	45142	0	0	0	674828
5810	2700499	0	0	0	77885947	826550	0	0	0	16451291
5811	198566406	0	0	0	3981565	352030	0	0	0	2767906
5901	1864301	0	0	0	7276098	930793	0	0	0	9575724
5902	9593816	0	0	0	37628308	1837588	0	0	0	12312087
5903	12747705	0	0	0	89732771	21211223	0	0	0	237929322
5904	3249321	1193544	0	0	6286694	7910080	3995640	0	0	16509769
5905	259501	0	0	0	2422942	175375	0	0	0	3808231
5906	5507955	0	0	0	22002391	9350239	0	0	0	37904258
5907	2978251	0	0	0	25963333	2283585	0	0	0	16397953
5908	149599	0	0	0	733777	100774	0	0	0	1007017
5909	441147	0	0	0	3806428	1343291	0	0	0	14322146
5910	824571	0	0	0	7202188	1532604	0	0	0	13578799
5911	3750487	0	0	0	79126786	6151567	0	0	0	141880883
6001	8059952	0	0	0	44126408	4848923	0	0	0	32718375
6002	5895978	0	0	0	50031710	3292851	0	0	0	39694161
6003	550469	0	0	0	5325419	357471	0	0	0	10571506
6004	2547766	0	0	0	48880587	1438329	0	0	0	22219599
6005	7057513	0	0	0	42845459	12517826	0	0	0	60216294
6006	5168209	0	0	0	40240606	3514648	0	0	0	35851182
6101	4299664	0	11581095	0	76353682	543178	0	974457	0	21436309
6102	12116984	0	20745424	0	187511592	1175562	0	1721395	0	27402296
6103	115810733	0	42968775	0	198542242	1461937	0	2802164	0	38491339
6104	33183181	0	95676148	0	586514744	3387596	0	8509933	0	109165793
6105	26515017	0	82654847	0	394638010	3030195	0	9967889	0	74474991
6106	14016174	0	57840362	0	278471976	3363234	0	13189461	0	97984972
6107	42574888	0	151540480	0	237646100	1306608	0	10195729	0	28156929
6108	59555966	0	380234728	0	568360948	1658775	0	18181118	0	54636197
6109	108428401	0	478984836	0	1768104854	14639809	0	87868362	0	286819444
6110	155176071	0	314446166	0	2356930142	79865230	0	46340206	0	499561146
6111	20902278	0	0	0	359529480	14626843	0	0	0	52232221
6112	5857050	0	31835748	0	153594539	1012479	0	67454314	0	79499299
6113	834446	0	0	0	17429965	107711	0	0	0	5018316
6114	3688889	0	0	0	79873081	693608	0	0	0	21626206
6115	37385488	0	0	0	464743067	3135275	0	0	0	74261664
6116	9777424	0	0	0	88997370	851957	0	0	0	15166969
6117	2752625	0	0	0	44072580	12333590	0	0	0	87997187
6201	19611741	0	24001893	0	361693065	3434349	0	3443563	0	115651001
6202	24560436	0	34249072	0	480482098	2341749	0	3402562	0	106865651
6203	92401605	0	172545393	0	1727948327	69654169	0	72015264	0	212405509
6204	133300678	0	333393149	0	2971322498	23041683	0	32664062	0	416235429
6205	42963493	0	261080092	0	833138933	6970264	0	136712381	0	114141239
6206	37287477	0	119347778	0	777013524	7719265	0	17130326	0	172506279
6207	6290858	0	0	0	84094502	570577	0	0	0	15142419
6208	11849922	0	0	0	200646750	695388	0	0	0	27175044
6209	8423312	0	0	0	165220652	1713713	0	0	0	21791761
6210	14463374	0	0	0	278064707	5924563	0	0	0	134755733
6211	14775867	0	0	0	326138037	2598384	0	0	0	62880439
6212	13069869	0	0	0	508525560	2016454	0	0	0	100961534
6213	547744	0	0	0	6078148	36811	0	0	0	1288138
6214	7953778	0	27667198	0	94994798	1302979	0	71291381	0	91631820
6215	1453469	0	0	0	65103640	288964	0	0	0	27899684
6216	1794701	0	0	0	18266959	279002	0	0	0	4892749
6217	3792689	0	0	0	39362304	22407424	0	0	0	369164736
6301	7967658	0	0	0	45286099	1514402	0	0	0	21305187
6302	115113193	0	0	0	748073567	9710288	0	0	0	89098422
6303	28417086	0	0	0	202928698	1806452	0	0	0	26461176
6304	15791987	0	0	0	101494814	914127	0	0	0	13176200
6305	27211827	0	0	0	55909973	3763244	0	0	0	14543447
6306	22712453	0	0	0	93156274	1616141	0	0	0	20862453
6307	32098338	0	0	0	146528203	7928379	0	0	0	127627118
6308	249050	0	0	0	3750598	108852	0	0	0	2538149
6309	6112349	0	0	0	6225412	147465098	0	0	0	135748301
6310	17083219	0	0	0	10791962	6391599	0	0	0	5508734
6401	6783719	0	0	0	27006007	1058277	0	0	0	10253355
6402	49934647	0	0	0	511344849	2566090	0	0	0	52185611
6403	143762768	0	0	0	2543168181	17853271	0	0	0	499752349
6404	38555084	0	0	0	491254036	3013506	0	0	0	70754313
6405	12921457	0	0	0	145761873	1247500	0	0	0	23061899
6406	8013348	0	0	0	145661752	1755174	0	0	0	22700658
6501	40197	0	0	0	781708	9665	0	0	0	519575
6502	18715	0	0	0	462041	3839	0	0	0	80045
6503	180542	0	502286	0	2881291	36909	0	65489495	0	1389816
6504	485745	0	0	0	8260374	87758	0	0	0	4052938
6505	9370669	0	0	0	140875224	1736647	0	0	0	39111699
6506	4564776	0	0	0	81031486	2577371	0	0	0	35061421
6507	339861	0	0	0	4427142	520674	0	0	0	1975463
6601	14114486	0	20203760	0	53015010	959100	0	1748762	0	11321693
6602	240953	0	3859351	0	3036010	126115	0	842525	0	1731144
6603	1153396	0	0	0	1986008	8526738	0	0	0	16740916
6701	120482	0	0	0	2342691	31111	0	0	0	210323
6702	7603013	0	0	0	50509373	769504	0	0	0	9093940
6703	198979	0	0	0	6711263	49981	0	0	0	2830767
6704	1240095	0	0	0	23303989	146280	0	0	0	5723084
6801	76770296	0	0	0	16477838	5925949	0	0	0	1826121
6802	143004448	0	0	0	122136043	8008196	0	0	0	9022276
6803	144559065	0	0	0	66672725	10130557	0	0	0	10109270
6804	25456804	0	0	0	76656534	3613447	0	0	0	32773535
6805	24875359	0	0	0	89929981	18235049	0	0	0	135688258
6806	130559048	0	0	0	82963248	63608650	0	0	0	98047658
6807	43891464	0	0	0	30963199	74987227	0	0	0	29220662
6808	11271351	0	0	0	4697732	32729450	0	0	0	24485080
6809	116956248	0	0	0	24814255	119590050	0	0	0	29780234
6810	114219300	0	0	0	43751958	835496390	0	0	0	136204772
6811	61384270	0	0	0	28517696	26875205	0	0	0	13042751
6812	188672	0	0	0	1789993	774375	0	0	0	8245387
6813	10814054	0	0	0	60059668	4001664	0	0	0	34100631
6814	567375	0	0	0	5391351	388146	0	0	0	3552351
6815	18259597	0	0	0	115250510	29027660	0	0	0	129337878
6901	35977978	0	0	0	12512526	13743428	0	0	0	4414208
6902	122398443	0	0	0	50876685	91527876	0	0	0	70846023
6903	5860867	0	0	0	23926620	38579284	0	0	0	131654625
6904	219411733	0	0	0	25276741	45163590	0	0	0	11247699
6905	24529648	0	0	0	8300368	11920005	0	0	0	4721524
6906	4465491	0	0	0	1901315	41831449	0	0	0	16346381
6907	51936426	3517887	0	0	41531106	4007919	531686	0	0	3812424
6908	627659762	54609598	0	0	396162904	19200919	2785966	0	0	24684714
6909	7887001	0	0	0	29431681	1017408	0	0	0	15045646
6910	74221292	0	0	0	140536047	18183209	0	0	0	47531674
6911	27396979	0	0	0	82394288	69459727	0	0	0	150833766
6912	74977063	0	0	0	140208750	33949126	0	0	0	174500453
6913	109782587	0	0	0	120536737	5848270	0	0	0	34164147
6914	59434497	0	0	0	46810827	3018724	0	0	0	19528889
7001	51855188	0	0	0	6460364	23555807	0	0	0	9625449
7002	15298337	0	0	0	26821901	2379825	0	0	0	6531837
7003	7793786	0	0	0	6790875	5021681	0	0	0	3829902
7004	10180876	2223972	0	0	5466674	3089655	970401	0	0	11573077
7005	266953588	32258275	0	0	119831625	115935479	10970578	0	0	47499489
7006	7976970	0	0	0	14934751	653029	0	0	0	6932767
7007	131204097	0	0	0	324628625	32504597	0	0	0	124750124
7008	5665716	0	0	0	23866620	2478698	0	0	0	7053798
7009	52600507	0	0	0	140751735	14533351	0	0	0	84877823
7010	1537162429	0	0	0	150732994	136325719	0	0	0	89429470
7011	147604355	0	0	0	157714868	74948350	0	0	0	113431191
7012	279150	0	0	0	1009854	13616	0	0	0	192271
7013	131969470	0	0	0	312739232	15265785	0	0	0	64407283
7014	751880	0	0	0	6006885	10969614	0	0	0	2206320
7015	306414	0	0	0	3108248	62263	0	0	0	466069
7016	11962066	0	0	0	20836869	517190	0	0	0	3788797
7017	3172874	0	0	0	30874871	9488577	0	0	0	63987505
7018	9186300	0	0	0	22170942	12880264	0	0	0	11279562
7019	91463560	0	0	0	214834213	118361604	0	0	0	311486447
7020	4516397	0	0	0	23856001	12153401	0	0	0	42730526
7101	6664	0	0	0	43072502	4333	0	0	0	33167390
7102	32414	0	0	0	6121337602	40728	0	0	0	6768992421
7103	545684	0	0	0	118275589	28534	0	0	0	86410418
7104	13676	0	0	0	6023009	16017	0	0	0	759612
7105	22645	0	0	0	16183389	99234	0	0	0	18195479
7106	4515484	0	0	0	644214063	1621026	0	0	0	232216775
7107	54318	0	0	0	3638454	38968	0	0	0	739673
7108	1147656	0	0	0	5981310520	161968	0	0	0	1208961737
7109	13753	0	0	0	1186101	56846	0	0	0	4144122
7110	37315	0	0	0	334932083	95659	0	0	0	966517392
7111	3163	0	0	0	5410933	8163	0	0	0	466046
7112	5248347	0	0	0	848359273	5440877	0	0	0	69302718
7113	620270	0	0	0	2264561376	550188	0	0	0	1408203883
7114	159933	0	0	0	21406799	55538	0	0	0	37800976
7115	74306	0	0	0	30463536	22458	0	0	0	79024556
7116	80881	0	0	0	9549368	2426	0	0	0	5767384
7117	4909654	0	0	0	181483376	1641356	0	0	0	82890890
7118	331391	0	0	0	5861219	3337612	0	0	0	24414972
7201	127286725	0	0	0	18453728	3365323	0	0	0	3207896
7202	399119094	0	0	0	214712173	43298846	0	0	0	134644272
7203	856590	0	0	0	979229	1191791	0	0	0	1618849
7204	116461289	0	0	0	70673925	5579141779	0	0	0	709460011
7205	41177507	0	0	0	29308691	65661670	0	0	0	41132530
7206	923927	0	0	0	1077697	974390	0	0	0	564997
7207	1384773879	0	0	0	309003710	198784606	0	0	0	70917244
7208	1107382858	0	0	0	370110942	749673818	0	0	0	231518468
7209	520076730	0	0	0	184038151	160852182	0	0	0	55962204
7210	1654040178	0	0	0	831146223	844508206	0	0	0	482807352
7211	114046971	0	0	0	59032658	135261846	0	0	0	77075030
7212	102245502	0	0	0	69896961	81999070	0	0	0	91188076
7213	324646574	0	0	0	91672244	794656165	0	0	0	240707467
7214	575909442	0	0	0	161917263	492319442	0	0	0	161497331
7215	66584162	0	0	0	38103628	119608776	0	0	0	72785768
7216	636065858	0	0	0	234709035	821539935	0	0	0	275449358
7217	86416978	0	0	0	65916032	154111923	0	0	0	94171769
7218	44098495	0	0	0	60568560	316897202	0	0	0	331187024
7219	360230165	0	0	0	381430724	169298035	0	0	0	266527036
7220	45967022	0	0	0	73371124	32758702	0	0	0	73186490
7221	3965712	0	0	0	6415082	26650934	0	0	0	41783675
7222	51567483	0	0	0	110298048	38368433	0	0	0	65357990
7223	11373131	0	0	0	32958872	5587321	0	0	0	17539432
7224	15821207	0	0	0	10232789	42619294	0	0	0	31135011
7225	407667247	0	0	0	180963447	69297633	0	0	0	54674569
7226	46054881	0	0	0	28969257	54415332	0	0	0	57727692
7227	48804851	0	0	0	26773663	18462437	0	0	0	7442484
7228	162571683	0	0	0	127943220	187113544	0	0	0	142211010
7229	17377123	0	0	0	18482709	13719488	0	0	0	21767775
7301	46038659	0	0	0	28342002	81959172	0	0	0	50208549
7302	194977165	0	0	0	96934323	43364896	0	0	0	49994634
7303	25272012	0	0	0	24820147	39834123	0	0	0	38417273
7304	261591023	0	0	0	360821997	456433902	0	0	0	476080842
7305	51751629	0	0	0	39218175	162931327	0	0	0	110358627
7306	434208313	0	0	0	311014622	331425158	0	0	0	265083849
7307	63024654	0	0	0	235613588	46242346	0	0	0	310147801
7308	277904173	0	0	0	377725975	254296940	0	0	0	455956175
7309	7500819	0	0	0	28922721	18667139	0	0	0	57136482
7310	210597202	0	0	0	126523404	40269672	0	0	0	106787662
7311	16304708	0	0	0	52487829	15400803	0	0	0	52197047
7312	55279212	0	0	0	89100237	47411633	0	0	0	111813676
7313	3065877	0	0	0	3010218	3920964	0	0	0	7435573
7314	65469214	0	0	0	67520867	56641189	0	0	0	68502084
7315	19917357	0	0	0	73892377	17720940	0	0	0	78636599
7316	3003535	0	0	0	7542816	1739341	0	0	0	9434306
7317	44210871	0	0	0	54309934	14172296	0	0	0	22979835
7318	2149173225	0	0	0	627068655	38578019	0	0	0	299220379
7319	800560	0	0	0	7425212	321144	0	0	0	6088945
7320	38727973	0	0	0	96537904	24946400	0	0	0	87502864
7321	72294685	0	0	0	266902947	10278709	0	0	0	52147236
7322	115385110	0	0	0	226255918	13364053	0	0	0	38552490
7323	79201122	0	0	0	325506059	6424029	0	0	0	39684064
7324	26808184	0	0	0	103696367	3389874	0	0	0	31950798
7325	111050410	0	0	0	108364877	96991103	0	0	0	165853290
7326	192110539	0	0	0	604963636	130362068	0	0	0	479327804
7401	26299	0	0	0	169833	10723507	0	0	0	5865704
7402	92705	0	0	0	270564	259129	0	0	0	2933850
7403	323667008	0	0	0	509182753	55939213	0	0	0	84789397
7404	19513714	0	0	0	24938186	166277519	0	0	0	185944660
7405	1095914	0	0	0	2543659	3990805	0	0	0	9060521
7406	2346929	0	0	0	8440761	6611285	0	0	0	26897095
7407	24530509	0	0	0	61371662	17608589	0	0	0	44479385
7408	86192382	0	0	0	189412495	68107522	0	0	0	117889308
7409	49705483	0	0	0	120978023	16016966	0	0	0	56661821
7410	7849691	0	0	0	42887178	2838110	0	0	0	28712706
7411	51976333	0	0	0	157410152	24446172	0	0	0	67538672
7412	11523244	0	0	0	63003147	8039745	0	0	0	74354169
7413	6009244	0	0	0	27573633	4563791	0	0	0	18829144
7414	442797	0	0	0	2188959	260578	0	0	0	5839055
7415	4744520	0	0	0	15253915	1436159	0	0	0	16017687
7416	97545	0	0	0	1159133	27521	0	0	0	522631
7417	193477	0	0	0	851898	330212	0	0	0	3165178
7418	5182102	0	0	0	50209361	1155566	0	0	0	17217336
7419	5047082	0	0	0	38641360	6141264	0	0	0	60296788
7501	52555873	0	0	0	184737981	121649	0	0	0	653962
7502	49397438	0	0	0	218977927	23922286	0	0	0	180001301
7503	25607333	0	0	0	43644799	7564391	0	0	0	22627485
7504	921929	0	0	0	14970927	8251693	0	0	0	88010927
7505	8057632	0	0	0	94357087	5634581	0	0	0	91070721
7506	4138992	0	0	0	48563753	2365022	0	0	0	42276972
7507	1101948	0	0	0	10988438	2213899	0	0	0	38757801
7508	1145502	0	0	0	18511646	775061	0	0	0	11425896
7601	520584365	0	0	0	639963433	250440470	0	0	0	372669550
7602	121709735	0	0	0	97064306	244763176	0	0	0	251074701
7603	6029307	0	0	0	18583789	9967378	0	0	0	26288414
7604	82376877	0	0	0	253879894	35800257	0	0	0	126586418
7605	14115662	0	0	0	27114316	10537774	0	0	0	55596674
7606	373362384	0	0	0	865590615	209340568	0	0	0	493143822
7607	68099641	0	0	0	249214718	39365893	0	0	0	155440635
7608	14477070	0	0	0	56128080	5078178	0	0	0	30585773
7609	2205732	0	0	0	18419507	1133180	0	0	0	17809961
7610	35258559	0	0	0	282007978	11709171	0	0	0	110301103
7611	858219	0	0	0	10652574	1688144	0	0	0	11998724
7612	15369839	0	0	0	104121126	25505280	0	0	0	127323467
7613	1609504	0	0	0	13156706	8437944	0	0	0	60957488
7614	4923923	0	0	0	8376290	648540	0	0	0	1453877
7615	13565253	0	0	0	91632204	1986467	0	0	0	17057697
7616	48185278	0	0	0	218616852	25758280	0	0	0	257629581
7801	216251506	0	0	0	154765673	160639248	0	0	0	91236273
7802	5014847	0	0	0	2455083	12410162	0	0	0	4597865
7803	589685	0	0	0	1855967	148741	0	0	0	564883
7804	20591605	0	0	0	17127444	111567	0	0	0	862082
7805	3839	0	0	0	32541	41777	0	0	0	215074
7806	981528	0	0	0	3774724	1591439	0	0	0	3419139
7901	114778976	0	0	0	100679682	38193607	0	0	0	36553394
7902	262481	0	0	0	201403	15461757	0	0	0	11431907
7903	558476	0	0	0	796950	3836316	0	0	0	4400850
7904	492256	0	0	0	827778	1283947	0	0	0	2292091
7905	2027304	0	0	0	4292271	162756	0	0	0	974628
7906	12653	0	0	0	99699	115029	0	0	0	3981319
7907	2338907	0	0	0	11355868	4900696	0	0	0	17695663
8001	9121906	0	0	0	36017831	2434824	0	0	0	8895358
8002	198366	0	0	0	304273	2581424	0	0	0	3018467
8003	499436	0	0	0	2251478	205921	0	0	0	1039942
8004	935319	0	0	0	1070358	17028	0	0	0	95309
8005	405195	0	0	0	4936420	463119	0	0	0	2663364
8006	1965	0	0	0	15568	13875	0	0	0	216011
8007	1180869	0	0	0	9012720	1403444	0	0	0	7996264
8101	2163976	0	0	0	21480206	1683064	0	0	0	10431887
8102	1263233	0	0	0	19661308	326012	0	0	0	3938278
8103	3486234	0	0	0	158887896	273194	0	0	0	118875489
8104	17528557	0	0	0	35431045	8568467	0	0	0	33334758
8105	4258318	0	0	0	59684666	1078636	0	0	0	32166582
8106	1506750	0	0	0	8799246	1438588	0	0	0	9847362
8107	233890	0	0	0	594981	282097	0	0	0	1211101
8108	30779362	0	0	0	219828830	11393292	0	0	0	150003859
8109	428596	0	0	0	6790734	266081	0	0	0	2953160
8110	177849	0	0	0	439938	252166	0	0	0	649159
8111	10650777	0	0	0	12770486	0	0	0	0	0
8112	1718652	0	0	0	21076472	5709014	0	0	0	30785910
8113	218833	0	0	0	2253716	5492034	0	0	0	8497945
8201	17717480	0	0	0	53788429	5425915	0	0	0	25256624
8202	12629321	0	0	0	97622403	4642580	0	0	0	67394937
8203	16499043	0	0	0	55025771	3048157	0	0	0	22314503
8204	11450696	0	0	0	69263706	2567133	0	0	0	25502156
8205	131987969	0	0	0	235701227	16094787	0	0	0	139890746
8206	7034026	0	0	0	28202751	3327815	0	0	0	14544229
8207	50216974	0	0	0	441578444	21251005	0	0	0	519885361
8208	92579251	0	0	0	40165918	1774389	0	0	0	45849710
8209	896577	0	0	0	109809994	919314	0	0	0	53020598
8210	2417174	0	0	0	13299481	523706	0	0	0	8566504
8211	10696649	0	0	0	60603289	6222175	0	0	0	22918025
8212	316405308	0	0	0	375088908	24199536	0	0	0	835883645
8213	2342743	0	0	0	17188157	155426	0	0	0	3006867
8214	2630843	0	0	0	22473265	503689	0	0	0	8600027
8215	17475492	0	0	0	99430328	2394167	0	0	0	24112718
8301	22174501	0	0	0	264165473	6272327	0	0	0	81911116
8302	209701184	0	0	0	749858059	41060537	0	0	0	297663426
8303	21509208	0	0	0	42369105	2639828	0	0	0	9881686
8304	2424638	0	0	0	11964345	1703768	0	0	0	10193931
8305	10953443	0	0	0	24550198	3190293	0	0	0	9868958
8306	16905483	0	0	0	79570798	1675020	0	0	0	17010427
8307	6977574	0	0	0	52847789	2803025	0	0	0	34404505
8308	11368991	0	0	0	50917698	8459639	0	0	0	93250478
8309	52377454	0	0	0	187760694	23366712	0	0	0	111362505
8310	2161667	0	0	0	17396651	409050	0	0	0	9407360
8311	18998588	0	0	0	43704870	20357727	0	0	0	56837300
8401	769236	0	0	0	26777041	221245	0	0	0	9443458
8402	2776541	0	0	0	21715498	9161442	0	0	0	55643023
8403	48073795	0	0	0	413298598	7197161	0	0	0	58299430
8404	2842202	0	0	0	16653549	5526106	0	0	0	45428705
8405	3960181	0	0	0	26927713	2271837	0	0	0	29194238
8406	5117818	0	0	0	98418273	10525902	0	0	0	239322814
8407	63233991	0	815248	0	809153000	177673343	0	1508482	0	2309696886
8408	166785529	0	14212518	0	1268841532	90384602	0	2151454	0	1030123466
8409	363274924	0	0	0	1608124495	99557323	0	0	0	1062190591
8410	210820	0	0	0	6394969	311252	0	0	0	10609961
8411	19505416	0	0	0	6902955957	27470716	0	0	0	10584225369
8412	23973031	0	0	0	249756800	20940528	0	0	0	271588906
8413	465017213	0	0	0	1101412609	45454891	0	0	0	983163349
8414	107350145	0	0	0	1156451161	63161002	0	0	0	1203192116
8415	86161956	0	0	0	619822978	29656210	0	0	0	422832054
8416	3338778	0	0	0	52554013	3977335	0	0	0	64098780
8417	3864019	0	0	0	41448744	6073122	0	0	0	61132913
8418	563245649	0	0	0	1140192041	37383064	0	0	0	270251186
8419	103467706	0	0	0	501663775	34629815	0	0	0	561932856
8420	5885203	0	0	0	18083716	7933622	0	0	0	31885968
8421	89523535	0	0	0	963393013	105448193	0	0	0	1138314267
8422	404005200	0	0	0	759523547	13866710	0	0	0	252812938
8423	9935763	0	0	0	112466469	3124786	0	0	0	123031802
8424	41036078	0	0	0	345426948	22435206	0	0	0	293136287
8425	19202384	0	3313291	0	122890407	8697207	0	587386	0	91293167
8426	28376222	0	0	0	154861981	15987333	0	0	0	89669645
8427	86530450	0	157789	0	435414052	297262776	0	50097	0	772823279
8428	55518089	0	0	0	449361158	29170898	0	0	0	343920040
8429	183189779	0	414421	0	842427318	516525411	0	164069	0	1351341888
8430	10341168	0	0	0	143139481	9504391	0	0	0	94492481
8431	304893104	0	0	0	1295938114	177204910	0	0	0	1349231333
8432	30380625	0	0	0	169725765	15251332	0	0	0	70228120
8433	74261360	0	0	0	439327097	28285262	0	0	0	195622727
8434	3787014	0	0	0	46335033	3174745	0	0	0	31844607
8435	568601	0	0	0	17141833	178094	0	0	0	3336693
8436	14782393	0	0	0	86546153	4583609	0	0	0	31885748
8437	844848	0	0	0	10348491	1944057	0	0	0	36839282
8438	12715781	0	0	0	273191860	10923561	0	0	0	187255019
8439	5341134	0	0	0	68683086	12192563	0	0	0	86589396
8440	4973669	0	0	0	85405950	3950364	0	0	0	51076601
8441	36728058	0	0	0	169970448	7880416	0	0	0	149109703
8442	3353857	0	0	0	102437642	6527150	0	0	0	162616704
8443	32287516	0	0	0	615162097	28043747	0	0	0	600307910
8444	336123	0	1502	0	5443336	2341887	0	2924	0	14759791
8445	879309	0	6455	0	12347933	5577435	0	13583	0	34108881
8446	498846	0	11943	0	8105831	1768226	0	759	0	7140092
8447	1293507	0	14279	0	29734755	5413614	0	19080	0	46392672
8448	2274048	0	0	0	55315880	5548675	0	0	0	105624583
8449	198880	0	0	0	5328116	310102	0	0	0	2350797
8450	316274358	0	0	0	499695877	11587826	0	0	0	48978498
8451	14318614	0	0	0	104385458	22921060	0	0	0	114105776
8452	5966195	0	0	0	67989476	3511354	0	0	0	39839670
8453	937265	0	0	0	10113146	1312048	0	0	0	9240063
8454	8504640	0	0	0	46242216	8914450	0	0	0	48675273
8455	5972053	0	0	0	24468404	34247867	0	0	0	108827930
8456	2492268	0	2897	0	111910701	1289879	0	897	0	79575194
8457	7409735	0	1636	0	102884279	11064480	0	3338	0	145235234
8458	9216300	0	13255	0	119808404	7992319	0	12638	0	70741030
8459	8083766	0	154481	0	87399076	8184352	0	19155	0	43407577
8460	3745627	0	637556	0	75539185	4506870	0	14267	0	86915101
8461	3965237	0	168957	0	45931976	3383754	0	6651	0	29912447
8462	13916940	0	37720	0	172915063	13059069	0	40513	0	98645761
8463	1140337	0	8863	0	18242111	2243539	0	3259	0	21345224
8464	2918748	0	0	0	48407316	968251	0	0	0	14875968
8465	21571590	0	1361897	0	207865830	4370252	0	32485	0	39112694
8466	32615205	0	0	0	412073407	19288755	0	0	0	386088792
8467	92741392	0	0	0	739328477	31204549	0	0	0	476958567
8468	2161935	0	0	0	34057097	1310248	0	0	0	19633649
8469	92155	0	18496	0	2924746	795267	0	126271	0	11948256
8470	151711172	0	22542095	0	159005226	1289011	0	2069728	0	62568464
8471	303443373	0	177514247	0	15369583847	187806204	0	1242242798	0	9440629223
8472	14071687	0	4017762	0	165617659	20461345	0	323784	0	464950782
8473	185269514	0	0	0	8214527612	55144738	0	0	0	6507468707
8474	51446111	0	0	0	201864986	83426745	0	0	0	545380028
8475	1874137	0	0	0	64664404	3745566	0	0	0	82907035
8476	9898994	0	0	0	122050221	2852937	0	0	0	104524298
8477	22056609	0	0	0	347203319	20847866	0	0	0	233146066
8478	1381760	0	0	0	61096485	3941207	0	0	0	143858699
8479	57177332	0	0	0	952434261	55415641	0	0	0	1145054475
8480	12322545	0	0	0	175604817	6999334	0	0	0	100409477
8481	153781401	0	0	0	1462104843	55041665	0	0	0	1175021998
8482	57198386	0	0	0	496871962	24223957	0	0	0	392949984
8483	150272096	0	0	0	848658171	61690628	0	0	0	586729553
8484	21744951	0	0	0	138573225	4666894	0	0	0	178361429
8485	13109579	0	0	0	215441868	11272234	0	0	0	400546251
8501	78368888	0	58975796	0	726223815	43685720	0	5525050	0	417067743
8502	12827525	0	3057321	0	138489881	81452966	0	339106	0	692197320
8503	25251128	0	0	0	164190389	39777701	0	0	0	289344008
8504	95516314	0	0	0	1273238294	39621564	0	0	0	980570018
8505	11813026	0	0	0	105121410	7728161	0	0	0	306073668
8506	122924036	0	0	0	235052241	14053605	0	0	0	154372445
8507	132110691	0	0	0	419127184	93057285	0	0	0	316000748
8509	74177399	0	0	0	484662075	14085133	0	0	0	133898204
8510	7050798	0	0	0	110584320	698019	0	0	0	16236676
8511	40229821	0	0	0	434638304	45688136	0	0	0	434077600
8512	24293509	0	0	0	300789582	16566081	0	0	0	177597043
8513	7338078	0	0	0	58664628	972062	0	0	0	17622095
8514	5215499	0	0	0	75410102	5987818	0	0	0	102484697
8515	11780671	0	0	0	248028335	6968242	0	0	0	149134207
8516	850245003	0	0	0	1499810248	95711684	0	0	0	619782676
8517	45570596	0	0	0	4278396387	28393414	0	0	0	3706295017
8518	72673154	0	0	0	684864375	33619163	0	0	0	586918778
8519	11003376	0	9317659	0	365402693	1958977	0	1524342	0	92866446
8520	14484120	0	5194113	0	250541963	755943	0	695035	0	47473330
8521	41996118	0	11015812	0	1026225522	9557936	0	2997096	0	245908893
8522	13222868	0	0	0	226335856	3087272	0	0	0	97629887
8523	71983241	0	1106023773	0	552496168	27107042	0	948068339	0	368018675
8524	125413431	0	0	0	2109082294	70476759	0	0	0	1697950423
8525	28432041	0	40484274	0	5587224017	43011624	0	315658045	0	12000663110
8526	2058494	0	0	0	323489655	821600	0	0	0	209086653
8527	85440758	0	33982030	0	1354674568	4207524	0	1468309	0	106512983
8528	179356103	0	18462907	0	2269669500	60473752	0	9158741	0	939925665
8529	39064114	0	0	0	1322439991	17558878	0	0	0	969637747
8530	1627834	0	0	0	27755676	1051928	0	0	0	59739608
8531	20923734	0	0	0	799391881	17243636	0	0	0	714711142
8532	8404842	0	0	0	347501306	4826851	0	0	0	382391122
8533	4791257	0	0	0	155873770	2696126	0	0	0	192186383
8534	7609380	0	0	0	598362857	3068713	0	0	0	593299167
8535	4703853	0	0	0	105364671	6043815	0	0	0	145955881
8536	122195702	0	0	0	1672799231	82170531	0	0	0	1413570821
8537	10068068	0	0	0	428601922	5716338	0	0	0	297320841
8538	20405173	0	0	0	342052513	8614918	0	0	0	482737732
8539	174598672	0	0	0	492642062	16216310	0	0	0	252723266
8540	74378628	0	0	0	682610969	157196592	0	0	0	823341668
8541	6408840	0	0	0	727574075	3612000	0	0	0	765826271
8542	8421341	0	0	0	5633054257	5633261	0	0	0	8559559903
8543	14814859	0	0	0	936614760	11501162	0	0	0	1357494807
8544	278564272	0	0	0	1630780594	179924238	0	0	0	764529524
8545	16821422	0	0	0	32441001	1277719	0	0	0	26627868
8546	8274788	0	0	0	59495899	5751916	0	0	0	93153624
8547	15649916	0	0	0	39053063	3421601	0	0	0	51574633
8548	20301706	0	0	0	109169017	3520957	0	0	0	142507984
8601	292213	0	18	0	3295443	463973	0	71	0	25246846
8602	2993333	0	0	0	55994634	162547	0	0	0	561432
8603	233341	0	2189	0	2420089	41888	0	98	0	228737
8604	1243491	0	660	0	10249765	152305	0	229	0	2735053
8605	5106461	0	1605	0	121810683	28507	0	2	0	9549
8606	3791361	0	0	0	13072896	54955	0	0	0	332262
8607	67197757	0	0	0	213864183	12213507	0	0	0	164917845
8608	18435774	0	0	0	45223414	4455948	0	0	0	19303958
8609	5388552	0	6969	0	11515388	11925410	0	16867	0	29996820
8701	102033746	0	64712	0	694783664	198646141	0	55947	0	1147433399
8702	15652683	0	3709	0	207297814	22037652	0	12326	0	203717242
8703	3220533957	0	2593770	0	32336944512	1489901735	0	1094440	0	16271688030
8704	446537571	0	226343	0	3551318873	310803791	0	138623	0	1959249247
8705	10225456	0	45746250	0	97940765	5549018	0	346	0	41044970
8706	95636283	0	23985	0	775795876	3437266	0	67133	0	30546113
8707	82574704	0	516322	0	199169650	10378172	0	2977293	0	71582326
8708	1892862012	0	0	0	10293470102	1041598944	0	0	0	6133174029
8709	2281783	0	0	0	18100124	1785281	0	0	0	17793993
8711	35409605	0	240869	0	739584346	4021137	0	18940	0	76901207
8712	38275069	0	3679924	0	175803467	3147529	0	225223	0	24023428
8713	6223830	0	579254	0	74118178	2272256	0	224618	0	42795235
8714	36708715	0	0	0	372824775	6509921	0	0	0	103496475
8715	15974536	0	0	0	96785729	1289280	0	0	0	11550001
8716	149971723	0	0	0	514784397	131241810	0	0	0	412827650
8802	0	0	0	0	0	372	0	1	0	6001632
8804	42397	0	0	0	6729243	19071	0	0	0	7405150
8901	3212580	0	0	0	21319337	2863950	0	0	0	5084268
8902	91180	0	7	0	1363102	27000	0	2	0	75020
8903	12306780	0	224815	0	198749005	18427039	0	19220	0	557784744
8904	0	0	0	0	0	8000	0	0	0	229854
8905	48612	0	15	0	2332944	39324	0	9	0	1201104
8906	461555	0	151	0	20407543	1013888	0	209	0	32540904
8907	2845354	0	0	0	13242933	4551829	0	0	0	62522172
9001	9723782	0	0	0	492422936	4064083	0	0	0	446309208
9002	1037231	0	0	0	125390324	478352	0	0	0	69434715
9003	1460983	0	0	0	139028957	174935	0	0	0	24323653
9004	12205413	0	43812667	0	150862690	903540	0	13407546	0	45468419
9005	2491655	0	0	0	68183517	542245	0	0	0	33912086
9006	7653369	0	0	0	374006231	2231344	0	0	0	109212138
9007	363499	0	0	0	48315328	149863	0	0	0	18829210
9008	934244	0	0	0	34263168	631805	0	0	0	26434434
9009	53401862	0	0	0	1066111881	25001930	0	0	0	515504446
9010	2484358	0	0	0	159552180	1103776	0	0	0	99220729
9011	575919	0	0	0	48630985	214767	0	0	0	37598319
9012	140755	0	0	0	26059886	339915	0	0	0	46054171
9013	1796083	0	0	0	339030082	685404	0	0	0	259112680
9014	1351788	0	0	0	1048755198	1940770	0	0	0	1248809201
9015	14732225	0	0	0	631777874	10009599	0	0	0	585093920
9016	199317	0	0	0	9563761	122787	0	0	0	8083586
9017	7219424	0	0	0	46712422	2460563	0	0	0	35803016
9018	65365699	0	0	0	1832147635	29791988	0	0	0	1418620873
9019	12953546	0	0	0	162879627	2875361	0	0	0	231061333
9020	1165835	0	0	0	48535371	2254928	0	0	0	112455481
9021	9962333	0	0	0	648379211	11342507	0	0	0	582011478
9022	3434730	0	0	0	332245702	4181493	0	0	0	299885322
9023	3662925	0	0	0	80120211	2620601	0	0	0	92524668
9024	968676	0	0	0	51158179	2795483	0	0	0	203481629
9025	2528826	0	0	0	60405608	1658022	0	0	0	64329924
9026	6368890	0	0	0	378393369	13235144	0	0	0	498012052
9027	7169908	0	0	0	803731352	9523689	0	0	0	1221559009
9028	4405336	0	0	0	78037927	2970715	0	0	0	104923312
9029	3271279	0	0	0	114970065	3060493	0	0	0	159979188
9030	2947463	0	0	0	600509667	2972273	0	0	0	786280108
9031	9718680	0	0	0	598507766	16922474	0	0	0	696317090
9032	16679229	0	0	0	729021661	6467758	0	0	0	720167504
9033	1651103	0	0	0	167223398	2467554	0	0	0	256287031
9101	448002	0	3040706	0	307775384	223932	0	374858	0	116632286
9102	3710452	0	47044200	0	331978552	376918	0	3381112	0	70252958
9103	293492	0	915865	0	6373019	117493	0	236896	0	4393577
9104	200569	0	391466	0	8904538	17073	0	14654	0	1933816
9105	8192845	0	21963024	0	75490539	813292	0	880746	0	14123657
9106	947157	0	4130865	0	17915290	59257	0	56081	0	4200832
9107	972848	0	4248717	0	26098076	265423	0	248039	0	6136649
9108	77761	0	3332787	0	6299437	7530	0	12108	0	922856
9109	110965	0	1453426	0	3178843	17922	0	28086	0	369701
9110	60930	0	0	0	3510133	10803	0	0	0	2939647
9111	94282	0	0	0	3631808	16205	0	0	0	1782414
9112	25084	0	0	0	421675	7573	0	0	0	638904
9113	228328	0	0	0	35553987	66027	0	0	0	2351189
9114	186750	0	0	0	16357364	20652	0	0	0	6909985
9201	2141497	0	38235	0	26466539	921617	0	5735	0	14428096
9202	1421492	0	575185	0	33071232	213680	0	76343	0	9002121
9203	23754	0	3733	0	549164	96851	0	8977	0	2630743
9204	58139	0	173821	0	1344180	9660	0	21613	0	571657
9205	671405	0	1599113	0	35856063	106423	0	102606	0	11649358
9206	2571914	0	2509781	0	20472101	569478	0	66922	0	9414032
9207	6105634	0	781840	0	126781755	410317	0	56388	0	13736804
9208	668214	0	6564963	0	5206377	83915	0	583202	0	2894541
9209	4103211	0	0	0	60219077	602004	0	0	0	20177139
9303	131223	0	39919	0	30806935	25870	0	5317	0	26803671
9304	835082	0	1102242	0	17931299	92376	0	26745	0	4550169
9305	222255	0	0	0	8892037	115883	0	0	0	8673312
9306	10773249	0	0	0	66861278	6859660	0	0	0	41524717
9401	755811281	0	0	0	1822528485	54818964	0	0	0	405104066
9402	7953844	0	0	0	101543768	3510659	0	0	0	53684610
9403	1365888787	0	0	0	2750957580	201876536	0	0	0	850948528
9404	38158866	0	0	0	188641529	11344335	0	0	0	76068655
9405	271228166	0	0	0	919600404	29196656	0	0	0	365792063
9406	33255671	0	0	0	81428542	49197533	0	0	0	135159164
9501	15788352	0	0	0	67839627	994861	0	0	0	7267528
9502	27103029	0	0	0	203361607	6197153	0	0	0	22760068
9503	244660603	0	0	0	1523271675	27730812	0	0	0	285483674
9504	65569672	0	0	0	1220362026	25030598	0	0	0	515641949
9505	2529653818	0	0	0	274435979	7342847	0	0	0	47631331
9506	387711977	0	0	0	822501987	20366557	0	0	0	327580052
9507	3851876	0	0	0	67830764	1299301	0	0	0	30910669
9508	4565944	0	0	0	26674770	5106940	0	0	0	39374433
9601	155141	0	0	0	1527864	13026	0	0	0	663982
9602	1264417	0	0	0	11151991	451230	0	0	0	3620680
9603	39524392	0	0	0	248638010	9284173	0	0	0	113472158
9604	67756	0	0	0	448571	77335	0	0	0	2797146
9605	3433500	0	0	0	26788676	494839	0	0	0	5789752
9606	1718661	0	0	0	23551879	1210117	0	0	0	20568765
9607	2312984	0	0	0	23120251	1405094	0	0	0	19826945
9608	22595945	0	0	0	244523767	5916566	0	0	0	129186694
9609	10963451	0	0	0	41845780	1640059	0	0	0	12055787
9610	2977767	0	0	0	11675200	669693	0	0	0	2723186
9611	678568	0	0	0	10897870	440339	0	0	0	7129439
9612	8209001	0	44024523	0	142818387	4728642	0	60410150	0	105526135
9613	4751555	0	0	0	39639397	456057	0	0	0	9092390
9614	135642	0	0	0	3938163	59176	0	0	0	2833483
9615	4014666	0	0	0	43231562	522823	0	0	0	11787358
9616	3707075	0	0	0	59929039	1233867	0	0	0	11438762
9617	4703362	0	0	0	23997601	228474	0	0	0	2855440
9618	797242	0	0	0	11201734	558770	0	0	0	14920377
9701	674248	0	0	0	2480765783	522204	0	0	0	2309394800
9702	162955	0	0	0	58094776	133645	0	0	0	84465535
9703	542936	0	0	0	166433989	513643	0	0	0	241815485
9704	124111	0	0	0	52186376	433692	0	0	0	59360277
9705	2436361	0	0	0	197422098	333483	0	0	0	99877435
9706	2888706	0	0	0	594367786	7827500	0	0	0	1197393908
9999	0	0	0	0	19083479555	0	0	0	0	16051564549

## Sheet: Comtrade2003
Commodity Code	Import(Weight)	Import(Area)	Import(Quantity Number)	Import(Volume)	Import(Trade Value)	Export(Weight)	Export(Area)	Export(Quantity Number)	Export(Volume)	Export(Trade Value)
101	1963235	0	4714	0	552016790	7157512	0	13713	0	585781728
102	1780694	0	11099	0	4348825	0	0	0	0	0
103	24267892	0	330136	0	36575798	3486481	0	26471	0	4711051
104	1830	0	65	0	78050	2181679	0	124348	0	8504532
105	504432	0	6304369	0	8020176	8929134	0	33161965	0	112286623
106	868251	0	0	0	16642552	2326746	0	0	0	17059338
201	185527948	0	0	0	729767414	4672029	0	0	0	28785368
202	109644144	0	0	0	222863331	1055370	0	0	0	3782256
203	397754983	0	0	0	769168240	71193023	0	0	0	109066855
204	112935575	0	0	0	416517552	75145719	0	0	0	307761616
205	0	0	0	0	0	1960657	0	0	0	4957533
206	57530716	0	0	0	49931812	18360941	0	0	0	8027348
207	365180281	0	0	0	1135455837	269357707	0	0	0	279199868
208	11361309	0	0	0	12525574	2788831	0	0	0	13836631
209	27834391	0	0	0	14176607	9254666	0	0	0	3370073
210	324814170	0	0	0	1061704814	15512835	0	0	0	67936233
301	2126762	0	0	0	31847980	1013497	0	0	0	11099789
302	102156106	0	0	0	242946490	96311155	0	0	0	358590388
303	71309396	0	0	0	160591566	183993690	0	0	0	189878198
304	167485469	0	0	0	718323987	66794965	0	0	0	206317970
305	3640999	0	0	0	17978499	8923319	0	0	0	87400618
306	48370972	0	0	0	346459824	60225617	0	0	0	368079322
307	11916627	0	0	0	43982870	43016215	0	0	0	152897219
401	278163183	0	0	0	128478679	315607916	0	0	0	279441569
402	64847044	0	0	0	102410837	177570158	0	0	0	326296842
403	256256227	0	0	0	312066716	21454046	0	0	0	35236587
404	28006290	0	0	0	33299002	46817328	0	0	0	23719481
405	173757758	0	0	0	701888605	44405217	0	0	0	122636088
406	343726478	0	0	0	1279898585	87968708	0	0	0	287604724
407	48230516	0	0	0	77664208	10345337	0	0	0	37693466
408	18853578	0	0	0	40539884	9574112	0	0	0	7109861
409	24902835	0	0	0	73279563	1025407	0	0	0	4389464
410	118995	0	0	0	563321	169599	0	0	0	1372702
501	30968	0	0	0	529990	6801	0	0	0	121179
502	1763306	0	0	0	12737936	1057546	0	0	0	9907735
503	107137	0	0	0	969934	95425	0	0	0	704612
504	5784503	0	0	0	15475922	5962024	0	0	0	28195652
505	3099727	0	0	0	7961585	2008336	0	0	0	3973979
506	84511310	0	0	0	22606800	228157	0	0	0	215216
507	3204823	0	0	0	1728953	6180	0	0	0	76644
508	2376063	0	0	0	1612683	4567792	0	0	0	5370098
509	39314	0	0	0	922539	107022	0	0	0	734271
510	16843	0	0	0	355283	19896	0	0	0	75619
511	77012041	0	0	0	41321890	43084700	0	0	0	15651449
601	23452145	0	0	0	74737677	12507727	0	0	0	12685581
602	126783930	0	0	0	407038417	20522890	0	0	0	18446869
603	217056372	0	0	0	899840431	6878200	0	0	0	38708856
604	12525224	0	0	0	41530924	6464324	0	0	0	2540246
701	319477476	0	0	0	138746249	264507978	0	0	0	102990260
702	340047938	0	0	0	526335919	4111950	0	0	0	8101193
703	309596933	0	0	0	158005089	16981288	0	0	0	10236989
704	164195744	0	0	0	150278132	5454375	0	0	0	5448619
705	215615217	0	0	0	213460269	4854978	0	0	0	9930154
706	79119942	0	0	0	57915931	33483418	0	0	0	12045379
707	89956016	0	0	0	112692363	5659165	0	0	0	8924654
708	37758267	0	0	0	95670073	28375337	0	0	0	10040674
709	399865296	0	0	0	806421516	4798385	0	0	0	12909983
710	2526484282	0	0	0	299289269	103418644	0	0	0	60621168
711	11642022	0	0	0	13505712	1236577	0	0	0	2587252
712	25329487	0	0	0	67592249	2375367	0	0	0	8326126
713	154174058	0	0	0	77287417	501888155	0	0	0	97034763
714	27101013	0	0	0	27470491	260449	0	0	0	1065440
801	36611792	0	0	0	75636041	1851380	0	0	0	4982130
802	35281237	0	0	0	125114558	1825521	0	0	0	7730587
803	883231662	0	0	0	534726985	3209886	0	0	0	3083256
804	119007102	0	0	0	166816058	1902626	0	0	0	4127347
805	734224408	0	0	0	525048307	35199444	0	0	0	23829706
806	308387487	0	0	0	499028226	8232911	0	0	0	16706588
807	212092796	0	0	0	157299353	9073581	0	0	0	8525317
808	593032415	0	0	0	583411346	19187540	0	0	0	15899918
809	159080191	0	0	0	246979845	1716604	0	0	0	4199570
810	93211716	0	0	0	232857049	2667809	0	0	0	6611054
811	53098410	0	0	0	83644639	3460714	0	0	0	6462612
812	20393459	0	0	0	17157083	1348195	0	0	0	1974361
813	27380024	0	0	0	98214785	3650177	0	0	0	7197492
814	749294	0	0	0	1266786	136045	0	0	0	365443
901	137223581	0	0	0	246670314	5887251	0	0	0	38687614
902	168172408	0	0	0	289135403	37320906	0	0	0	239987101
903	16562	0	0	0	24899	32377	0	0	0	166646
904	11778152	0	0	0	29735326	2439737	0	0	0	7135399
905	325269	0	0	0	16033942	81414	0	0	0	12875964
906	1000547	0	0	0	2101207	48652	0	0	0	207457
907	272867	0	0	0	797550	31359	0	0	0	251927
908	945449	0	0	0	4808429	119350	0	0	0	911765
909	8709315	0	0	0	11266280	545962	0	0	0	1617868
910	23939558	0	0	0	35938478	5194148	0	0	0	15378126
1001	1067673900	0	0	0	205974636	3617535059	0	0	0	470537137
1002	2184060	0	0	0	810318	50200	0	0	0	32489
1003	63298440	0	0	0	12956992	1132344739	0	0	0	147993385
1004	11021991	0	0	0	1708738	156835850	0	0	0	18610057
1005	1467110953	0	0	0	265617882	14990737	0	0	0	5071990
1006	763583382	0	0	0	372227365	46803697	0	0	0	49806438
1007	5872719	0	0	0	1628707	1540	0	0	0	3216
1008	64780307	0	0	0	12734830	624223	0	0	0	519495
1101	61292304	0	0	0	24662088	102242777	0	0	0	31812898
1102	20826873	0	0	0	11390813	5469364	0	0	0	2190062
1103	20051937	0	0	0	10604412	38562062	0	0	0	11482484
1104	115936939	0	0	0	13579091	156591278	0	0	0	56057034
1105	34191850	0	0	0	39245597	8352758	0	0	0	7978496
1106	1852641	0	0	0	3209604	731746	0	0	0	1097586
1107	11067859	0	0	0	7735066	387830827	0	0	0	139202137
1108	124375482	0	0	0	59386260	8336298	0	0	0	5788398
1109	20974228	0	0	0	30689119	3945359	0	0	0	2729379
1201	967475217	0	0	0	258857234	10473691	0	0	0	2776346
1202	107358437	0	0	0	81223329	500678	0	0	0	858504
1203	2442173	0	0	0	180709	2681	0	0	0	12120
1204	10852531	0	0	0	5037472	21730416	0	0	0	8373885
1205	135892638	0	0	0	44491262	272263196	0	0	0	75126515
1206	41709930	0	0	0	18056233	340848	0	0	0	411534
1207	41744004	0	0	0	22373263	961975	0	0	0	1805520
1208	30628750	0	0	0	12325914	4706437	0	0	0	2303922
1209	28303696	0	0	0	130718861	4946199	0	0	0	44997493
1210	1944889	0	0	0	9346020	1154716	0	0	0	4961189
1211	11141307	0	0	0	43956115	1183449	0	0	0	8630138
1212	29747198	0	0	0	21768197	1230277	0	0	0	5600824
1213	26384130	0	0	0	2208134	461170	0	0	0	353733
1214	23600781	0	0	0	7135116	809368	0	0	0	377412
1301	12792707	0	0	0	19726007	8021606	0	0	0	19542473
1302	24873325	0	0	0	93100529	9939010	0	0	0	47461793
1401	11595092	0	0	0	8253805	107250	0	0	0	1282778
1402	41451	0	0	0	80647	5510	0	0	0	29666
1403	156081	0	0	0	242854	184	0	0	0	25607
1404	68421171	0	0	0	14507350	497665	0	0	0	892932
1501	34674810	0	0	0	18916677	12297080	0	0	0	5452654
1502	34118152	0	0	0	16393814	17431752	0	0	0	7144221
1503	12129447	0	0	0	4208053	25511877	0	0	0	7896687
1504	48130647	0	0	0	42787144	1211457	0	0	0	10366062
1505	5354542	0	0	0	11653950	3954589	0	0	0	18497880
1506	389830	0	0	0	625634	2271927	0	0	0	1594300
1507	143972680	0	0	0	74212140	13352888	0	0	0	9416690
1508	8823839	0	0	0	11338310	7194957	0	0	0	2112248
1509	52063360	0	0	0	130711663	4692451	0	0	0	16304356
1510	2679268	0	0	0	5440141	239182	0	0	0	381477
1511	782212340	0	0	0	318789418	43856894	0	0	0	28441890
1512	109398441	0	0	0	77665627	13713189	0	0	0	10123764
1513	114157037	0	0	0	54762678	1978024	0	0	0	1805676
1514	100748540	0	0	0	73071187	269194461	0	0	0	180565827
1515	24676655	0	0	0	42030181	11039704	0	0	0	24401418
1516	42736811	0	0	0	93599546	59599915	0	0	0	53333510
1517	38405492	0	0	0	51159038	62058968	0	0	0	111634558
1518	6750527	0	0	0	7421112	12203435	0	0	0	17332772
1520	30167026	0	0	0	31223531	1385282	0	0	0	705419
1521	1406231	0	0	0	5440002	251201	0	0	0	1381800
1522	79407	0	0	0	61958	216862	0	0	0	367242
1601	48981327	0	0	0	181285134	3772151	0	0	0	9894868
1602	410725557	0	0	0	1138190488	36755115	0	0	0	149869268
1603	1397063	0	0	0	5425415	477457	0	0	0	3064540
1604	199497865	0	0	0	558114247	19754947	0	0	0	76423385
1605	51949805	0	0	0	299466101	6237314	0	0	0	38606782
1701	1264512421	0	0	0	808620834	695679488	0	0	0	210350477
1702	294501008	0	0	0	140345873	73946207	0	0	0	56691664
1703	631293522	0	0	0	56193504	40194163	0	0	0	8981569
1704	164827758	0	0	0	343227823	135776954	0	0	0	277482743
1801	161236338	0	0	0	320933684	11395395	0	0	0	13909451
1802	3640790	0	0	0	407925	6098358	0	0	0	3814353
1803	20298395	0	0	0	60357295	9488244	0	0	0	27200473
1804	40440493	0	0	0	130751416	5581989	0	0	0	18382871
1805	6718887	0	0	0	20134948	19583196	0	0	0	56581244
1806	217065361	0	0	0	741206142	120778830	0	0	0	462015162
1901	127324836	0	0	0	310587620	130769001	0	0	0	191017478
1902	262441783	0	0	0	289561471	14521151	0	0	0	30635167
1903	2644100	0	0	0	868181	277572	0	0	0	436853
1904	62148483	0	0	0	126971178	162562180	0	0	0	461042846
1905	628393330	0	0	0	1156078199	275009028	0	0	0	723972573
2001	40569734	0	0	0	45711452	4978683	0	0	0	13255714
2002	466159316	0	0	0	292211729	3020515	0	0	0	3007482
2003	11658300	0	0	0	19202431	5385325	0	0	0	320007
2004	358004776	0	0	0	254446001	35094371	0	0	0	45960522
2005	331129079	0	0	0	337781123	65489386	0	0	0	117814546
2006	9266706	0	0	0	24822127	446849	0	0	0	1220066
2007	41697420	0	0	0	77626272	12664855	0	0	0	32840953
2008	258848542	0	0	0	310624349	28272375	0	0	0	43438883
2009	795127909	0	0	0	631139613	36894970	0	0	0	45436354
2101	20226646	0	0	0	123406659	25571526	0	0	0	132450883
2102	41091972	0	0	0	37525051	22285210	0	0	0	61365271
2103	308863191	0	0	0	418695206	75857907	0	0	0	177372791
2104	36399289	0	0	0	81788867	24995056	0	0	0	55802991
2105	78900289	0	0	0	214915617	38564848	0	0	0	78155046
2106	186692360	0	0	0	723572689	125202804	0	0	0	560547590
2201	681655436	0	0	681962906	187933599	49157967	0	0	44599115	22757483
2202	694495875	0	0	682166277	510452080	376727890	0	0	374580244	265074632
2203	663401797	0	0	647128986	503426534	425842666	0	0	367459723	385902641
2204	1544545759	0	0	1482866344	4433593821	39101559	0	0	28061372	254808604
2205	21889964	0	0	16015929	26898228	538823	0	0	164457	1438373
2206	28346656	0	0	22183250	49406518	22942117	0	0	19571785	26905338
2207	75273316	0	0	114071021	53219002	216642113	0	0	275368800	116640341
2208	193961675	0	0	160519611	680231362	867517455	0	0	360506242	4808774297
2209	13437227	0	0	14172964	18458927	3095536	0	0	2548417	2296703
2301	191101314	0	0	0	131676843	20301368	0	0	0	11063030
2302	88540450	0	0	0	13203938	38961541	0	0	0	6000475
2303	475323899	0	0	0	67926666	67383497	0	0	0	10259983
2304	1842657940	0	0	0	426044366	7989198	0	0	0	3370889
2305	1654270	0	0	0	344647	0	0	0	0	0
2306	1166000164	0	0	0	124633468	196160172	0	0	0	27084152
2307	93	0	0	0	2539	2608	0	0	0	26538
2308	201041278	0	0	0	24995058	25969360	0	0	0	4639103
2309	1463189723	0	0	0	711984000	323565319	0	0	0	478479563
2401	148474232	0	0	0	477531470	13902369	0	0	0	46645809
2402	8928990	0	0	0	322107228	51198901	0	0	0	1293021442
2403	14344502	0	0	0	56770042	17973733	0	0	0	175719055
2501	218976313	0	0	0	16672288	554897139	0	0	0	40113203
2502	10703	0	0	0	22071	420543	0	0	0	26329
2503	29398799	0	0	0	4208720	477515	0	0	0	1404902
2504	19160289	0	0	0	14126318	4828812	0	0	0	6697219
2505	228183988	0	0	0	20289213	364038846	0	0	0	11568427
2506	1086537	0	0	0	869141	227945	0	0	0	1399440
2507	77321872	0	0	0	14287060	3135938100	0	0	0	364391402
2508	335622303	0	0	0	50202570	111874148	0	0	0	47300681
2509	5306471	0	0	0	829223	26795906	0	0	0	3330819
2510	1038823	0	0	0	354085	111385	0	0	0	139309
2511	56950828	0	0	0	3958519	5315559	0	0	0	2064974
2512	37002633	0	0	0	9420233	1002749	0	0	0	917247
2513	78001245	0	0	0	6901645	2420002	0	0	0	2468452
2514	29676234	0	0	0	11566814	798917	0	0	0	1112451
2515	18207858	0	0	0	18569931	7131664	0	0	0	813165
2516	1596934075	0	0	0	76809594	6028289	0	0	0	2219843
2517	1227605821	0	0	0	30661958	11613553638	0	0	0	80650383
2518	185319459	0	0	0	6747789	36862450	0	0	0	2802827
2519	100243466	0	0	0	31600011	26216843	0	0	0	27770210
2520	4975721647	0	0	0	29782431	41916609	0	0	0	14722160
2521	5342476	0	0	0	757572	211478523	0	0	0	5036287
2522	17943058	0	0	0	3689344	348898152	0	0	0	19926563
2523	1009799577	0	0	0	65475083	355735683	0	0	0	59704068
2524	2666	0	0	0	65146	5059	0	0	0	1307
2525	13705874	0	0	0	4356755	4707433	0	0	0	4968156
2526	64921516	0	0	0	16332693	3524793	0	0	0	1838194
2528	4939286	0	0	0	2610805	395159	0	0	0	660485
2529	102214045	0	0	0	13619271	1355586	0	0	0	652457
2530	613191061	0	0	0	39434922	32371159	0	0	0	31975561
2601	16137331563	0	0	0	399362826	343310	0	0	0	241185
2602	2052280	0	0	0	1186759	219297	0	0	0	792063
2603	455395	0	0	0	1111640	47279	0	0	0	259421
2604	7852	0	0	0	7324	3216341	0	0	0	11288246
2605	16367	0	0	0	278931	14722	0	0	0	158634
2607	521589	0	0	0	317258	5459	0	0	0	81451
2608	16612652	0	0	0	3946192	113003	0	0	0	1099129
2609	0	0	0	0	0	28500	0	0	0	105409
2610	107068135	0	0	0	6092620	211503	0	0	0	115955
2611	190332	0	0	0	49477	70	0	0	0	78412
2612	5	0	0	0	848	2	0	0	0	181
2613	19824349	0	0	0	101467569	77703	0	0	0	520195
2614	225610445	0	0	0	56998901	47931	0	0	0	79904
2615	38746362	0	0	0	18372488	439097	0	0	0	806740
2616	602465	0	0	0	215401063	71779	0	0	0	5769038
2617	55605	0	0	0	253719	70790	0	0	0	236085
2618	158724280	0	0	0	3208478	10588812	0	0	0	1363220
2619	202600153	0	0	0	114543714	474648	0	0	0	240574
2620	25164860	0	0	0	536179567	18331252	0	0	0	90963966
2621	119959239	0	0	0	15909195	34147059	0	0	0	16952453
2701	33952563999	0	0	0	1636441998	600625525	0	0	0	61887375
2702	1812239	0	0	0	444838	3441785	0	0	0	577356
2703	542889270	0	0	0	49871389	30735726	0	0	0	4906194
2704	983842200	0	0	0	114571027	238917853	0	0	0	26347605
2706	1205459	0	0	0	291925	4762530	0	0	0	2500332
2707	1219103492	0	0	0	367393867	516883903	0	0	0	163687572
2708	3708877	0	0	0	1437276	32731783	0	0	0	10037375
2709	44576277367	0	0	0	9752113237	70068310428	0	0	0	15223053668
2710	22473642945	0	0	0	5910434130	27059589770	0	0	0	6864760998
2711	2081876346	0	0	0	381501721	15900462170	0	0	0	2806797700
2712	22632627	0	0	0	26969243	80534254	0	0	0	40530580
2713	855959343	0	0	0	81167554	121504017	0	0	0	18373155
2714	196505787	0	0	0	31971959	93086159	0	0	0	14083024
2715	87399158	0	0	0	20341580	273505066	0	0	0	41504175
2716	9291997312	9291997312	0	0	275603546	7297778432	7297778432	0	0	276711674
2801	4358819	0	0	0	12079593	6881824	0	0	0	9436746
2802	544182	0	0	0	1327458	836031	0	0	0	782975
2803	50992744	0	0	0	46605277	74175989	0	0	0	66193403
2804	134092408	0	0	0	211922656	16839939	0	0	0	48820220
2805	6742830	0	0	0	18162519	162842	0	0	0	2531265
2806	2330788	0	0	0	1979717	11167059	0	0	0	2784291
2807	446830940	0	0	0	8691091	48230202	0	0	0	4159169
2808	3873321	0	0	0	2024610	4187788	0	0	0	2633286
2809	219654596	0	0	0	72053571	16376931	0	0	0	11118806
2810	15293102	0	0	0	7975505	185093	0	0	0	658604
2811	69598381	0	0	0	78649870	92017446	0	0	0	138166007
2812	18302031	0	0	0	19058764	290325	0	0	0	4486742
2813	2417947	0	0	0	817916	1264852	0	0	0	4458900
2814	10535017	0	0	0	3424742	192025526	0	0	0	40243059
2815	381765812	0	0	0	42425487	147622	0	0	0	700550
2816	6510416	0	0	0	3287752	352981	0	0	0	370714
2817	8360307	0	0	0	9927300	7307179	0	0	0	9991869
2818	15498173	0	0	0	9857830	5238350	0	0	0	7585147
2819	3274255	0	0	0	5863361	24316	0	0	0	123694
2820	7881698	0	0	0	3025712	4567569	0	0	0	1190144
2821	52989557	0	0	0	44384398	18097349	0	0	0	23893523
2822	599634	0	0	0	7795340	1380127	0	0	0	22128540
2823	6158199	0	0	0	14583994	2889879	0	0	0	4600004
2824	6746039	0	0	0	6356838	2665922	0	0	0	2981347
2825	19987182	0	0	0	69783548	7444567	0	0	0	44232889
2826	12460490	0	0	0	14101137	4579173	0	0	0	10591203
2827	86914050	0	0	0	60510092	35424978	0	0	0	28467523
2828	13477648	0	0	0	14132280	37057825	0	0	0	22073286
2829	3262523	0	0	0	4290509	1273427	0	0	0	6555642
2830	6913834	0	0	0	5851265	814196	0	0	0	709449
2831	2841228	0	0	0	2120101	16228	0	0	0	61269
2832	8326361	0	0	0	3582981	43816095	0	0	0	7929518
2833	127752547	0	0	0	36190671	18665565	0	0	0	9866312
2834	38213886	0	0	0	11411318	2820184	0	0	0	5260156
2835	193951597	0	0	0	93888973	61774211	0	0	0	60976596
2836	259088740	0	0	0	60281265	56804864	0	0	0	52787301
2837	5557424	0	0	0	3761451	565033	0	0	0	195328
2838	8921426	0	0	0	11812058	938944	0	0	0	3442583
2839	37218304	0	0	0	19302011	11152311	0	0	0	8237374
2840	31276382	0	0	0	11145724	1940823	0	0	0	3418788
2841	9836640	0	0	0	10559058	4696289	0	0	0	7114959
2842	9101225	0	0	0	9038463	57780244	0	0	0	31203079
2843	216652	0	0	0	59449923	953212	0	0	0	431450944
2844	1232613	0	0	0	333853859	7857502	0	0	0	126446887
2845	12094	0	0	0	2797033	17747	0	0	0	3350668
2846	3267076	0	0	0	17493736	1400045	0	0	0	16176782
2847	28761714	0	0	0	9376736	2716764	0	0	0	1350414
2848	50211	0	0	0	1187401	6803	0	0	0	173677
2849	31654260	0	0	0	54842081	399522	0	0	0	3813972
2850	1010384	0	0	0	10338599	290372	0	0	0	9455746
2851	2387394	0	0	0	7980970	1232272	0	0	0	12382569
2901	134732206	0	0	0	81384089	1742250374	0	0	0	913953368
2902	622694915	0	0	0	377575158	1050550682	0	0	0	444344614
2903	380352247	0	0	0	290006705	115572092	0	0	0	225855881
2904	40535506	0	0	0	91584972	19088997	0	0	0	39347300
2905	461353396	0	0	0	319407979	140084837	0	0	0	117338640
2906	15705098	0	0	0	43998781	2641933	0	0	0	25087508
2907	132530675	0	0	0	137143887	28833244	0	0	0	191919491
2908	3090336	0	0	0	12265510	9210332	0	0	0	34107906
2909	144899573	0	0	0	328729080	29595744	0	0	0	81334454
2910	58455111	0	0	0	51806422	1618245	0	0	0	6460451
2911	674780	0	0	0	2926356	108963	0	0	0	854411
2912	20147158	0	0	0	59251146	11820779	0	0	0	61053771
2913	368625	0	0	0	10359170	12965	0	0	0	707210
2914	213092997	0	0	0	177891178	72691448	0	0	0	196740463
2915	290312316	0	0	0	250085737	265941368	0	0	0	292304468
2916	373681247	0	0	0	266508700	59142087	0	0	0	199798857
2917	272924781	0	0	0	213316153	431192692	0	0	0	297043999
2918	67419169	0	0	0	198154129	41358147	0	0	0	182717447
2919	8726001	0	0	0	19123800	21944703	0	0	0	50966828
2920	19445555	0	0	0	34695000	4111565	0	0	0	16970718
2921	91302428	0	0	0	312907456	284532544	0	0	0	252461142
2922	90345382	0	0	0	880476416	89480919	0	0	0	485736087
2923	15169620	0	0	0	31266180	18816547	0	0	0	30081894
2924	32755902	0	0	0	216701781	38727768	0	0	0	208389338
2925	3701090	0	0	0	23544674	27248640	0	0	0	99195744
2926	5903568	0	0	0	22843230	111635661	0	0	0	283873081
2927	3295147	0	0	0	11749642	932805	0	0	0	6804783
2928	1763765	0	0	0	12764267	2104118	0	0	0	20951893
2929	41977760	0	0	0	87729994	2970815	0	0	0	11120476
2930	67137136	0	0	0	633657584	8699433	0	0	0	1020028108
2931	14670329	0	0	0	53874350	122757234	0	0	0	271189090
2932	16815919	0	0	0	1652203672	0	0	0	0	228480050
2933	72752963	0	0	0	1877458439	0	0	0	0	1302768413
2934	6473065	0	0	0	511190372	10823189	0	0	0	925194830
2935	3603151	0	0	0	436770560	676681	0	0	0	120128719
2936	20962140	0	0	0	123465913	3375324	0	0	0	70579273
2937	1305030	0	0	0	73342605	519019	0	0	0	464869702
2938	515284	0	0	0	4616663	95837	0	0	0	10907536
2939	442126	0	0	0	141873151	0	0	0	0	34086260
2940	7136471	0	0	0	17986930	5654229	0	0	0	11661494
2941	7742304	0	0	0	311828991	6081560	0	0	0	418187219
2942	1654967	0	0	0	26739521	942944	0	0	0	46925147
3001	497664	0	0	0	56213847	3154839	0	0	0	20806276
3002	4149305	0	0	0	926091344	4458743	0	0	0	729474208
3003	12556059	0	0	0	456475780	4090267	0	0	0	243909215
3004	165359542	0	0	0	11224209901	198949296	0	0	0	17297425257
3005	12126541	0	0	0	243424214	16093789	0	0	0	405392808
3006	4241075	0	0	0	269791754	3449288	0	0	0	517529707
3101	13346797	0	0	0	4996024	5411809	0	0	0	6881596
3102	2112716285	0	0	0	289052759	246022622	0	0	0	44000606
3103	239715504	0	0	0	35828941	2140351	0	0	0	589809
3104	273145994	0	0	0	41234441	1295424	0	0	0	1647604
3105	1206382853	0	0	0	205039714	70160294	0	0	0	38096260
3201	1580518	0	0	0	2036061	154872	0	0	0	1976297
3202	1582472	0	0	0	3235352	34229650	0	0	0	34796851
3203	3725833	0	0	0	24806870	7337489	0	0	0	14078032
3204	56322716	0	0	0	389189569	74758076	0	0	0	482613207
3205	175271	0	0	0	2739111	521921	0	0	0	15800918
3206	168086165	0	0	0	222044177	245477266	0	0	0	482019874
3207	22615245	0	0	0	72889454	15251545	0	0	0	150769556
3208	72093888	0	0	0	290169269	145271862	0	0	0	488614313
3209	85609213	0	0	0	171669800	71573965	0	0	0	128575021
3210	5088128	0	0	0	17094794	9967458	0	0	0	34039959
3211	3180584	0	0	0	2869902	6443721	0	0	0	13007145
3212	5631652	0	0	0	53567845	13621892	0	0	0	125169979
3213	23865675	0	0	0	23524741	5954072	0	0	0	43926402
3214	194764976	0	0	0	192351885	52798877	0	0	0	139893282
3215	74090474	0	0	0	367943654	78660713	0	0	0	633708488
3301	13065220	0	0	0	142700988	6859169	0	0	0	108238409
3302	40634764	0	0	0	668747628	58281242	0	0	0	594456857
3303	40232923	0	0	0	718424196	29364451	0	0	0	458729510
3304	103184260	0	0	0	1101642827	63521112	0	0	0	981584806
3305	116146358	0	0	0	432488320	107008950	0	0	0	467374609
3306	23796983	0	0	0	111712477	143838266	0	0	0	495435170
3307	120845610	0	0	0	437355930	192175035	0	0	0	831306769
3401	308826966	0	0	0	291990353	631247116	0	0	0	344493102
3402	771183429	0	0	0	752507362	809229209	0	0	0	837549779
3403	63182979	0	0	0	89774342	74426232	0	0	0	155192522
3404	29858692	0	0	0	60068723	15572426	0	0	0	28525147
3405	46187360	0	0	0	65324991	21396438	0	0	0	71460113
3406	53626560	0	0	0	121121378	12959476	0	0	0	58763920
3407	4743126	0	0	0	13997014	660274	0	0	0	5222551
3501	6694199	0	0	0	23494895	6097101	0	0	0	23508360
3502	8093409	0	0	0	35668503	1531275	0	0	0	20112775
3503	15994930	0	0	0	71481372	0	0	0	0	0
3504	4684700	0	0	0	34494162	10321357	0	0	0	65879004
3505	124512168	0	0	0	100914901	29025033	0	0	0	43736140
3506	76594146	0	0	0	201448293	127653219	0	0	0	247476126
3507	8141015	0	0	0	108729119	4386751	0	0	0	242943314
3604	22794923	0	0	0	43871837	363072	0	0	0	2303796
3605	1936770	0	0	0	9045664	50154	0	0	0	409880
3606	2187263	0	0	0	5381513	27519043	0	0	0	26234081
3701	52472069	0	0	0	288230355	41357749	0	0	0	358454963
3702	18143557	0	0	0	431699418	14701929	0	0	0	488352116
3703	16413438	0	0	0	94126550	191092835	0	0	0	348549748
3704	40935	0	0	0	2506353	2401123	0	0	0	3717904
3705	1191346	0	0	0	18778856	455558	0	0	0	71069172
3706	2676853	0	0	0	9853931	817989	0	0	0	40905943
3707	32886073	0	0	0	304517385	21402392	0	0	0	275420419
3801	16549249	0	0	0	24359236	8661381	0	0	0	23574216
3802	88726069	0	0	0	40883527	28103780	0	0	0	43172755
3803	13438084	0	0	0	6682698	53503	0	0	0	216281
3804	43802579	0	0	0	9929433	1640464	0	0	0	911342
3805	2692153	0	0	0	2556968	295637	0	0	0	1754295
3806	46698365	0	0	0	63415320	9348788	0	0	0	19137843
3807	157847	0	0	0	161543	1606600	0	0	0	1574017
3808	116945651	0	0	0	545634629	135868705	0	0	0	1110068897
3809	178936784	0	0	0	102878605	28905592	0	0	0	59540589
3810	8923156	0	0	0	20488052	10133255	0	0	0	57544473
3811	17987653	0	0	0	36203266	162145106	0	0	0	256852666
3812	29895846	0	0	0	81005471	28549054	0	0	0	65295529
3813	2823995	0	0	0	6153881	24586080	0	0	0	31240060
3814	9966835	0	0	0	20864314	28888860	0	0	0	49766035
3815	21453847	0	0	0	160363998	50028718	0	0	0	219794726
3816	118571005	0	0	0	33547380	80165414	0	0	0	87585578
3817	72320709	0	0	0	71245063	5161872	0	0	0	5503951
3818	451940	0	0	0	69914203	448105	0	0	0	203172227
3819	6478719	0	0	0	10029082	21544048	0	0	0	39667195
3820	12999714	0	0	0	14891296	29851961	0	0	0	28475404
3821	22264135	0	0	0	34317582	2867394	0	0	0	77772745
3822	28093190	0	0	0	753649699	11212323	0	0	0	1209048391
3823	381172737	0	0	0	154127753	67675823	0	0	0	62294336
3824	513999682	0	0	0	938333184	640398416	0	0	0	1117343231
3825	1467770	0	0	0	2621805	1952019	0	0	0	1408183
3901	1528515599	0	0	0	1201294431	33567266	0	0	0	99812258
3902	640126160	0	0	0	583250465	256994082	0	0	0	255920816
3903	258164674	0	0	0	323065473	252734222	0	0	0	298707830
3904	399793454	0	0	0	395738985	182209650	0	0	0	217268342
3905	39253752	0	0	0	83136417	46687821	0	0	0	68378893
3906	178346318	0	0	0	287198109	270795014	0	0	0	536227006
3907	510551576	0	0	0	888411676	287894929	0	0	0	526631051
3908	90670601	0	0	0	230125311	13626800	0	0	0	35028039
3909	84499978	0	0	0	159655801	96873863	0	0	0	194802390
3910	33822999	0	0	0	111327373	123751534	0	0	0	354442820
3911	48787707	0	0	0	125227996	28771820	0	0	0	174308250
3912	35935498	0	0	0	123146690	7960168	0	0	0	61647055
3913	3604308	0	0	0	34445123	5381973	0	0	0	40770417
3914	9265050	0	0	0	35973519	0	0	0	0	0
3915	14381721	0	0	0	6586602	197686628	0	0	0	56113619
3916	61697173	0	0	0	137873571	22342705	0	0	0	73033248
3917	119820495	0	0	0	287644633	86503698	0	0	0	550157160
3918	78699386	0	0	0	150810676	71201461	0	0	0	192559790
3919	87710327	0	0	0	384831408	42166086	0	0	0	330977673
3920	600506339	0	0	0	1564367437	313762440	0	0	0	1067604694
3921	169658549	0	0	0	611906075	78202747	0	0	0	428323056
3922	20088497	0	0	0	114538223	17862300	0	0	0	105065093
3923	695085226	0	0	0	1558470636	228847277	0	0	0	873246769
3924	113413246	0	0	0	361512335	20671302	0	0	0	134663136
3925	48441683	0	0	0	190975749	46174961	0	0	0	211792547
3926	501016254	0	0	0	1679280062	176763516	0	0	0	958000786
4001	111582303	0	0	0	113426057	23233684	0	0	0	11529545
4002	163292780	0	0	0	267298044	147727293	0	0	0	212779701
4003	2065791	0	0	0	1232621	191442	0	0	0	404364
4004	4616937	0	0	0	1475414	7709885	0	0	0	9009666
4005	53910672	0	0	0	93579899	132132494	0	0	0	246169802
4006	5635723	0	0	0	21509695	4242929	0	0	0	12961361
4007	1536750	0	0	0	4426793	467034	0	0	0	2696686
4008	27232137	0	0	0	112633782	42833437	0	0	0	144029467
4009	33805195	0	0	0	272381762	18784289	0	0	0	154934294
4010	15295983	0	0	0	112388611	8647990	0	0	0	141977294
4011	509944545	0	50792797	0	1696097696	226704734	0	20686457	0	844159893
4012	23007797	0	0	0	30839105	26799873	0	0	0	38576610
4013	4264238	0	18596249	0	13065815	571339	0	320921	0	2428737
4014	3447259	0	0	0	55399756	2876518	0	0	0	72612129
4015	40165226	0	0	0	163034819	9441202	0	0	0	59141897
4016	83651989	0	0	0	464585751	44877674	0	0	0	451805576
4017	2124435	0	0	0	7025503	1836911	0	0	0	3347050
4101	34684405	0	0	0	62467203	50432712	0	0	0	91401785
4102	5469406	0	0	0	25920954	58249069	0	0	0	140832491
4103	1303312	0	0	0	2698408	4558513	0	0	0	6681807
4104	2951781	0	0	0	25285547	29574143	0	0	0	115532094
4105	130041	0	0	0	3673705	269866	0	0	0	7299079
4106	52037	0	0	0	667279	1445565	0	0	0	6059424
4107	8364877	0	0	0	173073462	7844215	0	0	0	139123400
4112	236640	0	0	0	10422661	1033239	0	0	0	42094682
4113	141610	0	0	0	5042429	40779	0	0	0	1936971
4114	588661	0	0	0	11947536	462355	0	0	0	9320709
4115	1344262	0	0	0	3622316	2642388	0	0	0	3656501
4201	4322220	0	0	0	42504614	1085954	0	0	0	40271795
4202	152573782	0	0	0	1253060689	17587548	0	0	0	271001097
4203	15816885	0	0	0	344430156	1923726	0	0	0	90658736
4204	179368	0	0	0	1461274	282245	0	0	0	3348066
4205	6782688	0	0	0	87782434	1107040	0	0	0	34462636
4206	51426909	0	0	0	681032	14349	0	0	0	138926
4301	652399	0	0	0	10585890	38451	0	0	0	6013393
4302	591244	0	0	0	38103028	304246	0	0	0	32103988
4303	276280	0	0	0	20016350	122509	0	0	0	10640919
4304	259142	0	0	0	4248191	139308	0	0	0	2193967
4401	159839157	0	0	0	14824697	337086656	0	0	0	13188432
4402	54454138	0	0	0	23549907	8291748	0	0	0	7868278
4403	531149987	0	0	0	132917500	83340767	0	0	0	22571006
4404	20854764	0	0	0	7589625	23141897	0	0	0	5434052
4405	2120077	0	0	0	1334038	707386	0	0	0	790341
4406	47602349	0	0	0	8347280	39166	0	0	0	78324
4407	4964778418	0	0	0	2046593646	198351935	0	0	0	76014875
4408	20829445	0	0	0	62007122	3820061	0	0	0	14966082
4409	201053241	0	0	0	218310772	55355413	0	0	0	49751731
4410	804944130	0	0	0	264741017	183185478	0	0	0	63722432
4411	705057735	0	0	0	499011801	132219221	0	0	0	41652634
4412	770477647	0	0	0	494971121	42113534	0	0	0	33912721
4413	22483188	0	0	0	15081411	1147752	0	0	0	2702215
4414	31804009	0	0	0	35743417	2281566	0	0	0	11854263
4415	414862539	0	19504030	0	173109991	415139701	0	15118250	0	167995556
4416	17267631	0	0	0	18043923	140946	0	0	0	349112
4417	7132540	0	0	0	11734278	838129	0	0	0	10578715
4418	276196652	0	0	0	587211051	31067210	0	0	0	103004374
4419	23028816	0	0	0	64330740	3041124	0	0	0	17952933
4420	20801817	0	0	0	72244946	1473123	0	0	0	14479897
4421	153357059	0	0	0	232167862	10369750	0	0	0	39645588
4501	523337	0	0	0	1557391	3911235	0	0	0	283374
4502	338878	0	0	0	991717	24333	0	0	0	210655
4503	756516	0	0	0	8747613	31033	0	0	0	266310
4504	2812408	0	0	0	7705187	405999	0	0	0	3442348
4601	7491516	0	0	0	12756419	394022	0	0	0	2115259
4602	28294736	0	0	0	74639751	692615	0	0	0	5353237
4701	91894864	0	0	0	51226790	1260938	0	0	0	704249
4702	7856109	0	0	0	3872665	9105	0	0	0	168056
4703	1557776913	0	0	0	776380611	247034	0	0	0	156762
4704	98608312	0	0	0	50589977	16670	0	0	0	39640
4705	14284751	0	0	0	10189405	36155	0	0	0	48545
4706	52976281	0	0	0	49475561	7561203	0	0	0	7460579
4707	101592501	0	0	0	16372956	1955502445	0	0	0	284464311
4801	1728898713	0	0	0	923615726	166978540	0	0	0	92535253
4802	1670568418	0	0	0	1383679514	293976642	0	0	0	450987129
4803	136559405	0	0	0	159542550	23439416	0	0	0	28905157
4804	812716531	0	0	0	482319640	51608922	0	0	0	53990750
4805	476690910	0	0	0	253448373	617211926	0	0	0	314252045
4806	71327309	0	0	0	105379471	9116698	0	0	0	27023899
4807	75517659	0	0	0	42191472	6461477	0	0	0	15451541
4808	14423239	0	0	0	21951220	47497033	0	0	0	64721666
4809	48369796	0	0	0	68166781	121639542	0	0	0	61661373
4810	2919987001	0	0	0	2341460996	297214273	0	0	0	322767922
4811	252267795	0	0	0	602198443	179808293	0	0	0	514823233
4812	166348	0	0	0	833115	1676742	0	0	0	7340206
4813	10045275	0	0	0	63789184	13992276	0	0	0	75916871
4814	19632213	0	0	0	78170944	22365406	0	0	0	116933290
4815	62486	0	0	0	183577	163352	0	0	0	661031
4816	23669547	0	0	0	35968535	13548710	0	0	0	27955307
4817	90959282	0	0	0	167756880	7305643	0	0	0	35119564
4818	308882339	0	0	0	676415193	155971315	0	0	0	440565105
4819	343677820	0	0	0	485687897	178603039	0	0	0	355045528
4820	88455161	0	0	0	224547184	19271847	0	0	0	103297971
4821	179855593	0	0	0	141142789	48177643	0	0	0	168986230
4822	3737516	0	0	0	7317515	9530463	0	0	0	10768515
4823	169394851	0	0	0	324101382	73468680	0	0	0	286617954
4901	215656742	0	0	0	1227597222	215662287	0	0	0	2067235964
4902	172982901	0	0	0	374443045	84046829	0	0	0	906128308
4903	9703580	0	0	0	26950650	3299560	0	0	0	23368836
4904	562663	0	0	0	9660094	926199	0	0	0	27954523
4905	2347204	0	0	0	13319114	862051	0	0	0	50259667
4906	1588191	0	0	0	6617236	122683	0	0	0	17053379
4907	3116934	0	0	0	82515041	1624660	0	0	0	51984934
4908	3473046	0	0	0	30752734	5043881	0	0	0	46467681
4909	21936116	0	0	0	109796535	22347538	0	0	0	119494273
4910	5549872	0	0	0	28771283	6476694	0	0	0	16415273
4911	175035150	0	0	0	504290900	41740868	0	0	0	249865174
5001	1806	0	0	0	11022	394	0	0	0	22661
5002	22970	0	0	0	424835	10099	0	0	0	117351
5003	150058	0	0	0	1192654	100625	0	0	0	1135997
5004	160677	0	0	0	5189857	20236	0	0	0	237146
5005	53399	0	0	0	1377664	50319	0	0	0	94693
5006	55948	0	0	0	867387	3056	0	0	0	210501
5007	808907	0	0	0	53016986	481438	0	0	0	44432729
5101	68734391	0	0	0	115361927	40764894	0	0	0	94373714
5102	5138910	0	0	0	79445268	834763	0	0	0	24359637
5103	4441568	0	0	0	6460518	6411427	0	0	0	10921138
5104	44342	0	0	0	119142	118367	0	0	0	119128
5105	7718224	0	0	0	48833203	7053481	0	0	0	44405936
5106	9389295	0	0	0	42732688	7152821	0	0	0	54526254
5107	6684082	0	0	0	74106592	2687238	0	0	0	27955031
5108	274307	0	0	0	10774618	368401	0	0	0	17134542
5109	196041	0	0	0	3261339	882982	0	0	0	9085720
5110	19643	0	0	0	147696	5846	0	0	0	130163
5111	2313129	0	0	0	40184813	3315238	0	0	0	80726059
5112	1544397	0	0	0	43400731	3351535	0	0	0	138103669
5113	51272	0	0	0	506643	27082	0	0	0	1327212
5201	18040009	0	0	0	24018713	201644	0	0	0	1713264
5202	14295102	0	0	0	9611354	864017	0	0	0	1587437
5203	13023156	0	0	0	18554068	394271	0	0	0	1516146
5204	359231	0	0	0	2847725	336637	0	0	0	4380666
5205	26535086	0	0	0	94008870	16413783	0	0	0	43458145
5206	6197420	0	0	0	18538878	110468	0	0	0	1651264
5207	3490320	0	0	0	8183679	801496	0	0	0	9314843
5208	29481236	0	0	0	184209412	10903528	0	0	0	159049054
5209	30867509	0	0	0	160664976	6305866	0	0	0	78518347
5210	7273273	0	0	0	50510466	1356520	0	0	0	19161957
5211	8107925	0	0	0	88585092	4017692	0	0	0	32753955
5212	1101201	0	0	0	17473909	454436	0	0	0	9530230
5301	2872971	0	0	0	10415895	125036	0	0	0	135354
5302	168615	0	0	0	134402	2056889	0	0	0	1038804
5303	2801024	0	0	0	1328980	42902	0	0	0	2607814
5304	153032	0	0	0	153596	29175	0	0	0	104424
5305	19704757	0	0	0	16291674	160533	0	0	0	415280
5306	2999212	0	0	0	23075710	2048881	0	0	0	27069748
5307	6819805	0	0	0	6046814	291860	0	0	0	478336
5308	577460	0	0	0	1041635	120250	0	0	0	629764
5309	3509045	0	0	0	58942688	3700339	0	0	0	94367877
5310	14825539	0	0	0	14753257	2903249	0	0	0	4221174
5311	198829	0	0	0	1830121	395956	0	0	0	2960830
5401	1630142	0	0	0	15695227	2214418	0	0	0	34503374
5402	159646424	0	0	0	520056601	49150526	0	0	0	164235623
5403	4379919	0	0	0	19533894	794372	0	0	0	3854876
5404	8805091	0	0	0	55519789	9505306	0	0	0	42155106
5405	19849	0	0	0	322131	20105	0	0	0	192130
5406	460809	0	0	0	2482458	132792	0	0	0	1204559
5407	107168150	0	0	0	517554114	46348697	0	0	0	370459767
5408	4701987	0	0	0	81561638	1564418	0	0	0	23877164
5501	2016950	0	0	0	5363331	1064405	0	0	0	3285573
5502	3170102	0	0	0	13488367	590365	0	0	0	949108
5503	154070824	0	0	0	215490063	45911564	0	0	0	63701447
5504	7665388	0	0	0	14084498	1125494	0	0	0	1830121
5505	30057739	0	0	0	24189048	24811204	0	0	0	21894918
5506	4397030	0	0	0	11824939	7772146	0	0	0	20963753
5507	34767	0	0	0	127610	318	0	0	0	9417
5508	1348647	0	0	0	9050739	454409	0	0	0	5684777
5509	29482498	0	0	0	126015113	2556273	0	0	0	20547695
5510	7847309	0	0	0	24329146	154264	0	0	0	835724
5511	1238165	0	0	0	4400304	569522	0	0	0	7031991
5512	3283783	0	0	0	41844458	2874790	0	0	0	32595211
5513	24363939	0	0	0	89533693	4713086	0	0	0	26978001
5514	15514484	0	0	0	60139715	7158217	0	0	0	64231971
5515	8751835	0	0	0	92149904	20223375	0	0	0	183253928
5516	16916826	0	0	0	145316474	4599479	0	0	0	73706993
5601	33003894	0	0	0	94064092	16648414	0	0	0	133268043
5602	14189391	0	0	0	45439571	12979420	0	0	0	61469351
5603	108003213	0	0	0	356950401	33997076	0	0	0	154536264
5604	1413868	0	0	0	10976643	798893	0	0	0	8762142
5605	259834	0	0	0	4544491	232463	0	0	0	6703154
5606	1060409	0	0	0	12064556	16153	0	0	0	446681
5607	16319063	0	0	0	38788860	6610555	0	0	0	37353857
5608	4721362	0	0	0	20970753	925325	0	0	0	10607177
5609	803347	0	0	0	3885103	419741	0	0	0	4262523
5701	5035102	2841906	0	0	60437244	965829	599733	0	0	23573192
5702	52477068	26629723	0	0	220826055	7709520	4959850	0	0	121522815
5703	266962793	140588450	0	0	862576555	27444397	10917455	0	0	137001036
5704	23013965	18346855	0	0	44973564	4054603	58541488	0	0	10512425
5705	7186790	6170753	0	0	28476539	10034183	3209591	0	0	45137436
5801	14297916	0	0	0	175973415	2895258	0	0	0	48429687
5802	444144	0	0	0	3907578	200284	0	0	0	1834856
5803	173750	0	0	0	1515511	97509	0	0	0	1553768
5804	782329	0	0	0	15140766	436371	0	0	0	17599280
5805	44162	0	0	0	2070475	15964	0	0	0	3524248
5806	8721554	0	0	0	56807569	7056971	0	0	0	83839759
5807	779557	0	0	0	12825508	2927374	0	0	0	53388026
5808	6624976	0	0	0	28389941	594416	0	0	0	13987397
5809	36615	0	0	0	1257739	62843	0	0	0	876761
5810	2955980	0	0	0	74810217	785276	0	0	0	19299801
5811	33379612	0	0	0	8679969	150372	0	0	0	2118724
5901	3573049	0	0	0	9377712	1158923	0	0	0	11858360
5902	8839957	0	0	0	41294360	1841583	0	0	0	12519505
5903	12259223	0	0	0	92729002	21042579	0	0	0	298201337
5904	5064503	1665544	0	0	8403821	9273671	3299755	0	0	22319398
5905	102686	0	0	0	2350504	229652	0	0	0	1894091
5906	6438062	0	0	0	35550041	6946736	0	0	0	44406264
5907	2407373	0	0	0	20787383	2364532	0	0	0	17266495
5908	57322	0	0	0	577645	73109	0	0	0	1227341
5909	404451	0	0	0	4312344	1345009	0	0	0	19227470
5910	689609	0	0	0	7442470	2824688	0	0	0	20411973
5911	2702607	0	0	0	84316149	5637217	0	0	0	159762661
6001	8726716	0	0	0	44619034	3923686	0	0	0	31785510
6002	4163354	0	0	0	44425585	3456517	0	0	0	46942634
6003	495360	0	0	0	4878043	364254	0	0	0	11129899
6004	3071853	0	0	0	45724320	2582889	0	0	0	39264702
6005	6049218	0	0	0	45095381	9788754	0	0	0	68999742
6006	5518216	0	0	0	36226396	2578218	0	0	0	31172898
6101	3907315	0	7915448	0	76570271	497697	0	730650	0	20883111
6102	41987844	0	21748364	0	202208142	1386591	0	2141055	0	42433869
6103	13976676	0	45486497	0	218315036	1899296	0	2948546	0	44018556
6104	36422751	0	149050422	0	662500087	3464878	0	11187736	0	143310706
6105	25861100	0	350824870	0	400448594	2639048	0	8536720	0	95843915
6106	13645271	0	62808783	0	283696190	5765179	0	12236126	0	114669622
6107	18883771	0	164825742	0	262636404	1138479	0	9132380	0	27269996
6108	37687423	0	427661395	0	668147558	1567056	0	26250459	0	74513661
6109	124992139	0	564168843	0	2249239878	13860145	0	63967158	0	368637421
6110	134918518	0	1073563107	0	2457600315	28615583	0	1233446781	0	585621311
6111	21348757	0	0	0	395339873	2540553	0	0	0	77404486
6112	8098043	0	38201116	0	194101108	1248140	0	10544785	0	72773374
6113	806933	0	0	0	16336485	133604	0	0	0	6333231
6114	4926860	0	0	0	101421911	441465	0	0	0	22584618
6115	37820508	0	0	0	528383450	2909791	0	0	0	79175801
6116	9710694	0	0	0	98262508	1096360	0	0	0	22367067
6117	3301077	0	0	0	61140693	7070289	0	0	0	63162664
6201	24359468	0	28892638	0	448519905	3500955	0	3751321	0	136658735
6202	35161647	0	46128581	0	625573533	2621241	0	3981569	0	132175259
6203	99967527	0	193549609	0	2011034665	10111787	0	12812722	0	266112675
6204	162999263	0	441814211	0	3570851201	20166900	0	33620335	0	576707966
6205	44796988	0	461196141	0	912772228	4710642	0	10911930	0	129130592
6206	38137462	0	126644850	0	878609786	5045859	0	18441308	0	184185293
6207	6356133	0	0	0	89777967	987514	0	0	0	17902713
6208	11895935	0	0	0	230563592	697587	0	0	0	26740560
6209	9274118	0	0	0	186074471	1328986	0	0	0	23815218
6210	16733755	0	0	0	316242112	6720370	0	0	0	159848704
6211	18039023	0	0	0	341669389	2481030	0	0	0	85161339
6212	14191103	0	0	0	620185288	1456880	0	0	0	107649685
6213	676254	0	0	0	6254741	22399	0	0	0	1212579
6214	6890920	0	26688641	0	101521996	1241841	0	7269896	0	94023794
6215	1474024	0	0	0	63639016	348991	0	0	0	32496266
6216	2322352	0	0	0	22076739	317569	0	0	0	5660498
6217	3265377	0	0	0	46419974	17494865	0	0	0	325610823
6301	9742281	0	0	0	59436742	1921881	0	0	0	26359350
6302	142909128	0	0	0	803968401	9286044	0	0	0	109315936
6303	33497714	0	0	0	240472500	1898483	0	0	0	31515553
6304	21078894	0	0	0	128203287	936425	0	0	0	18910320
6305	29716244	0	0	0	61796717	3743759	0	0	0	13990508
6306	29046313	0	0	0	126551447	2285426	0	0	0	22029790
6307	36666516	0	0	0	179090954	7793823	0	0	0	154864417
6308	296661	0	0	0	4200263	129247	0	0	0	3412509
6309	12739312	0	0	0	9889239	205924501	0	0	0	169371007
6310	24061723	0	0	0	10209454	6862698	0	0	0	7092331
6401	5752757	0	0	0	28036309	1263143	0	0	0	12001486
6402	48515164	0	0	0	554326787	3252419	0	0	0	74053970
6403	152737228	0	0	0	2948573401	14430997	0	0	0	498791073
6404	43992318	0	0	0	576421563	2886188	0	0	0	83682646
6405	15172389	0	0	0	168421594	1331367	0	0	0	26263812
6406	5946903	0	0	0	97956690	2025127	0	0	0	26293425
6501	18176	0	0	0	745698	8202	0	0	0	305208
6502	68765	0	0	0	411783	2174	0	0	0	54223
6503	618730	0	1501475	0	5435348	26924	0	1808033	0	1327722
6504	669203	0	0	0	9249632	107077	0	0	0	5627829
6505	9760604	0	0	0	160777381	1526257	0	0	0	49883735
6506	4721362	0	0	0	88655830	3046178	0	0	0	47176430
6507	451269	0	0	0	6541162	418308	0	0	0	4118000
6601	14533296	0	20913927	0	58507776	1154303	0	1413951	0	12893871
6602	287226	0	38460930	0	3811694	69585	0	1877170	0	1732757
6603	1419556	0	0	0	2365724	8463209	0	0	0	17887144
6701	342207	0	0	0	2841946	18671	0	0	0	363176
6702	10561475	0	0	0	65133814	781310	0	0	0	10874982
6703	179937	0	0	0	6950064	14306	0	0	0	927540
6704	1207458	0	0	0	24493753	211099	0	0	0	6045054
6801	91169244	0	0	0	21764792	5357861	0	0	0	1907939
6802	168172624	0	0	0	175028732	6831554	0	0	0	11410170
6803	157002843	0	0	0	81102762	15812506	0	0	0	17140820
6804	16741024	0	0	0	85017945	4040279	0	0	0	37459035
6805	12561952	0	0	0	92041390	17642414	0	0	0	154255364
6806	149426726	0	0	0	111802635	68575804	0	0	0	126623842
6807	54097463	0	0	0	46938619	34203587	0	0	0	33371024
6808	19208557	0	0	0	11305221	22282203	0	0	0	17081915
6809	318832028	0	0	0	56301084	116489096	0	0	0	29163417
6810	110069210	0	0	0	55523405	953152347	0	0	0	172898687
6811	62512033	0	0	0	30414693	23630772	0	0	0	14734373
6812	429841	0	0	0	1810956	1320829	0	0	0	7421405
6813	7929059	0	0	0	55884835	3505695	0	0	0	35851154
6814	312909	0	0	0	3669898	409085	0	0	0	5705839
6815	28646072	0	0	0	116401798	22436937	0	0	0	143360367
6901	75050913	0	0	0	25344728	10985519	0	0	0	5079100
6902	112318132	0	0	0	66070196	89443650	0	0	0	66250632
6903	8734277	0	0	0	30861022	38324879	0	0	0	149608668
6904	246821740	0	0	0	36416874	53606843	0	0	0	13465244
6905	28263819	0	0	0	10793565	10450582	0	0	0	5379023
6906	1752602	0	0	0	1427966	45620673	0	0	0	19211397
6907	55436696	3249180	0	0	53989032	4450678	386298	0	0	4522999
6908	674309646	59510980	0	0	492302812	21716622	2073257	0	0	21855544
6909	5672678	0	0	0	33106738	1029530	0	0	0	20025270
6910	99523763	0	0	0	198865055	19348149	0	0	0	59999038
6911	32350485	0	0	0	110045709	44985297	0	0	0	175463281
6912	77527660	0	0	0	164132154	42427904	0	0	0	204004598
6913	89021274	0	0	0	119477614	6461508	0	0	0	41839933
6914	71937967	0	0	0	54669365	3433884	0	0	0	18469632
7001	40512355	0	0	0	4780634	127627337	0	0	0	24670148
7002	19318188	0	0	0	26935717	2239775	0	0	0	6063497
7003	6969969	0	0	0	7081741	5870272	0	0	0	6920946
7004	15772299	5366087	0	0	7045225	2664574	3348387	0	0	8170387
7005	243727123	28264744	0	0	126029139	148373368	16000312	0	0	67368153
7006	19632937	0	0	0	12768794	1737317	0	0	0	8630417
7007	147961288	0	0	0	397307236	38124774	0	0	0	163953094
7008	10682608	0	0	0	27107444	2126295	0	0	0	7587466
7009	348147893	0	0	0	179385984	20495399	0	0	0	106531549
7010	234124878	0	0	0	178643008	144809825	0	0	0	129899480
7011	156093969	0	0	0	131327239	81181305	0	0	0	119231614
7012	25684	0	0	0	135651	21598	0	0	0	120021
7013	125272138	0	0	0	337614664	18465895	0	0	0	86958838
7014	1227072	0	0	0	8324129	4698928	0	0	0	3802063
7015	82294	0	0	0	1696869	25969	0	0	0	349462
7016	11409722	0	0	0	29281655	1237254	0	0	0	7933184
7017	2526203	0	0	0	29334429	20802947	0	0	0	62696518
7018	9398535	0	0	0	26560141	10455195	0	0	0	12707926
7019	90420833	0	0	0	238512910	92043398	0	0	0	334777833
7020	6750210	0	0	0	29964963	14043581	0	0	0	63878880
7101	5433	0	0	0	42017075	3446	0	0	0	35457011
7102	22590	0	0	0	6807043105	24372	0	0	0	7847554663
7103	456420	0	0	0	97371139	6239	0	0	0	70355126
7104	12451	0	0	0	5465726	12357	0	0	0	7408364
7105	17454	0	0	0	14816968	13968	0	0	0	19158582
7106	2753028	0	0	0	506764299	2962390	0	0	0	460219530
7107	46625	0	0	0	3149756	65368	0	0	0	1191892
7108	1089616	0	0	0	7541341913	88154	0	0	0	606838280
7109	1084	0	0	0	194876	34007	0	0	0	3889993
7110	81797	0	0	0	726781657	80836	0	0	0	1007725416
7111	1331	0	0	0	802906	11236	0	0	0	778975
7112	3648602	0	0	0	880750306	5485067	0	0	0	65321487
7113	706127	0	0	0	2758494630	367422	0	0	0	1688127848
7114	166455	0	0	0	26574086	65134	0	0	0	39001253
7115	43560	0	0	0	21622070	74834	0	0	0	74481030
7116	256944	0	0	0	16306570	3649	0	0	0	34552511
7117	7319424	0	0	0	230220586	1551775	0	0	0	107438059
7118	425324	0	0	0	3294669	3191166	0	0	0	31936484
7201	122899979	0	0	0	21624786	1486211	0	0	0	1445614
7202	321105623	0	0	0	236270697	40617945	0	0	0	194904461
7203	1019619	0	0	0	2869716	896661	0	0	0	1440096
7204	140137853	0	0	0	61145810	7490461575	0	0	0	1209945631
7205	41595469	0	0	0	36085960	56597323	0	0	0	48924611
7206	314066	0	0	0	572456	5099700	0	0	0	3138682
7207	507415286	0	0	0	163397735	860336425	0	0	0	241592591
7208	1642734580	0	0	0	432692196	894188984	0	0	0	333766112
7209	463511355	0	0	0	202864848	308109146	0	0	0	143589781
7210	1557675909	0	0	0	907694555	758476057	0	0	0	534607330
7211	135358872	0	0	0	77938141	221084585	0	0	0	85967659
7212	80104231	0	0	0	69694319	75521836	0	0	0	94728378
7213	425310278	0	0	0	143726900	664016847	0	0	0	254965888
7214	690885820	0	0	0	232079068	360717562	0	0	0	155708007
7215	87791514	0	0	0	54346641	138156417	0	0	0	91384701
7216	662541249	0	0	0	277748188	757939571	0	0	0	318021392
7217	90357887	0	0	0	78262901	149091502	0	0	0	106187327
7218	26910789	0	0	0	47305573	350800223	0	0	0	479246896
7219	455353793	0	0	0	658391979	171148554	0	0	0	311885316
7220	44287109	0	0	0	81130954	40589079	0	0	0	98177184
7221	4212509	0	0	0	8272685	29117414	0	0	0	55711303
7222	53840758	0	0	0	125943646	21302597	0	0	0	65011702
7223	11642850	0	0	0	35517674	5325848	0	0	0	16573268
7224	11297675	0	0	0	9083753	61442644	0	0	0	38587120
7225	461081755	0	0	0	248658038	129702858	0	0	0	101048200
7226	43896729	0	0	0	35653667	52798164	0	0	0	58607406
7227	58697287	0	0	0	31017154	18555341	0	0	0	9685862
7228	166082032	0	0	0	148812016	224855067	0	0	0	190871120
7229	12843429	0	0	0	23438429	16027930	0	0	0	23996316
7301	34587324	0	0	0	29785132	99635241	0	0	0	56391829
7302	203382818	0	0	0	116682949	67227024	0	0	0	68791564
7303	18886015	0	0	0	20294485	121085165	0	0	0	73212417
7304	264960109	0	0	0	379638068	199113947	0	0	0	391388654
7305	125944302	0	0	0	97809711	256293084	0	0	0	135595095
7306	436841914	0	0	0	352205307	344036274	0	0	0	275728962
7307	71383565	0	0	0	295363589	48761373	0	0	0	403627087
7308	343432986	0	0	0	483133713	282287956	0	0	0	669764212
7309	9904230	0	0	0	33610444	28292061	0	0	0	94658720
7310	73433878	0	0	0	190130180	34619505	0	0	0	114424767
7311	29796677	0	0	0	60323746	17107086	0	0	0	65808965
7312	60000202	0	0	0	109307766	42162700	0	0	0	102330766
7313	3960213	0	0	0	4317638	4571388	0	0	0	6832072
7314	76559871	0	0	0	87317383	52116228	0	0	0	68946914
7315	19508346	0	0	0	91315286	19255120	0	0	0	91435892
7316	1601671	0	0	0	4977842	2158164	0	0	0	16876123
7317	56616059	0	0	0	73421327	14710296	0	0	0	34144154
7318	940353383	0	0	0	728930628	40821941	0	0	0	403900621
7319	687996	0	0	0	8812161	441440	0	0	0	7758976
7320	40418331	0	0	0	110300333	25382586	0	0	0	105138134
7321	79136993	0	0	0	299721311	9763239	0	0	0	58967465
7322	154161277	0	0	0	281590791	16278383	0	0	0	48401817
7323	83394344	0	0	0	355694820	8679852	0	0	0	48993464
7324	23449035	0	0	0	128450768	3847838	0	0	0	40896374
7325	116409585	0	0	0	124087137	93345024	0	0	0	183359956
7326	257721578	0	0	0	751845334	158158131	0	0	0	546830121
7401	4203	0	0	0	46000	2722692	0	0	0	1585012
7402	40262	0	0	0	128440	641061	0	0	0	4242330
7403	281253491	0	0	0	500369766	23379726	0	0	0	41150342
7404	17987299	0	0	0	28818136	210639217	0	0	0	237326796
7405	1731359	0	0	0	3605005	3137721	0	0	0	7138727
7406	2257357	0	0	0	9242785	6292764	0	0	0	26756566
7407	66200096	0	0	0	59493979	17370320	0	0	0	48180627
7408	74844335	0	0	0	162783161	75600065	0	0	0	144765111
7409	49242945	0	0	0	134867851	17446537	0	0	0	66921728
7410	7803123	0	0	0	39590932	4148393	0	0	0	29968907
7411	54907558	0	0	0	177153548	25404261	0	0	0	72557497
7412	12912293	0	0	0	87358073	9663220	0	0	0	104817083
7413	4461873	0	0	0	20378992	6649114	0	0	0	25139882
7414	813228	0	0	0	4293955	205314	0	0	0	5031321
7415	7026289	0	0	0	26169888	1358923	0	0	0	17118779
7416	92262	0	0	0	1164633	28036	0	0	0	767662
7417	170655	0	0	0	1147999	426063	0	0	0	3958925
7418	4348694	0	0	0	50570399	577907	0	0	0	15498771
7419	6179358	0	0	0	42588196	4155290	0	0	0	52668652
7501	44318674	0	0	0	219698739	206454	0	0	0	1362609
7502	35934905	0	0	0	292507810	24261290	0	0	0	211200013
7503	20452037	0	0	0	37788281	7583794	0	0	0	31005989
7504	878688	0	0	0	12268623	9003462	0	0	0	101831919
7505	7009079	0	0	0	109109012	6153746	0	0	0	107901714
7506	3591380	0	0	0	44673204	1969101	0	0	0	40219011
7507	1032169	0	0	0	12920810	1346083	0	0	0	34661441
7508	871583	0	0	0	16911387	965302	0	0	0	13075300
7601	358891151	0	0	0	570738777	271982751	0	0	0	441006627
7602	105009072	0	0	0	97098113	299089399	0	0	0	316175903
7603	3941697	0	0	0	14708599	9392226	0	0	0	27073861
7604	157024681	0	0	0	299622921	57131559	0	0	0	121081756
7605	15365480	0	0	0	29734417	11161389	0	0	0	33958728
7606	383147327	0	0	0	968414681	194122352	0	0	0	489112398
7607	76784283	0	0	0	318440250	36337893	0	0	0	147194026
7608	13059324	0	0	0	60636252	6643480	0	0	0	39679945
7609	1618342	0	0	0	16281622	827006	0	0	0	11630508
7610	42955118	0	0	0	406885045	15379071	0	0	0	142091443
7611	3010550	0	0	0	15877588	991713	0	0	0	8078219
7612	24731231	0	0	0	130996322	18643471	0	0	0	97737739
7613	682036	0	0	0	11277310	7443882	0	0	0	60677362
7614	3199611	0	0	0	11244881	205786	0	0	0	1164093
7615	17674988	0	0	0	131787091	1437301	0	0	0	13109974
7616	56507459	0	0	0	267963162	18870015	0	0	0	263277421
7801	238455346	0	0	0	156637834	105134989	0	0	0	67310234
7802	6165253	0	0	0	3519607	27841585	0	0	0	11363411
7803	648230	0	0	0	1151488	395423	0	0	0	793470
7804	25333443	0	0	0	22036412	15172096	0	0	0	14216576
7805	1994	0	0	0	53539	11092	0	0	0	50403
7806	992454	0	0	0	4029708	1857017	0	0	0	4241241
7901	199281910	0	0	0	176129507	24692740	0	0	0	25312270
7902	171830	0	0	0	63075	15506773	0	0	0	7748489
7903	336534	0	0	0	648253	2317699	0	0	0	2740685
7904	20750749	0	0	0	16776055	2434841	0	0	0	3914303
7905	2381954	0	0	0	6774081	72861	0	0	0	300510
7906	18062	0	0	0	132421	96069	0	0	0	4752836
7907	2298417	0	0	0	12550741	4942948	0	0	0	20150848
8001	10504431	0	0	0	49662293	2461544	0	0	0	8724370
8002	139255	0	0	0	412046	4265235	0	0	0	3334099
8003	546886	0	0	0	2577243	1335917	0	0	0	6468088
8004	308854	0	0	0	1030645	130342	0	0	0	2046351
8005	486173	0	0	0	6462607	569459	0	0	0	4318284
8006	1806	0	0	0	86181	3760	0	0	0	35306
8007	1122750	0	0	0	7402567	282849	0	0	0	6122982
8101	2073534	0	0	0	19841863	1946825	0	0	0	11038882
8102	1185453	0	0	0	17375124	239283	0	0	0	4156860
8103	860690	0	0	0	128054295	216546	0	0	0	90310604
8104	16856559	0	0	0	43413564	7783492	0	0	0	32200529
8105	3565406	0	0	0	57246808	1501869	0	0	0	35424713
8106	2235629	0	0	0	12580388	2421339	0	0	0	15443763
8107	405782	0	0	0	2307056	182384	0	0	0	1039820
8108	29393615	0	0	0	211449222	9927723	0	0	0	127818064
8109	343043	0	0	0	9775348	236304	0	0	0	2680223
8110	258213	0	0	0	948587	69780	0	0	0	272578
8111	11028995	0	0	0	13090917	0	0	0	0	0
8112	2293486	0	0	0	34796678	5872996	0	0	0	38059071
8113	97300	0	0	0	2837494	106720	0	0	0	574758
8201	18670413	0	0	0	62121913	3309175	0	0	0	23933094
8202	15278524	0	0	0	105712877	5810744	0	0	0	79856715
8203	8762570	0	0	0	59567769	2024607	0	0	0	27235203
8204	11456366	0	0	0	74365336	5434579	0	0	0	38036466
8205	115176321	0	0	0	269679261	16314634	0	0	0	169378185
8206	8566289	0	0	0	41011076	1591464	0	0	0	10779328
8207	22155023	0	0	0	399759934	21387495	0	0	0	571568387
8208	54525185	0	0	0	44910899	2920845	0	0	0	63983988
8209	1379632	0	0	0	121909529	1389617	0	0	0	65607482
8210	2291033	0	0	0	16676724	720453	0	0	0	9578456
8211	9293662	0	0	0	57851704	3520254	0	0	0	24481442
8212	32687153	0	0	0	346308655	22753064	0	0	0	697359232
8213	2356041	0	0	0	19156575	129279	0	0	0	3386376
8214	2785903	0	0	0	24164129	578444	0	0	0	8855481
8215	15709337	0	0	0	95699221	2230389	0	0	0	22848158
8301	27874185	0	0	0	345262465	8757636	0	0	0	113048713
8302	199992597	0	0	0	856448792	55003122	0	0	0	372017142
8303	18253369	0	0	0	46310459	2421319	0	0	0	10879580
8304	2780596	0	0	0	12860684	1337354	0	0	0	8751487
8305	10475822	0	0	0	26150723	5815653	0	0	0	10406509
8306	18405636	0	0	0	83926074	1356171	0	0	0	29527955
8307	5431382	0	0	0	40503928	3655926	0	0	0	36678081
8308	11803252	0	0	0	65178147	8318842	0	0	0	102485085
8309	91947553	0	0	0	211783009	30645407	0	0	0	168348486
8310	3438137	0	0	0	20974170	705790	0	0	0	9418768
8311	17437955	0	0	0	42436220	18066230	0	0	0	57688474
8401	1319806	0	0	0	36584751	1475399	0	0	0	48805488
8402	5333999	0	0	0	23942970	7325061	0	0	0	62569096
8403	66962674	0	0	0	590278335	7174805	0	0	0	66371281
8404	1604389	0	0	0	13689812	7884599	0	0	0	57841146
8405	5241688	0	0	0	28023263	689420	0	0	0	23518615
8406	6909035	0	0	0	56965747	4021071	0	0	0	139391478
8407	57205298	0	1887480	0	801323210	178456458	0	2361723	0	2548191509
8408	146214661	0	828657	0	1324989858	86855096	0	87387956	0	1008284304
8409	338499562	0	0	0	1989674855	115944080	0	0	0	1368016962
8410	1846875	0	0	0	42516524	444052	0	0	0	15699885
8411	22456267	0	0	0	6790294148	27856095	0	0	0	12035152618
8412	24008863	0	0	0	299647853	21213066	0	0	0	377109931
8413	104445792	0	0	0	1277137885	51109631	0	0	0	1249207863
8414	116937437	0	0	0	1316927133	64477805	0	0	0	1358862035
8415	575922412	0	0	0	712772224	29897655	0	0	0	474329050
8416	3195880	0	0	0	49719540	4952028	0	0	0	84999734
8417	7600087	0	0	0	65704572	6898652	0	0	0	80044930
8418	316741962	0	0	0	1337610838	44447839	0	0	0	339605584
8419	56469748	0	0	0	514016609	40154496	0	0	0	607400386
8420	5690574	0	0	0	23337370	5588993	0	0	0	33558059
8421	95219911	0	0	0	1118854284	81336551	0	0	0	1284108504
8422	81748755	0	0	0	819387647	23777201	0	0	0	308750599
8423	10695623	0	0	0	139709614	4052753	0	0	0	144569806
8424	47499393	0	0	0	423135136	23846029	0	0	0	348915142
8425	18693680	0	3666786	0	123062366	11168067	0	634755	0	107005501
8426	27671593	0	0	0	186859147	24135909	0	0	0	123241925
8427	80749868	0	71181	0	530317472	300871864	0	11081649	0	975949305
8428	63131534	0	0	0	512940604	43039363	0	0	0	489950289
8429	227189013	0	169426	0	1032768108	394805072	0	248721	0	1641047116
8430	6805587	0	0	0	83360965	12822331	0	0	0	100059626
8431	371541779	0	0	0	1534535109	194711560	0	0	0	1592676290
8432	33529286	0	0	0	196716093	15885761	0	0	0	79826541
8433	66215200	0	0	0	509506879	30527897	0	0	0	228846561
8434	4207275	0	0	0	57116674	4113549	0	0	0	40219377
8435	216179	0	0	0	3860058	238281	0	0	0	1988299
8436	16106134	0	0	0	111914840	5178208	0	0	0	36574660
8437	1168757	0	0	0	15792919	1972775	0	0	0	59960467
8438	12713570	0	0	0	305116008	15673316	0	0	0	192061347
8439	14991973	0	0	0	114883675	11659698	0	0	0	90802968
8440	3082207	0	0	0	87692683	3407976	0	0	0	50679851
8441	12491483	0	0	0	176094413	10010173	0	0	0	169358023
8442	3605677	0	0	0	72497243	8440755	0	0	0	192096562
8443	29904402	0	0	0	614900731	44666724	0	0	0	715606799
8444	188452	0	3133	0	4930660	1672412	0	25973	0	13141408
8445	755854	0	21104	0	12589357	6697791	0	193366	0	47809439
8446	291297	0	115103	0	6302579	1703422	0	11491	0	12669432
8447	1323105	0	12075	0	29864791	4657662	0	57493	0	45592678
8448	2760193	0	0	0	61686043	5952105	0	0	0	108792243
8449	169200	0	0	0	6525301	286279	0	0	0	4140352
8450	148008866	0	0	0	504734056	14177201	0	0	0	58048851
8451	26022481	0	0	0	116791140	35906743	0	0	0	182459087
8452	5532363	0	0	0	64922060	2988874	0	0	0	34855836
8453	730544	0	0	0	9398422	1818159	0	0	0	14280786
8454	9677038	0	0	0	40077550	8441773	0	0	0	60390461
8455	4888880	0	0	0	27403969	33047979	0	0	0	131510396
8456	1851957	0	1976	0	77888427	1165395	0	90044617	0	82517646
8457	7316935	0	2574	0	166460693	12092072	0	3647	0	157929702
8458	9167771	0	34280	0	144847701	9492844	0	8629	0	87312029
8459	7708079	0	182161	0	69929242	9514243	0	80212	0	56487024
8460	3329986	0	290651	0	68521262	6809696	0	15662	0	99092336
8461	2548935	0	87333	0	35377622	2633483	0	66286	0	20298054
8462	13708593	0	209662	0	119277250	22661114	0	37209	0	140600061
8463	444266	0	76609	0	9885158	2712088	0	25027	0	28559672
8464	4600612	0	0	0	61024963	1224305	0	0	0	18496560
8465	25902858	0	1708859	0	237155847	5431163	0	82822	0	49860666
8466	29984540	0	0	0	468828135	15167600	0	0	0	388884487
8467	83033187	0	0	0	762172516	22006448	0	0	0	422288930
8468	1437101	0	0	0	40126770	1225572	0	0	0	26009306
8469	80406	0	41012	0	1965126	590973	0	83299	0	13040665
8470	5688646	0	19401566	0	150710645	1436827	0	3163661	0	73833004
8471	276388845	0	117960271	0	15974678918	173899156	0	37890961	0	9717200435
8472	17100570	0	483143	0	189759463	16705089	0	155337	0	422235929
8473	166196208	0	0	0	8600504902	65753403	0	0	0	5611901251
8474	50921436	0	0	0	243349470	104017170	0	0	0	664913814
8475	7093454	0	0	0	68113926	2936521	0	0	0	87187343
8476	8870932	0	0	0	122960749	2525584	0	0	0	95503848
8477	21697591	0	0	0	344440599	18472217	0	0	0	208174542
8478	813263	0	0	0	33351894	8387941	0	0	0	147506082
8479	58270300	0	0	0	1049194978	59089643	0	0	0	1356678969
8480	10393983	0	0	0	173248873	5488908	0	0	0	113168801
8481	144515017	0	0	0	1711762538	56185398	0	0	0	1447585066
8482	52939983	0	0	0	522167226	22371743	0	0	0	430138722
8483	139929488	0	0	0	893439333	71667452	0	0	0	626770198
8484	11388048	0	0	0	145873149	4370867	0	0	0	201511363
8485	16628326	0	0	0	248582979	20711331	0	0	0	538003925
8501	88785208	0	55596099	0	808267891	43572567	0	220677991	0	474125310
8502	11770097	0	3292448	0	146873340	110715165	0	306559	0	937769431
8503	21263013	0	0	0	208523814	37703815	0	0	0	264994672
8504	100723370	0	0	0	1354896439	42839750	0	0	0	1081837451
8505	9538895	0	0	0	82452017	8057442	0	0	0	327609010
8506	42756692	0	0	0	288181593	13459411	0	0	0	170346842
8507	160054737	0	0	0	474680259	110059465	0	0	0	374316513
8509	81027354	0	0	0	581961047	18498627	0	0	0	142402356
8510	5918518	0	0	0	121078419	678511	0	0	0	16001164
8511	34050689	0	0	0	469189367	40898665	0	0	0	517720700
8512	26431286	0	0	0	396841168	16963377	0	0	0	242744458
8513	9413640	0	0	0	74870621	1026462	0	0	0	24239532
8514	9620770	0	0	0	93154542	5014709	0	0	0	115386373
8515	11156768	0	0	0	216695839	6939982	0	0	0	165899181
8516	330827943	0	0	0	1830110207	94564736	0	0	0	682409277
8517	44085393	0	0	0	4319130501	22447806	0	0	0	2952471282
8518	66980839	0	0	0	753788062	29694288	0	0	0	629405154
8519	12332474	0	11326855	0	410699477	1739953	0	795992	0	83061338
8520	5928110	0	3705886	0	259500722	728963	0	433277	0	49994168
8521	51088803	0	14775129	0	1169787087	10911931	0	3107399	0	224884119
8522	12724788	0	0	0	187852458	7601368	0	0	0	84297859
8523	60686667	0	0	0	577092211	33532060	0	0	0	360157828
8524	111966409	0	0	0	2122201770	72489882	0	0	0	1709755350
8525	47283564	0	48836969	0	7797273242	22471032	0	47932545	0	8165124991
8526	6061296	0	0	0	375153029	917106	0	0	0	253313366
8527	83942459	0	33355769	0	1345259739	7937260	0	2317277	0	148497205
8528	181383074	0	16984177	0	2601064672	65855249	0	5347383	0	962680218
8529	40870539	0	0	0	1352751397	18162236	0	0	0	1244680334
8530	698700	0	0	0	48199797	1300606	0	0	0	71652421
8531	31036963	0	0	0	1031267092	9376826	0	0	0	596659953
8532	9660282	0	0	0	333691093	4863601	0	0	0	410076629
8533	9056066	0	0	0	149436946	3197006	0	0	0	196893824
8534	6858425	0	0	0	530215566	3167519	0	0	0	665374582
8535	6439412	0	0	0	119627987	5902848	0	0	0	156751818
8536	206167727	0	0	0	1993673915	61742134	0	0	0	1644776268
8537	8906318	0	0	0	432486157	6793234	0	0	0	388830713
8538	20245947	0	0	0	369746964	17370961	0	0	0	573035768
8539	140192425	0	0	0	572183581	17903579	0	0	0	325502194
8540	50296039	0	0	0	487610851	121664922	0	0	0	609896959
8541	8370371	0	0	0	895527626	3523217	0	0	0	906718573
8542	8943436	0	0	0	5765861351	5000361	0	0	0	3973638799
8543	21397176	0	0	0	845549026	11393761	0	0	0	1251968548
8544	332816993	0	0	0	1935063332	158554847	0	0	0	926286694
8545	11303088	0	0	0	38684661	2777986	0	0	0	32373628
8546	5508706	0	0	0	46628147	7139109	0	0	0	115556843
8547	19394046	0	0	0	51097062	3680379	0	0	0	59938102
8548	23675372	0	0	0	223313530	7230285	0	0	0	235199861
8601	548264	0	149	0	12073994	260411	0	7	0	14219102
8602	3540633	0	46	0	65623690	59403	0	2	0	573447
8603	76401	0	17	0	1201511	236876	0	1349	0	808871
8604	507448944	0	1538	0	74321360	25200	0	33	0	616587
8605	49984	0	39	0	284664	588	0	20	0	6198
8606	11518994	0	440	0	37828620	60026	0	52	0	437230
8607	46824673	0	0	0	335441938	16812621	0	0	0	242719526
8608	3063239	0	0	0	74019445	5275672	0	0	0	23576133
8609	4635237	0	31269	0	18701310	9141210	0	34851	0	35685082
8701	110334662	0	45869	0	888254714	206098498	0	594182	0	1164592755
8702	18202912	0	6407	0	253408868	23510961	0	9174	0	294407155
8703	3379669934	0	2863333	0	38305076607	1570085602	0	1157686	0	18740140316
8704	473294383	0	289206	0	4160452965	313697220	0	103447	0	1945290058
8705	11349312	0	560	0	122567619	9618405	0	556	0	66543172
8706	103799318	0	24885	0	1020482203	4421599	0	111111	0	45115175
8707	164261814	0	853731	0	288048297	8160706	0	1312447	0	61303329
8708	1975449659	0	0	0	11884807576	1107701601	0	0	0	6987868921
8709	3476828	0	0	0	37359039	1126432	0	0	0	13172685
8711	36166723	0	352513	0	769372703	9604603	0	33466	0	176161239
8712	55862241	0	4693502	0	262531358	3393663	0	225489	0	27550586
8713	7287487	0	371667	0	77339631	1164872	0	81338	0	31269980
8714	37641364	0	0	0	454399539	7864333	0	0	0	138201351
8715	17621823	0	0	0	118033717	1618806	0	0	0	19252799
8716	170352624	0	0	0	625202500	156850217	0	0	0	510246547
8804	69793	0	0	0	5647844	33811	0	0	0	15239291
8901	92510914	0	0	0	312666928	168615595	0	0	0	222516842
8902	26980	0	0	0	849680	307715	0	0	0	3600796
8903	15671755	0	222979	0	345227053	18238275	0	28758	0	594565838
8904	1274500	0	44	0	15275841	9380	0	1	0	311213
8905	272786	0	10	0	3159804	19430300	0	13	0	104720167
8906	224600	0	99	0	13268104	1000666	0	374	0	29148138
8907	3303891	0	0	0	21707308	5985741	0	0	0	65274228
9001	10447540	0	0	0	602327230	3705309	0	0	0	565723290
9002	1273730	0	0	0	132065467	614759	0	0	0	74208364
9003	1477757	0	0	0	154914460	209823	0	0	0	35191550
9004	4431596	0	44698031	0	181675241	919112	0	17725653	0	48891937
9005	2555588	0	0	0	82376356	173462	0	0	0	18558979
9006	8049089	0	0	0	362675343	2328551	0	0	0	137526577
9007	14281627	0	0	0	55358020	456562	0	0	0	28683199
9008	1225745	0	0	0	28589020	799604	0	0	0	22071894
9009	45083674	0	0	0	1121583616	18963784	0	0	0	305281713
9010	2832673	0	0	0	201504632	1654524	0	0	0	154829341
9011	470148	0	0	0	58251061	201224	0	0	0	42726759
9012	138357	0	0	0	27807499	278226	0	0	0	53719265
9013	2598932	0	0	0	336751872	642814	0	0	0	227552085
9014	3223462	0	0	0	1043527187	1753914	0	0	0	1187108519
9015	15738998	0	0	0	656393731	9257510	0	0	0	600679470
9016	176643	0	0	0	9809023	95609	0	0	0	8815830
9017	4576791	0	0	0	44277524	2376936	0	0	0	47787764
9018	53225964	0	0	0	2271613198	30394575	0	0	0	1717399750
9019	16595370	0	0	0	192272635	3307421	0	0	0	189321558
9020	953128	0	0	0	58145115	2205558	0	0	0	138477340
9021	5243029	0	0	0	820861374	9830069	0	0	0	645345052
9022	8152046	0	0	0	334344536	7102885	0	0	0	421616609
9023	2336110	0	0	0	112068026	3604407	0	0	0	143862806
9024	859149	0	0	0	54028469	2764737	0	0	0	246900289
9025	3020469	0	0	0	77885313	1330909	0	0	0	90801662
9026	6594524	0	0	0	383530852	6802339	0	0	0	590054497
9027	9884391	0	0	0	849870818	16147275	0	0	0	1291244808
9028	5296789	0	0	0	119580120	3269819	0	0	0	117176918
9029	3530883	0	0	0	143372157	2794767	0	0	0	175263567
9030	2732046	0	0	0	522501950	2279020	0	0	0	812531239
9031	10796529	0	0	0	577157530	24070073	0	0	0	743416621
9032	16917653	0	0	0	904188935	11099488	0	0	0	760009715
9033	1421835	0	0	0	176659018	2691348	0	0	0	246816091
9101	354531	0	1641570	0	291242173	61673	0	265437	0	130069567
9102	4378823	0	39933670	0	394920101	566591	0	3411719	0	85651360
9103	379522	0	1139077	0	5153112	92964	0	185639	0	4377378
9104	208247	0	294359	0	9647693	26027	0	16475	0	1088975
9105	9592468	0	21237949	0	87982784	604632	0	930799	0	17080165
9106	932512	0	2947806	0	15376207	84229	0	76707	0	5966686
9107	908599	0	4013593	0	27433774	238014	0	2490890	0	8589885
9108	21243	0	701571	0	2950000	9864	0	50084	0	2339967
9109	140054	0	912856	0	2508454	6632	0	15391	0	506536
9110	36161	0	0	0	7492652	13991	0	0	0	3631509
9111	72105	0	0	0	2698918	7039	0	0	0	930947
9112	22515	0	0	0	322986	3860	0	0	0	137715
9113	113201	0	0	0	30217760	27001	0	0	0	2321342
9114	198798	0	0	0	18646337	25149	0	0	0	10062712
9201	2445287	0	45730	0	35533857	1128967	0	11512	0	18866122
9202	1681446	0	606573	0	36301677	197422	0	68263	0	14545289
9203	24023	0	7243	0	330263	19965	0	534	0	1140880
9204	96726	0	279596	0	1940201	16080	0	34100	0	1347090
9205	608916	0	1040058	0	35279492	115891	0	90425	0	14952020
9206	2732273	0	1940284	0	23013130	282433	0	33905	0	6920559
9207	5518020	0	851760	0	121081289	541906	0	62666	0	20951907
9208	654049	0	7112067	0	5039022	210290	0	728698	0	3025116
9209	3949730	0	0	0	60623728	612873	0	0	0	21720224
9303	226262	0	48431	0	46139171	25474	0	5169	0	23364364
9304	756690	0	873688	0	15013130	201956	0	107951	0	10855604
9305	273408	0	0	0	12210917	89434	0	0	0	15675441
9306	9832109	0	0	0	67046502	5767259	0	0	0	46280456
9401	449280265	0	0	0	2288929919	53045124	0	0	0	496859369
9402	7713876	0	0	0	103982513	4870068	0	0	0	82961189
9403	1513690932	0	0	0	3330565863	201359611	0	0	0	878454020
9404	44652411	0	0	0	244013943	11958646	0	0	0	80856681
9405	260638943	0	0	0	1070523664	29004338	0	0	0	423037556
9406	39822669	0	0	0	116714560	54973153	0	0	0	164841006
9501	18487984	0	0	0	92939159	952428	0	0	0	6999289
9502	28097164	0	0	0	165447809	2310680	0	0	0	22894013
9503	248578425	0	0	0	1681774657	26036367	0	0	0	327710814
9504	72413838	0	0	0	1207234695	20048248	0	0	0	520064964
9505	59143449	0	0	0	311155200	5968135	0	0	0	71460527
9506	155662868	0	0	0	900489958	16008881	0	0	0	347623561
9507	4906282	0	0	0	77182209	1397077	0	0	0	39499263
9508	5516269	0	0	0	45990891	3150297	0	0	0	27968437
9601	235000	0	0	0	2365973	21150	0	0	0	1011869
9602	1212544	0	0	0	13412001	722258	0	0	0	6756750
9603	41503149	0	0	0	269116714	12109559	0	0	0	153200236
9604	86208	0	0	0	685061	129737	0	0	0	3848723
9605	3453022	0	0	0	26037988	270876	0	0	0	3387825
9606	2070167	0	0	0	26520648	1296430	0	0	0	23763059
9607	2432939	0	0	0	25594610	1405306	0	0	0	29212593
9608	21095831	0	0	0	235308661	7201327	0	0	0	188270696
9609	10858606	0	0	0	42782528	1442018	0	0	0	12271993
9610	2681039	0	0	0	11085273	706651	0	0	0	2762501
9611	924854	0	0	0	16204893	288948	0	0	0	5893190
9612	6523736	0	0	0	125490680	4504527	0	0	0	129424785
9613	4929869	0	0	0	39263243	547916	0	0	0	10893224
9614	149111	0	0	0	3267940	29643	0	0	0	2187326
9615	5614652	0	0	0	46281622	539652	0	0	0	12567356
9616	4041708	0	0	0	70848830	1064073	0	0	0	12147683
9617	5059177	0	0	0	22679359	242438	0	0	0	3866855
9618	1047489	0	0	0	12787182	451139	0	0	0	15088566
9701	2514670	0	0	0	1847557924	572153	0	0	0	2194889799
9702	323142	0	0	0	65883779	128602	0	0	0	89382265
9703	712957	0	0	0	232039286	578980	0	0	0	320309292
9704	68564	0	0	0	48452026	289001	0	0	0	53515581
9705	3756876	0	0	0	214730050	395263	0	0	0	138480162
9706	2075695	0	0	0	599637205	6590706	0	0	0	1963402163
9999	0	0	0	0	21627366701	0	0	0	0	17518572131

## Sheet: Comtrade2004
Commodity Code	Import(Weight)	Import(Area)	Import(Quantity Number)	Import(Volume)	Import(Trade Value)	Export(Weight)	Export(Area)	Export(Quantity Number)	Export(Volume)	Export(Trade Value)
101	2574458	0	5602	0	659628475	2791268	0	7572	0	607471996
102	1246632	0	4151	0	3134219	0	0	0	0	0
103	31076772	0	402053	0	52968856	7471513	0	77699	0	13713981
104	385	0	6	0	14797	476480	0	12732	0	1380097
105	1077762	0	6673376	0	11280713	10717312	0	33997160	0	145655339
106	912032	0	0	0	20721998	514720	0	0	0	17655556
201	203544972	0	0	0	939228771	3366647	0	0	0	24587009
202	103078471	0	0	0	279442168	3203540	0	0	0	12458575
203	389983827	0	0	0	927880556	86811716	0	0	0	172073999
204	116854278	0	0	0	522444361	83928134	0	0	0	378883096
205	6000	0	0	0	6925	1576458	0	0	0	5036106
206	58427925	0	0	0	63163065	20956103	0	0	0	10410268
207	410071456	0	0	0	1383867053	268688627	0	0	0	357705865
208	8877231	0	0	0	15554266	2423895	0	0	0	13962899
209	26510717	0	0	0	23560853	8308577	0	0	0	3937904
210	312277608	0	0	0	1039981868	14225205	0	0	0	77383549
301	2472521	0	0	0	37063942	927053	0	0	0	16346399
302	110591665	0	0	0	307029620	87873322	0	0	0	368448022
303	80419175	0	0	0	197932877	186358253	0	0	0	244235464
304	173334924	0	0	0	815369215	59311807	0	0	0	210391647
305	4540996	0	0	0	24205801	8416559	0	0	0	86828434
306	48206898	0	0	0	358477231	60678203	0	0	0	405283047
307	13595315	0	0	0	59092386	40502131	0	0	0	179629682
401	71143579	0	0	0	62729018	336026006	0	0	0	254553968
402	94073336	0	0	0	139717448	220465537	0	0	0	475084557
403	269741746	0	0	0	382277054	24976297	0	0	0	47498456
404	27655330	0	0	0	34185947	67385267	0	0	0	75607539
405	120086753	0	0	0	534916605	34791885	0	0	0	108542979
406	373134204	0	0	0	1620951996	93892030	0	0	0	369123235
407	41304290	0	0	0	77846403	10231638	0	0	0	48208510
408	20442879	0	0	0	57744451	4951359	0	0	0	10678979
409	29586641	0	0	0	73842316	1158909	0	0	0	5683205
410	285734	0	0	0	1747410	58257	0	0	0	1159056
501	55030	0	0	0	1523694	75	0	0	0	27905
502	1324799	0	0	0	14575806	989457	0	0	0	10891378
503	97818	0	0	0	860272	74471	0	0	0	544041
504	4659816	0	0	0	17723382	3588914	0	0	0	37622299
505	3772210	0	0	0	8358298	1506980	0	0	0	4011631
506	53292286	0	0	0	27836747	2242088	0	0	0	1264748
507	2529788	0	0	0	1520159	3909	0	0	0	20284
508	2625967	0	0	0	2465582	7144175	0	0	0	7726169
509	25490	0	0	0	961945	48566	0	0	0	878948
510	5179	0	0	0	289749	3269	0	0	0	45605
511	62709338	0	0	0	44652844	44656446	0	0	0	28746754
601	25414546	0	0	0	92577601	10014109	0	0	0	13851963
602	140731040	0	0	0	467354837	13396499	0	0	0	28622216
603	239131970	0	0	0	1091680992	5779354	0	0	0	34904818
604	11361383	0	0	0	47826646	8187630	0	0	0	4426366
701	383208487	0	0	0	186473814	217856802	0	0	0	105326524
702	393141193	0	0	0	589807958	5071873	0	0	0	9749972
703	312265455	0	0	0	178473200	11083569	0	0	0	12215738
704	176436688	0	0	0	186089905	4375982	0	0	0	5537224
705	191584104	0	0	0	235111486	5466018	0	0	0	12953472
706	72758090	0	0	0	67542668	23013828	0	0	0	11437464
707	106810634	0	0	0	118710324	2836031	0	0	0	4262760
708	47259450	0	0	0	143491497	25591158	0	0	0	12246199
709	439977586	0	0	0	961648389	3742707	0	0	0	13230747
710	645652597	0	0	0	359066323	100917288	0	0	0	71801733
711	11840140	0	0	0	14157343	1512951	0	0	0	3184414
712	30388807	0	0	0	68844997	2661883	0	0	0	8430882
713	170583409	0	0	0	98872164	422368283	0	0	0	105238987
714	33345017	0	0	0	35028526	303075	0	0	0	1464082
801	39220957	0	0	0	113362535	3284270	0	0	0	9066760
802	40931834	0	0	0	173125156	2789450	0	0	0	13355100
803	857521647	0	0	0	569869945	6317935	0	0	0	6316661
804	143339236	0	0	0	198509379	14540814	0	0	0	20762747
805	834226212	0	0	0	623441928	38890091	0	0	0	30729180
806	337661048	0	0	0	616059484	10714884	0	0	0	22461230
807	210153265	0	0	0	165402896	12475089	0	0	0	12022936
808	671714146	0	0	0	716523703	25578816	0	0	0	24199713
809	175513747	0	0	0	280361253	1740382	0	0	0	3863424
810	101710110	0	0	0	296397419	2138092	0	0	0	6800588
811	59991542	0	0	0	96346057	3297925	0	0	0	8348856
812	19088840	0	0	0	17963146	1322209	0	0	0	2019837
813	30886557	0	0	0	128132743	3629011	0	0	0	8079467
814	549819	0	0	0	1338357	193227	0	0	0	933940
901	163995049	0	0	0	335116758	4865150	0	0	0	48303162
902	156438439	0	0	0	292876579	28580712	0	0	0	259319766
903	5760	0	0	0	21898	4850	0	0	0	22391
904	12358566	0	0	0	31822131	1371642	0	0	0	7733575
905	111527	0	0	0	13505979	45974	0	0	0	383398
906	1587003	0	0	0	2589519	54584	0	0	0	312517
907	291543	0	0	0	877284	32608	0	0	0	278600
908	1174789	0	0	0	5063641	69066	0	0	0	713420
909	11518793	0	0	0	11305384	478266	0	0	0	1586874
910	25171030	0	0	0	45486413	5651312	0	0	0	17877687
1001	794430295	0	0	0	174432164	2531047919	0	0	0	382919363
1002	2214806	0	0	0	609090	77573	0	0	0	54227
1003	83184400	0	0	0	18300526	685739525	0	0	0	111940053
1004	31099887	0	0	0	5745183	87935259	0	0	0	12517439
1005	1268877664	0	0	0	306282542	19693465	0	0	0	8963316
1006	711910076	0	0	0	381820995	52068753	0	0	0	56754936
1007	7431754	0	0	0	2116811	2101	0	0	0	4062
1008	39119771	0	0	0	13948443	149946	0	0	0	313529
1101	58439239	0	0	0	25706138	95132104	0	0	0	36841760
1102	15615642	0	0	0	9924012	6215571	0	0	0	3340009
1103	22474842	0	0	0	10317253	14689697	0	0	0	6033773
1104	40268085	0	0	0	18921789	105683057	0	0	0	57713213
1105	36374415	0	0	0	48223448	11672234	0	0	0	10876866
1106	2612184	0	0	0	5531100	806550	0	0	0	1604877
1107	21299262	0	0	0	16808594	416667029	0	0	0	160601737
1108	132012861	0	0	0	77412415	7512135	0	0	0	7311121
1109	15097625	0	0	0	24042919	6597339	0	0	0	5608095
1201	731365409	0	0	0	237599309	2617776	0	0	0	1675082
1202	102373077	0	0	0	84957056	1181587	0	0	0	2012173
1203	114433	0	0	0	121493	2579	0	0	0	15588
1204	5062255	0	0	0	4396966	36295677	0	0	0	15812889
1205	198060162	0	0	0	62096881	100993143	0	0	0	33584229
1206	51327765	0	0	0	22563159	837815	0	0	0	470550
1207	79644709	0	0	0	33619167	11270305	0	0	0	5974235
1208	9282404	0	0	0	10036710	5335900	0	0	0	2992176
1209	23336090	0	0	0	144683963	4765215	0	0	0	54582016
1210	1660595	0	0	0	9808356	1340898	0	0	0	8147711
1211	9729353	0	0	0	47943857	595073	0	0	0	7713720
1212	24528313	0	0	0	26569090	1415110	0	0	0	6384528
1213	157665063	0	0	0	17669311	968665	0	0	0	519579
1214	22760266	0	0	0	8868135	1494671	0	0	0	754886
1301	10790754	0	0	0	29839644	5790473	0	0	0	26634966
1302	24258478	0	0	0	109278548	8067911	0	0	0	53896510
1401	12694335	0	0	0	10413727	64793	0	0	0	1074711
1402	23918	0	0	0	19952	58020	0	0	0	51559
1403	567435	0	0	0	549523	8466	0	0	0	74930
1404	95193202	0	0	0	20041042	825083	0	0	0	1196134
1501	30963118	0	0	0	22272439	9486621	0	0	0	5741722
1502	54198372	0	0	0	27009636	33461985	0	0	0	16791872
1503	1247289	0	0	0	1464450	12284859	0	0	0	4937540
1504	85551541	0	0	0	46874704	3222836	0	0	0	25091126
1505	7993836	0	0	0	17982927	7649462	0	0	0	40485778
1506	288020	0	0	0	848285	2620274	0	0	0	1816140
1507	133543864	0	0	0	91554051	20386192	0	0	0	14264868
1508	6622176	0	0	0	9564566	354912	0	0	0	884613
1509	105976179	0	0	0	191732858	4081484	0	0	0	16366258
1510	989164	0	0	0	2024694	115060	0	0	0	304063
1511	742797633	0	0	0	342785153	47533248	0	0	0	38217407
1512	84731011	0	0	0	61150634	5414055	0	0	0	5677426
1513	97562126	0	0	0	68470897	874412	0	0	0	1306181
1514	99490207	0	0	0	81645156	82548315	0	0	0	71143354
1515	90286413	0	0	0	50891792	14056235	0	0	0	30040323
1516	33575031	0	0	0	99119569	45906827	0	0	0	56548581
1517	38959369	0	0	0	64069557	65623536	0	0	0	140017034
1518	7244594	0	0	0	9929274	15338914	0	0	0	23807760
1520	30734472	0	0	0	22513087	791877	0	0	0	425344
1521	1262803	0	0	0	5385244	283656	0	0	0	1904650
1522	43478	0	0	0	50220	574148	0	0	0	558190
1601	64377972	0	0	0	245498001	5396369	0	0	0	15781852
1602	499981848	0	0	0	1456908616	41102292	0	0	0	197464931
1603	1425457	0	0	0	5659872	775522	0	0	0	5190093
1604	210159272	0	0	0	621975799	19959409	0	0	0	86691436
1605	55014148	0	0	0	351735787	5246456	0	0	0	37436998
1701	1403161636	0	0	0	947929903	804430110	0	0	0	309085827
1702	284900960	0	0	0	158455349	96718759	0	0	0	76329155
1703	616112437	0	0	0	68317056	40977767	0	0	0	11561194
1704	117948404	0	0	0	390207406	69724619	0	0	0	299549084
1801	161042483	0	0	0	275776653	8681854	0	0	0	13634683
1802	1367177	0	0	0	134165	649105	0	0	0	219014
1803	17722985	0	0	0	45176367	12548472	0	0	0	28741125
1804	45141811	0	0	0	152819978	9352221	0	0	0	38279106
1805	6959182	0	0	0	21688999	10918007	0	0	0	31069302
1806	343391796	0	0	0	939586080	115996582	0	0	0	495965561
1901	187662267	0	0	0	430991631	123590013	0	0	0	223448550
1902	252687289	0	0	0	334197456	17662351	0	0	0	41813969
1903	2367101	0	0	0	1439302	128294	0	0	0	263265
1904	64488374	0	0	0	167455124	156271674	0	0	0	520121992
1905	602706814	0	0	0	1456893944	287661113	0	0	0	820131259
2001	44672537	0	0	0	59028652	5409280	0	0	0	16010294
2002	366888321	0	0	0	286987954	3715290	0	0	0	4424786
2003	11692697	0	0	0	19828642	374187	0	0	0	249279
2004	413159821	0	0	0	341599784	31342369	0	0	0	52577167
2005	330245593	0	0	0	399211800	61735590	0	0	0	141280699
2006	9911315	0	0	0	30338786	656627	0	0	0	1447591
2007	42520505	0	0	0	86935846	12549232	0	0	0	37306450
2008	261639824	0	0	0	371120936	23689506	0	0	0	54726946
2009	1439684224	0	0	0	672489208	62381056	0	0	0	74443135
2101	23724953	0	0	0	174159053	23070431	0	0	0	161549788
2102	29395223	0	0	0	37256606	19408302	0	0	0	58438773
2103	287732997	0	0	0	445564380	83365034	0	0	0	231424390
2104	33746126	0	0	0	89102203	26396321	0	0	0	67985718
2105	89179787	0	0	0	257151656	53562504	0	0	0	87625988
2106	197998097	0	0	0	886625860	137012223	0	0	0	696421142
2201	582560540	0	0	574488931	170264272	53075098	0	0	48154046	25392418
2202	544844332	0	0	807488844	677132593	317779963	0	0	327758839	265844805
2203	724690845	0	0	714000486	573188396	452248116	0	0	432598357	571819389
2204	1725791120	0	0	1615248997	5283080610	28180897	0	0	22788528	219881676
2205	16737525	0	0	16109764	23545748	283261	0	0	100632	782852
2206	34687218	0	0	26862166	54104010	25333764	0	0	19442847	35422310
2207	99391024	0	0	247076176	73017861	160175235	0	0	208079716	108071681
2208	161903781	0	0	132128842	813038692	766924610	0	0	330385863	5023791877
2209	12926407	0	0	14186900	19501349	4499323	0	0	3933511	3140905
2301	174914350	0	0	0	111813881	23895234	0	0	0	12582158
2302	88337582	0	0	0	13135035	10078480	0	0	0	2248314
2303	441868756	0	0	0	70891145	77096806	0	0	0	14577565
2304	1755369455	0	0	0	472233067	8820552	0	0	0	3129418
2305	7349056	0	0	0	1768041	3	0	0	0	372
2306	1318934864	0	0	0	159447833	137365560	0	0	0	28684848
2307	0	0	0	0	0	2	0	0	0	2968
2308	416321815	0	0	0	48512433	31220879	0	0	0	5847723
2309	1555460033	0	0	0	793316295	437030486	0	0	0	511541529
2401	120680328	0	0	0	390808069	12253426	0	0	0	48289701
2402	6651883	0	0	0	361015563	41741386	0	0	0	1166330761
2403	10907785	0	0	0	59625196	14478245	0	0	0	187892460
2501	232169647	0	0	0	26712228	716005017	0	0	0	49631791
2502	23448	0	0	0	48925	4362	0	0	0	6358
2503	48947158	0	0	0	4959137	706617	0	0	0	1876366
2504	19117136	0	0	0	16268786	4210271	0	0	0	7198301
2505	332849729	0	0	0	25780978	513675785	0	0	0	18175747
2506	1177571	0	0	0	1457653	1969030	0	0	0	1323937
2507	126669329	0	0	0	19412888	2924523336	0	0	0	347924781
2508	315152838	0	0	0	62656232	88145624	0	0	0	46657035
2509	5828303	0	0	0	903523	40971515	0	0	0	3888321
2510	11382093	0	0	0	2725203	36372	0	0	0	45375
2511	63794251	0	0	0	4946619	3652070	0	0	0	1516710
2512	35187603	0	0	0	9670663	2113140	0	0	0	1363739
2513	33032493	0	0	0	5547888	1229464	0	0	0	2045201
2514	32458457	0	0	0	12863558	3742366	0	0	0	1086277
2515	29983208	0	0	0	26669098	2367364	0	0	0	370665
2516	2871806337	0	0	0	108739504	6126790	0	0	0	2854662
2517	1333135407	0	0	0	40020459	12294323698	0	0	0	101680976
2518	170747520	0	0	0	6719878	25562431	0	0	0	2444638
2519	93724971	0	0	0	34078213	25039211	0	0	0	33313370
2520	291217773	0	0	0	30434531	54323439	0	0	0	22677259
2521	9858279	0	0	0	1375680	236559963	0	0	0	6336379
2522	26395192	0	0	0	7623892	743877628	0	0	0	26450163
2523	575773998	0	0	0	58793329	363464046	0	0	0	73849683
2524	2149697	0	0	0	191059	11	0	0	0	2714
2525	19496115	0	0	0	4655454	8559189	0	0	0	6758821
2526	68214010	0	0	0	21126271	3570054	0	0	0	2168799
2528	4251816	0	0	0	1998720	41178	0	0	0	87783
2529	115408374	0	0	0	17012184	3223286	0	0	0	1340481
2530	718149541	0	0	0	48072499	350109369	0	0	0	39946926
2601	15301906269	0	0	0	588968111	213421	0	0	0	391316
2602	2526429	0	0	0	2056436	136988	0	0	0	635563
2603	248884	0	0	0	1039205	48197	0	0	0	153586
2604	21453	0	0	0	60549	1728051	0	0	0	11702998
2605	176970	0	0	0	8508190	1890	0	0	0	19284
2606	126730726	0	0	0	31924128	6816003	0	0	0	1164003
2607	242104	0	0	0	263079	26189	0	0	0	85291
2608	260132	0	0	0	795900	325621	0	0	0	366508
2609	889	0	0	0	16202	147	0	0	0	1710
2610	130950654	0	0	0	8553686	621563	0	0	0	738725
2611	23	0	0	0	14401	20665	0	0	0	131367
2612	76592	0	0	0	1880876	0	0	0	0	0
2613	19815873	0	0	0	219318585	180590	0	0	0	2865334
2614	423121211	0	0	0	57620430	42106	0	0	0	435034
2615	35134128	0	0	0	22791885	526174	0	0	0	670574
2616	558864	0	0	0	138796710	13169	0	0	0	1312321
2617	939	0	0	0	13815	265032	0	0	0	697647
2618	148145597	0	0	0	4307967	49468843	0	0	0	3418586
2619	245051741	0	0	0	109690915	107462	0	0	0	61538
2620	29116568	0	0	0	736837328	32333069	0	0	0	101198979
2621	336059180	0	0	0	15921946	33938314	0	0	0	17428432
2701	36880133640	0	0	0	2483786740	660099575	0	0	0	75755271
2702	5123002	0	0	0	1259271	3295102	0	0	0	489929
2703	563534178	0	0	0	58169067	32400903	0	0	0	6496890
2704	1044530197	0	0	0	275870801	199761596	0	0	0	34713828
2706	9281221	0	0	0	2340971	6517867	0	0	0	3065306
2707	1169312128	0	0	0	468891953	488234011	0	0	0	274203675
2708	6198954	0	0	0	3074269	25912170	0	0	0	8965662
2709	56128686256	0	0	0	15565056503	61219327834	0	0	0	17310299985
2710	24811973402	0	0	0	8596752806	0	0	0	0	10047259531
2711	6009841124	0	0	0	1738913155	3878871198	0	0	0	2858773758
2712	33697199	0	0	0	31393834	73254846	0	0	0	46425814
2713	1185012710	0	0	0	123622949	179036261	0	0	0	31717809
2714	94882127	0	0	0	14610041	165445027	0	0	0	29920661
2715	246229117	0	0	0	42446658	335125458	0	0	0	53944021
2716	2646039548	2646039548	0	0	673912114	1371584640	1371584640	0	0	283726272
2801	8349863	0	0	0	14084163	2344014	0	0	0	6515926
2802	665092	0	0	0	748276	1386920	0	0	0	844897
2803	18691524	0	0	0	25935047	68417298	0	0	0	67762145
2804	143914875	0	0	0	264877439	15880536	0	0	0	59221411
2805	10052104	0	0	0	26191811	141460	0	0	0	2641592
2806	824581	0	0	0	1640168	15745925	0	0	0	4123023
2807	430594608	0	0	0	12658930	32285928	0	0	0	5223497
2808	3955548	0	0	0	3166820	5437407	0	0	0	1272561
2809	172403128	0	0	0	59502080	10860251	0	0	0	8134654
2810	11230021	0	0	0	6498129	211576	0	0	0	293990
2811	64151828	0	0	0	98610228	79682206	0	0	0	143027210
2812	14818478	0	0	0	16975806	419461	0	0	0	4698929
2813	5347661	0	0	0	1895512	1092490	0	0	0	4661517
2814	44294845	0	0	0	13922925	262104629	0	0	0	67500290
2815	328797565	0	0	0	36236820	174095	0	0	0	699831
2816	12228364	0	0	0	7722097	363715	0	0	0	447027
2817	8489844	0	0	0	11809176	9165967	0	0	0	15252630
2818	323269893	0	0	0	116255619	11995811	0	0	0	13916675
2819	4097016	0	0	0	6709190	59347	0	0	0	149938
2820	5762754	0	0	0	2960883	2619881	0	0	0	1686180
2821	44955224	0	0	0	42213953	9354880	0	0	0	18689843
2822	547433	0	0	0	14119014	1129880	0	0	0	36034981
2823	10781622	0	0	0	23454345	1264655	0	0	0	4499830
2824	5028022	0	0	0	7486569	33766033	0	0	0	13575782
2825	18066894	0	0	0	71753370	6391001	0	0	0	52466335
2826	11741074	0	0	0	15758370	5024112	0	0	0	12300138
2827	81826357	0	0	0	63681263	45713454	0	0	0	39428095
2828	13839446	0	0	0	14201712	22406850	0	0	0	13492230
2829	3784908	0	0	0	5725962	1419586	0	0	0	8866275
2830	7298165	0	0	0	7917254	695408	0	0	0	1076635
2831	102131942	0	0	0	6342513	4192	0	0	0	30954
2832	12323129	0	0	0	3411164	48702254	0	0	0	9055498
2833	148395563	0	0	0	41188269	18688418	0	0	0	11758663
2834	44095820	0	0	0	13746242	2893028	0	0	0	5849565
2835	191434960	0	0	0	94900896	50209184	0	0	0	53094355
2836	224766822	0	0	0	64519613	57276529	0	0	0	65355917
2837	6525346	0	0	0	5733858	34375	0	0	0	119358
2838	7753335	0	0	0	12529389	544920	0	0	0	3143696
2839	37957809	0	0	0	20197423	11828142	0	0	0	10046302
2840	30051873	0	0	0	11148133	1719996	0	0	0	5049577
2841	26198821	0	0	0	19104602	5065942	0	0	0	6193523
2842	6621109	0	0	0	10317490	71591072	0	0	0	26615762
2843	260228	0	0	0	72674168	1073389	0	0	0	600391138
2844	2280093	0	0	0	741683016	2773256	0	0	0	132484666
2845	21556	0	0	0	4117700	20801	0	0	0	3047356
2846	3111775	0	0	0	17855063	1207827	0	0	0	13202725
2847	25946031	0	0	0	10937240	4045074	0	0	0	2014263
2848	76380	0	0	0	1503707	10192	0	0	0	108428
2849	36864801	0	0	0	63558894	426647	0	0	0	5331384
2850	693013	0	0	0	12298150	260529	0	0	0	9573893
2851	1963261	0	0	0	8733974	948790	0	0	0	13598917
2901	188016484	0	0	0	130569554	1731903636	0	0	0	1136249974
2902	686263249	0	0	0	571051758	1159728949	0	0	0	806037086
2903	365408821	0	0	0	345923768	130385793	0	0	0	232805331
2904	39753512	0	0	0	53717447	23813417	0	0	0	43995395
2905	417975951	0	0	0	342359583	194779595	0	0	0	184972240
2906	6751359	0	0	0	33541259	3875456	0	0	0	30563657
2907	146389642	0	0	0	182886253	32864948	0	0	0	142248809
2908	2556959	0	0	0	15167375	10068693	0	0	0	38775017
2909	158858423	0	0	0	450904017	26014570	0	0	0	51170207
2910	79810861	0	0	0	88808590	1984529	0	0	0	5074393
2911	276082	0	0	0	2110304	116762	0	0	0	526910
2912	21434951	0	0	0	70839655	33912574	0	0	0	88640281
2913	349648	0	0	0	11841105	11080	0	0	0	981752
2914	262000286	0	0	0	274037915	55885980	0	0	0	162984008
2915	304910468	0	0	0	295320573	282162129	0	0	0	349276557
2916	250603592	0	0	0	305545245	59825482	0	0	0	239611785
2917	288405406	0	0	0	286290900	411921569	0	0	0	343533032
2918	86162075	0	0	0	194711506	39533648	0	0	0	207510913
2919	11166244	0	0	0	26236783	24256483	0	0	0	60985848
2920	20324351	0	0	0	32295059	2539350	0	0	0	12484515
2921	80786960	0	0	0	331435735	311407984	0	0	0	293003192
2922	110814424	0	0	0	1090468903	88615313	0	0	0	416233173
2923	17409581	0	0	0	39647387	16182207	0	0	0	33156367
2924	36016198	0	0	0	215056760	36634115	0	0	0	202621415
2925	2651319	0	0	0	27920736	24164525	0	0	0	79952591
2926	5221598	0	0	0	22313745	74960487	0	0	0	280230932
2927	3486726	0	0	0	13102684	1221996	0	0	0	7340786
2928	1849306	0	0	0	17240184	1684519	0	0	0	27638486
2929	38449749	0	0	0	90807966	6496487	0	0	0	22533722
2930	25546955	0	0	0	1018196960	10781588	0	0	0	898840431
2931	16000655	0	0	0	62937290	146015147	0	0	0	345435458
2932	17904687	0	0	0	1329682247	13188755	0	0	0	214212515
2933	96356624	0	0	0	2158165154	48707021	0	0	0	1502642891
2934	4889787	0	0	0	1296757605	10134281	0	0	0	1069116021
2935	3304438	0	0	0	588068347	901941	0	0	0	192267111
2936	20489631	0	0	0	141762944	2655431	0	0	0	78862342
2937	319666	0	0	0	97264021	176725	0	0	0	472285130
2938	691572	0	0	0	4693821	174678	0	0	0	10585575
2939	480387	0	0	0	147392579	0	0	0	0	41929648
2940	11569745	0	0	0	29995465	6708605	0	0	0	18252825
2941	7422655	0	0	0	385574414	5531210	0	0	0	257622183
2942	1710187	0	0	0	22908365	577754	0	0	0	61282594
3001	272496	0	0	0	19546811	213310	0	0	0	31079120
3002	6957588	0	0	0	1603907407	7367160	0	0	0	910485924
3003	12282978	0	0	0	363186777	23354465	0	0	0	352972904
3004	364211239	0	0	0	12799797515	244774221	0	0	0	19306839135
3005	15054903	0	0	0	292954165	15580471	0	0	0	474019369
3006	8208359	0	0	0	360229212	3629583	0	0	0	657406943
3101	32862128	0	0	0	8616085	8390802	0	0	0	8375543
3102	1731104187	0	0	0	327259040	196778759	0	0	0	44215587
3103	207398235	0	0	0	41862000	451638	0	0	0	265759
3104	227105189	0	0	0	42934365	1252296	0	0	0	1809100
3105	1041295075	0	0	0	222801146	95075133	0	0	0	47062203
3201	1912112	0	0	0	3278150	192935	0	0	0	2794936
3202	1754931	0	0	0	4476934	35656544	0	0	0	38220900
3203	2939964	0	0	0	23435670	1517973	0	0	0	18451677
3204	59585031	0	0	0	400057042	75251644	0	0	0	499454007
3205	794893	0	0	0	6394239	558196	0	0	0	18322630
3206	167124850	0	0	0	247362252	236282744	0	0	0	503536245
3207	26254159	0	0	0	78069785	14367842	0	0	0	194242067
3208	75226197	0	0	0	320427959	170605918	0	0	0	538076120
3209	94514689	0	0	0	208211624	79920262	0	0	0	157904540
3210	4081421	0	0	0	19808634	9354511	0	0	0	38166776
3211	3236990	0	0	0	4816155	4437444	0	0	0	13712023
3212	7569145	0	0	0	69636694	8282323	0	0	0	144640252
3213	25260041	0	0	0	21479249	6202723	0	0	0	62316949
3214	82983662	0	0	0	221122941	56456660	0	0	0	154798833
3215	84784577	0	0	0	576136926	76611957	0	0	0	646977307
3301	14227294	0	0	0	170480062	6587874	0	0	0	109370964
3302	46605174	0	0	0	841926148	63327051	0	0	0	668516503
3303	29147558	0	0	0	776430937	26086579	0	0	0	503879465
3304	108894868	0	0	0	1413137517	53245352	0	0	0	1128449340
3305	211576082	0	0	0	454076833	103199451	0	0	0	512021328
3306	24118305	0	0	0	128791858	96181592	0	0	0	448022387
3307	154474391	0	0	0	486491647	199249383	0	0	0	948048055
3401	166418896	0	0	0	350748068	127604343	0	0	0	274137783
3402	515711573	0	0	0	792052160	835225363	0	0	0	1133677083
3403	54072542	0	0	0	112955114	63372425	0	0	0	181445465
3404	42598499	0	0	0	74183172	22718203	0	0	0	45855189
3405	35480154	0	0	0	83589635	23280624	0	0	0	83338423
3406	58991009	0	0	0	145229483	12469964	0	0	0	63268790
3407	4517749	0	0	0	16302143	1469358	0	0	0	5815732
3501	7506092	0	0	0	33041071	6329187	0	0	0	30437442
3502	6826450	0	0	0	35412233	2077185	0	0	0	15638335
3503	14285289	0	0	0	75191733	0	0	0	0	0
3504	5109731	0	0	0	34716480	14104023	0	0	0	80026521
3505	113813626	0	0	0	116729238	22812980	0	0	0	43416424
3506	201041320	0	0	0	232273401	78543287	0	0	0	264022700
3507	9609873	0	0	0	135975016	3334786	0	0	0	157039227
3604	16242004	0	0	0	33219311	52116	0	0	0	1874499
3605	1769374	0	0	0	8071151	34475	0	0	0	436154
3606	3020564	0	0	0	7101827	29351182	0	0	0	31363056
3701	35985945	0	0	0	312620029	20956763	0	0	0	235474407
3702	12581733	0	0	0	357036461	15376215	0	0	0	430202006
3703	13195405	0	0	0	80942494	59865460	0	0	0	334810794
3704	56771	0	0	0	2722129	10764417	0	0	0	3701419
3705	1264286	0	0	0	22906792	274401	0	0	0	76905305
3706	959957	0	0	0	21339214	711390	0	0	0	37227903
3707	38103601	0	0	0	394886644	21541030	0	0	0	296424484
3801	12950849	0	0	0	28437742	13967558	0	0	0	33769757
3802	190753016	0	0	0	41744977	30195401	0	0	0	51545383
3803	18799336	0	0	0	9027680	171151	0	0	0	431419
3804	42266593	0	0	0	10172047	510357	0	0	0	1303533
3805	2617230	0	0	0	2416214	184272	0	0	0	585683
3806	42492621	0	0	0	58253230	9629762	0	0	0	20625672
3807	53903388	0	0	0	14585904	1277120	0	0	0	1694224
3808	96666353	0	0	0	723214718	160577773	0	0	0	1152062817
3809	212521971	0	0	0	100210433	30616953	0	0	0	72869446
3810	12290692	0	0	0	26115224	9603297	0	0	0	67430340
3811	72209873	0	0	0	122791375	114787856	0	0	0	260298678
3812	33148019	0	0	0	101356625	29802198	0	0	0	75308554
3813	3489677	0	0	0	7681544	21923515	0	0	0	27478277
3814	10499748	0	0	0	22772748	28198383	0	0	0	47385663
3815	18638759	0	0	0	160905550	22403016	0	0	0	338166123
3816	103812133	0	0	0	35798000	91488771	0	0	0	124001054
3817	73143395	0	0	0	78146799	6445110	0	0	0	6776778
3818	554638	0	0	0	81312233	487533	0	0	0	238456166
3819	5912809	0	0	0	14791622	18737739	0	0	0	41799388
3820	12531902	0	0	0	20555913	29144022	0	0	0	36234963
3821	2354133	0	0	0	44901838	3707401	0	0	0	106497747
3822	16990741	0	0	0	839650437	11756854	0	0	0	1483060853
3823	209701964	0	0	0	181767691	72747600	0	0	0	79249062
3824	584153885	0	0	0	1117939870	688164300	0	0	0	1122106643
3825	1288620	0	0	0	1992530	4220141	0	0	0	2150878
3901	1484213973	0	0	0	1494332430	35835787	0	0	0	91088481
3902	646575905	0	0	0	707525149	255110038	0	0	0	328194060
3903	237532888	0	0	0	366444027	256421384	0	0	0	373022748
3904	449380007	0	0	0	554037341	188230157	0	0	0	278575856
3905	45535366	0	0	0	101348711	47966563	0	0	0	83032546
3906	204642190	0	0	0	368513511	247699117	0	0	0	545345454
3907	531612853	0	0	0	1052508748	257319243	0	0	0	539640479
3908	84740389	0	0	0	259544476	12548002	0	0	0	35459961
3909	89490643	0	0	0	184703444	100640310	0	0	0	230898539
3910	28637123	0	0	0	154999432	137083822	0	0	0	434159945
3911	53858284	0	0	0	149356121	24199168	0	0	0	225628282
3912	34032260	0	0	0	133060495	8757444	0	0	0	90409073
3913	2747279	0	0	0	32194455	3884026	0	0	0	40930785
3914	6518040	0	0	0	24062677	0	0	0	0	0
3915	31931188	0	0	0	13930015	344342681	0	0	0	113955176
3916	52418825	0	0	0	160472720	28706954	0	0	0	98147870
3917	86756460	0	0	0	371675341	93225712	0	0	0	652982695
3918	79845641	0	0	0	188331789	72896494	0	0	0	228146819
3919	96050805	0	0	0	479658386	44866718	0	0	0	391587688
3920	594783074	0	0	0	1710868292	302586695	0	0	0	1189669896
3921	184333042	0	0	0	746404114	76858324	0	0	0	434087081
3922	34020912	0	0	0	169284803	17413412	0	0	0	108369006
3923	704904600	0	0	0	1861260342	233606740	0	0	0	980480560
3924	127713676	0	0	0	430483789	21945771	0	0	0	155447250
3925	57266050	0	0	0	244856991	47543652	0	0	0	273106743
3926	399917998	0	0	0	1854415215	207347064	0	0	0	1122280676
4001	112922027	0	0	0	148869309	2927321	0	0	0	7122918
4002	171185122	0	0	0	308903656	138944820	0	0	0	228273753
4003	1467475	0	0	0	1147612	1478517	0	0	0	742280
4004	3643573	0	0	0	1723048	11575365	0	0	0	11619705
4005	64739604	0	0	0	129887352	155941967	0	0	0	320660267
4006	5455948	0	0	0	21098718	5678473	0	0	0	24179183
4007	1493670	0	0	0	4253339	1012302	0	0	0	3477653
4008	30692484	0	0	0	137304103	43432752	0	0	0	160937413
4009	32221082	0	0	0	318360410	16963404	0	0	0	207120106
4010	49598002	0	0	0	145515718	9894518	0	0	0	181611339
4011	529707959	0	51654798	0	2079484073	227361041	0	22508248	0	935742310
4012	27234297	0	0	0	48497495	33487044	0	0	0	46201990
4013	3995478	0	9903598	0	12588097	541305	0	359631	0	1992523
4014	3899477	0	0	0	68032518	1886015	0	0	0	41764904
4015	46002573	0	0	0	190477849	7977424	0	0	0	50750238
4016	81820428	0	0	0	533347511	43762715	0	0	0	493662833
4017	1761354	0	0	0	7981710	2608160	0	0	0	5859245
4101	44495401	0	0	0	70397592	48652047	0	0	0	98551556
4102	5528669	0	0	0	23052401	65422369	0	0	0	144141715
4103	867648	0	0	0	1532446	6929805	0	0	0	13194597
4104	2565855	0	0	0	28370351	29234906	0	0	0	142216624
4105	55994	0	0	0	1871108	315278	0	0	0	2596170
4106	100738	0	0	0	812780	1616175	0	0	0	5944080
4107	8631252	0	0	0	186378216	4203829	0	0	0	137392402
4112	139873	0	0	0	7223789	423299	0	0	0	41257892
4113	192219	0	0	0	5965513	75257	0	0	0	2545773
4114	349058	0	0	0	8116884	318440	0	0	0	10134959
4115	664154	0	0	0	3643455	4775280	0	0	0	7353263
4201	5239647	0	0	0	54929343	1152610	0	0	0	44733451
4202	161853251	0	0	0	1517091013	15675579	0	0	0	342701167
4203	17411601	0	0	0	367388923	1628684	0	0	0	97799895
4204	344431	0	0	0	2020196	270532	0	0	0	3827092
4205	9076251	0	0	0	99447707	678408	0	0	0	15330391
4206	5672666	0	0	0	414100	10408	0	0	0	183052
4301	33649	0	0	0	8591210	88605	0	0	0	6382969
4302	765084	0	0	0	49215760	610235	0	0	0	41874021
4303	301951	0	0	0	19375958	68318	0	0	0	9176751
4304	439927	0	0	0	5489785	37876	0	0	0	726217
4401	180177395	0	0	0	20637447	241306310	0	0	0	20423102
4402	57059649	0	0	0	28460425	8325176	0	0	0	6063864
4403	473628285	0	0	0	134014487	236744197	0	0	0	38697783
4404	28161043	0	0	0	15236017	25218065	0	0	0	9007800
4405	1537330	0	0	0	1452920	382117	0	0	0	1292532
4406	48356788	0	0	0	11065379	6470	0	0	0	76116
4407	4753229567	0	0	0	2186116323	209855020	0	0	0	93045952
4408	22203065	0	0	0	66605409	3466358	0	0	0	14874719
4409	172570850	0	0	0	265773761	57015181	0	0	0	58991152
4410	821845300	0	0	0	324298518	155686342	0	0	0	68072368
4411	708372060	0	0	0	565553455	102057785	0	0	0	42287382
4412	825549051	0	0	0	651833685	60525275	0	0	0	48845113
4413	23958003	0	0	0	16274737	937220	0	0	0	3400445
4414	17330167	0	0	0	47583431	3544912	0	0	0	12028417
4415	397826922	0	17404349	0	192054517	267738413	0	10825716	0	116467011
4416	14108520	0	0	0	18567710	545199	0	0	0	1020063
4417	6169352	0	0	0	12306881	320546	0	0	0	4657211
4418	304888441	0	0	0	700567842	38799325	0	0	0	140123952
4419	21721349	0	0	0	65503712	2957481	0	0	0	18375589
4420	21124362	0	0	0	76394808	2271706	0	0	0	15525775
4421	143489797	0	0	0	279503808	7301005	0	0	0	36189419
4501	520971	0	0	0	1646891	50146	0	0	0	446979
4502	174080	0	0	0	945363	39161	0	0	0	291024
4503	793647	0	0	0	11555768	38062	0	0	0	434103
4504	3199176	0	0	0	10338660	456060	0	0	0	5339381
4601	7442172	0	0	0	14978826	549573	0	0	0	2614572
4602	27920749	0	0	0	85086710	565458	0	0	0	4115692
4701	92915622	0	0	0	52834127	2550515	0	0	0	756594
4702	7753275	0	0	0	4335383	613122	0	0	0	1650339
4703	1637441743	0	0	0	826451839	981500	0	0	0	477466
4704	123589574	0	0	0	76087076	145831	0	0	0	252271
4705	13017234	0	0	0	6934621	50625	0	0	0	555167
4706	71994741	0	0	0	62890340	25879024	0	0	0	9785129
4707	87217844	0	0	0	12395860	3168790802	0	0	0	445067825
4801	1648243096	0	0	0	974927831	183865287	0	0	0	110355755
4802	1810160992	0	0	0	1629910043	263691675	0	0	0	463073035
4803	161662279	0	0	0	192688820	29515491	0	0	0	50070206
4804	765811386	0	0	0	483735755	54941174	0	0	0	62935829
4805	476973555	0	0	0	287196368	527779261	0	0	0	303280698
4806	79871618	0	0	0	124800076	11366019	0	0	0	27747148
4807	87482984	0	0	0	56809142	5681036	0	0	0	13817471
4808	16108302	0	0	0	25874850	35053588	0	0	0	65902096
4809	42773717	0	0	0	73676103	62295370	0	0	0	69459935
4810	2768923616	0	0	0	2543461927	301266876	0	0	0	372898562
4811	249197411	0	0	0	669001216	189176506	0	0	0	573188643
4812	420848	0	0	0	2115199	1828912	0	0	0	9563469
4813	10447785	0	0	0	72021723	9836236	0	0	0	56788695
4814	18215776	0	0	0	80890807	15616980	0	0	0	103672271
4815	86517	0	0	0	241412	55783	0	0	0	293206
4816	21214924	0	0	0	37510699	18236506	0	0	0	31502777
4817	77041126	0	0	0	186575903	7918545	0	0	0	39315730
4818	317577611	0	0	0	789592874	171408429	0	0	0	506671221
4819	371758511	0	0	0	614704632	174580701	0	0	0	405299870
4820	102232909	0	0	0	278191520	17868115	0	0	0	104045053
4821	143155607	0	0	0	186261911	14960564	0	0	0	196547471
4822	2760439	0	0	0	7264096	3661887	0	0	0	6398753
4823	195985333	0	0	0	381802582	58620477	0	0	0	304730135
4901	762393673	0	0	0	1461799456	230484918	0	0	0	2435003207
4902	164553148	0	0	0	488530533	82228293	0	0	0	1132964650
4903	11330609	0	0	0	35583094	3663177	0	0	0	25758939
4904	533962	0	0	0	11278784	965306	0	0	0	24802178
4905	2918188	0	0	0	17597080	785968	0	0	0	51894051
4906	2584045	0	0	0	18176060	64118	0	0	0	12624192
4907	3837811	0	0	0	124298464	862579	0	0	0	52989126
4908	3536961	0	0	0	36066717	2539800	0	0	0	43586060
4909	26861805	0	0	0	137709915	42016737	0	0	0	113098995
4910	5273856	0	0	0	25734327	926379	0	0	0	12144874
4911	193366157	0	0	0	586987936	50083533	0	0	0	321958167
5001	25138	0	0	0	93572	1758	0	0	0	8403
5002	27206	0	0	0	582141	171	0	0	0	8506
5003	305439	0	0	0	1570758	161177	0	0	0	1190101
5004	178537	0	0	0	6548537	30001	0	0	0	643499
5005	73396	0	0	0	1631860	43420	0	0	0	805963
5006	33118	0	0	0	431809	58514	0	0	0	2682477
5007	964658	0	0	0	64168387	614260	0	0	0	55909727
5101	55878712	0	0	0	132311576	42214387	0	0	0	109021832
5102	3578186	0	0	0	93538992	995591	0	0	0	22861785
5103	5537275	0	0	0	8242404	7016615	0	0	0	14827091
5104	38227	0	0	0	139307	106149	0	0	0	331566
5105	7701249	0	0	0	52815562	7262888	0	0	0	47873550
5106	9929504	0	0	0	63717270	6806324	0	0	0	55705130
5107	7107722	0	0	0	76920099	1860239	0	0	0	25078923
5108	421439	0	0	0	12427238	1064499	0	0	0	85755163
5109	227344	0	0	0	4329713	533659	0	0	0	8180078
5110	7335	0	0	0	162632	18119	0	0	0	101815
5111	2393410	0	0	0	41850017	3348651	0	0	0	90635315
5112	1757308	0	0	0	46467256	3375818	0	0	0	152718387
5113	36973	0	0	0	392490	13059	0	0	0	620602
5201	18824682	0	0	0	32199287	159535	0	0	0	2895829
5202	12641072	0	0	0	10440349	516819	0	0	0	1020464
5203	13930713	0	0	0	25162261	30182	0	0	0	207364
5204	464484	0	0	0	3631996	432790	0	0	0	5852055
5205	19748069	0	0	0	77822250	6109408	0	0	0	30655545
5206	5439584	0	0	0	16796005	118084	0	0	0	1569901
5207	4956165	0	0	0	11657340	226126	0	0	0	9132256
5208	29181163	0	0	0	181305707	9810560	0	0	0	178411711
5209	21025189	0	0	0	131024023	4511106	0	0	0	81231151
5210	8932702	0	0	0	48221321	918948	0	0	0	15921960
5211	9944318	0	0	0	91752778	1917985	0	0	0	34361507
5212	1134188	0	0	0	17440829	590789	0	0	0	11770229
5301	616458	0	0	0	1617992	189086	0	0	0	250587
5302	1144267	0	0	0	668620	3413905	0	0	0	1860129
5303	314213	0	0	0	513032	9352	0	0	0	204320
5304	41527	0	0	0	65838	5566	0	0	0	99057
5305	21411442	0	0	0	19755744	49022	0	0	0	799383
5306	3584626	0	0	0	31182389	1379951	0	0	0	17839546
5307	3573881	0	0	0	3608774	379448	0	0	0	646446
5308	369115	0	0	0	964520	197121	0	0	0	1220332
5309	3200628	0	0	0	63144347	3757685	0	0	0	101174343
5310	11780677	0	0	0	13234691	2570188	0	0	0	3987537
5311	127001	0	0	0	1745266	660665	0	0	0	5189402
5401	1804596	0	0	0	19049974	1829843	0	0	0	33945109
5402	154601358	0	0	0	505443825	27901439	0	0	0	135820564
5403	4496210	0	0	0	23424620	487618	0	0	0	2430206
5404	8284619	0	0	0	50431748	9882307	0	0	0	51009921
5405	16406	0	0	0	81142	3026	0	0	0	39432
5406	423376	0	0	0	3050812	108274	0	0	0	913867
5407	105169172	0	0	0	515024849	43492244	0	0	0	374219391
5408	11492473	0	0	0	80372981	1637285	0	0	0	25477517
5501	3623961	0	0	0	9686414	1304924	0	0	0	5024230
5502	4094113	0	0	0	16535709	22754743	0	0	0	81825219
5503	189611397	0	0	0	252854712	44974639	0	0	0	75276653
5504	10121674	0	0	0	20060840	996429	0	0	0	3464217
5505	20184687	0	0	0	16028721	27524301	0	0	0	37950417
5506	3138640	0	0	0	9228871	7928374	0	0	0	22904772
5507	15313	0	0	0	87539	3554	0	0	0	34987
5508	1142630	0	0	0	9036717	218946	0	0	0	3103593
5509	27255840	0	0	0	145050578	1512211	0	0	0	11217246
5510	9715904	0	0	0	31526141	355751	0	0	0	748883
5511	1097444	0	0	0	6218747	616166	0	0	0	7798992
5512	4431789	0	0	0	51670339	1883609	0	0	0	31447938
5513	21941985	0	0	0	88080781	3948460	0	0	0	24282550
5514	14861297	0	0	0	59707681	7117420	0	0	0	70090877
5515	7382763	0	0	0	91980582	19222884	0	0	0	200067787
5516	19281136	0	0	0	142845055	3832256	0	0	0	71418432
5601	69774919	0	0	0	105975462	13505055	0	0	0	119884455
5602	13756261	0	0	0	52425457	15282140	0	0	0	75633462
5603	513731726	0	0	0	409216449	30954659	0	0	0	163745007
5604	1596050	0	0	0	11532335	928847	0	0	0	8861208
5605	421364	0	0	0	6284998	168377	0	0	0	5446683
5606	848880	0	0	0	10893965	18460	0	0	0	282329
5607	18019882	0	0	0	42736367	4917603	0	0	0	34090355
5608	5261465	0	0	0	25344484	1179287	0	0	0	14681870
5609	778689	0	0	0	4634225	547368	0	0	0	6496256
5701	6117172	3074998	0	0	67386992	1171211	722101	0	0	28956553
5702	58116245	109870586	0	0	263217124	8425960	4548015	0	0	126107509
5703	304302634	161705629	0	0	1115206423	29330119	11982131	0	0	163202379
5704	23475133	18824589	0	0	50764828	5142265	1778616	0	0	14346041
5705	9098983	8302162	0	0	38001381	9328014	3015254	0	0	48759537
5801	14564530	0	0	0	180583767	3059668	0	0	0	69258885
5802	568904	0	0	0	4803273	65094	0	0	0	808803
5803	145262	0	0	0	1615119	48634	0	0	0	2230815
5804	784645	0	0	0	12513282	346254	0	0	0	19037424
5805	52612	0	0	0	1248891	58261	0	0	0	3202126
5806	7867194	0	0	0	55952003	7128384	0	0	0	89317521
5807	1536748	0	0	0	19844485	2747009	0	0	0	58264955
5808	1635265	0	0	0	30816038	964887	0	0	0	21147078
5809	33115	0	0	0	416727	16309	0	0	0	433112
5810	3104068	0	0	0	67275320	522609	0	0	0	21401920
5811	1878445	0	0	0	12815073	162097	0	0	0	3892196
5901	2418228	0	0	0	13084725	1168534	0	0	0	12355822
5902	9011647	0	0	0	47740724	1081797	0	0	0	7240040
5903	12449755	0	0	0	115998771	23565991	0	0	0	336885911
5904	3286650	1159421	0	0	7664721	9239178	3350130	0	0	24315758
5905	127953	0	0	0	3909113	99765	0	0	0	1237585
5906	11380494	0	0	0	37721044	5321452	0	0	0	49965314
5907	3078625	0	0	0	24930023	2271397	0	0	0	19413883
5908	94255	0	0	0	583264	50593	0	0	0	1375347
5909	522196	0	0	0	6262645	1228876	0	0	0	21574061
5910	675452	0	0	0	8446898	3948763	0	0	0	27314842
5911	3237584	0	0	0	85431539	6283331	0	0	0	176953257
6001	8733105	0	0	0	44709258	19416718	0	0	0	69611905
6002	3149098	0	0	0	38608904	2654166	0	0	0	38487746
6003	1105415	0	0	0	6529199	377585	0	0	0	12214611
6004	3464650	0	0	0	44631155	2818036	0	0	0	45183549
6005	4470062	0	0	0	35494520	8544574	0	0	0	63985475
6006	4603557	0	0	0	39261474	2714280	0	0	0	37592765
6101	4950085	0	9034783	0	99261534	532057	0	800916	0	21842750
6102	22472886	0	24840766	0	232904857	1556040	0	2730610	0	44749489
6103	16286947	0	55239699	0	274599568	1341076	0	3689502	0	40248076
6104	36565416	0	108356101	0	692422745	3357436	0	12246395	0	139780985
6105	26144182	0	90542518	0	409761256	2775363	0	10988188	0	104637086
6106	14260863	0	64933174	0	320005865	5669221	0	14188650	0	130598330
6107	19843716	0	178641138	0	302550022	1198896	0	9258695	0	34418178
6108	51360165	0	481802150	0	802482886	1909237	0	21215365	0	87615480
6109	168734564	0	692506635	0	2844738609	21909977	0	74343443	0	521776940
6110	155565015	0	349706104	0	2602225832	18560566	0	751785897	0	675072052
6111	24797965	0	0	0	468449726	3012446	0	0	0	89380125
6112	9574616	0	47189311	0	240032370	1059265	0	4103741	0	80520313
6113	1095491	0	0	0	21909213	152084	0	0	0	7303208
6114	6187985	0	0	0	140414815	810944	0	0	0	24111839
6115	41777284	0	0	0	649165213	3420682	0	0	0	104948709
6116	11353799	0	0	0	113968125	930714	0	0	0	15473436
6117	6026851	0	0	0	94134053	3808574	0	0	0	50448068
6201	24682218	0	31610719	0	463393577	66491434	0	3477310	0	129333208
6202	40214214	0	54546745	0	710089186	3284530	0	4328555	0	141130457
6203	107226651	0	214611982	0	2337996956	9538910	0	16099849	0	419998174
6204	204352233	0	505688077	0	4079258570	17721927	0	228626218	0	669887607
6205	44313706	0	150150308	0	940527554	3928362	0	11786894	0	185989470
6206	46092446	0	156947383	0	972342766	5120158	0	32886373	0	216733903
6207	6691211	0	0	0	104782593	542318	0	0	0	24123837
6208	15217193	0	0	0	244591455	1283922	0	0	0	28060299
6209	10220753	0	0	0	224923810	869480	0	0	0	25130240
6210	14638066	0	0	0	319547565	4400638	0	0	0	158264667
6211	20769279	0	0	0	431780383	2845093	0	0	0	100706002
6212	18291491	0	0	0	694888672	1297682	0	0	0	114263684
6213	585949	0	0	0	6738454	30654	0	0	0	2236926
6214	7161440	0	33751343	0	126088240	1064242	0	6409082	0	108056700
6215	1565916	0	0	0	69226328	400169	0	0	0	38741239
6216	2187836	0	0	0	25789953	218319	0	0	0	6299758
6217	4320926	0	0	0	64872377	11892355	0	0	0	247195437
6301	9995349	0	0	0	66708459	1988869	0	0	0	27895704
6302	131361231	0	0	0	1016180549	10740010	0	0	0	125424131
6303	42578250	0	0	0	320770053	2203634	0	0	0	44182588
6304	23424292	0	0	0	169130129	1041023	0	0	0	23312366
6305	31083254	0	0	0	73456163	2609430	0	0	0	10172837
6306	39977319	0	0	0	164131135	1853931	0	0	0	20797928
6307	43337214	0	0	0	233920717	7819010	0	0	0	182966618
6308	205502	0	0	0	4110570	112714	0	0	0	3837004
6309	13913236	0	0	0	8868269	196837506	0	0	0	195446338
6310	24983984	0	0	0	11167964	12128883	0	0	0	10372545
6401	7156525	0	0	0	35504151	940806	0	0	0	12282742
6402	58953798	0	0	0	635904307	3175143	0	0	0	69309374
6403	162977164	0	0	0	3332772144	12710463	0	0	0	573110158
6404	45825723	0	0	0	613975257	2940404	0	0	0	92369267
6405	20076313	0	0	0	196057165	1331367	0	0	0	28290029
6406	4614335	0	0	0	83923890	1641182	0	0	0	29737353
6501	19452	0	0	0	452828	7560	0	0	0	509200
6502	9568	0	0	0	229156	1735	0	0	0	47682
6503	661909	0	716451	0	4521249	12816	0	335603	0	823502
6504	581849	0	0	0	10636436	127730	0	0	0	7376710
6505	10302319	0	0	0	187145792	2001410	0	0	0	81949114
6506	5732113	0	0	0	96026471	3189033	0	0	0	58585121
6507	445696	0	0	0	7041954	67165	0	0	0	4189333
6601	17745856	0	23132210	0	74340493	1054283	0	1442655	0	14438846
6602	386121	0	5687272	0	4441117	73476	0	1243370	0	1975502
6603	1701226	0	0	0	2136794	7305745	0	0	0	19114935
6701	152845	0	0	0	2673906	22656	0	0	0	384214
6702	9612317	0	0	0	71521432	1739545	0	0	0	10168221
6703	257064	0	0	0	12361269	14944	0	0	0	973270
6704	1411732	0	0	0	28405876	204680	0	0	0	9317404
6801	184332724	0	0	0	39478660	4997556	0	0	0	2075642
6802	212124844	0	0	0	208380966	7085922	0	0	0	15245121
6803	220802685	0	0	0	112399339	19833803	0	0	0	22844920
6804	25636115	0	0	0	98946689	4546879	0	0	0	43266843
6805	13172617	0	0	0	110518308	22355510	0	0	0	170164717
6806	198642244	0	0	0	129203104	87408735	0	0	0	188455830
6807	56914461	0	0	0	46750551	31381589	0	0	0	33271417
6808	21298653	0	0	0	12966268	20059123	0	0	0	21131641
6809	423855827	0	0	0	85849904	147465758	0	0	0	40424295
6810	112787047	0	0	0	102751775	1290510489	0	0	0	210812473
6811	64515745	0	0	0	35373593	16430201	0	0	0	12050781
6812	359581	0	0	0	1801163	898574	0	0	0	6680125
6813	7914562	0	0	0	59527777	3703029	0	0	0	44646454
6814	568998	0	0	0	5861211	377166	0	0	0	6428003
6815	49735465	0	0	0	171286796	53866918	0	0	0	213631763
6901	83449957	0	0	0	32492500	10039894	0	0	0	3193226
6902	108153341	0	0	0	79554945	47800615	0	0	0	55856333
6903	9944295	0	0	0	37773908	40470333	0	0	0	179889288
6904	323910948	0	0	0	50117689	94356683	0	0	0	19837353
6905	48989885	0	0	0	21174018	13452319	0	0	0	9254884
6906	290149	0	0	0	1426151	36275427	0	0	0	16795036
6907	67994147	4354931	0	0	63987117	3384648	292548	0	0	3347294
6908	782110859	66262141	0	0	546268179	30581974	2770719	0	0	29400494
6909	10031025	0	0	0	48500740	2047309	0	0	0	43940030
6910	131920976	0	0	0	290713866	24593511	0	0	0	81116065
6911	41508317	0	0	0	134513378	8697966	0	0	0	160347950
6912	74225513	0	0	0	173435669	29995975	0	0	0	188790006
6913	69999227	0	0	0	123819205	4070433	0	0	0	45515443
6914	74407697	0	0	0	73734646	2483824	0	0	0	21096861
7001	52438784	0	0	0	17598522	149179962	0	0	0	46447155
7002	31783094	0	0	0	33082114	1226098	0	0	0	7451506
7003	6865895	0	0	0	8795550	5373589	0	0	0	5934038
7004	18717041	7779510	0	0	8212913	3958636	4267120	0	0	7423669
7005	180289938	21151364	0	0	121326328	184660486	23958949	0	0	80483270
7006	12359418	0	0	0	21318465	894437	0	0	0	17831746
7007	162810005	0	0	0	534503879	36104933	0	0	0	209067637
7008	8810426	0	0	0	24970552	2042436	0	0	0	10340490
7009	234266015	0	0	0	221741759	30644612	0	0	0	143336408
7010	280761340	0	0	0	271999711	340628777	0	0	0	140107059
7011	42113647	0	0	0	109638455	88811814	0	0	0	127687691
7012	103413	0	0	0	420567	87781	0	0	0	104030
7013	139715580	0	0	0	376078314	17089139	0	0	0	87141966
7014	1909147	0	0	0	8609848	240892	0	0	0	4904609
7015	71476	0	0	0	1780442	10222	0	0	0	789666
7016	14229429	0	0	0	36381132	1352766	0	0	0	7606342
7017	2638366	0	0	0	37166452	7603178	0	0	0	55860607
7018	9167440	0	0	0	31370346	13550044	0	0	0	12112518
7019	581259682	0	0	0	272776551	118248807	0	0	0	392051457
7020	11392856	0	0	0	51750917	11687378	0	0	0	76416244
7101	22964	0	0	0	58397294	3201	0	0	0	32347128
7102	54614	0	0	0	8211293429	45243	0	0	0	8592489002
7103	534596	0	0	0	108857995	246030	0	0	0	80503243
7104	92365	0	0	0	10732976	9363	0	0	0	6792278
7105	26815	0	0	0	20960299	35310	0	0	0	20704315
7106	2492063	0	0	0	553267516	2076478	0	0	0	387848474
7107	560718	0	0	0	4052680	120932	0	0	0	2460143
7108	719684	0	0	0	3964570600	356772	0	0	0	1461393750
7109	4506	0	0	0	548167	66992	0	0	0	2244180
7110	89424	0	0	0	961445718	130813	0	0	0	1929687995
7111	803	0	0	0	1860457	680	0	0	0	1411648
7112	3549642	0	0	0	933957060	6089207	0	0	0	152453369
7113	661733	0	0	0	3024902330	90135	0	0	0	1770624157
7114	153085	0	0	0	25726030	127578	0	0	0	52519303
7115	49002	0	0	0	24633016	33997	0	0	0	141101225
7116	44113	0	0	0	15678090	15436	0	0	0	7705603
7117	8747631	0	0	0	300613923	2110888	0	0	0	141827574
7118	470372	0	0	0	3544063	5255663	0	0	0	48363838
7201	104758074	0	0	0	34638782	1225973	0	0	0	970177
7202	424676246	0	0	0	432815297	55350584	0	0	0	425440425
7203	461491	0	0	0	1464256	935635	0	0	0	1626851
7204	226447250	0	0	0	129814894	6852713753	0	0	0	1870203421
7205	45673379	0	0	0	48520521	53132988	0	0	0	57225647
7206	835381	0	0	0	1926073	11107719	0	0	0	8975479
7207	786893039	0	0	0	353090472	1302383189	0	0	0	525147144
7208	1102513280	0	0	0	617743759	976307288	0	0	0	544160463
7209	491004058	0	0	0	288549421	368864048	0	0	0	220404133
7210	1792590611	0	0	0	1267236327	759798357	0	0	0	652818456
7211	129898170	0	0	0	106758791	106264263	0	0	0	97843047
7212	78235553	0	0	0	80529823	87500357	0	0	0	122592542
7213	333650882	0	0	0	178441179	764256225	0	0	0	441079951
7214	509841352	0	0	0	270737923	448577995	0	0	0	270078297
7215	117436938	0	0	0	85559728	155259404	0	0	0	134888534
7216	858202642	0	0	0	526266766	707608691	0	0	0	445312197
7217	101614832	0	0	0	111312955	151342202	0	0	0	145449621
7218	32649460	0	0	0	71665411	394074021	0	0	0	854717766
7219	451712992	0	0	0	990227446	160559105	0	0	0	441674008
7220	56021941	0	0	0	108204985	43634530	0	0	0	138226307
7221	3222736	0	0	0	9023087	35105828	0	0	0	93278049
7222	53825818	0	0	0	177324874	28777015	0	0	0	100293957
7223	16248002	0	0	0	57129214	4728592	0	0	0	20282040
7224	21804611	0	0	0	22149847	47849991	0	0	0	43626108
7225	511495458	0	0	0	344712983	99232423	0	0	0	97608768
7226	59893001	0	0	0	49908336	66784875	0	0	0	81646079
7227	46125076	0	0	0	39076448	20842902	0	0	0	14222277
7228	164257819	0	0	0	198430306	256124809	0	0	0	276461933
7229	10432103	0	0	0	25657142	17757361	0	0	0	34339033
7301	51566488	0	0	0	63979254	70000353	0	0	0	57202659
7302	75784038	0	0	0	88762573	42341172	0	0	0	64394273
7303	16094573	0	0	0	19220564	30175203	0	0	0	27945557
7304	306449112	0	0	0	469640631	132385203	0	0	0	406053888
7305	149114939	0	0	0	119700854	161203529	0	0	0	185107077
7306	518326980	0	0	0	521130493	328559488	0	0	0	340810095
7307	67419702	0	0	0	341204253	47848844	0	0	0	439428349
7308	535059647	0	0	0	621194171	269016149	0	0	0	702563083
7309	13944604	0	0	0	44332188	30313933	0	0	0	109386870
7310	50608721	0	0	0	184485961	36956638	0	0	0	143704395
7311	21068482	0	0	0	76101787	13531971	0	0	0	74606015
7312	65507252	0	0	0	126688602	42929502	0	0	0	123260373
7313	3704562	0	0	0	5314383	6196427	0	0	0	10398259
7314	131731349	0	0	0	144446720	69783427	0	0	0	97586670
7315	19952291	0	0	0	100509404	19115595	0	0	0	108808607
7316	1537041	0	0	0	4770083	2449871	0	0	0	18737043
7317	61697086	0	0	0	95449400	12935405	0	0	0	38431873
7318	864143514	0	0	0	862433873	46559028	0	0	0	492644266
7319	648130	0	0	0	8637579	293853	0	0	0	7663453
7320	46455787	0	0	0	134774749	28356210	0	0	0	125788777
7321	91995201	0	0	0	347472396	11088486	0	0	0	78104931
7322	153114004	0	0	0	429638629	17577542	0	0	0	65445125
7323	90752230	0	0	0	407499789	9025078	0	0	0	46905473
7324	28682542	0	0	0	150585447	3866422	0	0	0	49377598
7325	114952528	0	0	0	165734867	109130514	0	0	0	240879111
7326	268730332	0	0	0	793707768	153445393	0	0	0	597985883
7401	9797	0	0	0	124239	79147	0	0	0	815314
7402	136282	0	0	0	172768	803532	0	0	0	7329823
7403	242059190	0	0	0	704998987	25168562	0	0	0	63729392
7404	16148146	0	0	0	29593267	247778844	0	0	0	377389441
7405	1608216	0	0	0	4895905	3571846	0	0	0	12305055
7406	3729635	0	0	0	13621228	6824568	0	0	0	36839964
7407	35056519	0	0	0	99597634	16684032	0	0	0	53347680
7408	62648734	0	0	0	198871493	67504689	0	0	0	209637794
7409	51797501	0	0	0	203107709	16591811	0	0	0	83786855
7410	11028238	0	0	0	56819844	2734914	0	0	0	19609099
7411	59298717	0	0	0	246248891	19010737	0	0	0	77805661
7412	16699050	0	0	0	129964271	11127208	0	0	0	127255107
7413	5424530	0	0	0	26983956	11510152	0	0	0	52785218
7414	1927407	0	0	0	6199005	342317	0	0	0	7023928
7415	4180831	0	0	0	20438360	1182873	0	0	0	17482717
7416	66910	0	0	0	2298688	28853	0	0	0	1099354
7417	131024	0	0	0	1153756	730679	0	0	0	7593314
7418	5117635	0	0	0	55993735	657770	0	0	0	19661233
7419	7808865	0	0	0	57328577	4371676	0	0	0	66084155
7501	64239524	0	0	0	435650315	947626	0	0	0	4613334
7502	49656387	0	0	0	501097456	43196036	0	0	0	507755201
7503	9448658	0	0	0	43822230	11538814	0	0	0	57193270
7504	1044435	0	0	0	18408211	8972366	0	0	0	120154213
7505	6210637	0	0	0	113489329	4572941	0	0	0	108816695
7506	4397614	0	0	0	70255605	1724239	0	0	0	46807960
7507	1289609	0	0	0	17935274	1290818	0	0	0	47599508
7508	507431	0	0	0	16236168	1150174	0	0	0	14899738
7601	316666155	0	0	0	591576117	336256622	0	0	0	598876952
7602	77977236	0	0	0	97386947	319712828	0	0	0	414163184
7603	5264860	0	0	0	18550521	10228176	0	0	0	29975146
7604	101898340	0	0	0	370389344	33711526	0	0	0	146811485
7605	14197707	0	0	0	33306744	11472847	0	0	0	40238663
7606	346193353	0	0	0	920809145	192404552	0	0	0	610562762
7607	83716274	0	0	0	348044368	38903141	0	0	0	180981788
7608	15272244	0	0	0	79701331	7242249	0	0	0	53742017
7609	1855004	0	0	0	20669316	864465	0	0	0	17180619
7610	38497320	0	0	0	353447043	18993527	0	0	0	173694172
7611	2129833	0	0	0	18737811	1098301	0	0	0	10729343
7612	23935342	0	0	0	153971208	30106265	0	0	0	112965345
7613	673458	0	0	0	12742897	7577987	0	0	0	65696782
7614	3097991	0	0	0	10939876	665592	0	0	0	3193706
7615	18484660	0	0	0	136951623	1962340	0	0	0	19818372
7616	38686601	0	0	0	271042324	22353988	0	0	0	321309748
7801	188178682	0	0	0	219086252	67045259	0	0	0	70547707
7802	7810640	0	0	0	5859343	24882197	0	0	0	12742014
7803	307063	0	0	0	1305112	1245870	0	0	0	2725857
7804	22750961	0	0	0	28191453	19354493	0	0	0	22430064
7805	4051	0	0	0	206887	65535	0	0	0	598634
7806	878934	0	0	0	3235853	2777521	0	0	0	7445907
7901	171329618	0	0	0	191415165	28006787	0	0	0	34430658
7902	189677	0	0	0	107938	7124158	0	0	0	6942610
7903	584961	0	0	0	889809	2151572	0	0	0	2994667
7904	2817252	0	0	0	3685704	3052568	0	0	0	4824439
7905	3024880	0	0	0	13548757	119820	0	0	0	544250
7906	85331	0	0	0	377526	157546	0	0	0	7751934
7907	3435810	0	0	0	20364405	2956159	0	0	0	28897092
8001	7132054	0	0	0	59697156	1493673	0	0	0	12229045
8002	234456	0	0	0	434024	7861837	0	0	0	7918522
8003	718687	0	0	0	5764789	363484	0	0	0	3001010
8004	59334	0	0	0	668448	123944	0	0	0	2312063
8005	554262	0	0	0	7596643	594320	0	0	0	8300500
8006	1601	0	0	0	34307	12530	0	0	0	191215
8007	1408467	0	0	0	9468276	392422	0	0	0	7252703
8101	2033552	0	0	0	27945865	1303504	0	0	0	13347417
8102	1890175	0	0	0	33154575	332390	0	0	0	8488925
8103	267900	0	0	0	111049493	78813	0	0	0	36502765
8104	16380657	0	0	0	44151249	6852799	0	0	0	32267374
8105	4018314	0	0	0	125239325	1933079	0	0	0	65956341
8106	2193804	0	0	0	14941863	2798535	0	0	0	23082140
8107	449321	0	0	0	1133628	27597	0	0	0	269149
8108	34366938	0	0	0	318026023	12121465	0	0	0	194672282
8109	442754	0	0	0	9228351	185406	0	0	0	3053853
8110	433667	0	0	0	1523044	84728	0	0	0	445427
8111	10028902	0	0	0	17080381	61650	0	0	0	43262
8112	3547219	0	0	0	49800803	6084720	0	0	0	62782257
8113	187933	0	0	0	4294114	9874	0	0	0	410827
8201	17949541	0	0	0	64380956	2592947	0	0	0	22738813
8202	11505415	0	0	0	114574046	5415117	0	0	0	94867965
8203	212384826	0	0	0	68235273	1705266	0	0	0	35843148
8204	11251037	0	0	0	80524078	3804995	0	0	0	57565102
8205	293086799	0	0	0	315216531	16175260	0	0	0	196418421
8206	6730995	0	0	0	37147711	1135981	0	0	0	12551825
8207	22908072	0	0	0	464953090	23764934	0	0	0	643732302
8208	9170477	0	0	0	64578026	3084805	0	0	0	76217164
8209	1309970	0	0	0	136068468	1345914	0	0	0	79006469
8210	2770827	0	0	0	18148210	879092	0	0	0	9635953
8211	9576035	0	0	0	62669375	2118816	0	0	0	28427069
8212	43060780	0	0	0	501111573	29209166	0	0	0	841374334
8213	2641542	0	0	0	23766657	186034	0	0	0	4050002
8214	4406009	0	0	0	27790384	943405	0	0	0	10746831
8215	61884428	0	0	0	108458347	2021460	0	0	0	29053699
8301	30712270	0	0	0	408886704	9492555	0	0	0	128487639
8302	183840672	0	0	0	1026725419	1034729995	0	0	0	428855386
8303	19453295	0	0	0	54052021	2591146	0	0	0	14277069
8304	2717358	0	0	0	10589662	1250885	0	0	0	7171217
8305	11623685	0	0	0	32521413	2797287	0	0	0	11668346
8306	21270773	0	0	0	101133529	1309864	0	0	0	27043372
8307	4729387	0	0	0	40572336	3730448	0	0	0	42481590
8308	9634299	0	0	0	67193477	8988199	0	0	0	125013612
8309	63567175	0	0	0	228363507	28118543	0	0	0	183425956
8310	3460125	0	0	0	28769936	1230704	0	0	0	16667371
8311	19267948	0	0	0	60733514	14856880	0	0	0	60246814
8401	1327277	0	0	0	39414938	472691	0	0	0	20485048
8402	2640935	0	0	0	22283112	6280816	0	0	0	67649814
8403	54801035	0	0	0	683175739	7193046	0	0	0	86420291
8404	3776179	0	0	0	21431672	17107591	0	0	0	82029955
8405	5991220	0	0	0	42005295	1128490	0	0	0	52277927
8406	879932	0	0	0	60952508	3395927	0	0	0	147931908
8407	63891679	0	1097220	0	799278057	170122647	0	2436872	0	2497002859
8408	165828334	0	1416134	0	1779161091	96810317	0	2530432	0	1142789472
8409	345055124	0	0	0	2358238858	141119648	0	0	0	1748922112
8410	686341	0	0	0	18953389	802619	0	0	0	17090080
8411	19187997	0	0	0	7542122106	25174692	0	0	0	12575905732
8412	31035569	0	0	0	394689279	22385946	0	0	0	369094027
8413	75306050	0	0	0	1488108319	52214997	0	0	0	1389022426
8414	113418604	0	0	0	1521077278	66515116	0	0	0	1515452880
8415	105347024	0	0	0	909441565	44498774	0	0	0	615926500
8416	3386848	0	0	0	64119766	3978287	0	0	0	91566654
8417	3621575	0	0	0	54259556	8261916	0	0	0	79752450
8418	266354929	0	0	0	1630322484	44385651	0	0	0	375888473
8419	40387395	0	0	0	629755444	35504023	0	0	0	694772179
8420	3796589	0	0	0	13783310	4159610	0	0	0	23485296
8421	86133741	0	0	0	1171785559	81890728	0	0	0	1604003205
8422	66004534	0	0	0	946634977	16684152	0	0	0	348543278
8423	11374398	0	0	0	157695345	4279027	0	0	0	154688802
8424	47039669	0	0	0	440267274	21467608	0	0	0	386056799
8425	25385992	0	2558447	0	166090336	14079552	0	2389345	0	142784875
8426	30734801	0	0	0	265624572	21959155	0	0	0	104071922
8427	99963032	0	88699	0	670722967	1316683364	0	84623674	0	1260511476
8428	238203521	0	0	0	691327088	152312101	0	0	0	715116372
8429	207907670	0	100996	0	1218777516	655231743	0	161261	0	2085820115
8430	7798634	0	0	0	98911213	12088337	0	0	0	130380523
8431	550414849	0	0	0	1692309635	263241634	0	0	0	2041428217
8432	41234621	0	0	0	264798652	15415561	0	0	0	86578420
8433	65455004	0	0	0	556187267	28821552	0	0	0	233591228
8434	3673080	0	0	0	53416091	2689799	0	0	0	41637823
8435	173883	0	0	0	3774774	290664	0	0	0	3433193
8436	18992093	0	0	0	143858413	5603728	0	0	0	45039025
8437	984918	0	0	0	15245197	3252761	0	0	0	81009163
8438	12305970	0	0	0	359460029	11819629	0	0	0	243342644
8439	8069893	0	0	0	89295003	17699193	0	0	0	138313998
8440	11590232	0	0	0	97634315	3100739	0	0	0	53902735
8441	13174372	0	0	0	195932583	11090786	0	0	0	178797606
8442	8042343	0	0	0	90880880	14286550	0	0	0	223071295
8443	27485165	0	0	0	692139608	28005931	0	0	0	807398646
8444	250517	0	5176	0	6050060	1674755	0	23029	0	10853011
8445	447009	0	21662	0	7088215	5774215	0	129994	0	24812350
8446	675318	0	833077	0	12898259	3455093	0	4006	0	8672241
8447	1234148	0	25408	0	26705724	4552476	0	33310	0	40637323
8448	2328609	0	0	0	60954113	5071032	0	0	0	112800182
8449	100769	0	0	0	4515206	188723	0	0	0	5785687
8450	120061791	0	0	0	537932205	15740499	0	0	0	82078555
8451	17139205	0	0	0	139726570	27770694	0	0	0	161313671
8452	4222778	0	0	0	58067317	2603568	0	0	0	35556412
8453	528157	0	0	0	8720716	1087760	0	0	0	9994532
8454	16334801	0	0	0	44674485	5064855	0	0	0	50087514
8455	15814850	0	0	0	32813001	53604713	0	0	0	146824796
8456	2513266	0	4283	0	133760573	1278088	0	4742966	0	105736048
8457	10545185	0	3130	0	130820386	12415247	0	6500	0	192830764
8458	10412130	0	22632	0	173554351	11553594	0	5493	0	118243470
8459	6284523	0	166126	0	81254575	14133591	0	37196	0	69536921
8460	2855841	0	309760	0	69500249	6237624	0	38808	0	88409147
8461	3820964	0	306894	0	45018869	5531751	0	175155	0	28274476
8462	16815432	0	572743	0	160864732	19351849	0	170701	0	130549934
8463	587259	0	146358	0	16358914	3025438	0	51348	0	43234909
8464	5606753	0	0	0	99310701	2663436	0	0	0	38088827
8465	24412591	0	2402479	0	270823356	6554730	0	275719	0	69775162
8466	27863491	0	0	0	547073616	14417502	0	0	0	471840580
8467	89649507	0	0	0	891019098	16561038	0	0	0	381841995
8468	1604804	0	0	0	31902198	869795	0	0	0	32866457
8469	62607	0	15800	0	1024010	510682	0	93938	0	12865484
8470	6951429	0	18602224	0	187108923	1350660	0	2312191	0	90492406
8471	412407488	0	164949974	0	19374367688	127398948	0	313769869	0	9530561620
8472	22926614	0	682976	0	254036675	20164417	0	134037	0	482367963
8473	174823985	0	0	0	9064347648	52798872	0	0	0	5802415739
8474	53435963	0	0	0	293752514	111799837	0	0	0	789870164
8475	3784812	0	0	0	65519229	4168191	0	0	0	119508819
8476	9974510	0	0	0	134889028	2952367	0	0	0	114039013
8477	36047332	0	0	0	405974142	18427118	0	0	0	249045631
8478	1014908	0	0	0	36204378	5380558	0	0	0	149941864
8479	62913077	0	0	0	1283243652	66433968	0	0	0	1370352202
8480	137611217	0	0	0	185621447	5946561	0	0	0	105667513
8481	198863838	0	0	0	2097297042	66272131	0	0	0	1661795574
8482	54438996	0	0	0	646433657	28409868	0	0	0	496791199
8483	160899544	0	0	0	1078276887	81894219	0	0	0	791314866
8484	12174003	0	0	0	187452021	4875483	0	0	0	220749184
8485	21582561	0	0	0	289188160	21454181	0	0	0	571021891
8501	88978019	0	56150069	0	927151770	48452386	0	157094557	0	593425041
8502	15551574	0	733982	0	194453443	136801509	0	366741	0	1205948711
8503	20958807	0	0	0	340003133	38537727	0	0	0	333019009
8504	86183300	0	0	0	1445018334	26792677	0	0	0	1086318285
8505	10697988	0	0	0	97357648	8412283	0	0	0	361972640
8506	42131809	0	0	0	369565041	10555433	0	0	0	171449762
8507	171699536	0	0	0	499674117	115977034	0	0	0	388160483
8509	146407984	0	0	0	751795711	17459751	0	0	0	154180391
8510	7380725	0	0	0	144468885	974909	0	0	0	33500252
8511	32258614	0	0	0	520709648	44168479	0	0	0	568642978
8512	29572106	0	0	0	507689797	13654288	0	0	0	258227742
8513	10684145	0	0	0	77816873	1588439	0	0	0	27091401
8514	6364843	0	0	0	105401510	5135041	0	0	0	112396613
8515	10071144	0	0	0	233999250	7472934	0	0	0	220917799
8516	335865498	0	0	0	1989089433	70979073	0	0	0	620093821
8517	51776485	0	0	0	5431052524	22351545	0	0	0	3173977524
8518	66519724	0	0	0	841289044	26293579	0	0	0	659124438
8519	11509192	0	9795786	0	367045254	2303815	0	1203761	0	89760031
8520	3585729	0	4772467	0	355888765	1116517	0	85635036	0	64888206
8521	57464364	0	17966981	0	1421919890	8133332	0	2099802	0	295889969
8522	19393746	0	0	0	180162899	1333091	0	0	0	82396554
8523	58540231	0	0	0	722784618	25633340	0	0	0	403345776
8524	95436802	0	0	0	2224816212	38072103	0	0	0	1993542350
8525	37498523	0	60060287	0	10566098842	15515231	0	191264080	0	5814351648
8526	6294624	0	0	0	597428256	625573	0	0	0	278904828
8527	78735635	0	35774902	0	1303052504	7160133	0	2761454	0	172879621
8528	218119593	0	17543304	0	3692408545	85693520	0	6346874	0	1465556882
8529	76471525	0	0	0	1681243839	23421908	0	0	0	1470683937
8530	890043	0	0	0	79794818	1064858	0	0	0	71884177
8531	93521468	0	0	0	1614676681	8589277	0	0	0	667513639
8532	10551899	0	0	0	310168494	4179708	0	0	0	356595381
8533	10334366	0	0	0	180958564	3086260	0	0	0	212281287
8534	9903698	0	0	0	534609764	3204067	0	0	0	604861369
8535	16991475	0	0	0	143895452	5833736	0	0	0	183877031
8536	119794589	0	0	0	2222259766	48754350	0	0	0	1906673126
8537	9911093	0	0	0	531553717	10219505	0	0	0	519136828
8538	22821184	0	0	0	435830930	10046085	0	0	0	516628500
8539	54652954	0	0	0	617566991	15264893	0	0	0	354990881
8540	171160530	0	0	0	508410967	102002579	0	0	0	550587876
8541	8021899	0	0	0	1028260406	5840933	0	0	0	1264847012
8542	10932048	0	0	0	7535494963	6027909	0	0	0	5401484388
8543	26149096	0	0	0	855770251	12310415	0	0	0	1388610597
8544	355956415	0	0	0	2373336253	126397785	0	0	0	1046832211
8545	12773493	0	0	0	49648091	2130488	0	0	0	38762842
8546	7370623	0	0	0	61498750	4721565	0	0	0	99260471
8547	18757177	0	0	0	47818237	3453177	0	0	0	65667182
8548	19726337	0	0	0	596186147	7425632	0	0	0	493135648
8601	384	0	8	0	10691	842076	0	15	0	39130068
8602	671330	0	18	0	11395259	311353	0	17	0	1208674
8603	1624849	0	37	0	85218669	227690	0	246	0	485893
8604	1012054807	0	44	0	43555769	24169	0	131	0	407627
8605	23483	0	853	0	524670	255808	0	35	0	1711113
8606	21919167	0	811	0	85299120	224916	0	726	0	3926571
8607	31798527	0	0	0	419819100	11082447	0	0	0	183112664
8608	12262393	0	0	0	53054285	5733393	0	0	0	33183242
8609	20081366	0	25410	0	28402071	9601441	0	88376	0	25268493
8701	128755747	0	78110	0	1150118223	252970175	0	111835	0	1475166343
8702	18339921	0	3056	0	342004365	23098859	0	8742	0	262171810
8703	3314250958	0	2659423	0	43671911873	1703259991	0	1220617	0	22486871909
8704	524840740	0	286414	0	5027860845	350579450	0	114500	0	2400161659
8705	13366160	0	1049	0	175169271	11070317	0	702	0	76273705
8706	79103359	0	21946	0	892754048	2256784	0	77759	0	32249716
8707	128001395	0	755066	0	425164227	7440528	0	478395	0	52742962
8708	1907303367	0	0	0	13949916235	1070930509	0	0	0	7765849922
8709	2556492	0	0	0	28189679	1363112	0	0	0	17653361
8711	36714016	0	321686	0	806467262	8049027	0	36441	0	205508858
8712	68287230	0	4763518	0	358074257	3590152	0	250180	0	31320820
8713	8507328	0	426918	0	91125588	1147713	0	64968	0	36344332
8714	33706484	0	0	0	481827549	7487687	0	0	0	156594203
8715	20059898	0	0	0	139421698	2315836	0	0	0	32636062
8716	199495943	0	0	0	784083073	156665897	0	0	0	573313859
8804	49743	0	0	0	5126849	42496	0	0	0	17589468
8901	1371001	0	0	0	31379200	57861313	0	0	0	171906254
8902	248291	0	7	0	3224376	1845	0	10	0	218745
8903	18569744	0	261862	0	414652598	18575205	0	27282	0	733001174
8904	1601715	0	0	0	19595181	73769	0	0	0	673057
8905	51377	0	7	0	1535223	1057974	0	9	0	128310850
8906	535948	0	114	0	19287649	1368999	0	443	0	52322272
8907	2077497	0	0	0	25026340	5022731	0	0	0	56614874
8908	1840	0	0	0	52479	401000	0	0	0	91618
9001	11023487	0	0	0	688413264	3306710	0	0	0	641152726
9002	1579202	0	0	0	161393719	516027	0	0	0	70259446
9003	1088230	0	0	0	167080570	197055	0	0	0	44775439
9004	4835934	0	54086237	0	188921936	907036	0	14361271	0	60717337
9005	2692081	0	0	0	66997027	188846	0	0	0	27107927
9006	8455676	0	0	0	315525921	3220118	0	0	0	156384212
9007	891195	0	0	0	52800606	164413	0	0	0	36201898
9008	933386	0	0	0	28034656	714397	0	0	0	26179807
9009	146996137	0	0	0	1459094910	17586880	0	0	0	409109053
9010	7731550	0	0	0	224555836	946937	0	0	0	119754063
9011	455615	0	0	0	54784441	151406	0	0	0	45278274
9012	137866	0	0	0	32322610	198596	0	0	0	51367181
9013	25488185	0	0	0	326209685	669647	0	0	0	271917988
9014	1569844	0	0	0	1199627751	1787205	0	0	0	1344816438
9015	12719528	0	0	0	704115909	14328980	0	0	0	760024833
9016	189259	0	0	0	12718030	80927	0	0	0	8897566
9017	4863463	0	0	0	45879833	1728217	0	0	0	47315350
9018	66251964	0	0	0	3065656335	29389987	0	0	0	1939553193
9019	20404324	0	0	0	318897428	5061446	0	0	0	236003543
9020	900538	0	0	0	57698066	2015918	0	0	0	143886774
9021	8774885	0	0	0	1334311685	13737186	0	0	0	1276993720
9022	4865451	0	0	0	395650444	9972992	0	0	0	517791931
9023	2972740	0	0	0	77177182	3439033	0	0	0	139517811
9024	1112992	0	0	0	60895055	2705198	0	0	0	252393904
9025	5000471	0	0	0	84523290	1139299	0	0	0	97120313
9026	6803715	0	0	0	480213038	7422359	0	0	0	643175288
9027	15722951	0	0	0	982814420	7261280	0	0	0	1339794266
9028	4728030	0	0	0	114687432	2972813	0	0	0	120194285
9029	4050949	0	0	0	180252946	2523147	0	0	0	188170945
9030	2821213	0	0	0	591504016	2152484	0	0	0	791376109
9031	8255387	0	0	0	664073484	6678575	0	0	0	873483831
9032	15139780	0	0	0	1055406559	7732928	0	0	0	873582113
9033	1738437	0	0	0	147247622	4878343	0	0	0	271855589
9101	742955	0	4087337	0	337042483	178309	0	620478	0	165056647
9102	4608135	0	34973180	0	469175229	533095	0	3413856	0	80676970
9103	445157	0	1965519	0	6622487	78411	0	110257	0	2986612
9104	196201	0	438672	0	10983141	13680	0	18305	0	2415370
9105	10899509	0	23676971	0	94833677	804772	0	2370038	0	22151674
9106	871527	0	2194192	0	20433694	83628	0	411419	0	6372116
9107	1059613	0	3444415	0	26469663	339741	0	945655	0	9734127
9108	9424	0	448755	0	3217511	0	0	24529	0	2047698
9109	229856	0	914249	0	2848969	9870	0	76188	0	316798
9110	50259	0	0	0	5175946	11738	0	0	0	1222050
9111	56430	0	0	0	5406297	10476	0	0	0	2410375
9112	47231	0	0	0	656358	4229	0	0	0	212870
9113	401747	0	0	0	31217794	53831	0	0	0	2331924
9114	160797	0	0	0	18514801	14911	0	0	0	5583934
9201	2179756	0	23074	0	29037979	1152405	0	12737	0	20376403
9202	1767184	0	587836	0	44537140	163666	0	53550	0	16047370
9203	12006	0	5384	0	190787	40220	0	31	0	2067099
9204	64928	0	646181	0	1959684	3723	0	8922	0	693783
9205	552925	0	371986	0	38568441	106990	0	91529	0	15924583
9206	3496020	0	1541508	0	28497242	636472	0	20538	0	6129078
9207	6684847	0	884023	0	160884567	607861	0	111400	0	20813678
9208	632010	0	7431258	0	4390133	234816	0	503544	0	2584829
9209	4695984	0	0	0	77763784	430854	0	0	0	19581967
9303	232043	0	54251	0	53523157	23439	0	4119	0	24547820
9304	4022219	0	564200	0	18908212	107853	0	20604	0	6427735
9305	819797	0	0	0	28024265	140172	0	0	0	16204395
9306	38049588	0	0	0	86569330	5677118	0	0	0	67601112
9401	512461506	0	0	0	2939429504	50541313	0	0	0	647450657
9402	9554213	0	0	0	139411776	4907743	0	0	0	93764882
9403	2118597744	0	0	0	4187311342	208945491	0	0	0	1020105010
9404	54210012	0	0	0	318862479	14979049	0	0	0	116478858
9405	280605655	0	0	0	1265856291	31015005	0	0	0	488218988
9406	72190529	0	0	0	141464766	48310486	0	0	0	198646736
9501	21979796	0	0	0	115501219	778913	0	0	0	7189370
9502	22861847	0	0	0	188209424	3229098	0	0	0	30555675
9503	258988295	0	0	0	1857484201	32003474	0	0	0	355516217
9504	76147584	0	0	0	1305796801	20550443	0	0	0	541247763
9505	64874288	0	0	0	348792664	8245372	0	0	0	60195563
9506	208437264	0	0	0	1117843086	16359284	0	0	0	421101446
9507	6066339	0	0	0	96198068	1174156	0	0	0	39796069
9508	4033823	0	0	0	35568543	3079515	0	0	0	26103665
9601	252039	0	0	0	2793559	15474	0	0	0	559519
9602	2181565	0	0	0	22864533	319346	0	0	0	4242848
9603	51505125	0	577819540	0	335654377	11321223	0	296100788	0	164709027
9604	106679	0	0	0	807832	115882	0	0	0	4279587
9605	3663267	0	0	0	27019316	367668	0	0	0	5226821
9606	2192322	0	0	0	28649291	1600450	0	0	0	29589362
9607	1774397	0	0	0	20189963	1366116	0	0	0	26236575
9608	23180066	0	0	0	277075038	5656219	0	0	0	151977234
9609	12255856	0	0	0	49637911	1530006	0	0	0	13642970
9610	4547016	0	0	0	17184433	1554679	0	0	0	6806243
9611	1189904	0	0	0	21168668	186613	0	0	0	3491226
9612	5951881	0	0	0	119899481	4756986	0	0	0	133332463
9613	4799066	0	0	0	40109206	477109	0	0	0	11195395
9614	143521	0	0	0	3897335	21533	0	0	0	2798746
9615	4685968	0	0	0	49808153	583265	0	0	0	11891232
9616	5403869	0	0	0	85377985	949015	0	0	0	13379786
9617	4874964	0	0	0	22845442	215314	0	0	0	2996006
9618	838521	0	0	0	9888153	435189	0	0	0	17069153
9701	1204512	0	0	0	2344855709	694970	0	0	0	2760039007
9702	303969	0	0	0	64369765	148653	0	0	0	127893082
9703	727250	0	0	0	226300820	489936	0	0	0	276957746
9704	133637	0	0	0	74234491	572157	0	0	0	69130314
9705	5373511	0	0	0	208034056	446394	0	0	0	183811691
9706	1562189	0	0	0	733021931	5309253	0	0	0	1169573496
9999	0	0	0	0	22651249158	0	0	0	0	20598020346

## Sheet: Comtrade2005
Commodity Code	Import(Weight)	Import(Area)	Import(Quantity Number)	Import(Volume)	Import(Trade Value)	Export(Weight)	Export(Area)	Export(Quantity Number)	Export(Volume)	Export(Trade Value)
101	2348845	0	16028	0	699964156	2551797	0	6292	0	563498691
102	2014817	0	5027	0	4872010	0	0	0	0	0
103	34002398	0	560402	0	58089906	6168793	0	84777	0	17318911
104	116	0	1	0	1300	14260	0	636	0	215072
105	3533240	0	16577588	0	11605016	8780065	0	28210653	0	137827384
106	28367087	0	0	0	20970809	494099	0	0	0	16379205
201	170760198	0	0	0	851522859	6122440	0	0	0	34055697
202	88752869	0	0	0	260802940	2735816	0	0	0	11753629
203	427903007	0	0	0	1060020907	94275543	0	0	0	191025939
204	110733688	0	0	0	531441793	89755850	0	0	0	404990318
205	1173	0	0	0	8946	1297936	0	0	0	3966388
206	58416207	0	0	0	67551827	25271083	0	0	0	15069624
207	500138910	0	0	0	1437385612	304755218	0	0	0	381358487
208	9713087	0	0	0	15553441	2291967	0	0	0	12499963
209	27428033	0	0	0	24225384	6941079	0	0	0	3909373
210	287275830	0	0	0	976997644	11318765	0	0	0	51063979
301	2461254	0	0	0	41798942	986476	0	0	0	24976084
302	140961620	0	0	0	411334979	84709704	0	0	0	347933951
303	85717429	0	0	0	241694929	186563578	0	0	0	265271382
304	185493560	0	0	0	982712296	59840339	0	0	0	256063417
305	5407674	0	0	0	31148933	9267678	0	0	0	84223176
306	49289608	0	0	0	375133317	58594370	0	0	0	422189263
307	14833328	0	0	0	70549733	44611793	0	0	0	174369895
401	78667924	0	0	0	66546297	595609820	0	0	0	315269602
402	109947891	0	0	0	179264613	100596605	0	0	0	219539388
403	266509649	0	0	0	407071936	42427078	0	0	0	57147139
404	24315656	0	0	0	37382594	75625653	0	0	0	50860659
405	129454276	0	0	0	565457393	45014461	0	0	0	132606145
406	386425678	0	0	0	1683062248	98382606	0	0	0	409180730
407	54000465	0	0	0	72474193	9414765	0	0	0	42721410
408	19331387	0	0	0	44448583	3600235	0	0	0	6406994
409	28751379	0	0	0	63978237	955382	0	0	0	4492960
410	185042	0	0	0	2082381	214457	0	0	0	1383300
501	12296	0	0	0	1644723	9076	0	0	0	36280
502	1199198	0	0	0	13705576	986210	0	0	0	13124723
503	72645	0	0	0	807982	63559	0	0	0	462710
504	4468344	0	0	0	23386188	3957778	0	0	0	34812624
505	4910170	0	0	0	14007258	2904182	0	0	0	4766558
506	42016810	0	0	0	26353927	6799473	0	0	0	3364926
507	1903016	0	0	0	1182691	46	0	0	0	934
508	3147806	0	0	0	3083434	6623111	0	0	0	6810609
509	66693	0	0	0	993164	56535	0	0	0	1034411
510	6751	0	0	0	265170	7787	0	0	0	63834
511	88236871	0	0	0	51103617	49390492	0	0	0	32162022
601	21767129	0	0	0	96264002	10051004	0	0	0	13013641
602	132871305	0	0	0	505386483	9347823	0	0	0	29128197
603	160182897	0	0	0	959100846	7513014	0	0	0	40847565
604	13611290	0	0	0	59775820	7864371	0	0	0	3784856
701	485412936	0	0	0	167647879	220424676	0	0	0	93627842
702	420291075	0	0	0	686681323	4524659	0	0	0	9497293
703	351443704	0	0	0	176670860	8236658	0	0	0	9392736
704	175773154	0	0	0	243573754	5921041	0	0	0	9174482
705	188488921	0	0	0	256110290	6765824	0	0	0	17709585
706	95692026	0	0	0	86562964	18447750	0	0	0	10806040
707	134434872	0	0	0	146781061	1577600	0	0	0	2317998
708	48646341	0	0	0	166679608	50957966	0	0	0	17929776
709	522731864	0	0	0	1032685979	4417057	0	0	0	13735375
710	492010536	0	0	0	332901871	100241759	0	0	0	75277444
711	11473250	0	0	0	14454702	1249427	0	0	0	2540321
712	32496581	0	0	0	89071567	2023792	0	0	0	6127108
713	194795365	0	0	0	126965380	375825363	0	0	0	92095043
714	41391556	0	0	0	46140029	656472	0	0	0	2474943
801	49919644	0	0	0	153822578	3329045	0	0	0	8882084
802	67519135	0	0	0	242408861	3417730	0	0	0	18545022
803	861706395	0	0	0	624378649	8412994	0	0	0	8400384
804	203931456	0	0	0	269026692	8708181	0	0	0	13527755
805	794590917	0	0	0	624683354	41606599	0	0	0	34041366
806	360540799	0	0	0	659637250	15752456	0	0	0	48446584
807	208517599	0	0	0	170350469	5694378	0	0	0	5045222
808	666157014	0	0	0	690960748	29492826	0	0	0	18907342
809	198079907	0	0	0	295781190	2294038	0	0	0	4642159
810	118287588	0	0	0	378028505	0	0	0	0	12824960
811	57954395	0	0	0	88867445	1695642	0	0	0	3863627
812	16989912	0	0	0	16588812	1404404	0	0	0	1941428
813	33590752	0	0	0	142097854	3328543	0	0	0	8131836
814	951422	0	0	0	3061935	144506	0	0	0	824890
901	156097262	0	0	0	382495712	5121116	0	0	0	47667972
902	154745808	0	0	0	275862506	25707056	0	0	0	237115110
903	20675	0	0	0	41027	10951	0	0	0	111909
904	14662124	0	0	0	38797652	1175290	0	0	0	7577951
905	1881860	0	0	0	3866027	73052	0	0	0	653785
906	1259097	0	0	0	2400883	47166	0	0	0	258512
907	241921	0	0	0	934788	26125	0	0	0	247749
908	1337514	0	0	0	6520134	70529	0	0	0	646981
909	8530951	0	0	0	12863315	327688	0	0	0	1344788
910	25985219	0	0	0	46069792	5746232	0	0	0	18623008
1001	1196433652	0	0	0	244844109	2531109149	0	0	0	366500453
1002	3412305	0	0	0	603867	46820	0	0	0	41054
1003	70905465	0	0	0	15093785	830900029	0	0	0	126351334
1004	30838713	0	0	0	5389750	37047638	0	0	0	5759126
1005	1280613929	0	0	0	274072328	14060081	0	0	0	8879152
1006	703394322	0	0	0	379657800	39567959	0	0	0	43528968
1007	18204487	0	0	0	4564106	1117874	0	0	0	2685623
1008	32365873	0	0	0	13543687	224224	0	0	0	323391
1101	103064835	0	0	0	39031124	121548346	0	0	0	47890608
1102	20601038	0	0	0	13472822	6974327	0	0	0	4569628
1103	29381652	0	0	0	9765479	14059141	0	0	0	6190617
1104	60792641	0	0	0	22217992	84618583	0	0	0	53667985
1105	37915091	0	0	0	43229197	6046251	0	0	0	6598939
1106	2328352	0	0	0	5170279	782834	0	0	0	1671292
1107	5869093	0	0	0	9276968	298345326	0	0	0	115251350
1108	164469008	0	0	0	75755959	20708510	0	0	0	11204285
1109	29025830	0	0	0	28279861	5914955	0	0	0	5176740
1201	777068609	0	0	0	227452218	2865297	0	0	0	1699393
1202	119486918	0	0	0	111281245	1609879	0	0	0	2884598
1203	50819	0	0	0	61869	2416	0	0	0	15282
1204	3369955	0	0	0	3867008	62925939	0	0	0	25136404
1205	51175428	0	0	0	18416682	173783198	0	0	0	35404563
1206	52801188	0	0	0	32012924	696864	0	0	0	1266163
1207	71719224	0	0	0	31492546	3207403	0	0	0	5707887
1208	26495369	0	0	0	13070762	6949341	0	0	0	3465025
1209	23736287	0	0	0	128902345	4494849	0	0	0	52948831
1210	2462460	0	0	0	13701881	1702798	0	0	0	10523323
1211	8627194	0	0	0	49987108	2401386	0	0	0	18444588
1212	27915244	0	0	0	32738640	1410278	0	0	0	6204998
1213	94958098	0	0	0	15407149	419938	0	0	0	350432
1214	25585061	0	0	0	9359482	1050050	0	0	0	529222
1301	13012062	0	0	0	49214197	6270868	0	0	0	32590409
1302	22787272	0	0	0	114097265	8800315	0	0	0	60091483
1401	9740531	0	0	0	7172010	215077	0	0	0	979372
1402	16066	0	0	0	18190	39	0	0	0	567
1403	1104995	0	0	0	789815	653	0	0	0	47928
1404	113695432	0	0	0	25361825	601598	0	0	0	784316
1501	29390823	0	0	0	21258480	8355777	0	0	0	4873086
1502	34938241	0	0	0	21141432	16025985	0	0	0	9490755
1503	3862572	0	0	0	2064062	117276	0	0	0	253398
1504	30108822	0	0	0	41190579	2236907	0	0	0	19837532
1505	4417332	0	0	0	11073469	6200914	0	0	0	32718602
1506	59825	0	0	0	747490	2862820	0	0	0	1471913
1507	146448941	0	0	0	104357305	22504882	0	0	0	16091436
1508	5140923	0	0	0	7206210	161610	0	0	0	503346
1509	60886049	0	0	0	207892292	3404453	0	0	0	14377382
1510	1802334	0	0	0	3428112	86276	0	0	0	223142
1511	674611254	0	0	0	309275957	35267548	0	0	0	28850701
1512	130536470	0	0	0	113111337	4816213	0	0	0	6762063
1513	92441951	0	0	0	66425492	2987200	0	0	0	2734690
1514	80497184	0	0	0	63284938	131318987	0	0	0	111645517
1515	31199785	0	0	0	55938436	27480068	0	0	0	39854433
1516	47429975	0	0	0	106416188	61058108	0	0	0	77883542
1517	53417796	0	0	0	64790135	74057822	0	0	0	105470195
1518	6176652	0	0	0	9972640	31618054	0	0	0	30226064
1520	144280042	0	0	0	19536134	1035951	0	0	0	501534
1521	1046340	0	0	0	4804566	240140	0	0	0	1386952
1522	121601	0	0	0	192136	1945433	0	0	0	751222
1601	60537288	0	0	0	265591809	4932689	0	0	0	17768198
1602	426069385	0	0	0	1469323998	48080331	0	0	0	218567174
1603	1689061	0	0	0	7209973	801215	0	0	0	5143580
1604	208478055	0	0	0	657043850	19247864	0	0	0	89626746
1605	56757751	0	0	0	357671959	5592996	0	0	0	41286395
1701	1446020347	0	0	0	1014675398	863573493	0	0	0	322725986
1702	307006160	0	0	0	166261523	119788735	0	0	0	69583640
1703	434763038	0	0	0	61727176	46183083	0	0	0	16369944
1704	127886959	0	0	0	418396435	54276657	0	0	0	259334732
1801	141490020	0	0	0	222569994	1367620	0	0	0	1739142
1802	279697	0	0	0	146096	686625	0	0	0	228172
1803	10144333	0	0	0	24905944	12151022	0	0	0	23138286
1804	72057995	0	0	0	279372622	26664083	0	0	0	90877475
1805	14200645	0	0	0	31910320	4959471	0	0	0	8214165
1806	339723783	0	0	0	1090940393	124220057	0	0	0	520169182
1901	202026225	0	0	0	427573012	132757746	0	0	0	244959525
1902	274804468	0	0	0	338643370	22695026	0	0	0	51596025
1903	969532	0	0	0	1013515	84270	0	0	0	177028
1904	85100939	0	0	0	189341630	171433090	0	0	0	550732118
1905	570173527	0	0	0	1452282934	335225272	0	0	0	822400572
2001	52108213	0	0	0	65636007	5652707	0	0	0	16684512
2002	407207890	0	0	0	321065015	5002969	0	0	0	5321609
2003	12115967	0	0	0	20347638	1210314	0	0	0	722021
2004	372608820	0	0	0	290426591	24735059	0	0	0	46148980
2005	342965309	0	0	0	386509323	64020870	0	0	0	146256830
2006	10772355	0	0	0	31401445	540122	0	0	0	1287487
2007	45848460	0	0	0	88792073	12903767	0	0	0	37915015
2008	290290215	0	0	0	441533191	24353152	0	0	0	57677479
2009	6168567611	0	0	0	751621231	34938562	0	0	0	55934071
2101	30341594	0	0	0	200493850	28652169	0	0	0	200402092
2102	32268141	0	0	0	39413014	22110590	0	0	0	62923817
2103	384762469	0	0	0	586206660	95244263	0	0	0	227769626
2104	43491352	0	0	0	109297014	21874626	0	0	0	49323938
2105	83714192	0	0	0	240758953	52466493	0	0	0	89810090
2106	1200321348	0	0	0	819616803	129375019	0	0	0	687898398
2201	658380134	0	0	624821687	203339457	88848285	0	0	78756142	37707869
2202	617908836	0	0	639766359	758849754	355276199	0	0	343883510	316166507
2203	849178504	0	0	777626227	669488771	466631968	0	0	418459598	607121475
2204	8146538664	0	0	1606044592	5258354062	39642840	0	0	22291130	244628709
2205	17182333	0	0	16172015	24127682	502040	0	0	167727	1139404
2206	44435485	0	0	35925121	70801822	23597826	0	0	19703562	26927581
2207	325032758	0	0	391573460	160287191	268651724	0	0	219032391	171738891
2208	168107249	0	0	213603628	832263506	814163423	0	0	339926015	5185562286
2209	191474041	0	0	16562635	23947695	6045655	0	0	4324471	3768260
2301	165989761	0	0	0	113375300	22765401	0	0	0	13221184
2302	72913892	0	0	0	11265919	5645831	0	0	0	1836810
2303	372038999	0	0	0	59449977	102122663	0	0	0	15463252
2304	1669429610	0	0	0	426273481	18308609	0	0	0	5799611
2305	0	0	0	0	0	2	0	0	0	5159
2306	1522211462	0	0	0	167134480	195237223	0	0	0	27713373
2307	0	0	0	0	0	12935	0	0	0	16264
2308	397363106	0	0	0	53097507	32626550	0	0	0	5230209
2309	1489704878	0	0	0	824546887	416428867	0	0	0	501051146
2401	116441149	0	0	0	376753628	5717121	0	0	0	29143301
2402	6235834	0	0	0	361961558	38538547	0	0	0	911776147
2403	9323083	0	0	0	64386547	9784371	0	0	0	183158328
2501	270224877	0	0	0	30235719	591149006	0	0	0	51783151
2502	33260	0	0	0	56431	2090	0	0	0	20369
2503	29941092	0	0	0	3261440	430060	0	0	0	1122293
2504	18058895	0	0	0	17695113	4016700	0	0	0	8370223
2505	434163429	0	0	0	23319573	537172448	0	0	0	18127865
2506	1145527	0	0	0	1536935	3083789	0	0	0	1221140
2507	84617198	0	0	0	17826836	2856397816	0	0	0	365544363
2508	324177131	0	0	0	60069107	66828151	0	0	0	36668123
2509	3850410	0	0	0	716676	43848153	0	0	0	3633201
2510	31293528	0	0	0	4096305	1544590	0	0	0	374286
2511	54779418	0	0	0	5906271	3626220	0	0	0	1627085
2512	28900056	0	0	0	8357304	701145	0	0	0	1044220
2513	86771526	0	0	0	5118153	999119	0	0	0	1483319
2514	29190480	0	0	0	14388653	4597804	0	0	0	1278360
2515	64295833	0	0	0	36296118	2193000	0	0	0	528488
2516	1558248518	0	0	0	133508754	6960040	0	0	0	2397157
2517	2498013697	0	0	0	54902649	13566179265	0	0	0	119353452
2518	218792918	0	0	0	7370192	176770282	0	0	0	12564507
2519	101119689	0	0	0	34850267	20630603	0	0	0	29391744
2520	544868180	0	0	0	37372686	57939412	0	0	0	22988023
2521	123361447	0	0	0	7691013	270312886	0	0	0	7396853
2522	14651116	0	0	0	3847450	232958535	0	0	0	21246857
2523	577638684	0	0	0	65330988	533311471	0	0	0	86236779
2524	0	0	0	0	0	1014	0	0	0	14474
2525	11436805	0	0	0	4345466	4208855	0	0	0	5194836
2526	66090985	0	0	0	19869698	4413218	0	0	0	2382843
2528	5859838	0	0	0	2485344	33312	0	0	0	16158
2529	83740237	0	0	0	11841104	4426995	0	0	0	2019218
2530	1363671997	0	0	0	56209598	232393507	0	0	0	30054418
2601	16147245761	0	0	0	830654434	1650045	0	0	0	853810
2602	671855	0	0	0	417354	64034	0	0	0	73027
2603	247139	0	0	0	1328531	13475	0	0	0	304775
2604	1266	0	0	0	29379	810990	0	0	0	9288201
2605	6202	0	0	0	184484	220	0	0	0	9351
2606	103368725	0	0	0	17635342	4349887	0	0	0	2733340
2607	211847	0	0	0	312639	507435	0	0	0	612736
2608	890938	0	0	0	1542022	140629	0	0	0	164253
2609	0	0	0	0	0	1736	0	0	0	17320
2610	121886574	0	0	0	10899643	228199	0	0	0	184435
2611	6976	0	0	0	163771	4653	0	0	0	92131
2612	1	0	0	0	1374	0	0	0	0	0
2613	20163002	0	0	0	460029298	178750	0	0	0	6358270
2614	189688579	0	0	0	53457460	109572	0	0	0	1523653
2615	19784514	0	0	0	16741161	840189	0	0	0	1440556
2616	272678	0	0	0	183591422	88977	0	0	0	2537394
2617	1047	0	0	0	811551	54980	0	0	0	211218
2618	335987451	0	0	0	8706386	64817848	0	0	0	5188723
2619	299568590	0	0	0	100828938	1083156	0	0	0	323187
2620	13956065	0	0	0	561125562	36559011	0	0	0	174985128
2621	116816484	0	0	0	13233601	20551496	0	0	0	15300020
2701	44443123849	0	0	0	3449360599	590682166	0	0	0	81678256
2702	1871474	0	0	0	939055	2938094	0	0	0	527245
2703	432856483	0	0	0	51982177	35924173	0	0	0	7381054
2704	734736874	0	0	0	158602853	194261912	0	0	0	44995520
2705	1	0	0	0	91	150	0	0	0	9722
2706	0	0	0	0	0	8541524	0	0	0	3264287
2707	1036040691	0	0	0	555497005	479946146	0	0	0	291591371
2708	6388330	0	0	0	2402322	26748005	0	0	0	8519618
2709	56298560891	0	0	0	21569780721	50825464440	0	0	0	20017577103
2710	29352866211	0	0	0	14337447689	30738627711	0	0	0	13036266561
2711	8160103497	0	0	0	3627685056	5460055389	0	0	0	2871592262
2712	36616443	0	0	0	38749227	65406826	0	0	0	49899600
2713	1064059616	0	0	0	126713526	215448975	0	0	0	45241170
2714	47519498	0	0	0	10956296	166975765	0	0	0	31235390
2715	258406448	0	0	0	62855497	329980427	0	0	0	65665200
2716	12225869	12225869	0	0	817686535	2875255	2875255	0	0	184301483
2801	9075996	0	0	0	21764052	3509624	0	0	0	9556533
2802	616289	0	0	0	794701	1457603	0	0	0	969149
2803	23660668	0	0	0	29969493	50906417	0	0	0	56074691
2804	86385886	0	0	0	207943009	19281721	0	0	0	75614660
2805	8527137	0	0	0	19940969	763748	0	0	0	7512234
2806	3047552	0	0	0	2282801	17218412	0	0	0	4641278
2807	403921618	0	0	0	16312306	29262108	0	0	0	4399162
2808	7302046	0	0	0	3747634	7092317	0	0	0	1744749
2809	169198169	0	0	0	73713283	10087143	0	0	0	10365405
2810	10977534	0	0	0	7331230	375551	0	0	0	1010262
2811	70101400	0	0	0	97459196	87557490	0	0	0	149645683
2812	20874467	0	0	0	25548217	197070	0	0	0	3311414
2813	4079938	0	0	0	1566852	821772	0	0	0	5500652
2814	113039873	0	0	0	38198287	209781295	0	0	0	55306599
2815	347355322	0	0	0	55874874	206144	0	0	0	839240
2816	12073690	0	0	0	7623368	175439	0	0	0	248790
2817	7160728	0	0	0	10941872	6032867	0	0	0	11000396
2818	918623188	0	0	0	301751695	9454484	0	0	0	12920152
2819	3087538	0	0	0	6074988	24950	0	0	0	128106
2820	7319920	0	0	0	3780884	3416022	0	0	0	1808840
2821	44830255	0	0	0	43022490	8287373	0	0	0	18408152
2822	106299	0	0	0	2513230	1100772	0	0	0	20324581
2823	8771105	0	0	0	21310714	1580043	0	0	0	6468894
2824	1715614	0	0	0	2895181	31279371	0	0	0	13729727
2825	17901749	0	0	0	146214490	5790709	0	0	0	57996821
2826	15271980	0	0	0	17146258	5581970	0	0	0	12134212
2827	88918533	0	0	0	73020366	29004972	0	0	0	35611665
2828	12408894	0	0	0	14585728	22416433	0	0	0	17031076
2829	3663572	0	0	0	5409252	1303401	0	0	0	8990307
2830	7005855	0	0	0	8169075	439308	0	0	0	1183056
2831	14754916	0	0	0	5795229	170116	0	0	0	1102967
2832	12135153	0	0	0	2880166	43303680	0	0	0	12486316
2833	191953102	0	0	0	73759545	17484955	0	0	0	10803136
2834	35772278	0	0	0	14781814	4288301	0	0	0	6434044
2835	214253958	0	0	0	108441538	53195267	0	0	0	64568538
2836	148623238	0	0	0	48862281	48586346	0	0	0	59427313
2837	5911646	0	0	0	5215986	1273888	0	0	0	1546250
2838	1174879	0	0	0	2944262	714924	0	0	0	3968420
2839	38584714	0	0	0	20589047	13068414	0	0	0	13927787
2840	29626100	0	0	0	11639526	2238110	0	0	0	4396544
2841	32848281	0	0	0	19386118	37132852	0	0	0	22675092
2842	6364419	0	0	0	12303175	5448090	0	0	0	14058053
2843	154925	0	0	0	94619989	835581	0	0	0	554752017
2844	1552918	0	0	0	731729207	3731275	0	0	0	121473511
2845	25102	0	0	0	5071701	27587	0	0	0	2664772
2846	3539686	0	0	0	18708844	1312363	0	0	0	16785853
2847	21039916	0	0	0	8978248	7998094	0	0	0	3544009
2848	81197	0	0	0	1598593	5617	0	0	0	100810
2849	33987690	0	0	0	86773068	763925	0	0	0	4938979
2850	1096784	0	0	0	14807070	365329	0	0	0	11367559
2851	1700653	0	0	0	8946194	1459947	0	0	0	12951695
2901	141640831	0	0	0	125149071	1521974404	0	0	0	1192672426
2902	572943737	0	0	0	545957352	1063500447	0	0	0	781406411
2903	349117735	0	0	0	331652202	95500204	0	0	0	236561024
2904	416681237	0	0	0	48712083	41132869	0	0	0	48585351
2905	377745700	0	0	0	367996117	147635644	0	0	0	126677096
2906	6395799	0	0	0	51227755	3213769	0	0	0	20613102
2907	132293249	0	0	0	192306456	34059338	0	0	0	154480755
2908	2103236	0	0	0	14914032	9575337	0	0	0	39381322
2909	117761447	0	0	0	646438537	82181014	0	0	0	75663098
2910	68405300	0	0	0	84247561	1302182	0	0	0	4034774
2911	188190	0	0	0	1713504	375678	0	0	0	1631788
2912	16365933	0	0	0	55998669	31771818	0	0	0	91597636
2913	318496	0	0	0	8496881	74234	0	0	0	939772
2914	202393262	0	0	0	246779393	31487054	0	0	0	147610557
2915	457038847	0	0	0	313779416	343966188	0	0	0	429835516
2916	315924457	0	0	0	354100050	55476289	0	0	0	241713779
2917	290172507	0	0	0	315244504	635795934	0	0	0	543411345
2918	82898418	0	0	0	185481689	85896876	0	0	0	228225222
2919	9219385	0	0	0	23876449	21279734	0	0	0	57940554
2920	19736742	0	0	0	34003620	2566756	0	0	0	10162010
2921	90230410	0	0	0	377632414	271774223	0	0	0	334627877
2922	128385251	0	0	0	1571264322	82605526	0	0	0	327082297
2923	21343873	0	0	0	40486971	12165892	0	0	0	31924926
2924	75445815	0	0	0	261527264	31450299	0	0	0	186739951
2925	2774748	0	0	0	31065947	25859356	0	0	0	86489383
2926	104640149	0	0	0	190233664	100926526	0	0	0	381336737
2927	3451579	0	0	0	13075624	1025948	0	0	0	5119276
2928	1399536	0	0	0	18817422	1905725	0	0	0	35060869
2929	36188688	0	0	0	91078311	24420729	0	0	0	28664958
2930	23513482	0	0	0	1158727906	9223350	0	0	0	889035989
2931	16223858	0	0	0	75841213	143926343	0	0	0	342568604
2932	21241081	0	0	0	962220004	8712003	0	0	0	286678213
2933	84582874	0	0	0	1972923643	48290036	0	0	0	2047500446
2934	5290664	0	0	0	1277662416	11314973	0	0	0	1342119499
2935	3895818	0	0	0	727823260	900087	0	0	0	168651056
2936	24049478	0	0	0	139818054	3032878	0	0	0	87101302
2937	353831	0	0	0	121822817	100571	0	0	0	421030023
2938	484097	0	0	0	4260787	58938	0	0	0	6808468
2939	740100	0	0	0	177352534	367341	0	0	0	37196403
2940	19166151	0	0	0	42850474	5927252	0	0	0	16719817
2941	7132021	0	0	0	340900839	4274024	0	0	0	266613050
2942	1958585	0	0	0	38999542	833144	0	0	0	59293783
3001	647835	0	0	0	26418164	195471	0	0	0	24713218
3002	5938750	0	0	0	1709737374	7762046	0	0	0	1099165061
3003	12277208	0	0	0	626200749	5793786	0	0	0	371049423
3004	268491964	0	0	0	12285167341	264241387	0	0	0	18554571833
3005	16071286	0	0	0	287081877	14616279	0	0	0	500427783
3006	11241345	0	0	0	366766333	3467667	0	0	0	507876863
3101	42487299	0	0	0	11434409	9486336	0	0	0	8069127
3102	2028853214	0	0	0	421527447	130472200	0	0	0	38402457
3103	177949373	0	0	0	35694841	1386091	0	0	0	782410
3104	226240111	0	0	0	46490499	1152098	0	0	0	1475771
3105	740052303	0	0	0	179365835	92814502	0	0	0	56947249
3201	1396077	0	0	0	2895521	199303	0	0	0	1349931
3202	1816310	0	0	0	4619342	27528035	0	0	0	33032302
3203	3180921	0	0	0	23953400	1780523	0	0	0	26269412
3204	54237666	0	0	0	355743613	74817604	0	0	0	496685916
3205	443001	0	0	0	5419193	500388	0	0	0	17803235
3206	183349990	0	0	0	249580289	217892608	0	0	0	491767620
3207	25560006	0	0	0	73731698	10433907	0	0	0	177337574
3208	72783144	0	0	0	316557531	135121328	0	0	0	557353391
3209	85311093	0	0	0	199964297	77105228	0	0	0	173932431
3210	3870137	0	0	0	18505318	8723690	0	0	0	35904594
3211	3564675	0	0	0	5358330	5126031	0	0	0	16637629
3212	7691575	0	0	0	75314322	7436090	0	0	0	126975828
3213	12229294	0	0	0	20527709	8134103	0	0	0	62166579
3214	90195239	0	0	0	227097636	55892267	0	0	0	151178818
3215	75579176	0	0	0	644740119	79521381	0	0	0	866699746
3301	15053207	0	0	0	182168948	6488381	0	0	0	106347772
3302	42933671	0	0	0	854353966	55853271	0	0	0	640904110
3303	32374478	0	0	0	816625735	35296898	0	0	0	532701510
3304	120108565	0	0	0	1497562313	71956857	0	0	0	1197810055
3305	130006939	0	0	0	462852978	129591776	0	0	0	513768906
3306	27397195	0	0	0	152004370	67684691	0	0	0	308408261
3307	118929420	0	0	0	490202813	242637012	0	0	0	947269882
3401	193564092	0	0	0	353085263	158075781	0	0	0	331805560
3402	563175272	0	0	0	901479659	1008805038	0	0	0	1097394368
3403	44832960	0	0	0	129089437	59732322	0	0	0	199749381
3404	27016212	0	0	0	67932967	18379631	0	0	0	50252218
3405	35227435	0	0	0	79751344	22106824	0	0	0	81533570
3406	59647532	0	0	0	159459959	53042175	0	0	0	64972037
3407	3529743	0	0	0	16826237	1108754	0	0	0	6374397
3501	6195532	0	0	0	38747295	4448701	0	0	0	26903180
3502	7720315	0	0	0	35442257	2357351	0	0	0	14974424
3503	14096576	0	0	0	75210263	0	0	0	0	0
3504	4727788	0	0	0	49893995	13532503	0	0	0	52168522
3505	160777990	0	0	0	118774087	9141196	0	0	0	24151486
3506	152335294	0	0	0	210804465	106785339	0	0	0	247030825
3507	9475905	0	0	0	125058596	3560436	0	0	0	165035141
3604	17925894	0	0	0	36922994	113906	0	0	0	2409506
3605	1371032	0	0	0	6148469	51095	0	0	0	1059679
3606	5627648	0	0	0	16440640	22617474	0	0	0	26421468
3701	25905629	0	0	0	342158495	23218081	0	0	0	224409738
3702	21945671	0	0	0	353808580	9294995	0	0	0	265162290
3703	11619905	0	0	0	71475419	59758387	0	0	0	341830468
3704	681069	0	0	0	4199711	11195893	0	0	0	9417437
3705	1295372	0	0	0	15949387	288442	0	0	0	83078792
3706	1063338	0	0	0	22509681	687824	0	0	0	29816159
3707	51831224	0	0	0	403402240	23519287	0	0	0	321274207
3801	14839640	0	0	0	30928314	19277727	0	0	0	34898310
3802	143279678	0	0	0	42214732	57026451	0	0	0	54244725
3803	3789704	0	0	0	2986583	679313	0	0	0	1345766
3804	45742378	0	0	0	9675885	406006	0	0	0	909618
3805	3014350	0	0	0	3050422	312255	0	0	0	1099631
3806	42953304	0	0	0	61572969	15575210	0	0	0	31414924
3807	120652161	0	0	0	36983166	820358	0	0	0	1749380
3808	80205291	0	0	0	672274999	158981007	0	0	0	1147765508
3809	429715034	0	0	0	102595327	26158549	0	0	0	64370576
3810	11252703	0	0	0	24915151	8482573	0	0	0	66009304
3811	79524168	0	0	0	198577967	103881336	0	0	0	254639027
3812	30367914	0	0	0	98966073	26920599	0	0	0	77240538
3813	2104652	0	0	0	6479696	16993053	0	0	0	24040549
3814	12023280	0	0	0	27234803	28936850	0	0	0	50937249
3815	25691577	0	0	0	211626177	25785133	0	0	0	506083822
3816	71292458	0	0	0	33445383	94829793	0	0	0	121604139
3817	118335779	0	0	0	122915137	129123116	0	0	0	12872293
3818	464634	0	0	0	80592259	531572	0	0	0	139670277
3819	4786261	0	0	0	18651712	19905076	0	0	0	46541425
3820	16839023	0	0	0	24642809	37674296	0	0	0	44979293
3821	2356242	0	0	0	56788644	4254234	0	0	0	103706720
3822	10258952	0	0	0	823188958	11573487	0	0	0	1579915161
3823	539640866	0	0	0	190746167	70568138	0	0	0	77760806
3824	483475003	0	0	0	1141621316	931587189	0	0	0	1232153237
3825	1093338	0	0	0	1777176	2105947	0	0	0	2937604
3901	1417284157	0	0	0	1721656814	56857149	0	0	0	126796523
3902	597859013	0	0	0	782763570	287302865	0	0	0	397549906
3903	236748125	0	0	0	407417935	256658342	0	0	0	413421383
3904	356411542	0	0	0	481786532	185164997	0	0	0	289997437
3905	44195577	0	0	0	99714923	48486919	0	0	0	92826134
3906	190387757	0	0	0	398328958	247598440	0	0	0	593706897
3907	465796356	0	0	0	1070636880	290265749	0	0	0	603265086
3908	68821829	0	0	0	243574312	189377391	0	0	0	373561335
3909	99211008	0	0	0	198035131	95546275	0	0	0	245713754
3910	33962571	0	0	0	160263495	162776899	0	0	0	538672877
3911	45621892	0	0	0	141133811	15567297	0	0	0	210475145
3912	35724181	0	0	0	136851718	9041256	0	0	0	86323486
3913	3278779	0	0	0	31488874	3887066	0	0	0	41221281
3914	5686195	0	0	0	25880361	5349809	0	0	0	26128200
3915	45560571	0	0	0	21661943	324535457	0	0	0	135936668
3916	60345829	0	0	0	165281059	27878946	0	0	0	103090409
3917	82518731	0	0	0	391778428	96525418	0	0	0	693415564
3918	85422775	0	0	0	181105609	78349872	0	0	0	230088208
3919	140941817	0	0	0	528543454	50547715	0	0	0	453049996
3920	611484533	0	0	0	1859154698	340379293	0	0	0	1329112596
3921	184992706	0	0	0	822166321	84328634	0	0	0	440230401
3922	30041375	0	0	0	182369152	21309462	0	0	0	125000465
3923	856730125	0	0	0	2017435481	215959215	0	0	0	1045762924
3924	134545312	0	0	0	451036953	37499455	0	0	0	157159220
[truncated: 771 more rows]

## Sheet: Comtrade2006
Commodity Code	Import(Weight)	Import(Area)	Import(Quantity Number)	Import(Volume)	Import(Trade Value)	Export(Weight)	Export(Area)	Export(Quantity Number)	Export(Volume)	Export(Trade Value)
[truncated: 1,237 more rows]

[truncated: 4 more sheets: Comtrade2007, Comtrade2008, Comtrade2009, Comtrade2010]
